# Supplementary material
Source: PubMed Central journal article supplement (PMC2639361)
Supplement: ddn181_1.pdf [file ddn181_1.pdf]

**Supplemental Table 1: SNP-Specific Results for Abstinence Rates at End of Treatment**

| SNP        | Gene        | Chr | Position    | MAF <sup>a</sup> | Genetic Model <sup>b</sup> | SNP Odds Ratio<br>(95% CI) | Treatment Odds Ratio |                     | Test of Interaction <sup>c</sup> | LRT <sup>d</sup> |            |
|------------|-------------|-----|-------------|------------------|----------------------------|----------------------------|----------------------|---------------------|----------------------------------|------------------|------------|
|            |             |     |             |                  |                            |                            | WT (95% CI)          | Variant (95% CI)    |                                  | Observed P       | Adjusted P |
| rs2072661  | CHRNA2      | 1   | 152,815,504 | 0.23             | Dom                        | 0.4 (0.25-0.67)            | 1.77 (1.02-3.07)     | 1.81 (0.79-4.14)    | 9.70E-01                         | 9.97E-04         | 1.33E-02   |
| rs2072660  | CHRNA2      | 1   | 152,815,345 | 0.23             | Add                        | 0.5 (0.32-0.76)            | 1.51 (0.88-2.59)     | 2.33 (1.11-4.88)    | 3.28E-01                         | 2.86E-03         | 2.34E-02   |
| rs12961210 | ADCYAP1     | 18  | 890,523     | 0.32             | Add                        | 1.85 (1.33-2.57)           | 2.15 (1.07-4.31)     | 1.86 (1.14-3.03)    | 6.74E-01                         | 1.15E-03         | 2.59E-02   |
| rs2565059  | CHRNA2      | 8   | 27,392,895  | 0.19             | Add                        | 2.32 (1.46-3.68)           | 1.76 (0.98-3.16)     | 2.06 (1.11-3.83)    | 7.97E-01                         | 1.49E-03         | 3.14E-02   |
| rs1936158  | HTR1B       | 6   | 78,241,094  | 0.41             | Dom                        | 0.53 (0.33-0.84)           | 3.14 (1.52-6.49)     | 1.14 (0.63-2.07)    | 3.51E-02                         | 1.20E-03         | 3.43E-02   |
| rs10517626 | TDO2        | 4   | 157,050,894 | 0.10             | Add                        | 1.81 (1.1-2.99)            | 1.39 (0.84-2.31)     | 3.98 (1.6-9.91)     | 4.26E-02                         | 4.03E-03         | 4.16E-02   |
| rs11575553 | DDC         | 7   | 50,493,713  | 0.11             | Dom                        | 1.96 (1.12-3.42)           | 1.38 (0.83-2.3)      | 4.9 (1.81-13.22)    | 2.63E-02                         | 3.46E-03         | 6.19E-02   |
| rs2985331  | EPB41       | 1   | 29,207,950  | 0.15             | Dom                        | 2.21 (1.37-3.56)           | 1.65 (0.93-2.91)     | 2.4 (1.11-5.19)     | 4.45E-01                         | 3.58E-03         | 7.22E-02   |
| rs265975   | DRD1        | 5   | 174,794,801 | 0.33             | Dom                        | 0.5 (0.32-0.79)            | 2.29 (1.21-4.31)     | 1.26 (0.65-2.44)    | 2.02E-01                         | 3.25E-03         | 7.86E-02   |
| rs11904814 | CREB1       | 2   | 208,135,043 | 0.31             | Add                        | 0.6 (0.41-0.88)            | 1.26 (0.7-2.28)      | 2.46 (1.34-4.52)    | 9.06E-02                         | 1.17E-02         | 8.20E-02   |
| rs2551640  | CREB1       | 2   | 208,116,138 | 0.36             | Add                        | 0.61 (0.43-0.87)           | 1.3 (0.7-2.41)       | 2.15 (1.25-3.72)    | 1.66E-01                         | 1.35E-02         | 9.22E-02   |
| rs4837479  | FREQ (NCS1) | 9   | 131,979,828 | 0.15             | Add                        | 0.73 (0.44-1.22)           | 1.15 (0.69-1.91)     | 5.83 (2.26-15.07)   | 2.42E-03                         | 4.08E-03         | 1.03E-01   |
| rs1213369  | HTR1B       | 6   | 78,234,976  | 0.43             | Dom                        | 0.53 (0.33-0.85)           | 2.95 (1.39-6.27)     | 1.32 (0.75-2.34)    | 9.53E-02                         | 4.44E-03         | 1.09E-01   |
| rs13152449 | TDO2        | 4   | 157,055,252 | 0.10             | Add                        | 1.71 (1.04-2.83)           | 1.44 (0.87-2.39)     | 3.72 (1.48-9.31)    | 6.83E-02                         | 1.24E-02         | 1.11E-01   |
| rs7369949  | CREB1       | 2   | 208,159,033 | 0.36             | Add                        | 0.63 (0.45-0.9)            | 1.24 (0.66-2.3)      | 2.22 (1.29-3.82)    | 1.10E-01                         | 1.80E-02         | 1.17E-01   |
| rs1916610  | ADCYAP1     | 18  | 882,847     | 0.47             | Add                        | 1.71 (1.22-2.39)           | 2.1 (0.9-4.91)       | 1.85 (1.17-2.93)    | 7.13E-01                         | 6.04E-03         | 1.18E-01   |
| rs4140535  | HTR1B       | 6   | 78,231,771  | 0.37             | Dom                        | 0.57 (0.36-0.89)           | 2.74 (1.37-5.46)     | 1.2 (0.66-2.21)     | 8.04E-02                         | 5.77E-03         | 1.29E-01   |
| rs17635123 | DDC         | 7   | 50,543,469  | 0.12             | Dom                        | 1.83 (1.08-3.11)           | 1.4 (0.83-2.36)      | 4.36 (1.73-11.03)   | 3.62E-02                         | 8.42E-03         | 1.64E-01   |
| rs863126   | DRD1        | 5   | 174,795,954 | 0.34             | Dom                        | 1.86 (1.17-2.95)           | 1.32 (0.64-2.74)     | 2.13 (1.19-3.81)    | 3.15E-01                         | 1.22E-02         | 1.65E-01   |
| rs4602840  | DDC         | 7   | 50,530,315  | 0.13             | Dom                        | 1.83 (1.08-3.11)           | 1.4 (0.83-2.36)      | 4.36 (1.73-11.03)   | 3.62E-02                         | 8.42E-03         | 1.66E-01   |
| rs2238687  | FOSB        | 19  | 50,665,006  | 0.13             | Add                        | 1.72 (1.1-2.71)            | 1.51 (0.89-2.57)     | 2.58 (1.18-5.65)    | 2.51E-01                         | 2.67E-02         | 1.78E-01   |
| rs7569963  | CREB1       | 2   | 208,181,429 | 0.29             | Add                        | 0.69 (0.47-1.01)           | 1.31 (0.73-2.36)     | 2.3 (1.26-4.2)      | 1.53E-01                         | 7.68E-02         | 1.82E-01   |
| rs2709402  | CREB1       | 2   | 208,129,222 | 0.18             | Dom                        | 1.7 (1.07-2.71)            | 2.32 (1.28-4.19)     | 1.18 (0.57-2.41)    | 1.53E-01                         | 3.76E-02         | 1.84E-01   |
| rs1045780  | CREB1       | 2   | 208,175,395 | 0.18             | Dom                        | 1.68 (1.06-2.67)           | 2.32 (1.28-4.19)     | 1.15 (0.56-2.36)    | 1.40E-01                         | 3.95E-02         | 1.92E-01   |
| rs2551642  | CREB1       | 2   | 208,121,742 | 0.18             | Dom                        | 1.68 (1.06-2.67)           | 2.32 (1.28-4.19)     | 1.15 (0.56-2.36)    | 1.40E-01                         | 3.95E-02         | 1.92E-01   |
| rs1806584  | CREB1       | 2   | 208,174,515 | 0.18             | Dom                        | 1.68 (1.06-2.67)           | 2.32 (1.28-4.19)     | 1.15 (0.56-2.36)    | 1.40E-01                         | 3.95E-02         | 1.92E-01   |
| rs2551928  | CREB1       | 2   | 208,174,023 | 0.19             | Dom                        | 1.61 (1.02-2.55)           | 2.31 (1.28-4.18)     | 1.16 (0.57-2.35)    | 1.42E-01                         | 5.84E-02         | 1.92E-01   |
| rs2551921  | CREB1       | 2   | 208,143,800 | 0.18             | Dom                        | 1.68 (1.06-2.67)           | 2.32 (1.28-4.19)     | 1.15 (0.56-2.36)    | 1.40E-01                         | 3.95E-02         | 1.92E-01   |
| rs265974   | DRD1        | 5   | 174,793,846 | 0.33             | Dom                        | 0.56 (0.36-0.88)           | 2.28 (1.2-4.32)      | 1.34 (0.71-2.56)    | 2.56E-01                         | 1.54E-02         | 1.95E-01   |
| rs12373400 | ADCYAP1     | 18  | 913,096     | 0.38             | Dom                        | 0.57 (0.36-0.91)           | 2.81 (1.38-5.71)     | 1.33 (0.74-2.39)    | 1.11E-01                         | 1.24E-02         | 1.99E-01   |
| rs2551923  | CREB1       | 2   | 208,150,021 | 0.18             | Dom                        | 1.66 (1.05-2.65)           | 2.32 (1.28-4.18)     | 1.24 (0.6-2.56)     | 1.91E-01                         | 5.64E-02         | 1.99E-01   |
| rs3766927  | CHRNA2      | 1   | 152,830,765 | 0.30             | Dom                        | 0.55 (0.35-0.87)           | 1.5 (0.82-2.74)      | 2.1 (1.05-4.21)     | 4.76E-01                         | 3.32E-02         | 2.07E-01   |
| rs1519097  | DRD5        | 4   | 9,411,951   | 0.32             | Add                        | 1.35 (0.85-2.15)           | 1.15 (0.61-2.19)     | 2.17 (1.29-3.65)    | 7.10E-02                         | 6.44E-02         | 2.16E-01   |
| rs934778   | POMC        | 2   | 25,242,728  | 0.33             | Dom                        | 1.46 (0.92-2.3)            | 1.03 (0.52-2.06)     | 2.62 (1.43-4.8)     | 4.67E-02                         | 2.52E-02         | 2.17E-01   |
| rs9475210  | HCRTR2      | 6   | 55,210,529  | 0.06             | Add                        | 0.62 (0.22-1.75)           | 1.4 (0.87-2.25)      | 17.17 (2.09-141.28) | 2.26E-02                         | 1.20E-02         | 2.18E-01   |
| rs1127314  | CHRNA2      | 1   | 152,822,890 | 0.30             | Dom                        | 0.62 (0.43-0.89)           | 1.51 (0.83-2.75)     | 2.09 (1.04-4.19)    | 3.56E-01                         | 2.62E-02         | 2.19E-01   |
| rs2551931  | CREB1       | 2   | 208,179,725 | 0.18             | Dom                        | 1.64 (1.03-2.61)           | 2.36 (1.3-4.27)      | 1.15 (0.56-2.36)    | 1.31E-01                         | 4.67E-02         | 2.20E-01   |
| rs6702335  | EPB41       | 1   | 29,283,837  | 0.38             | Add                        | 0.64 (0.46-0.89)           | 2.12 (1.11-4.06)     | 1.57 (0.95-2.6)     | 3.89E-01                         | 1.29E-02         | 2.23E-01   |
| rs2709371  | CREB1       | 2   | 208,092,932 | 0.19             | Add                        | 1.52 (1.03-2.23)           | 2.18 (1.23-3.86)     | 1.34 (0.72-2.5)     | 2.22E-01                         | 6.58E-02         | 2.35E-01   |

**Supplemental Table 1: SNP-Specific Results for Abstinence Rates at End of Treatment**

| SNP        | Gene    | Chr | Position    | MAF <sup>a</sup> | Genetic Model <sup>b</sup> | SNP Odds Ratio<br>(95% CI) | Treatment Odds Ratio |                   | Test of Interaction <sup>c</sup> | LRT <sup>d</sup> |            |
|------------|---------|-----|-------------|------------------|----------------------------|----------------------------|----------------------|-------------------|----------------------------------|------------------|------------|
|            |         |     |             |                  |                            |                            | WT (95% CI)          | Variant (95% CI)  |                                  | Observed P       | Adjusted P |
| rs11663172 | ADCYAP1 | 18  | 910,173     | 0.39             | Dom                        | 0.6 (0.38-0.96)            | 2.96 (1.43-6.09)     | 1.3 (0.73-2.33)   | 8.32E-02                         | 1.54E-02         | 2.38E-01   |
| rs2253206  | CREB1   | 2   | 208,100,223 | 0.48             | Dom                        | 0.57 (0.35-0.92)           | 1.2 (0.55-2.62)      | 2.13 (1.21-3.72)  | 2.43E-01                         | 4.74E-02         | 2.41E-01   |
| rs6977868  | PRKAR2B | 7   | 106,577,791 | 0.18             | Dom                        | 1.11 (0.67-1.83)           | 1.16 (0.67-1.99)     | 4.44 (1.88-10.49) | 9.41E-03                         | 1.88E-02         | 2.52E-01   |
| rs2131902  | CHRNA2  | 1   | 152,826,222 | 0.31             | Add                        | 0.65 (0.45-0.93)           | 1.45 (0.8-2.6)       | 2.07 (1.16-3.67)  | 3.36E-01                         | 4.40E-02         | 2.61E-01   |
| rs1310277  | DRD1    | 5   | 174,786,176 | 0.13             | Add                        | 0.73 (0.45-1.21)           | 2.34 (1.4-3.92)      | 0.74 (0.31-1.77)  | 2.28E-02                         | 2.34E-02         | 2.64E-01   |
| rs3811450  | CHRNA2  | 1   | 152,817,656 | 0.08             | Dom                        | 0.41 (0.18-0.92)           | 1.66 (1.03-2.67)     | 4.03 (0.78-20.79) | 3.21E-01                         | 4.68E-02         | 2.67E-01   |
| rs880028   | DDC     | 7   | 50,537,630  | 0.21             | Add                        | 1.36 (0.85-2.18)           | 1.2 (0.69-2.11)      | 3.2 (1.66-6.16)   | 1.73E-02                         | 1.60E-02         | 2.68E-01   |
| rs1127313  | CHRNA2  | 1   | 152,823,049 | 0.47             | Dom                        | 1.84 (1.02-3.31)           | 4.27 (1.43-12.76)    | 1.41 (0.85-2.33)  | 7.16E-02                         | 3.25E-02         | 2.76E-01   |
| rs11665625 | ADCYAP1 | 18  | 890,332     | 0.46             | Add                        | 1.55 (1.12-2.15)           | 2.72 (1.19-6.23)     | 1.85 (1.17-2.94)  | 2.53E-01                         | 1.93E-02         | 2.81E-01   |
| rs2565055  | CHRNA2  | 8   | 27,393,297  | 0.24             | Dom                        | 1.76 (1.12-2.77)           | 1.57 (0.83-2.95)     | 2.25 (1.17-4.32)  | 4.37E-01                         | 2.78E-02         | 2.85E-01   |
| rs1877032  | PPP1R1B | 17  | 35,024,590  | 0.08             | Add                        | 0.5 (0.25-1.01)            | 2.03 (1.22-3.36)     | 1.03 (0.28-3.82)  | 3.44E-01                         | 6.31E-02         | 2.93E-01   |
| rs6558000  | CHRNA2  | 8   | 27,395,271  | 0.07             | Add                        | 0.45 (0.19-1.05)           | 1.48 (0.92-2.38)     | 7.32 (1.38-38.98) | 7.11E-02                         | 2.95E-02         | 2.93E-01   |
| rs871058   | CHRNA5  | 15  | 76,645,546  | 0.36             | Dom                        | 0.73 (0.47-1.16)           | 3.26 (1.61-6.59)     | 1.17 (0.65-2.11)  | 2.89E-02                         | 2.71E-02         | 2.95E-01   |
| rs3729876  | PRKAR2B | 7   | 106,574,188 | 0.18             | Dom                        | 1.04 (0.63-1.71)           | 1.16 (0.67-1.99)     | 4.37 (1.86-10.28) | 1.00E-02                         | 2.48E-02         | 3.07E-01   |
| rs257387   | PRKAR2B | 7   | 106,595,716 | 0.18             | Dom                        | 1.09 (0.66-1.79)           | 1.17 (0.68-2.01)     | 4.3 (1.82-10.16)  | 1.19E-02                         | 2.56E-02         | 3.14E-01   |
| rs2878125  | TDO2    | 4   | 157,053,811 | 0.12             | Add                        | 1.55 (0.98-2.45)           | 1.49 (0.89-2.5)      | 2.79 (1.22-6.35)  | 1.90E-01                         | 4.57E-02         | 3.18E-01   |
| rs10932201 | CREB1   | 2   | 208,134,502 | 0.46             | Dom                        | 1.42 (0.83-2.42)           | 3.09 (1.18-8.06)     | 1.49 (0.89-2.5)   | 1.91E-01                         | 2.32E-01         | 3.21E-01   |
| rs17152020 | DDC     | 7   | 50,517,353  | 0.21             | Add                        | 1.22 (0.83-1.8)            | 1.18 (0.68-2.06)     | 2.96 (1.56-5.63)  | 2.03E-02                         | 2.93E-02         | 3.25E-01   |
| rs12021667 | EPB41   | 1   | 29,183,661  | 0.39             | Add                        | 0.64 (0.46-0.9)            | 1.95 (1.02-3.73)     | 1.65 (1-2.72)     | 6.34E-01                         | 2.16E-02         | 3.27E-01   |
| rs2985344  | EPB41   | 1   | 29,176,902  | 0.29             | Add                        | 1.54 (1.1-2.14)            | 1.52 (0.81-2.86)     | 1.99 (1.2-3.3)    | 4.31E-01                         | 2.34E-02         | 3.32E-01   |
| rs150085   | EPB41   | 1   | 29,120,374  | 0.29             | Add                        | 1.54 (1.1-2.14)            | 1.52 (0.81-2.86)     | 1.99 (1.2-3.3)    | 4.31E-01                         | 2.34E-02         | 3.32E-01   |
| rs203277   | EPB41   | 1   | 29,107,918  | 0.29             | Add                        | 1.54 (1.1-2.14)            | 1.52 (0.81-2.86)     | 1.99 (1.2-3.3)    | 4.31E-01                         | 2.34E-02         | 3.32E-01   |
| rs2762682  | EPB41   | 1   | 29,182,405  | 0.29             | Add                        | 1.54 (1.1-2.14)            | 1.52 (0.81-2.86)     | 1.99 (1.2-3.3)    | 4.31E-01                         | 2.34E-02         | 3.33E-01   |
| rs265976   | DRD1    | 5   | 174,795,026 | 0.18             | Dom                        | 0.49 (0.29-0.84)           | 1.69 (1-2.85)        | 2.43 (0.94-6.31)  | 5.09E-01                         | 2.58E-02         | 3.37E-01   |
| rs11767623 | PRKAR2B | 7   | 106,579,568 | 0.18             | Dom                        | 1.06 (0.64-1.74)           | 1.17 (0.68-2.01)     | 4.26 (1.81-10.04) | 1.24E-02                         | 2.91E-02         | 3.41E-01   |
| rs11575321 | DDC     | 7   | 50,572,601  | 0.10             | Dom                        | 1.65 (0.92-2.96)           | 1.43 (0.86-2.36)     | 4.94 (1.72-14.19) | 3.74E-02                         | 2.40E-02         | 3.42E-01   |
| rs11575313 | DDC     | 7   | 50,573,662  | 0.10             | Dom                        | 1.65 (0.92-2.96)           | 1.43 (0.86-2.36)     | 4.94 (1.72-14.19) | 3.74E-02                         | 2.40E-02         | 3.42E-01   |
| rs12027267 | EPB41   | 1   | 29,251,462  | 0.39             | Add                        | 0.65 (0.47-0.91)           | 2.02 (1.05-3.89)     | 1.61 (0.98-2.64)  | 5.08E-01                         | 2.35E-02         | 3.43E-01   |
| rs2303933  | CDK5    | 7   | 150,397,732 | 0.43             | Dom                        | 1.8 (1.08-2.99)            | 1.29 (0.54-3.09)     | 1.99 (1.17-3.38)  | 4.04E-01                         | 3.68E-02         | 3.44E-01   |
| rs12280580 | DRD4    | 11  | 616,220     | 0.27             | Add                        | 1.06 (0.74-1.52)           | 1.11 (0.61-2.01)     | 2.64 (1.5-4.65)   | 1.96E-02                         | 5.14E-02         | 3.46E-01   |
| rs13106539 | DRD5    | 4   | 9,406,801   | 0.37             | Dom                        | 1.23 (0.78-1.96)           | 1.04 (0.51-2.15)     | 2.43 (1.35-4.35)  | 7.57E-02                         | 1.19E-01         | 3.49E-01   |
| rs3775085  | TDO2    | 4   | 157,042,829 | 0.10             | Dom                        | 1.07 (0.58-1.97)           | 1.39 (0.85-2.28)     | 5.33 (1.68-16.91) | 3.64E-02                         | 7.68E-02         | 3.64E-01   |
| rs10033951 | DRD5    | 4   | 9,388,678   | 0.31             | Dom                        | 1.43 (0.91-2.25)           | 1.37 (0.7-2.68)      | 2.18 (1.18-4.04)  | 3.16E-01                         | 1.51E-01         | 3.66E-01   |
| rs7539745  | CHRNA2  | 1   | 152,793,038 | 0.14             | Add                        | 1.35 (0.89-2.05)           | 2.21 (1.3-3.78)      | 1.13 (0.55-2.32)  | 1.14E-01                         | 1.14E-01         | 3.74E-01   |
| rs1186675  | KCNJ9   | 1   | 158,305,708 | 0.12             | Add                        | 0.7 (0.4-1.24)             | 1.39 (0.84-2.29)     | 4.55 (1.55-13.29) | 4.79E-02                         | 9.27E-02         | 3.79E-01   |
| rs16956223 | CHRNA7  | 15  | 30,198,075  | 0.17             | Add                        | 0.53 (0.33-0.86)           | 1.84 (1.1-3.09)      | 1.57 (0.67-3.67)  | 7.47E-01                         | 2.00E-02         | 3.84E-01   |
| rs2867383  | DRD5    | 4   | 9,397,033   | 0.32             | Dom                        | 1.35 (0.86-2.13)           | 1.28 (0.65-2.52)     | 2.25 (1.22-4.13)  | 2.27E-01                         | 1.70E-01         | 3.89E-01   |
| rs7625282  | DRD3    | 3   | 115,364,217 | 0.25             | Add                        | 0.77 (0.53-1.12)           | 2.56 (1.43-4.58)     | 1.15 (0.63-2.08)  | 3.46E-02                         | 4.01E-02         | 3.91E-01   |
| rs7655090  | DRD5    | 4   | 9,374,973   | 0.32             | Dom                        | 1.43 (0.91-2.25)           | 1.44 (0.73-2.84)     | 2.05 (1.12-3.76)  | 4.43E-01                         | 1.94E-01         | 3.95E-01   |

**Supplemental Table 1: SNP-Specific Results for Abstinence Rates at End of Treatment**

| SNP        | Gene    | Chr | Position    | MAF <sup>a</sup> | Genetic Model <sup>b</sup> | SNP Odds Ratio<br>(95% CI) | Treatment Odds Ratio |                     | Test of Interaction <sup>c</sup> | LRT <sup>d</sup> |            |
|------------|---------|-----|-------------|------------------|----------------------------|----------------------------|----------------------|---------------------|----------------------------------|------------------|------------|
|            |         |     |             |                  |                            |                            | WT (95% CI)          | Variant (95% CI)    |                                  | Observed P       | Adjusted P |
| rs893541   | KLF16   | 19  | 1,809,183   | 0.19             | Add                        | 0.97 (0.61-1.54)           | 1.25 (0.73-2.15)     | 3.36 (1.52-7.44)    | 3.80E-02                         | 9.31E-02         | 3.95E-01   |
| rs11043016 | TH      | 11  | 2,162,603   | 0.26             | Dom                        | 1.65 (1.05-2.59)           | 1.36 (0.72-2.57)     | 2.29 (1.19-4.41)    | 2.65E-01                         | 3.67E-02         | 3.97E-01   |
| rs1392808  | CHRNA7  | 15  | 30,198,807  | 0.17             | Add                        | 0.54 (0.33-0.86)           | 1.84 (1.1-3.09)      | 1.55 (0.67-3.62)    | 7.30E-01                         | 2.11E-02         | 3.97E-01   |
| rs563649   | OPRM1   | 6   | 154,449,660 | 0.09             | Add                        | 0.89 (0.48-1.65)           | 1.36 (0.83-2.2)      | 6.61 (2.02-21.6)    | 1.39E-02                         | 2.87E-02         | 4.06E-01   |
| rs265977   | DRD1    | 5   | 174,795,863 | 0.17             | Dom                        | 0.5 (0.29-0.87)            | 1.7 (1.01-2.87)      | 2.1 (0.8-5.55)      | 7.11E-01                         | 3.56E-02         | 4.14E-01   |
| rs10914456 | HCRTR1  | 1   | 31,860,758  | 0.45             | Dom                        | 0.72 (0.43-1.21)           | 1.4 (0.6-3.27)       | 2.43 (1.33-4.42)    | 3.00E-01                         | 3.10E-01         | 4.17E-01   |
| rs204060   | EPB41   | 1   | 29,152,213  | 0.28             | Add                        | 1.51 (1.08-2.12)           | 1.53 (0.82-2.86)     | 2.02 (1.2-3.39)     | 4.25E-01                         | 3.36E-02         | 4.20E-01   |
| rs2472554  | CHRNA2  | 8   | 27,384,271  | 0.30             | Dom                        | 0.95 (0.6-1.49)            | 3.2 (1.64-6.23)      | 1.01 (0.54-1.89)    | 1.36E-02                         | 3.98E-02         | 4.29E-01   |
| rs806378   | CNR1    | 6   | 88,916,270  | 0.28             | Add                        | 0.96 (0.67-1.38)           | 1.08 (0.6-1.93)      | 2.77 (1.53-5)       | 1.09E-02                         | 3.22E-02         | 4.30E-01   |
| rs2741339  | CHRNA2  | 8   | 27,390,886  | 0.27             | Add                        | 1.53 (1.08-2.15)           | 1.68 (0.9-3.13)      | 1.98 (1.17-3.34)    | 6.42E-01                         | 4.03E-02         | 4.40E-01   |
| rs9607272  | MAPK1   | 22  | 20,466,398  | 0.25             | Dom                        | 0.83 (0.53-1.31)           | 2.62 (1.43-4.81)     | 1.02 (0.51-2.04)    | 4.53E-02                         | 8.06E-02         | 4.45E-01   |
| rs12130351 | EPB41   | 1   | 29,269,534  | 0.07             | Dom                        | 2.21 (1.19-4.09)           | 1.72 (1.05-2.81)     | 1.96 (0.62-6.13)    | 8.37E-01                         | 4.24E-02         | 4.48E-01   |
| rs2741335  | CHRNA2  | 8   | 27,393,708  | 0.27             | Dom                        | 1.59 (1.01-2.49)           | 1.38 (0.73-2.64)     | 2.44 (1.29-4.61)    | 2.22E-01                         | 4.62E-02         | 4.50E-01   |
| rs4275821  | CHRNA5  | 15  | 76,636,596  | 0.37             | Dom                        | 0.74 (0.47-1.17)           | 3.07 (1.49-6.3)      | 1.24 (0.69-2.21)    | 5.47E-02                         | 5.06E-02         | 4.54E-01   |
| rs6881740  | DRD1    | 5   | 174,791,768 | 0.37             | Add                        | 1.45 (1.05-1.99)           | 1.56 (0.78-3.11)     | 1.85 (1.16-2.96)    | 5.99E-01                         | 5.53E-02         | 4.56E-01   |
| rs10476156 | DRD1    | 5   | 174,795,276 | 0.14             | Add                        | 0.72 (0.44-1.16)           | 2.28 (1.35-3.84)     | 0.81 (0.35-1.88)    | 3.36E-02                         | 4.48E-02         | 4.59E-01   |
| rs10939515 | DRD5    | 4   | 9,382,394   | 0.18             | Dom                        | 1.33 (0.83-2.12)           | 2 (1.15-3.5)         | 1.34 (0.62-2.88)    | 4.02E-01                         | 3.94E-01         | 4.64E-01   |
| rs9635870  | ADCYAP1 | 18  | 890,765     | 0.29             | Add                        | 0.65 (0.46-0.92)           | 1.62 (0.92-2.86)     | 2.01 (1.1-3.69)     | 5.54E-01                         | 4.47E-02         | 4.65E-01   |
| rs12039988 | EPB41   | 1   | 29,298,420  | 0.39             | Add                        | 0.67 (0.48-0.94)           | 1.99 (1.04-3.83)     | 1.64 (1-2.69)       | 5.73E-01                         | 4.20E-02         | 4.65E-01   |
| rs9610375  | MAPK1   | 22  | 20,517,093  | 0.49             | Add                        | 0.58 (0.35-0.95)           | 2.25 (1.06-4.78)     | 1.75 (1.11-2.77)    | 7.02E-01                         | 7.87E-02         | 4.68E-01   |
| rs8006462  | CALM1   | 14  | 89,948,429  | 0.35             | Add                        | 1.61 (1.01-2.55)           | 1.52 (0.77-2.99)     | 1.99 (1.23-3.22)    | 5.01E-01                         | 8.16E-02         | 4.68E-01   |
| rs1800879  | NTRK1   | 1   | 155,104,765 | 0.36             | Add                        | 0.89 (0.64-1.25)           | 2.99 (1.53-5.85)     | 1.45 (0.89-2.35)    | 3.29E-02                         | 7.40E-02         | 4.70E-01   |
| rs11766415 | PRKAR2B | 7   | 106,496,001 | 0.43             | Add                        | 1.25 (0.91-1.71)           | 1 (0.48-2.04)        | 1.93 (1.22-3.06)    | 4.11E-02                         | 4.27E-02         | 4.75E-01   |
| rs806376   | CNR1    | 6   | 88,915,367  | 0.49             | Dom                        | 0.87 (0.52-1.45)           | 4.37 (1.79-10.63)    | 1.24 (0.73-2.11)    | 1.73E-02                         | 3.49E-02         | 4.76E-01   |
| rs3213718  | CALM1   | 14  | 89,939,666  | 0.44             | Dom                        | 1.67 (0.99-2.84)           | 2.7 (1.06-6.91)      | 1.62 (0.96-2.74)    | 3.50E-01                         | 1.27E-01         | 4.79E-01   |
| rs6517254  | CLIC6   | 21  | 35,002,160  | 0.38             | Dom                        | 0.57 (0.36-0.9)            | 1.73 (0.88-3.39)     | 1.97 (1.06-3.68)    | 7.77E-01                         | 5.21E-02         | 4.83E-01   |
| rs1866146  | POMC    | 2   | 25,234,077  | 0.34             | Add                        | 0.78 (0.56-1.1)            | 2.51 (1.32-4.75)     | 1.44 (0.87-2.4)     | 1.13E-01                         | 8.08E-02         | 4.83E-01   |
| rs11564752 | SLC6A3  | 5   | 1,497,985   | 0.06             | Dom                        | 0.84 (0.29-2.47)           | 1.44 (0.89-2.33)     | 14.14 (1.59-125.68) | 4.50E-02                         | 3.48E-02         | 5.07E-01   |
| rs599548   | OPRM1   | 6   | 154,460,254 | 0.14             | Add                        | 0.83 (0.49-1.4)            | 1.28 (0.77-2.13)     | 4.7 (1.78-12.38)    | 1.75E-02                         | 4.28E-02         | 5.11E-01   |
| rs2069443  | CDK5    | 7   | 150,386,106 | 0.25             | Add                        | 0.9 (0.62-1.3)             | 2.45 (1.36-4.42)     | 1.24 (0.68-2.23)    | 7.48E-02                         | 1.62E-01         | 5.11E-01   |
| rs1037351  | DDC     | 7   | 50,532,898  | 0.34             | Add                        | 1.12 (0.79-1.58)           | 1.02 (0.53-1.94)     | 2.29 (1.38-3.82)    | 2.15E-02                         | 4.31E-02         | 5.19E-01   |
| rs7543174  | CHRN2   | 1   | 152,794,296 | 0.16             | Add                        | 1.15 (0.77-1.73)           | 2.12 (1.24-3.62)     | 1.24 (0.62-2.48)    | 1.92E-01                         | 3.57E-01         | 5.20E-01   |
| rs6142512  | EPB41L1 | 20  | 34,178,851  | 0.17             | Dom                        | 0.75 (0.46-1.22)           | 2.19 (1.26-3.78)     | 1.08 (0.48-2.44)    | 1.62E-01                         | 1.63E-01         | 5.30E-01   |
| rs6142508  | EPB41L1 | 20  | 34,160,719  | 0.17             | Dom                        | 0.75 (0.46-1.22)           | 2.19 (1.26-3.78)     | 1.08 (0.48-2.44)    | 1.61E-01                         | 1.63E-01         | 5.35E-01   |
| rs3180694  | KCNJ9   | 1   | 158,328,008 | 0.12             | Dom                        | 0.61 (0.34-1.1)            | 1.55 (0.94-2.55)     | 3.29 (1.09-9.96)    | 2.25E-01                         | 1.58E-01         | 5.35E-01   |
| rs9616     | CHRN2   | 1   | 152,822,357 | 0.27             | Add                        | 1.36 (0.96-1.93)           | 2.08 (1.12-3.89)     | 1.53 (0.9-2.6)      | 3.93E-01                         | 1.93E-01         | 5.39E-01   |
| rs157220   | EPB41   | 1   | 29,083,883  | 0.38             | Add                        | 1.45 (1.06-1.98)           | 1.68 (0.84-3.37)     | 1.81 (1.14-2.89)    | 8.18E-01                         | 5.53E-02         | 5.40E-01   |
| rs9610470  | MAPK1   | 22  | 20,539,139  | 0.26             | Dom                        | 0.8 (0.51-1.26)            | 2.48 (1.34-4.58)     | 1.12 (0.57-2.2)     | 8.78E-02                         | 1.21E-01         | 5.48E-01   |
| rs2266966  | MAPK1   | 22  | 20,451,554  | 0.44             | Add                        | 0.74 (0.54-1.02)           | 2.07 (1.04-4.13)     | 1.7 (1.07-2.71)     | 5.40E-01                         | 1.34E-01         | 5.50E-01   |

**Supplemental Table 1: SNP-Specific Results for Abstinence Rates at End of Treatment**

| SNP        | Gene          | Chr | Position    | MAF <sup>a</sup> | Genetic Model <sup>b</sup> | SNP Odds Ratio<br>(95% CI) | Treatment Odds Ratio |                   | Test of Interaction <sup>c</sup> | LRT <sup>d</sup> |            |
|------------|---------------|-----|-------------|------------------|----------------------------|----------------------------|----------------------|-------------------|----------------------------------|------------------|------------|
|            |               |     |             |                  |                            |                            | WT (95% CI)          | Variant (95% CI)  |                                  | Observed P       | Adjusted P |
| rs2303928  | CDK5          | 7   | 150,370,263 | 0.40             | Add                        | 0.68 (0.49-0.96)           | 1.77 (0.91-3.41)     | 1.83 (1.11-3.02)  | 9.22E-01                         | 8.17E-02         | 5.54E-01   |
| rs2876981  | MAPK1         | 22  | 20,535,611  | 0.40             | Dom                        | 0.63 (0.4-0.99)            | 1.81 (0.89-3.66)     | 1.71 (0.95-3.08)  | 9.02E-01                         | 1.25E-01         | 5.55E-01   |
| rs2834586  | CLIC6         | 21  | 34,986,352  | 0.18             | Add                        | 0.69 (0.44-1.06)           | 2.13 (1.25-3.64)     | 1.17 (0.55-2.47)  | 1.80E-01                         | 7.66E-02         | 5.62E-01   |
| rs3753612  | HCRTR1        | 1   | 31,854,997  | 0.47             | Dom                        | 0.89 (0.53-1.5)            | 0.93 (0.39-2.23)     | 2.37 (1.35-4.16)  | 8.03E-02                         | 2.02E-01         | 5.63E-01   |
| rs12608148 | ADCYAP1       | 18  | 879,159     | 0.27             | Dom                        | 0.64 (0.41-1.01)           | 1.29 (0.71-2.33)     | 2.64 (1.3-5.35)   | 1.28E-01                         | 6.92E-02         | 5.68E-01   |
| rs2239316  | CREBBP        | 16  | 3,853,996   | 0.27             | Add                        | 0.94 (0.65-1.35)           | 2.75 (1.49-5.06)     | 1.18 (0.67-2.08)  | 2.48E-02                         | 7.04E-02         | 5.68E-01   |
| rs2069459  | CDK5          | 7   | 150,382,523 | 0.38             | Add                        | 1.04 (0.74-1.47)           | 1 (0.51-1.96)        | 2.1 (1.27-3.47)   | 3.63E-02                         | 9.78E-02         | 5.70E-01   |
| rs3788332  | MAPK1         | 22  | 20,501,567  | 0.46             | Add                        | 1.21 (0.88-1.66)           | 1.56 (0.74-3.31)     | 1.74 (1.11-2.73)  | 7.40E-01                         | 4.37E-01         | 5.71E-01   |
| rs12054220 | NCK1          | 3   | 138,160,271 | 0.49             | Add                        | 1.01 (0.74-1.37)           | 0.97 (0.46-2.05)     | 1.79 (1.13-2.83)  | 5.45E-02                         | 1.50E-01         | 5.74E-01   |
| rs2072659  | CHRN2         | 1   | 152,815,145 | 0.10             | Dom                        | 0.58 (0.28-1.18)           | 1.77 (1.07-2.92)     | 2.84 (0.71-11.36) | 5.30E-01                         | 2.76E-01         | 5.74E-01   |
| rs11101694 | CALCYON       | 10  | 134,996,704 | 0.14             | Add                        | 0.7 (0.41-1.21)            | 1.53 (0.91-2.59)     | 3.01 (1.13-7.97)  | 2.29E-01                         | 2.24E-01         | 5.75E-01   |
| rs3743078  | CHRNA3;CHRNA5 | 15  | 76,681,814  | 0.17             | Dom                        | 1.27 (0.83-1.94)           | 1.76 (1-3.08)        | 1.86 (0.87-3.99)  | 7.35E-01                         | 5.09E-01         | 5.81E-01   |
| rs4797325  | ADCYAP1       | 18  | 879,905     | 0.40             | Dom                        | 0.67 (0.48-0.94)           | 1.66 (0.8-3.41)      | 1.84 (1.01-3.35)  | 6.51E-01                         | 6.28E-02         | 5.81E-01   |
| rs1017112  | FREQ (NCS1)   | 9   | 131,976,625 | 0.17             | Add                        | 0.76 (0.48-1.2)            | 1.2 (0.71-2.03)      | 3.81 (1.7-8.58)   | 1.44E-02                         | 2.93E-02         | 5.82E-01   |
| rs2069454  | CDK5          | 7   | 150,383,915 | 0.14             | Add                        | 1.44 (0.92-2.25)           | 1.61 (0.94-2.77)     | 2.56 (1.18-5.59)  | 3.11E-01                         | 1.59E-01         | 5.83E-01   |
| rs806377   | CNR1          | 6   | 88,915,442  | 0.46             | Dom                        | 0.89 (0.54-1.47)           | 3.94 (1.69-9.18)     | 1.23 (0.72-2.12)  | 2.31E-02                         | 5.10E-02         | 5.88E-01   |
| rs4809549  | CHRNA4        | 20  | 61,472,553  | 0.46             | Add                        | 0.81 (0.58-1.11)           | 2.96 (1.4-6.22)      | 1.68 (1.06-2.66)  | 8.60E-02                         | 7.58E-02         | 5.90E-01   |
| rs11633223 | CHRN2         | 15  | 76,722,531  | 0.38             | Dom                        | 1.04 (0.65-1.67)           | 3.41 (1.61-7.21)     | 1.16 (0.66-2.06)  | 2.56E-02                         | 7.89E-02         | 5.93E-01   |
| rs2236610  | CLIC6         | 21  | 34,982,538  | 0.16             | Add                        | 0.65 (0.41-1.04)           | 1.98 (1.17-3.37)     | 1.21 (0.54-2.74)  | 3.03E-01                         | 8.68E-02         | 5.98E-01   |
| rs2283791  | MAPK1         | 22  | 20,460,945  | 0.44             | Add                        | 0.75 (0.55-1.03)           | 2.05 (1.03-4.09)     | 1.73 (1.08-2.76)  | 5.93E-01                         | 1.55E-01         | 6.03E-01   |
| rs10914457 | HCRTR1        | 1   | 31,866,848  | 0.40             | Add                        | 1 (0.71-1.41)              | 3.19 (1.51-6.75)     | 1.86 (1.14-3.04)  | 1.27E-01                         | 3.07E-01         | 6.04E-01   |
| rs707127   | NR4A2         | 2   | 156,877,056 | 0.36             | Dom                        | 0.64 (0.41-1)              | 1.93 (0.99-3.77)     | 1.71 (0.93-3.17)  | 7.94E-01                         | 1.37E-01         | 6.05E-01   |
| rs1063311  | MAPK1         | 22  | 20,446,467  | 0.44             | Add                        | 0.75 (0.54-1.03)           | 1.99 (1-3.98)        | 1.72 (1.08-2.74)  | 6.48E-01                         | 1.59E-01         | 6.08E-01   |
| rs13428823 | POMC          | 2   | 25,226,802  | 0.37             | Add                        | 0.75 (0.53-1.05)           | 2.27 (1.17-4.38)     | 1.57 (0.96-2.58)  | 2.96E-01                         | 1.18E-01         | 6.14E-01   |
| rs834830   | NR4A2         | 2   | 156,911,506 | 0.23             | Add                        | 0.86 (0.57-1.28)           | 1.28 (0.73-2.26)     | 2.68 (1.38-5.21)  | 7.92E-02                         | 1.84E-01         | 6.21E-01   |
| rs6592961  | DDC           | 7   | 50,540,384  | 0.22             | Dom                        | 1.35 (0.85-2.15)           | 1.31 (0.74-2.34)     | 2.9 (1.41-6)      | 9.39E-02                         | 8.52E-02         | 6.22E-01   |
| rs743409   | MAPK1         | 22  | 20,459,215  | 0.45             | Add                        | 1.23 (0.9-1.68)            | 1.45 (0.69-3.05)     | 1.76 (1.12-2.78)  | 5.49E-01                         | 3.25E-01         | 6.27E-01   |
| rs2186287  | CLIC6         | 21  | 34,990,935  | 0.34             | Dom                        | 0.6 (0.38-0.95)            | 1.8 (0.93-3.5)       | 1.79 (0.93-3.42)  | 9.89E-01                         | 9.29E-02         | 6.30E-01   |
| rs2834578  | CLIC6         | 21  | 34,981,479  | 0.41             | Dom                        | 1.31 (0.81-2.13)           | 3.38 (1.51-7.57)     | 1.24 (0.72-2.15)  | 4.51E-02                         | 8.62E-02         | 6.32E-01   |
| rs5320     | DBH           | 9   | 135,497,294 | 0.07             | Dom                        | 1.42 (0.72-2.81)           | 1.96 (1.18-3.26)     | 0.43 (0.12-1.52)  | 2.91E-02                         | 6.00E-02         | 6.38E-01   |
| rs7456339  | DDC           | 7   | 50,583,334  | 0.14             | Add                        | 1.14 (0.73-1.77)           | 1.38 (0.83-2.29)     | 3.47 (1.55-7.75)  | 4.39E-02                         | 9.24E-02         | 6.40E-01   |
| rs7524405  | HCRTR1        | 1   | 31,881,166  | 0.41             | Add                        | 0.79 (0.57-1.11)           | 1.36 (0.69-2.68)     | 1.92 (1.18-3.12)  | 3.14E-01                         | 2.78E-01         | 6.44E-01   |
| rs11043003 | TH            | 11  | 2,159,730   | 0.26             | Dom                        | 1.52 (0.97-2.39)           | 1.39 (0.75-2.57)     | 2.3 (1.18-4.5)    | 2.75E-01                         | 8.04E-02         | 6.45E-01   |
| rs1049353  | CNR1          | 6   | 88,910,354  | 0.26             | Add                        | 0.99 (0.69-1.42)           | 2.67 (1.48-4.83)     | 1.21 (0.68-2.12)  | 3.06E-02                         | 9.45E-02         | 6.47E-01   |
| rs3793336  | CDK5          | 7   | 150,393,804 | 0.15             | Add                        | 0.87 (0.49-1.54)           | 1.21 (0.66-2.24)     | 2.99 (1.08-8.31)  | 1.26E-01                         | 2.86E-01         | 6.50E-01   |
| rs10914453 | HCRTR1        | 1   | 31,847,623  | 0.40             | Dom                        | 0.86 (0.54-1.36)           | 1.42 (0.68-2.95)     | 2 (1.13-3.54)     | 4.71E-01                         | 6.51E-01         | 6.51E-01   |
| rs6141600  | EPB41L1       | 20  | 34,175,724  | 0.28             | Add                        | 0.76 (0.53-1.1)            | 1.94 (1.07-3.52)     | 1.48 (0.83-2.63)  | 4.70E-01                         | 2.35E-01         | 6.57E-01   |
| rs936461   | DRD4          | 11  | 626,496     | 0.35             | Add                        | 1.34 (0.95-1.89)           | 1.28 (0.63-2.59)     | 1.89 (1.15-3.09)  | 2.82E-01                         | 1.03E-01         | 6.59E-01   |
| rs8192595  | ADCYAP1       | 18  | 897,521     | 0.09             | Add                        | 0.81 (0.43-1.52)           | 1.64 (1.01-2.68)     | 2.6 (0.79-8.53)   | 4.85E-01                         | 6.60E-01         | 6.60E-01   |

**Supplemental Table 1: SNP-Specific Results for Abstinence Rates at End of Treatment**

| SNP        | Gene        | Chr | Position    | MAF <sup>a</sup> | Genetic Model <sup>b</sup> | SNP Odds Ratio<br>(95% CI) | Treatment Odds Ratio |                   | Test of Interaction <sup>c</sup> | LRT <sup>d</sup> |            |
|------------|-------------|-----|-------------|------------------|----------------------------|----------------------------|----------------------|-------------------|----------------------------------|------------------|------------|
|            |             |     |             |                  |                            |                            | WT (95% CI)          | Variant (95% CI)  |                                  | Observed P       | Adjusted P |
| rs919197   | GNAS        | 20  | 56,914,328  | 0.46             | Add                        | 1.49 (1.08-2.07)           | 2.36 (1.06-5.25)     | 1.83 (1.16-2.89)  | 4.44E-01                         | 4.18E-02         | 6.60E-01   |
| rs1474976  | EPB41L1     | 20  | 34,195,786  | 0.11             | Dom                        | 1.19 (0.68-2.07)           | 1.47 (0.88-2.43)     | 3.35 (1.22-9.22)  | 1.53E-01                         | 2.31E-01         | 6.63E-01   |
| rs1228814  | HTR1B       | 6   | 78,230,539  | 0.43             | Add                        | 1.31 (0.94-1.84)           | 1.08 (0.5-2.32)      | 1.93 (1.21-3.08)  | 9.03E-02                         | 5.74E-02         | 6.69E-01   |
| rs11954565 | DRD1        | 5   | 174,782,513 | 0.36             | Dom                        | 1.62 (1.02-2.59)           | 1.75 (0.82-3.74)     | 1.84 (1.05-3.24)  | 9.16E-01                         | 1.12E-01         | 6.70E-01   |
| rs835540   | DRD1        | 5   | 174,796,497 | 0.27             | Dom                        | 1.5 (0.95-2.35)            | 1.38 (0.75-2.51)     | 2.46 (1.23-4.92)  | 2.16E-01                         | 7.96E-02         | 6.71E-01   |
| rs12885713 | CALM1       | 14  | 89,933,110  | 0.46             | Dom                        | 1.55 (0.91-2.63)           | 2.61 (1.01-6.74)     | 1.58 (0.94-2.66)  | 3.63E-01                         | 2.17E-01         | 6.75E-01   |
| rs10064525 | SLC6A3      | 5   | 1,445,721   | 0.06             | Dom                        | 0.36 (0.13-1.06)           | 1.67 (1.04-2.67)     | 7.96 (0.9-70.72)  | 1.70E-01                         | 6.35E-02         | 6.78E-01   |
| rs12895068 | CALM1       | 14  | 89,957,031  | 0.07             | Add                        | 0.96 (0.54-1.7)            | 1.93 (1.19-3.12)     | 1.08 (0.37-3.2)   | 3.30E-01                         | 6.04E-01         | 6.80E-01   |
| rs4436578  | DRD2        | 11  | 112,811,975 | 0.12             | Add                        | 1.69 (1.09-2.63)           | 1.94 (1.15-3.26)     | 1.55 (0.72-3.35)  | 6.16E-01                         | 5.49E-02         | 6.83E-01   |
| rs2896135  | CALM1       | 14  | 89,950,493  | 0.42             | Add                        | 1.32 (0.97-1.8)            | 1.69 (0.81-3.5)      | 1.81 (1.15-2.85)  | 8.28E-01                         | 1.94E-01         | 6.83E-01   |
| rs4656874  | KCNJ9       | 1   | 158,311,246 | 0.31             | Add                        | 1.06 (0.75-1.5)            | 2.56 (1.34-4.87)     | 1.43 (0.86-2.38)  | 1.00E-01                         | 2.55E-01         | 6.84E-01   |
| rs2298432  | MAPK1       | 22  | 20,453,189  | 0.35             | Add                        | 1.1 (0.79-1.53)            | 1.29 (0.67-2.47)     | 1.96 (1.19-3.22)  | 2.20E-01                         | 3.21E-01         | 6.88E-01   |
| rs10042486 | HTR1A       | 5   | 63,297,085  | 0.50             | Add                        | 1.2 (0.87-1.63)            | 1.21 (0.55-2.65)     | 1.71 (1.09-2.69)  | 2.71E-01                         | 2.64E-01         | 6.88E-01   |
| rs13515    | MAPK1       | 22  | 20,445,886  | 0.19             | Add                        | 0.99 (0.66-1.49)           | 1.36 (0.79-2.34)     | 2.65 (1.34-5.26)  | 1.09E-01                         | 2.64E-01         | 6.88E-01   |
| rs6703093  | HCRTR1      | 1   | 31,866,148  | 0.49             | Dom                        | 1 (0.6-1.65)               | 0.92 (0.39-2.18)     | 2.25 (1.31-3.86)  | 8.52E-02                         | 2.26E-01         | 6.93E-01   |
| rs3814847  | CALM1       | 14  | 89,931,789  | 0.37             | Dom                        | 1.43 (0.89-2.29)           | 1.86 (0.86-4.03)     | 1.8 (1.03-3.15)   | 9.49E-01                         | 3.23E-01         | 6.94E-01   |
| rs6859392  | HTR1A       | 5   | 63,277,237  | 0.30             | Dom                        | 0.73 (0.47-1.15)           | 1.89 (1.02-3.49)     | 1.69 (0.87-3.31)  | 8.17E-01                         | 3.64E-01         | 6.95E-01   |
| rs11214613 | DRD2        | 11  | 112,840,469 | 0.09             | Add                        | 0.84 (0.45-1.56)           | 2.22 (1.35-3.65)     | 0.54 (0.17-1.68)  | 2.31E-02                         | 5.91E-02         | 6.96E-01   |
| rs8136867  | MAPK1       | 22  | 20,534,793  | 0.44             | Dom                        | 1.28 (0.79-2.09)           | 1.47 (0.64-3.34)     | 1.88 (1.1-3.22)   | 6.20E-01                         | 5.11E-01         | 6.96E-01   |
| rs6295     | HTR1A       | 5   | 63,294,321  | 0.50             | Add                        | 1.23 (0.89-1.68)           | 1.26 (0.57-2.82)     | 1.72 (1.09-2.72)  | 3.38E-01                         | 2.60E-01         | 6.97E-01   |
| rs10085024 | HTR1A       | 5   | 63,284,120  | 0.49             | Add                        | 1.18 (0.86-1.61)           | 1.18 (0.54-2.58)     | 1.73 (1.1-2.71)   | 2.33E-01                         | 2.61E-01         | 7.01E-01   |
| rs4789172  | GRB2        | 17  | 70,853,307  | 0.49             | Add                        | 1.33 (0.97-1.83)           | 2.57 (1.14-5.79)     | 1.75 (1.11-2.76)  | 2.46E-01                         | 1.41E-01         | 7.03E-01   |
| rs11081411 | ADCYAP1     | 18  | 883,205     | 0.16             | Dom                        | 0.81 (0.48-1.35)           | 2.03 (1.2-3.44)      | 1.31 (0.53-3.22)  | 4.12E-01                         | 4.60E-01         | 7.08E-01   |
| rs3787493  | GNAS        | 20  | 56,914,543  | 0.46             | Add                        | 1.47 (1.06-2.04)           | 2.49 (1.11-5.56)     | 1.82 (1.15-2.88)  | 3.47E-01                         | 4.83E-02         | 7.08E-01   |
| rs876259   | CALM1       | 14  | 89,952,709  | 0.07             | Add                        | 1 (0.56-1.8)               | 1.93 (1.19-3.13)     | 1.03 (0.34-3.1)   | 2.98E-01                         | 5.77E-01         | 7.09E-01   |
| rs1817074  | DDC         | 7   | 50,541,506  | 0.37             | Add                        | 1 (0.71-1.41)              | 1.01 (0.52-1.97)     | 2.18 (1.33-3.59)  | 2.95E-02                         | 8.32E-02         | 7.10E-01   |
| rs2471005  | DRD1        | 5   | 174,814,813 | 0.39             | Add                        | 0.77 (0.56-1.06)           | 1.31 (0.7-2.47)      | 2.03 (1.23-3.36)  | 1.82E-01                         | 1.34E-01         | 7.10E-01   |
| rs11723579 | TDO2        | 4   | 157,057,151 | 0.48             | Dom                        | 0.83 (0.5-1.38)            | 2.82 (1.17-6.78)     | 1.47 (0.87-2.49)  | 2.15E-01                         | 3.06E-01         | 7.11E-01   |
| rs3780711  | FREQ (NCS1) | 9   | 131,982,864 | 0.12             | Add                        | 0.74 (0.43-1.3)            | 1.31 (0.78-2.19)     | 4.85 (1.71-13.79) | 2.36E-02                         | 4.50E-02         | 7.13E-01   |
| rs2834590  | CLIC6       | 21  | 34,991,708  | 0.17             | Add                        | 1 (0.62-1.59)              | 1.33 (0.78-2.27)     | 3.18 (1.38-7.34)  | 8.10E-02                         | 1.77E-01         | 7.18E-01   |
| rs5755694  | MAPK1       | 22  | 20,530,530  | 0.44             | Dom                        | 1.27 (0.78-2.07)           | 1.51 (0.66-3.44)     | 1.86 (1.09-3.19)  | 6.78E-01                         | 5.61E-01         | 7.18E-01   |
| rs708905   | FOSB        | 19  | 50,669,312  | 0.13             | Add                        | 0.94 (0.57-1.55)           | 1.41 (0.85-2.34)     | 3.44 (1.39-8.55)  | 8.52E-02                         | 2.10E-01         | 7.19E-01   |
| rs1549760  | CDK5        | 7   | 150,386,772 | 0.21             | Dom                        | 1.19 (0.76-1.89)           | 2.41 (1.32-4.38)     | 1.14 (0.56-2.29)  | 1.12E-01                         | 2.32E-01         | 7.20E-01   |
| rs5999550  | MAPK1       | 22  | 20,481,286  | 0.46             | Add                        | 1.21 (0.88-1.66)           | 1.54 (0.73-3.25)     | 1.76 (1.12-2.76)  | 6.80E-01                         | 4.20E-01         | 7.23E-01   |
| rs11704205 | MAPK1       | 22  | 20,475,253  | 0.46             | Add                        | 1.21 (0.88-1.66)           | 1.54 (0.73-3.25)     | 1.76 (1.12-2.76)  | 6.80E-01                         | 4.20E-01         | 7.23E-01   |
| rs1892848  | MAPK1       | 22  | 20,516,562  | 0.46             | Add                        | 1.21 (0.88-1.66)           | 1.54 (0.73-3.25)     | 1.76 (1.12-2.76)  | 6.80E-01                         | 4.20E-01         | 7.23E-01   |
| rs17759598 | MAPK1       | 22  | 20,452,149  | 0.15             | Add                        | 0.77 (0.48-1.23)           | 1.48 (0.89-2.47)     | 2.75 (1.2-6.34)   | 1.97E-01                         | 2.62E-01         | 7.25E-01   |
| rs5871     | CALM1       | 14  | 89,941,231  | 0.07             | Add                        | 1.39 (0.8-2.44)            | 2 (1.22-3.27)        | 0.91 (0.32-2.54)  | 1.68E-01                         | 2.31E-01         | 7.30E-01   |
| rs2303937  | CDK5        | 7   | 150,399,719 | 0.45             | Dom                        | 1.55 (0.92-2.62)           | 2.01 (0.8-5.09)      | 1.68 (1-2.82)     | 7.41E-01                         | 2.40E-01         | 7.31E-01   |

**Supplemental Table 1: SNP-Specific Results for Abstinence Rates at End of Treatment**

| SNP        | Gene    | Chr | Position    | MAF <sup>a</sup> | Genetic Model <sup>b</sup> | SNP Odds Ratio<br>(95% CI) | Treatment Odds Ratio |                   | Test of Interaction <sup>c</sup> | LRT <sup>d</sup> |            |
|------------|---------|-----|-------------|------------------|----------------------------|----------------------------|----------------------|-------------------|----------------------------------|------------------|------------|
|            |         |     |             |                  |                            |                            | WT (95% CI)          | Variant (95% CI)  |                                  | Observed P       | Adjusted P |
| rs2164808  | POMC    | 2   | 25,230,680  | 0.41             | Add                        | 0.94 (0.68-1.3)            | 2.73 (1.35-5.5)      | 1.59 (0.99-2.53)  | 1.03E-01                         | 2.30E-01         | 7.33E-01   |
| rs10415949 | FOSB    | 19  | 50,654,639  | 0.24             | Dom                        | 0.82 (0.52-1.31)           | 1.49 (0.84-2.65)     | 2.33 (1.11-4.91)  | 3.53E-01                         | 5.03E-01         | 7.34E-01   |
| rs11739696 | DRD1    | 5   | 174,789,227 | 0.39             | Add                        | 1.33 (0.97-1.82)           | 1.5 (0.76-2.99)      | 1.85 (1.16-2.95)  | 5.15E-01                         | 1.46E-01         | 7.35E-01   |
| rs265973   | DRD1    | 5   | 174,793,305 | 0.44             | Add                        | 0.71 (0.51-0.98)           | 1.61 (0.82-3.19)     | 1.86 (1.15-2.99)  | 6.70E-01                         | 1.04E-01         | 7.37E-01   |
| rs7125415  | DRD2    | 11  | 112,815,891 | 0.09             | Dom                        | 1.72 (0.98-3.04)           | 2.1 (1.26-3.5)       | 0.92 (0.33-2.52)  | 1.52E-01                         | 6.85E-02         | 7.38E-01   |
| rs1860803  | PRKAR2B | 7   | 106,567,076 | 0.41             | Add                        | 0.82 (0.59-1.14)           | 2.81 (1.41-5.6)      | 1.59 (0.99-2.56)  | 9.35E-02                         | 9.93E-02         | 7.41E-01   |
| rs2304297  | CHRNA6  | 8   | 42,727,356  | 0.23             | Dom                        | 1.43 (0.91-2.24)           | 1.74 (0.95-3.19)     | 1.8 (0.91-3.55)   | 9.39E-01                         | 2.92E-01         | 7.43E-01   |
| rs2271537  | TDO2    | 4   | 157,049,273 | 0.49             | Add                        | 1.24 (0.87-1.78)           | 1.18 (0.5-2.82)      | 1.7 (1.05-2.74)   | 3.24E-01                         | 2.72E-01         | 7.45E-01   |
| rs10770141 | TH      | 11  | 2,150,416   | 0.39             | Dom                        | 1.58 (0.97-2.56)           | 1.32 (0.6-2.93)      | 2 (1.15-3.47)     | 4.03E-01                         | 1.05E-01         | 7.47E-01   |
| rs835634   | NCK1    | 3   | 138,158,993 | 0.41             | Add                        | 1.03 (0.75-1.42)           | 2.98 (1.44-6.14)     | 1.62 (1.02-2.58)  | 6.41E-02                         | 1.77E-01         | 7.50E-01   |
| rs717099   | PRKAR2B | 7   | 106,528,174 | 0.46             | Add                        | 0.95 (0.7-1.29)            | 3.28 (1.57-6.85)     | 1.69 (1.08-2.67)  | 3.82E-02                         | 1.01E-01         | 7.50E-01   |
| rs324029   | DRD3    | 3   | 115,364,313 | 0.29             | Add                        | 0.87 (0.61-1.24)           | 2.56 (1.39-4.69)     | 1.29 (0.75-2.24)  | 5.74E-02                         | 1.23E-01         | 7.51E-01   |
| rs3801969  | PRKAR2B | 7   | 106,498,728 | 0.45             | Add                        | 1.29 (0.94-1.78)           | 1.26 (0.59-2.69)     | 1.81 (1.15-2.84)  | 2.76E-01                         | 1.54E-01         | 7.54E-01   |
| rs891507   | CDK5    | 7   | 150,382,999 | 0.15             | Dom                        | 0.73 (0.43-1.25)           | 1.73 (1.01-2.96)     | 1.94 (0.76-4.96)  | 8.34E-01                         | 5.09E-01         | 7.55E-01   |
| rs7546297  | HCRTR1  | 1   | 31,879,081  | 0.41             | Add                        | 0.87 (0.63-1.21)           | 1.38 (0.7-2.72)      | 1.9 (1.18-3.08)   | 3.47E-01                         | 5.09E-01         | 7.55E-01   |
| rs10798880 | HCRTR1  | 1   | 31,869,675  | 0.41             | Add                        | 0.85 (0.61-1.18)           | 1.33 (0.67-2.64)     | 1.92 (1.19-3.1)   | 2.88E-01                         | 4.11E-01         | 7.56E-01   |
| rs403636   | SLC6A3  | 5   | 1,491,354   | 0.17             | Dom                        | 1.69 (1.06-2.7)            | 2.05 (1.15-3.65)     | 1.46 (0.69-3.07)  | 4.76E-01                         | 8.01E-02         | 7.58E-01   |
| rs3776511  | SLC6A3  | 5   | 1,460,129   | 0.21             | Dom                        | 1.71 (1.07-2.73)           | 1.86 (1.01-3.46)     | 1.72 (0.84-3.5)   | 8.65E-01                         | 7.82E-02         | 7.58E-01   |
| rs126014   | EPB41   | 1   | 29,092,765  | 0.38             | Add                        | 1.39 (1.02-1.91)           | 1.73 (0.85-3.51)     | 1.83 (1.15-2.93)  | 8.56E-01                         | 1.07E-01         | 7.58E-01   |
| rs4938012  | ANKK1   | 11  | 112,764,864 | 0.34             | Dom                        | 0.63 (0.4-0.98)            | 2.19 (1.13-4.23)     | 1.43 (0.77-2.67)  | 3.60E-01                         | 6.54E-02         | 7.60E-01   |
| rs2644596  | NTRK1   | 1   | 155,118,938 | 0.20             | Add                        | 1 (0.67-1.49)              | 1.99 (1.13-3.5)      | 1.47 (0.77-2.82)  | 4.62E-01                         | 7.60E-01         | 7.60E-01   |
| rs7281040  | CLIC6   | 21  | 34,978,271  | 0.20             | Add                        | 0.7 (0.47-1.06)            | 1.94 (1.13-3.34)     | 1.47 (0.73-2.95)  | 5.12E-01                         | 1.65E-01         | 7.60E-01   |
| rs9892427  | PPP1R1B | 17  | 35,058,384  | 0.08             | Add                        | 0.72 (0.38-1.36)           | 1.94 (1.19-3.15)     | 0.95 (0.29-3.1)   | 2.73E-01                         | 3.24E-01         | 7.61E-01   |
| rs7123797  | ANKK1   | 11  | 112,767,781 | 0.36             | Dom                        | 0.63 (0.4-0.98)            | 2.19 (1.13-4.23)     | 1.43 (0.77-2.67)  | 3.60E-01                         | 6.54E-02         | 7.62E-01   |
| rs6454673  | CNR1    | 6   | 88,927,768  | 0.31             | Add                        | 0.97 (0.69-1.37)           | 1.12 (0.62-2.05)     | 2.36 (1.37-4.05)  | 3.54E-02                         | 1.00E-01         | 7.62E-01   |
| rs2070367  | CLIC6   | 21  | 35,001,362  | 0.20             | Dom                        | 0.62 (0.38-1.01)           | 1.76 (1.03-3.02)     | 1.82 (0.79-4.19)  | 9.51E-01                         | 1.46E-01         | 7.62E-01   |
| rs324022   | DRD3    | 3   | 115,369,988 | 0.29             | Dom                        | 0.8 (0.51-1.26)            | 2.44 (1.3-4.56)      | 1.21 (0.63-2.32)  | 1.29E-01                         | 1.70E-01         | 7.63E-01   |
| rs167770   | DRD3    | 3   | 115,362,252 | 0.28             | Add                        | 0.88 (0.62-1.25)           | 2.54 (1.39-4.66)     | 1.29 (0.74-2.23)  | 5.83E-02                         | 1.31E-01         | 7.65E-01   |
| rs1599789  | ADCYAP1 | 18  | 881,312     | 0.26             | Add                        | 0.69 (0.47-1.02)           | 1.95 (1.09-3.48)     | 1.65 (0.89-3.05)  | 6.69E-01                         | 1.24E-01         | 7.66E-01   |
| rs267417   | DRD1    | 5   | 174,813,120 | 0.39             | Dom                        | 0.71 (0.45-1.13)           | 1.2 (0.61-2.35)      | 2.5 (1.34-4.66)   | 1.16E-01                         | 1.21E-01         | 7.69E-01   |
| rs9624019  | GNAZ    | 22  | 21,737,301  | 0.10             | Add                        | 1.13 (0.63-2.05)           | 1.42 (0.86-2.34)     | 3.96 (1.29-12.18) | 9.80E-02                         | 1.27E-01         | 7.72E-01   |
| rs6501775  | GRB2    | 17  | 70,822,168  | 0.05             | Dom                        | 0.78 (0.35-1.71)           | 2.03 (1.25-3.29)     | 0.57 (0.12-2.66)  | 1.03E-01                         | 2.36E-01         | 7.73E-01   |
| rs2292536  | TDO2    | 4   | 157,059,101 | 0.47             | Dom                        | 1.4 (0.84-2.33)            | 2.74 (1.12-6.67)     | 1.51 (0.9-2.56)   | 2.61E-01                         | 2.66E-01         | 7.73E-01   |
| rs10853372 | ADCYAP1 | 18  | 913,261     | 0.41             | Dom                        | 1.42 (0.85-2.38)           | 2.3 (0.94-5.63)      | 1.67 (0.98-2.84)  | 5.46E-01                         | 3.75E-01         | 7.74E-01   |
| rs2834587  | CLIC6   | 21  | 34,986,503  | 0.34             | Dom                        | 0.64 (0.41-1)              | 1.77 (0.92-3.42)     | 1.88 (1-3.55)     | 8.97E-01                         | 1.49E-01         | 7.74E-01   |
| rs2409531  | CLIC6   | 21  | 34,975,371  | 0.21             | Add                        | 0.7 (0.46-1.05)            | 1.94 (1.13-3.34)     | 1.5 (0.75-3)      | 5.37E-01                         | 1.59E-01         | 7.76E-01   |
| rs7281533  | CLIC6   | 21  | 34,969,460  | 0.21             | Add                        | 0.7 (0.46-1.05)            | 1.94 (1.13-3.34)     | 1.5 (0.75-3)      | 5.37E-01                         | 1.59E-01         | 7.76E-01   |
| rs10915216 | EPB41   | 1   | 29,229,250  | 0.49             | Add                        | 0.74 (0.54-1.01)           | 2.04 (0.97-4.29)     | 1.71 (1.09-2.7)   | 5.86E-01                         | 1.13E-01         | 7.76E-01   |
| rs2271933  | HCRTR1  | 1   | 31,865,112  | 0.43             | Dom                        | 0.77 (0.48-1.24)           | 1.23 (0.58-2.62)     | 2.28 (1.28-4.06)  | 2.05E-01                         | 2.82E-01         | 7.77E-01   |

**Supplemental Table 1: SNP-Specific Results for Abstinence Rates at End of Treatment**

| SNP        | Gene          | Chr | Position    | MAF <sup>a</sup> | Genetic Model <sup>b</sup> | SNP Odds Ratio<br>(95% CI) | Treatment Odds Ratio |                   | Test of Interaction <sup>c</sup> | LRT <sup>d</sup> |            |
|------------|---------------|-----|-------------|------------------|----------------------------|----------------------------|----------------------|-------------------|----------------------------------|------------------|------------|
|            |               |     |             |                  |                            |                            | WT (95% CI)          | Variant (95% CI)  |                                  | Observed P       | Adjusted P |
| rs4511641  | FOSB          | 19  | 50,685,408  | 0.44             | Dom                        | 1.16 (0.84-1.6)            | 1.39 (0.62-3.12)     | 1.96 (1.14-3.37)  | 8.67E-01                         | 6.26E-01         | 7.77E-01   |
| rs12705406 | PRKAR2B       | 7   | 106,579,790 | 0.13             | Dom                        | 0.96 (0.55-1.68)           | 1.37 (0.83-2.29)     | 4.15 (1.49-11.57) | 5.89E-02                         | 1.41E-01         | 7.78E-01   |
| rs891398   | CHRNA2        | 8   | 27,380,739  | 0.48             | Add                        | 1.23 (0.88-1.71)           | 1.1 (0.49-2.46)      | 1.78 (1.14-2.8)   | 1.60E-01                         | 1.21E-01         | 7.81E-01   |
| rs17340577 | PRKAR2B       | 7   | 106,506,649 | 0.08             | Add                        | 0.74 (0.36-1.49)           | 1.49 (0.92-2.41)     | 5.01 (1.27-19.85) | 1.01E-01                         | 1.88E-01         | 7.81E-01   |
| rs4798767  | ADCYAP1       | 18  | 917,475     | 0.41             | Dom                        | 1.4 (0.84-2.33)            | 1.82 (0.76-4.36)     | 1.82 (1.07-3.09)  | 9.99E-01                         | 3.99E-01         | 7.83E-01   |
| rs6957586  | PRKAR2B       | 7   | 106,489,869 | 0.33             | Dom                        | 1.03 (0.66-1.62)           | 1.06 (0.54-2.08)     | 2.61 (1.41-4.81)  | 5.38E-02                         | 1.45E-01         | 7.83E-01   |
| rs4810147  | GNAS          | 20  | 56,855,022  | 0.46             | Dom                        | 1.45 (0.85-2.47)           | 4.08 (1.57-10.62)    | 1.33 (0.79-2.23)  | 4.31E-02                         | 6.57E-02         | 7.91E-01   |
| rs1316971  | CHRN4         | 15  | 76,717,565  | 0.17             | Add                        | 1.32 (0.88-1.98)           | 1.53 (0.89-2.62)     | 2.43 (1.22-4.84)  | 2.65E-01                         | 2.31E-01         | 7.91E-01   |
| rs1611123  | DBH           | 9   | 135,498,904 | 0.50             | Dom                        | 0.83 (0.49-1.39)           | 4.01 (1.61-9.96)     | 1.32 (0.78-2.22)  | 3.84E-02                         | 6.64E-02         | 7.91E-01   |
| rs968335   | HCRTR1        | 1   | 31,858,363  | 0.48             | Dom                        | 0.95 (0.58-1.57)           | 0.98 (0.42-2.31)     | 2.21 (1.29-3.8)   | 1.17E-01                         | 2.90E-01         | 7.93E-01   |
| rs12441998 | CHRN4         | 15  | 76,716,427  | 0.17             | Add                        | 1.33 (0.88-1.99)           | 1.54 (0.9-2.63)      | 2.41 (1.21-4.81)  | 2.78E-01                         | 2.30E-01         | 7.93E-01   |
| rs11659736 | ADCYAP1       | 18  | 905,937     | 0.36             | Dom                        | 0.78 (0.49-1.22)           | 2.64 (1.32-5.31)     | 1.32 (0.73-2.38)  | 1.36E-01                         | 1.50E-01         | 7.95E-01   |
| rs950776   | CHRN4         | 15  | 76,713,073  | 0.35             | Dom                        | 1.05 (0.66-1.66)           | 2.88 (1.42-5.81)     | 1.22 (0.67-2.19)  | 6.63E-02                         | 1.83E-01         | 7.95E-01   |
| rs2846579  | ADCYAP1       | 18  | 891,897     | 0.12             | Dom                        | 0.57 (0.31-1.04)           | 1.65 (1-2.72)        | 2.63 (0.86-8.06)  | 4.60E-01                         | 1.54E-01         | 7.96E-01   |
| rs3795955  | POMC          | 2   | 25,228,609  | 0.25             | Add                        | 0.8 (0.57-1.12)            | 2.1 (1.21-3.65)      | 1.48 (0.83-2.64)  | 3.12E-01                         | 2.29E-01         | 7.97E-01   |
| rs9044     | TDO2          | 4   | 157,065,537 | 0.50             | Dom                        | 0.83 (0.61-1.13)           | 2.08 (0.9-4.85)      | 1.64 (0.96-2.8)   | 8.37E-01                         | 4.83E-01         | 7.97E-01   |
| rs234628   | GNAS          | 20  | 56,919,006  | 0.43             | Add                        | 1.43 (1.03-1.98)           | 1.93 (0.9-4.13)      | 1.8 (1.14-2.84)   | 8.39E-01                         | 9.70E-02         | 7.97E-01   |
| rs11749035 | DRD1          | 5   | 174,815,658 | 0.16             | Add                        | 1.17 (0.76-1.8)            | 2.3 (1.34-3.97)      | 1.03 (0.5-2.12)   | 6.72E-02                         | 1.56E-01         | 8.00E-01   |
| rs2453737  | DRD1          | 5   | 174,791,508 | 0.39             | Dom                        | 1.54 (0.96-2.46)           | 1.49 (0.69-3.19)     | 1.96 (1.12-3.43)  | 5.66E-01                         | 1.36E-01         | 8.00E-01   |
| rs3743073  | CHRNA3;CHRN4  | 15  | 76,696,594  | 0.38             | Dom                        | 0.8 (0.51-1.27)            | 2.58 (1.26-5.29)     | 1.39 (0.78-2.49)  | 1.90E-01                         | 2.38E-01         | 8.01E-01   |
| rs806381   | CNR1          | 6   | 88,922,620  | 0.34             | Add                        | 0.96 (0.68-1.34)           | 1.08 (0.57-2.04)     | 2.21 (1.32-3.71)  | 4.03E-02                         | 1.15E-01         | 8.01E-01   |
| rs4654390  | EPB41         | 1   | 29,311,603  | 0.49             | Add                        | 0.75 (0.55-1.03)           | 2.12 (1.01-4.45)     | 1.71 (1.09-2.7)   | 5.16E-01                         | 1.23E-01         | 8.02E-01   |
| rs4522666  | CHRNA4        | 20  | 61,444,924  | 0.36             | Dom                        | 1.46 (0.91-2.34)           | 1.43 (0.66-3.09)     | 2.08 (1.19-3.64)  | 4.43E-01                         | 1.64E-01         | 8.02E-01   |
| rs1051730  | CHRNA3;CHRNA5 | 15  | 76,681,394  | 0.41             | Add                        | 0.87 (0.63-1.21)           | 1.3 (0.66-2.56)      | 1.93 (1.19-3.12)  | 2.37E-01                         | 3.92E-01         | 8.03E-01   |
| rs10806098 | HTR1B         | 6   | 78,232,728  | 0.28             | Dom                        | 0.62 (0.4-0.98)            | 1.93 (1.06-3.52)     | 1.54 (0.77-3.06)  | 6.31E-01                         | 9.48E-02         | 8.03E-01   |
| rs11700361 | EPB41L1       | 20  | 34,285,729  | 0.17             | Dom                        | 0.93 (0.58-1.51)           | 2.18 (1.26-3.79)     | 1.13 (0.51-2.51)  | 1.87E-01                         | 3.86E-01         | 8.04E-01   |
| rs938682   | CHRNA3        | 15  | 76,683,602  | 0.16             | Dom                        | 1.35 (0.84-2.16)           | 1.85 (1.06-3.23)     | 1.69 (0.78-3.66)  | 8.55E-01                         | 4.71E-01         | 8.05E-01   |
| rs17501755 | ADCYAP1       | 18  | 910,497     | 0.30             | Dom                        | 0.81 (0.52-1.27)           | 2.52 (1.33-4.77)     | 1.25 (0.66-2.36)  | 1.26E-01                         | 1.68E-01         | 8.05E-01   |
| rs17501915 | ADCYAP1       | 18  | 915,250     | 0.30             | Dom                        | 0.81 (0.52-1.27)           | 2.52 (1.33-4.77)     | 1.25 (0.66-2.36)  | 1.26E-01                         | 1.68E-01         | 8.05E-01   |
| rs637137   | CHRNA5        | 15  | 76,661,031  | 0.16             | Dom                        | 1.47 (0.92-2.36)           | 1.95 (1.1-3.44)      | 1.63 (0.76-3.47)  | 7.11E-01                         | 2.65E-01         | 8.05E-01   |
| rs2276469  | FOSB          | 19  | 50,666,433  | 0.45             | Dom                        | 0.67 (0.41-1.1)            | 1.3 (0.58-2.92)      | 1.82 (1.02-3.27)  | 5.08E-01                         | 2.48E-01         | 8.05E-01   |
| rs667282   | CHRNA5        | 15  | 76,650,527  | 0.16             | Dom                        | 1.47 (0.92-2.36)           | 1.95 (1.1-3.44)      | 1.63 (0.76-3.47)  | 7.11E-01                         | 2.65E-01         | 8.05E-01   |
| rs3743077  | CHRNA3;CHRNA5 | 15  | 76,681,951  | 0.39             | Dom                        | 0.82 (0.5-1.34)            | 2.71 (1.25-5.85)     | 1.28 (0.7-2.32)   | 1.31E-01                         | 2.02E-01         | 8.06E-01   |
| rs4838721  | CALCYON       | 10  | 135,010,940 | 0.19             | Add                        | 1.11 (0.73-1.67)           | 1.65 (0.95-2.87)     | 1.97 (1-3.89)     | 6.69E-01                         | 8.07E-01         | 8.07E-01   |
| rs11071530 | CHRNA7        | 15  | 30,147,264  | 0.10             | Add                        | 0.73 (0.4-1.36)            | 1.42 (0.87-2.3)      | 5.1 (1.57-16.59)  | 4.66E-02                         | 8.04E-02         | 8.08E-01   |
| rs1317286  | CHRNA3;CHRNA5 | 15  | 76,683,184  | 0.42             | Add                        | 0.91 (0.66-1.26)           | 1.26 (0.63-2.51)     | 1.87 (1.17-2.99)  | 2.28E-01                         | 4.46E-01         | 8.09E-01   |
| rs2036527  | CHRNA5        | 15  | 76,638,670  | 0.42             | Add                        | 0.86 (0.62-1.19)           | 1.31 (0.66-2.6)      | 1.89 (1.17-3.03)  | 2.78E-01                         | 4.12E-01         | 8.11E-01   |
| rs684513   | CHRNA5        | 15  | 76,645,455  | 0.14             | Dom                        | 1.53 (0.93-2.49)           | 1.93 (1.11-3.36)     | 1.75 (0.78-3.96)  | 8.49E-01                         | 2.43E-01         | 8.11E-01   |
| rs6495309  | CHRNA3;CHRN4  | 15  | 76,702,300  | 0.15             | Dom                        | 1.48 (0.92-2.39)           | 1.87 (1.08-3.27)     | 1.66 (0.76-3.63)  | 8.03E-01                         | 2.73E-01         | 8.12E-01   |

**Supplemental Table 1: SNP-Specific Results for Abstinence Rates at End of Treatment**

| SNP        | Gene          | Chr | Position    | MAF <sup>a</sup> | Genetic Model <sup>b</sup> | SNP Odds Ratio<br>(95% CI) | Treatment Odds Ratio |                  | Test of Interaction <sup>c</sup> | LRT <sup>d</sup> |            |
|------------|---------------|-----|-------------|------------------|----------------------------|----------------------------|----------------------|------------------|----------------------------------|------------------|------------|
|            |               |     |             |                  |                            |                            | WT (95% CI)          | Variant (95% CI) |                                  | Observed P       | Adjusted P |
| rs7589318  | POMC          | 2   | 25,231,876  | 0.28             | Add                        | 1.04 (0.66-1.62)           | 1.99 (1.09-3.64)     | 1.59 (0.93-2.71) | 3.95E-01                         | 6.95E-01         | 8.13E-01   |
| rs10244632 | DDC           | 7   | 50,566,197  | 0.27             | Add                        | 0.99 (0.69-1.42)           | 1.22 (0.67-2.22)     | 2.6 (1.44-4.69)  | 4.40E-02                         | 1.20E-01         | 8.13E-01   |
| rs3025388  | DBH           | 9   | 135,493,077 | 0.16             | Add                        | 0.82 (0.52-1.31)           | 2.45 (1.41-4.24)     | 0.92 (0.42-2.03) | 3.82E-02                         | 8.28E-02         | 8.14E-01   |
| rs11765015 | CDK5          | 7   | 150,401,765 | 0.26             | Add                        | 1.19 (0.76-1.86)           | 2.17 (1.2-3.94)      | 1.46 (0.84-2.56) | 3.03E-01                         | 4.75E-01         | 8.15E-01   |
| rs3819041  | CLIC6         | 21  | 35,003,496  | 0.42             | Dom                        | 1.19 (0.73-1.92)           | 3.07 (1.37-6.9)      | 1.33 (0.77-2.3)  | 9.30E-02                         | 2.09E-01         | 8.16E-01   |
| rs709050   | EPB41L1       | 20  | 34,292,023  | 0.20             | Dom                        | 0.82 (0.51-1.31)           | 2.02 (1.15-3.54)     | 1.34 (0.63-2.88) | 4.00E-01                         | 4.53E-01         | 8.17E-01   |
| rs11852956 | CHRNA7        | 15  | 30,190,622  | 0.23             | Add                        | 1.45 (1-2.09)              | 2.23 (1.22-4.07)     | 1.46 (0.82-2.58) | 2.60E-01                         | 7.89E-02         | 8.17E-01   |
| rs4364482  | HCRTR2        | 6   | 55,148,947  | 0.18             | Dom                        | 0.71 (0.43-1.18)           | 1.32 (0.77-2.26)     | 3.65 (1.51-8.83) | 5.42E-02                         | 8.78E-02         | 8.22E-01   |
| rs692780   | CHRNA5        | 15  | 76,663,560  | 0.37             | Dom                        | 0.79 (0.5-1.25)            | 2.5 (1.24-5.07)      | 1.42 (0.79-2.55) | 2.26E-01                         | 2.58E-01         | 8.22E-01   |
| rs6495307  | CHRNA3;CHRNA5 | 15  | 76,677,376  | 0.42             | Dom                        | 0.84 (0.52-1.35)           | 2.71 (1.25-5.88)     | 1.41 (0.81-2.46) | 1.78E-01                         | 2.71E-01         | 8.22E-01   |
| rs2000292  | HTR1B         | 6   | 78,223,664  | 0.28             | Dom                        | 0.61 (0.39-0.96)           | 1.63 (0.89-2.96)     | 1.97 (0.98-3.95) | 6.85E-01                         | 1.02E-01         | 8.23E-01   |
| rs1486009  | DRD3          | 3   | 115,371,222 | 0.06             | Add                        | 0.77 (0.37-1.6)            | 2.01 (1.24-3.24)     | 0.58 (0.15-2.24) | 8.75E-02                         | 1.84E-01         | 8.25E-01   |
| rs2040176  | ADCYAP1       | 18  | 882,467     | 0.12             | Dom                        | 0.58 (0.32-1.06)           | 1.64 (0.99-2.69)     | 2.7 (0.88-8.3)   | 4.25E-01                         | 1.70E-01         | 8.26E-01   |
| rs2292537  | TDO2          | 4   | 157,058,912 | 0.09             | Dom                        | 1.5 (0.86-2.63)            | 1.9 (1.15-3.15)      | 1.13 (0.41-3.09) | 3.64E-01                         | 3.04E-01         | 8.28E-01   |
| rs2846583  | ADCYAP1       | 18  | 892,965     | 0.28             | Dom                        | 0.68 (0.43-1.07)           | 1.47 (0.8-2.69)      | 2.2 (1.11-4.35)  | 3.89E-01                         | 1.94E-01         | 8.29E-01   |
| rs4947510  | DDC           | 7   | 50,492,914  | 0.29             | Add                        | 1.29 (0.93-1.8)            | 1.36 (0.74-2.5)      | 2.09 (1.24-3.52) | 2.08E-01                         | 1.28E-01         | 8.30E-01   |
| rs1609761  | KLF16         | 19  | 1,798,698   | 0.21             | Add                        | 0.86 (0.56-1.33)           | 1.53 (0.87-2.66)     | 2.46 (1.18-5.13) | 2.88E-01                         | 5.12E-01         | 8.32E-01   |
| rs3743075  | CHRNA3;CHRN4  | 15  | 76,696,507  | 0.37             | Dom                        | 0.81 (0.51-1.28)           | 2.74 (1.35-5.58)     | 1.33 (0.74-2.38) | 1.23E-01                         | 1.75E-01         | 8.36E-01   |
| rs555018   | CHRNA3;CHRNA5 | 15  | 76,666,297  | 0.42             | Dom                        | 0.82 (0.51-1.32)           | 2.67 (1.25-5.7)      | 1.42 (0.81-2.49) | 1.91E-01                         | 2.67E-01         | 8.39E-01   |
| rs129968   | CREBBP        | 16  | 3,731,262   | 0.35             | Dom                        | 0.95 (0.6-1.5)             | 1.48 (0.73-3.02)     | 1.94 (1.07-3.52) | 5.68E-01                         | 8.39E-01         | 8.39E-01   |
| rs7178270  | CHRNA3;CHRN4  | 15  | 76,708,132  | 0.40             | Dom                        | 1.14 (0.71-1.84)           | 3.14 (1.43-6.89)     | 1.28 (0.74-2.22) | 6.75E-02                         | 1.71E-01         | 8.40E-01   |
| rs11568817 | HTR1B         | 6   | 78,230,101  | 0.44             | Add                        | 1.26 (0.91-1.75)           | 1.09 (0.51-2.32)     | 1.83 (1.16-2.89) | 1.25E-01                         | 1.02E-01         | 8.40E-01   |
| rs3971872  | CHRN4         | 15  | 76,729,090  | 0.09             | Dom                        | 1.2 (0.67-2.14)            | 1.48 (0.9-2.44)      | 3.76 (1.3-10.86) | 1.19E-01                         | 2.13E-01         | 8.41E-01   |
| rs9656135  | PRKAR2B       | 7   | 106,555,592 | 0.08             | Add                        | 0.9 (0.5-1.61)             | 1.85 (1.14-3.01)     | 1.3 (0.43-3.9)   | 5.58E-01                         | 7.67E-01         | 8.41E-01   |
| rs578776   | CHRNA3;CHRNA5 | 15  | 76,675,455  | 0.21             | Add                        | 1.35 (0.9-2.01)            | 2 (1.11-3.62)        | 1.64 (0.88-3.07) | 6.29E-01                         | 3.07E-01         | 8.42E-01   |
| rs10227616 | PRKAR2B       | 7   | 106,462,434 | 0.33             | Dom                        | 1.02 (0.65-1.6)            | 1.09 (0.56-2.14)     | 2.56 (1.39-4.73) | 6.65E-02                         | 1.77E-01         | 8.43E-01   |
| rs7402321  | CHRNA7        | 15  | 30,207,700  | 0.38             | Add                        | 1.23 (0.87-1.73)           | 3.09 (1.47-6.5)      | 1.55 (0.95-2.53) | 5.10E-02                         | 8.12E-02         | 8.44E-01   |
| rs2369406  | KCNJ9         | 1   | 158,331,042 | 0.44             | Dom                        | 1.07 (0.78-1.47)           | 1.43 (0.65-3.17)     | 1.94 (1.12-3.35) | 5.10E-01                         | 6.97E-01         | 8.45E-01   |
| rs4665775  | POMC          | 2   | 25,260,625  | 0.21             | Dom                        | 0.73 (0.45-1.18)           | 1.77 (1.01-3.1)      | 1.62 (0.73-3.6)  | 8.54E-01                         | 3.91E-01         | 8.46E-01   |
| rs2746103  | EPB41L1       | 20  | 34,167,348  | 0.23             | Dom                        | 0.76 (0.48-1.2)            | 1.85 (1.04-3.3)      | 1.52 (0.74-3.16) | 6.80E-01                         | 4.33E-01         | 8.46E-01   |
| rs1948     | CHRNA3;CHRN4  | 15  | 76,704,454  | 0.35             | Dom                        | 0.77 (0.49-1.22)           | 2.59 (1.32-5.1)      | 1.35 (0.73-2.48) | 1.62E-01                         | 1.74E-01         | 8.46E-01   |
| rs4620755  | DRD2          | 11  | 112,814,829 | 0.11             | Dom                        | 1.59 (0.93-2.72)           | 2.08 (1.23-3.51)     | 1.1 (0.44-2.77)  | 2.41E-01                         | 1.22E-01         | 8.46E-01   |
| rs2644620  | NTRK1         | 1   | 155,127,792 | 0.11             | Add                        | 1.11 (0.67-1.84)           | 2.12 (1.26-3.55)     | 1 (0.41-2.44)    | 1.48E-01                         | 3.27E-01         | 8.47E-01   |
| rs3788339  | GNAZ          | 22  | 21,747,677  | 0.13             | Add                        | 1.4 (0.86-2.29)            | 1.52 (0.9-2.55)      | 2.38 (1-5.68)    | 3.76E-01                         | 1.87E-01         | 8.48E-01   |
| rs2846584  | ADCYAP1       | 18  | 894,054     | 0.28             | Dom                        | 0.72 (0.46-1.13)           | 1.49 (0.82-2.72)     | 2.17 (1.1-4.3)   | 4.19E-01                         | 2.94E-01         | 8.48E-01   |
| rs10423854 | FOSB          | 19  | 50,647,512  | 0.43             | Add                        | 0.84 (0.61-1.15)           | 1.5 (0.75-2.99)      | 1.78 (1.12-2.85) | 6.01E-01                         | 5.01E-01         | 8.49E-01   |
| rs647041   | CHRNA3;CHRNA5 | 15  | 76,667,536  | 0.42             | Dom                        | 0.79 (0.49-1.26)           | 2.38 (1.13-5.02)     | 1.51 (0.86-2.66) | 3.43E-01                         | 3.54E-01         | 8.51E-01   |
| rs5751583  | GNAZ          | 22  | 21,764,327  | 0.06             | Add                        | 0.9 (0.43-1.86)            | 2.04 (1.26-3.3)      | 0.54 (0.14-2.09) | 6.83E-02                         | 1.72E-01         | 8.51E-01   |
| rs6509214  | FOSB          | 19  | 50,673,655  | 0.34             | Dom                        | 0.79 (0.5-1.25)            | 1.37 (0.72-2.61)     | 2.37 (1.24-4.52) | 2.40E-01                         | 3.43E-01         | 8.52E-01   |



**Supplemental Table 1: SNP-Specific Results for Abstinence Rates at End of Treatment**

| SNP        | Gene          | Chr | Position    | MAF <sup>a</sup> | Genetic Model <sup>b</sup> | SNP Odds Ratio<br>(95% CI) | Treatment Odds Ratio |                  | Test of Interaction <sup>c</sup> | LRT <sup>d</sup> |            |
|------------|---------------|-----|-------------|------------------|----------------------------|----------------------------|----------------------|------------------|----------------------------------|------------------|------------|
|            |               |     |             |                  |                            |                            | WT (95% CI)          | Variant (95% CI) |                                  | Observed P       | Adjusted P |
| rs11088294 | CLIC6         | 21  | 35,020,213  | 0.25             | Dom                        | 0.89 (0.57-1.4)            | 1.66 (0.91-3)        | 1.92 (0.96-3.84) | 7.51E-01                         | 8.53E-01         | 8.53E-01   |
| rs11030101 | BDNF          | 11  | 27,637,320  | 0.48             | Dom                        | 0.96 (0.57-1.6)            | 1.42 (0.58-3.45)     | 1.89 (1.12-3.19) | 5.83E-01                         | 8.56E-01         | 8.56E-01   |
| rs6856354  | TDO2          | 4   | 157,068,548 | 0.35             | Add                        | 0.69 (0.44-1.08)           | 1.55 (0.82-2.91)     | 1.88 (1.13-3.15) | 6.34E-01                         | 2.59E-01         | 8.57E-01   |
| rs3735757  | CHRNA2        | 8   | 27,377,514  | 0.14             | Dom                        | 0.79 (0.47-1.35)           | 1.81 (1.08-3.05)     | 1.89 (0.74-4.82) | 9.38E-01                         | 6.83E-01         | 8.57E-01   |
| rs7778076  | PRKAR2B       | 7   | 106,510,244 | 0.09             | Add                        | 0.81 (0.43-1.51)           | 1.49 (0.92-2.43)     | 4.34 (1.3-14.52) | 1.05E-01                         | 2.25E-01         | 8.59E-01   |
| rs11644593 | CREBBP        | 16  | 3,811,287   | 0.10             | Add                        | 1.54 (0.92-2.58)           | 1.66 (1-2.76)        | 1.92 (0.75-4.9)  | 7.90E-01                         | 2.22E-01         | 8.59E-01   |
| rs601079   | CHRNA5        | 15  | 76,656,634  | 0.42             | Dom                        | 0.87 (0.54-1.41)           | 2.71 (1.25-5.89)     | 1.42 (0.82-2.47) | 1.83E-01                         | 3.20E-01         | 8.59E-01   |
| rs1401635  | BDNF          | 11  | 27,650,567  | 0.27             | Add                        | 1.34 (0.95-1.89)           | 1.71 (0.93-3.17)     | 1.76 (1.03-3)    | 9.42E-01                         | 2.44E-01         | 8.61E-01   |
| rs4867796  | DRD1          | 5   | 174,798,127 | 0.17             | Add                        | 1.28 (0.85-1.93)           | 2.21 (1.27-3.84)     | 1.17 (0.59-2.32) | 1.34E-01                         | 2.00E-01         | 8.61E-01   |
| rs610231   | OPRM1         | 6   | 154,420,170 | 0.12             | Add                        | 0.78 (0.47-1.29)           | 2.11 (1.28-3.5)      | 0.93 (0.37-2.35) | 1.18E-01                         | 1.28E-01         | 8.63E-01   |
| rs17115439 | ANKK1         | 11  | 112,769,482 | 0.35             | Dom                        | 0.64 (0.41-1)              | 2.09 (1.08-4.06)     | 1.5 (0.81-2.79)  | 4.76E-01                         | 9.47E-02         | 8.65E-01   |
| rs1878399  | CHRNA3;CHRNA4 | 15  | 76,699,058  | 0.42             | Dom                        | 0.87 (0.54-1.4)            | 2.67 (1.24-5.76)     | 1.46 (0.83-2.56) | 2.14E-01                         | 3.53E-01         | 8.66E-01   |
| rs1514248  | CHRNA7        | 15  | 30,164,975  | 0.13             | Dom                        | 0.73 (0.38-1.41)           | 1.4 (0.82-2.38)      | 5.4 (1.57-18.53) | 4.92E-02                         | 9.90E-02         | 8.67E-01   |
| rs4938015  | ANKK1         | 11  | 112,769,854 | 0.35             | Dom                        | 0.64 (0.41-1)              | 2.09 (1.08-4.05)     | 1.5 (0.81-2.78)  | 4.70E-01                         | 9.58E-02         | 8.67E-01   |
| rs1124492  | ANKK1         | 11  | 112,787,485 | 0.11             | Dom                        | 1.62 (0.95-2.76)           | 2.02 (1.19-3.42)     | 1.18 (0.47-2.98) | 3.25E-01                         | 1.34E-01         | 8.68E-01   |
| rs4938010  | ANKK1         | 11  | 112,750,776 | 0.15             | Add                        | 1.58 (1.03-2.42)           | 1.77 (1.03-3.03)     | 2 (0.98-4.09)    | 7.78E-01                         | 1.10E-01         | 8.72E-01   |
| rs7228988  | ADCYAP1       | 18  | 907,957     | 0.31             | Dom                        | 0.83 (0.53-1.29)           | 2.36 (1.24-4.49)     | 1.29 (0.68-2.43) | 1.88E-01                         | 2.60E-01         | 8.72E-01   |
| rs4656876  | KCNJ9         | 1   | 158,317,016 | 0.48             | Add                        | 0.91 (0.67-1.25)           | 2.06 (0.97-4.34)     | 1.74 (1.11-2.73) | 6.06E-01                         | 7.08E-01         | 8.73E-01   |
| rs4887069  | CHRNA3;CHRNA4 | 15  | 76,696,125  | 0.17             | Add                        | 1.25 (0.82-1.92)           | 2.04 (1.17-3.56)     | 1.38 (0.69-2.78) | 3.67E-01                         | 3.95E-01         | 8.75E-01   |
| rs514743   | CHRNA3;CHRNA5 | 15  | 76,671,282  | 0.37             | Dom                        | 0.8 (0.5-1.26)             | 2.38 (1.18-4.81)     | 1.46 (0.81-2.63) | 2.99E-01                         | 3.25E-01         | 8.76E-01   |
| rs2110113  | CALM1         | 14  | 89,922,506  | 0.12             | Add                        | 1.13 (0.69-1.83)           | 1.59 (0.96-2.64)     | 2.49 (1.03-5.99) | 3.76E-01                         | 5.50E-01         | 8.77E-01   |
| rs3761264  | GNAS          | 20  | 56,846,766  | 0.43             | Dom                        | 1.46 (0.87-2.44)           | 3.56 (1.43-8.85)     | 1.36 (0.8-2.3)   | 7.23E-02                         | 9.20E-02         | 8.79E-01   |
| rs1013402  | BDNF          | 11  | 27,668,957  | 0.27             | Add                        | 1.33 (0.94-1.88)           | 1.7 (0.92-3.14)      | 1.78 (1.04-3.03) | 9.04E-01                         | 2.60E-01         | 8.80E-01   |
| rs16891620 | CHRNA6        | 8   | 42,744,820  | 0.11             | Add                        | 0.87 (0.52-1.48)           | 1.75 (1.06-2.9)      | 1.74 (0.68-4.48) | 9.88E-01                         | 8.80E-01         | 8.80E-01   |
| rs11746641 | DRD1          | 5   | 174,798,697 | 0.16             | Add                        | 1.15 (0.75-1.78)           | 2.25 (1.3-3.88)      | 1.09 (0.53-2.25) | 1.02E-01                         | 2.24E-01         | 8.81E-01   |
| rs16840214 | NR4A2         | 2   | 156,875,018 | 0.21             | Dom                        | 0.7 (0.44-1.12)            | 1.72 (0.99-3)        | 1.85 (0.85-4.03) | 8.85E-01                         | 3.30E-01         | 8.81E-01   |
| rs2298122  | CALCYON       | 10  | 134,991,562 | 0.19             | Add                        | 0.93 (0.6-1.44)            | 1.53 (0.87-2.69)     | 2.43 (1.17-5.07) | 3.09E-01                         | 5.76E-01         | 8.85E-01   |
| rs2737703  | KCNJ9         | 1   | 158,322,556 | 0.36             | Dom                        | 0.95 (0.6-1.5)             | 2.58 (1.24-5.36)     | 1.33 (0.74-2.39) | 1.66E-01                         | 3.44E-01         | 8.87E-01   |
| rs10107450 | CHRNA6        | 8   | 42,749,052  | 0.22             | Dom                        | 1.34 (0.85-2.1)            | 1.68 (0.93-3.06)     | 1.88 (0.94-3.74) | 8.15E-01                         | 4.17E-01         | 8.87E-01   |
| rs2834603  | CLIC6         | 21  | 35,014,793  | 0.07             | Dom                        | 0.77 (0.37-1.61)           | 1.58 (0.98-2.54)     | 3.72 (0.9-15.32) | 2.60E-01                         | 3.91E-01         | 8.88E-01   |
| rs1057137  | CHRNA2        | 8   | 27,373,362  | 0.40             | Add                        | 0.87 (0.63-1.21)           | 2.66 (1.34-5.29)     | 1.62 (1.01-2.6)  | 1.35E-01                         | 1.91E-01         | 8.88E-01   |
| rs1879184  | CHRNA2        | 8   | 27,367,620  | 0.14             | Dom                        | 0.92 (0.55-1.55)           | 1.89 (1.13-3.19)     | 1.42 (0.58-3.46) | 5.83E-01                         | 8.03E-01         | 8.88E-01   |
| rs1879182  | CHRNA2        | 8   | 27,371,793  | 0.14             | Dom                        | 0.92 (0.55-1.55)           | 1.89 (1.13-3.19)     | 1.42 (0.58-3.46) | 5.83E-01                         | 8.03E-01         | 8.88E-01   |
| rs3780708  | FREQ (NCS1)   | 9   | 131,975,772 | 0.36             | Add                        | 1.46 (1.05-2.05)           | 2.07 (1.02-4.18)     | 1.67 (1.03-2.73) | 5.34E-01                         | 7.62E-02         | 8.88E-01   |
| rs11575383 | DDC           | 7   | 50,535,184  | 0.07             | Add                        | 0.88 (0.46-1.7)            | 1.7 (1.05-2.76)      | 2.15 (0.62-7.47) | 7.31E-01                         | 8.89E-01         | 8.89E-01   |
| rs891399   | CHRNA2        | 8   | 27,381,340  | 0.13             | Add                        | 0.81 (0.5-1.31)            | 1.71 (1.03-2.83)     | 1.93 (0.81-4.6)  | 7.99E-01                         | 6.75E-01         | 8.90E-01   |
| rs893539   | KLF16         | 19  | 1,794,493   | 0.25             | Add                        | 1.19 (0.84-1.69)           | 1.5 (0.84-2.69)      | 1.91 (1.08-3.36) | 5.07E-01                         | 4.43E-01         | 8.93E-01   |
| rs13428968 | NR4A2         | 2   | 156,900,859 | 0.17             | Add                        | 1.32 (0.88-1.98)           | 1.86 (1.08-3.2)      | 1.55 (0.78-3.09) | 6.65E-01                         | 3.88E-01         | 8.93E-01   |
| rs2565062  | CHRNA2        | 8   | 27,381,857  | 0.13             | Add                        | 0.81 (0.5-1.31)            | 1.72 (1.03-2.85)     | 1.94 (0.81-4.61) | 8.07E-01                         | 6.80E-01         | 8.94E-01   |

**Supplemental Table 1: SNP-Specific Results for Abstinence Rates at End of Treatment**

| SNP        | Gene    | Chr | Position    | MAF <sup>a</sup> | Genetic Model <sup>b</sup> | SNP Odds Ratio<br>(95% CI) | Treatment Odds Ratio |                   | Test of Interaction <sup>c</sup> | LRT <sup>d</sup> |            |
|------------|---------|-----|-------------|------------------|----------------------------|----------------------------|----------------------|-------------------|----------------------------------|------------------|------------|
|            |         |     |             |                  |                            |                            | WT (95% CI)          | Variant (95% CI)  |                                  | Observed P       | Adjusted P |
| rs12244716 | CALCYON | 10  | 134,978,372 | 0.14             | Add                        | 0.85 (0.52-1.38)           | 1.63 (0.97-2.72)     | 2.2 (0.94-5.2)    | 5.42E-01                         | 6.71E-01         | 8.95E-01   |
| rs7633291  | DRD3    | 3   | 115,369,758 | 0.20             | Dom                        | 0.7 (0.43-1.14)            | 1.88 (1.09-3.26)     | 1.43 (0.64-3.19)  | 5.80E-01                         | 2.82E-01         | 8.96E-01   |
| rs356204   | SNCA    | 4   | 90,882,565  | 0.43             | Dom                        | 1.25 (0.76-2.07)           | 1 (0.43-2.31)        | 2.26 (1.29-3.95)  | 1.11E-01                         | 1.56E-01         | 8.96E-01   |
| rs886528   | CREBBP  | 16  | 3,751,557   | 0.47             | Dom                        | 1.05 (0.76-1.47)           | 1.39 (0.57-3.4)      | 1.84 (1.09-3.11)  | 3.06E-01                         | 5.34E-01         | 8.97E-01   |
| rs907094   | PPP1R1B | 17  | 35,043,897  | 0.25             | Add                        | 1.07 (0.75-1.53)           | 1.7 (0.95-3.03)      | 1.82 (1.03-3.2)   | 8.46E-01                         | 8.98E-01         | 8.98E-01   |
| rs4963126  | DRD4    | 11  | 646,845     | 0.48             | Dom                        | 0.85 (0.62-1.17)           | 3.22 (1.32-7.85)     | 1.42 (0.84-2.39)  | 2.04E-01                         | 2.17E-01         | 8.99E-01   |
| rs6296     | HTR1B   | 6   | 78,228,979  | 0.28             | Dom                        | 0.65 (0.41-1.01)           | 1.88 (1.03-3.44)     | 1.6 (0.81-3.17)   | 7.31E-01                         | 1.39E-01         | 8.99E-01   |
| rs2834600  | CLIC6   | 21  | 35,007,972  | 0.15             | Dom                        | 1.11 (0.67-1.84)           | 1.52 (0.89-2.58)     | 2.49 (1.02-6.08)  | 3.51E-01                         | 5.29E-01         | 8.99E-01   |
| rs10485171 | CNR1    | 6   | 88,900,109  | 0.42             | Add                        | 1.03 (0.74-1.42)           | 2 (0.98-4.1)         | 1.73 (1.09-2.74)  | 6.57E-01                         | 9.00E-01         | 9.00E-01   |
| rs1528454  | NR4A2   | 2   | 156,877,951 | 0.30             | Dom                        | 0.77 (0.49-1.2)            | 1.96 (1.05-3.65)     | 1.57 (0.82-3)     | 6.30E-01                         | 4.14E-01         | 9.02E-01   |
| rs4590907  | ANKK1   | 11  | 112,768,580 | 0.14             | Add                        | 1.52 (0.98-2.37)           | 2.04 (1.19-3.5)      | 1.48 (0.7-3.12)   | 4.73E-01                         | 1.29E-01         | 9.02E-01   |
| rs6092704  | GNAS    | 20  | 56,901,873  | 0.10             | Add                        | 0.71 (0.41-1.24)           | 2.06 (1.25-3.37)     | 0.94 (0.34-2.61)  | 1.70E-01                         | 1.29E-01         | 9.04E-01   |
| rs2834605  | CLIC6   | 21  | 35,019,400  | 0.14             | Add                        | 1.03 (0.61-1.72)           | 1.47 (0.87-2.49)     | 2.8 (1.12-7)      | 2.34E-01                         | 4.44E-01         | 9.05E-01   |
| rs1587176  | DRD1    | 5   | 174,783,796 | 0.16             | Add                        | 0.87 (0.56-1.37)           | 1.78 (1.05-3.01)     | 1.7 (0.78-3.7)    | 9.21E-01                         | 8.20E-01         | 9.05E-01   |
| rs1108581  | DBH     | 9   | 135,495,062 | 0.18             | Dom                        | 0.77 (0.47-1.25)           | 2.21 (1.28-3.82)     | 1.06 (0.48-2.36)  | 1.37E-01                         | 1.61E-01         | 9.06E-01   |
| rs3810417  | KLF16   | 19  | 1,815,601   | 0.17             | Add                        | 0.88 (0.55-1.41)           | 1.46 (0.86-2.48)     | 2.67 (1.17-6.09)  | 2.14E-01                         | 4.41E-01         | 9.07E-01   |
| rs11030121 | BDNF    | 11  | 27,692,783  | 0.27             | Add                        | 1.3 (0.92-1.84)            | 1.79 (0.97-3.3)      | 1.71 (1-2.93)     | 9.04E-01                         | 3.38E-01         | 9.08E-01   |
| rs835636   | NCK1    | 3   | 138,157,190 | 0.48             | Dom                        | 1.11 (0.66-1.86)           | 1.64 (0.67-4.02)     | 1.78 (1.06-3)     | 8.76E-01                         | 9.08E-01         | 9.08E-01   |
| rs1107470  | CLIC6   | 21  | 35,021,758  | 0.21             | Dom                        | 1.03 (0.65-1.65)           | 1.38 (0.78-2.42)     | 2.72 (1.27-5.82)  | 1.59E-01                         | 3.45E-01         | 9.09E-01   |
| rs1519480  | BDNF    | 11  | 27,632,288  | 0.29             | Dom                        | 1.32 (0.94-1.86)           | 1.66 (0.86-3.2)      | 1.86 (1-3.46)     | 8.99E-01                         | 2.68E-01         | 9.09E-01   |
| rs16952813 | ADCYAP1 | 18  | 914,630     | 0.08             | Dom                        | 0.59 (0.29-1.19)           | 1.75 (1.08-2.82)     | 1.97 (0.52-7.46)  | 8.68E-01                         | 3.05E-01         | 9.09E-01   |
| rs11660066 | ADCYAP1 | 18  | 918,035     | 0.08             | Dom                        | 0.59 (0.29-1.19)           | 1.75 (1.08-2.82)     | 1.97 (0.52-7.46)  | 8.68E-01                         | 3.05E-01         | 9.09E-01   |
| rs11030119 | BDNF    | 11  | 27,684,678  | 0.26             | Add                        | 1.3 (0.91-1.86)            | 1.77 (0.97-3.24)     | 1.73 (1-3)        | 9.56E-01                         | 3.43E-01         | 9.09E-01   |
| rs4947584  | DDC     | 7   | 50,540,203  | 0.35             | Add                        | 1.01 (0.72-1.41)           | 1.16 (0.61-2.22)     | 2.19 (1.32-3.62)  | 7.02E-02                         | 1.79E-01         | 9.11E-01   |
| rs2100280  | DDC     | 7   | 50,548,330  | 0.25             | Add                        | 0.98 (0.67-1.44)           | 1.24 (0.69-2.21)     | 2.53 (1.37-4.67)  | 6.89E-02                         | 1.83E-01         | 9.11E-01   |
| rs10840495 | TH      | 11  | 2,152,413   | 0.38             | Dom                        | 1.34 (0.81-2.21)           | 1.09 (0.49-2.39)     | 2.13 (1.15-3.95)  | 1.86E-01                         | 1.92E-01         | 9.11E-01   |
| rs174675   | COMT    | 22  | 18,314,051  | 0.28             | Dom                        | 0.89 (0.57-1.39)           | 1.91 (1.04-3.52)     | 1.62 (0.83-3.16)  | 7.18E-01                         | 8.02E-01         | 9.12E-01   |
| rs12944712 | CRHR1   | 17  | 41,226,918  | 0.41             | Dom                        | 0.81 (0.51-1.28)           | 1.08 (0.52-2.24)     | 2.32 (1.3-4.13)   | 1.07E-01                         | 2.10E-01         | 9.12E-01   |
| rs1451368  | DDC     | 7   | 50,555,261  | 0.26             | Add                        | 1.03 (0.72-1.49)           | 1.25 (0.7-2.24)      | 2.43 (1.36-4.35)  | 7.62E-02                         | 1.85E-01         | 9.13E-01   |
| rs6347     | SLC6A3  | 5   | 1,464,412   | 0.27             | Dom                        | 1.58 (1-2.52)              | 2.09 (1.05-4.15)     | 1.64 (0.87-3.1)   | 6.16E-01                         | 1.43E-01         | 9.14E-01   |
| rs2472553  | CHRNA2  | 8   | 27,384,428  | 0.13             | Dom                        | 0.84 (0.49-1.42)           | 1.77 (1.06-2.95)     | 1.78 (0.69-4.54)  | 9.93E-01                         | 7.94E-01         | 9.14E-01   |
| rs6834765  | SNCA    | 4   | 90,903,013  | 0.08             | Dom                        | 1.28 (0.67-2.45)           | 1.52 (0.93-2.48)     | 4.53 (1.35-15.19) | 1.02E-01                         | 1.97E-01         | 9.15E-01   |
| rs12453682 | PPP1R1B | 17  | 35,023,531  | 0.32             | Dom                        | 0.75 (0.48-1.18)           | 1.83 (0.96-3.52)     | 1.73 (0.93-3.24)  | 9.01E-01                         | 4.47E-01         | 9.17E-01   |
| rs6271     | DBH     | 9   | 135,512,095 | 0.08             | Dom                        | 0.57 (0.25-1.29)           | 1.59 (0.99-2.58)     | 5.95 (1.18-30.03) | 1.26E-01                         | 1.60E-01         | 9.17E-01   |
| rs12273363 | BDNF    | 11  | 27,701,435  | 0.16             | Dom                        | 1.41 (0.87-2.28)           | 1.6 (0.92-2.79)      | 2.24 (1.01-4.96)  | 4.95E-01                         | 2.58E-01         | 9.17E-01   |
| rs356168   | SNCA    | 4   | 90,893,454  | 0.46             | Dom                        | 1.23 (0.75-2.02)           | 1 (0.43-2.32)        | 2.23 (1.31-3.81)  | 1.15E-01                         | 1.72E-01         | 9.18E-01   |
| rs2834604  | CLIC6   | 21  | 35,014,932  | 0.34             | Add                        | 0.85 (0.58-1.23)           | 1.88 (0.97-3.67)     | 1.7 (1.01-2.86)   | 7.86E-01                         | 6.24E-01         | 9.18E-01   |
| rs732215   | DDC     | 7   | 50,511,557  | 0.45             | Dom                        | 0.86 (0.52-1.41)           | 3.16 (1.35-7.44)     | 1.38 (0.81-2.36)  | 1.08E-01                         | 1.83E-01         | 9.20E-01   |
| rs11246226 | DRD4    | 11  | 631,191     | 0.48             | Dom                        | 0.99 (0.71-1.39)           | 1.71 (0.67-4.39)     | 2.01 (1.17-3.47)  | 4.84E-01                         | 7.82E-01         | 9.20E-01   |

**Supplemental Table 1: SNP-Specific Results for Abstinence Rates at End of Treatment**

| SNP        | Gene    | Chr | Position    | MAF <sup>a</sup> | Genetic Model <sup>b</sup> | SNP Odds Ratio<br>(95% CI) | Treatment Odds Ratio |                   | Test of Interaction <sup>c</sup> | LRT <sup>d</sup> |            |
|------------|---------|-----|-------------|------------------|----------------------------|----------------------------|----------------------|-------------------|----------------------------------|------------------|------------|
|            |         |     |             |                  |                            |                            | WT (95% CI)          | Variant (95% CI)  |                                  | Observed P       | Adjusted P |
| rs77905    | DBH     | 9   | 135,507,918 | 0.48             | Dom                        | 0.71 (0.43-1.17)           | 2.66 (1.12-6.33)     | 1.4 (0.82-2.41)   | 2.23E-01                         | 1.23E-01         | 9.23E-01   |
| rs2049045  | BDNF    | 11  | 27,650,817  | 0.18             | Add                        | 0.75 (0.48-1.16)           | 1.57 (0.92-2.68)     | 2.1 (1-4.42)      | 5.17E-01                         | 3.44E-01         | 9.24E-01   |
| rs10776672 | CALCYON | 10  | 135,007,945 | 0.11             | Add                        | 1.24 (0.77-2.02)           | 1.92 (1.15-3.2)      | 1.45 (0.61-3.43)  | 5.69E-01                         | 5.80E-01         | 9.24E-01   |
| rs12528626 | EPB41L2 | 6   | 131,291,090 | 0.09             | Add                        | 1.14 (0.66-1.99)           | 2.11 (1.28-3.49)     | 0.82 (0.3-2.25)   | 9.40E-02                         | 2.02E-01         | 9.24E-01   |
| rs2519765  | DBH     | 9   | 135,484,246 | 0.32             | Dom                        | 0.63 (0.4-1)               | 1.57 (0.83-2.97)     | 2 (1.03-3.89)     | 6.05E-01                         | 1.40E-01         | 9.25E-01   |
| rs4543330  | HTR1B   | 6   | 78,247,352  | 0.14             | Add                        | 1.41 (0.91-2.18)           | 1.58 (0.93-2.69)     | 2.22 (1.03-4.78)  | 4.57E-01                         | 1.75E-01         | 9.26E-01   |
| rs2049048  | BDNF    | 11  | 27,707,162  | 0.14             | Add                        | 0.7 (0.43-1.13)            | 1.86 (1.12-3.08)     | 1.48 (0.62-3.53)  | 6.50E-01                         | 2.69E-01         | 9.27E-01   |
| rs11214596 | ANKK1   | 11  | 112,769,721 | 0.49             | Dom                        | 0.9 (0.53-1.51)            | 3.59 (1.42-9.04)     | 1.34 (0.79-2.26)  | 6.90E-02                         | 1.25E-01         | 9.30E-01   |
| rs12360992 | ANKK1   | 11  | 112,768,110 | 0.49             | Dom                        | 0.9 (0.53-1.51)            | 3.59 (1.42-9.04)     | 1.34 (0.79-2.26)  | 6.90E-02                         | 1.25E-01         | 9.30E-01   |
| rs12111375 | HCRTR2  | 6   | 55,176,953  | 0.48             | Dom                        | 0.55 (0.31-0.96)           | 1.57 (0.58-4.26)     | 1.54 (0.89-2.65)  | 9.70E-01                         | 1.16E-01         | 9.30E-01   |
| rs4845652  | CHRNA2  | 1   | 152,804,829 | 0.09             | Add                        | 1.08 (0.64-1.82)           | 1.82 (1.11-2.98)     | 1.55 (0.59-4.08)  | 7.68E-01                         | 9.30E-01         | 9.30E-01   |
| rs11742274 | DRD1    | 5   | 174,792,103 | 0.19             | Add                        | 0.97 (0.64-1.46)           | 2.04 (1.18-3.54)     | 1.4 (0.71-2.76)   | 3.63E-01                         | 6.45E-01         | 9.30E-01   |
| rs3779078  | DDC     | 7   | 50,578,412  | 0.20             | Dom                        | 1.22 (0.77-1.93)           | 2.34 (1.31-4.18)     | 1.09 (0.53-2.25)  | 1.09E-01                         | 2.22E-01         | 9.30E-01   |
| rs2251838  | PRKAR2B | 7   | 106,507,403 | 0.34             | Add                        | 0.95 (0.68-1.32)           | 2.54 (1.33-4.86)     | 1.49 (0.91-2.43)  | 1.11E-01                         | 2.62E-01         | 9.32E-01   |
| rs4947577  | DDC     | 7   | 50,516,103  | 0.41             | Add                        | 1.25 (0.91-1.71)           | 1.3 (0.64-2.64)      | 1.82 (1.15-2.9)   | 2.99E-01                         | 2.00E-01         | 9.32E-01   |
| rs265972   | DRD1    | 5   | 174,793,122 | 0.46             | Add                        | 0.83 (0.61-1.14)           | 2.03 (0.99-4.17)     | 1.74 (1.11-2.75)  | 6.32E-01                         | 4.41E-01         | 9.32E-01   |
| rs12473543 | POMC    | 2   | 25,240,685  | 0.22             | Dom                        | 0.89 (0.56-1.4)            | 2.13 (1.19-3.79)     | 1.28 (0.62-2.63)  | 2.82E-01                         | 4.62E-01         | 9.33E-01   |
| rs2768762  | NTRK1   | 1   | 155,127,086 | 0.20             | Dom                        | 1.13 (0.71-1.8)            | 2.04 (1.15-3.63)     | 1.4 (0.67-2.93)   | 4.33E-01                         | 6.57E-01         | 9.33E-01   |
| rs2191917  | PRKAR2B | 7   | 106,560,944 | 0.09             | Add                        | 0.9 (0.5-1.62)             | 1.51 (0.93-2.46)     | 3.73 (1.21-11.49) | 1.45E-01                         | 3.19E-01         | 9.34E-01   |
| rs755203   | CHRNA4  | 20  | 61,464,708  | 0.42             | Dom                        | 1.08 (0.65-1.8)            | 3.27 (1.36-7.85)     | 1.41 (0.81-2.46)  | 1.13E-01                         | 2.73E-01         | 9.34E-01   |
| rs2283802  | GNAZ    | 22  | 21,784,722  | 0.26             | Add                        | 1.33 (0.94-1.88)           | 1.63 (0.89-2.97)     | 1.72 (0.99-2.98)  | 8.78E-01                         | 2.61E-01         | 9.34E-01   |
| rs2753268  | KCNJ9   | 1   | 158,324,876 | 0.31             | Dom                        | 0.95 (0.61-1.49)           | 2.39 (1.22-4.68)     | 1.35 (0.73-2.48)  | 2.18E-01                         | 4.35E-01         | 9.34E-01   |
| rs6545976  | POMC    | 2   | 25,248,154  | 0.05             | Add                        | 1.31 (0.66-2.63)           | 1.79 (1.1-2.89)      | 1.64 (0.45-6.03)  | 9.04E-01                         | 7.44E-01         | 9.34E-01   |
| rs6856558  | TDO2    | 4   | 157,059,403 | 0.39             | Add                        | 1.11 (0.81-1.51)           | 1.78 (0.9-3.52)      | 1.77 (1.11-2.81)  | 9.76E-01                         | 8.16E-01         | 9.35E-01   |
| rs12401728 | KCNJ9   | 1   | 158,328,583 | 0.21             | Add                        | 0.85 (0.56-1.29)           | 1.58 (0.91-2.74)     | 2.09 (1.05-4.17)  | 5.17E-01                         | 6.62E-01         | 9.35E-01   |
| rs2536504  | PRKAR2B | 7   | 106,501,141 | 0.34             | Add                        | 0.89 (0.64-1.24)           | 2.44 (1.29-4.63)     | 1.5 (0.91-2.48)   | 1.54E-01                         | 2.68E-01         | 9.35E-01   |
| rs10276473 | DDC     | 7   | 50,580,491  | 0.21             | Dom                        | 1.16 (0.73-1.83)           | 2.34 (1.3-4.19)      | 1.13 (0.56-2.31)  | 1.24E-01                         | 2.78E-01         | 9.35E-01   |
| rs1296720  | CREBBP  | 16  | 3,813,643   | 0.18             | Add                        | 1.37 (0.91-2.07)           | 1.74 (0.99-3.05)     | 1.83 (0.93-3.59)  | 9.01E-01                         | 3.15E-01         | 9.36E-01   |
| rs2536503  | PRKAR2B | 7   | 106,501,051 | 0.12             | Add                        | 0.72 (0.44-1.18)           | 1.89 (1.15-3.13)     | 1.38 (0.55-3.42)  | 5.36E-01                         | 3.00E-01         | 9.36E-01   |
| rs12953076 | CRHR1   | 17  | 41,209,781  | 0.17             | Add                        | 1.08 (0.71-1.64)           | 1.74 (1.01-2.98)     | 1.79 (0.89-3.63)  | 9.42E-01                         | 9.36E-01         | 9.36E-01   |
| rs5993891  | COMT    | 22  | 18,339,746  | 0.06             | Add                        | 1.3 (0.65-2.59)            | 1.98 (1.21-3.23)     | 0.67 (0.19-2.39)  | 1.20E-01                         | 1.97E-01         | 9.37E-01   |
| rs1364043  | HTR1A   | 5   | 63,286,607  | 0.24             | Dom                        | 0.95 (0.6-1.5)             | 1.94 (1.08-3.48)     | 1.52 (0.75-3.07)  | 5.99E-01                         | 8.37E-01         | 9.37E-01   |
| rs257384   | PRKAR2B | 7   | 106,592,630 | 0.45             | Dom                        | 1.09 (0.67-1.77)           | 1.28 (0.56-2.91)     | 2.02 (1.18-3.45)  | 3.65E-01                         | 6.02E-01         | 9.37E-01   |
| rs3788337  | GNAZ    | 22  | 21,742,017  | 0.35             | Dom                        | 1.01 (0.64-1.6)            | 1.12 (0.58-2.19)     | 2.46 (1.31-4.6)   | 9.42E-02                         | 2.39E-01         | 9.37E-01   |
| rs806379   | CNR1    | 6   | 88,917,986  | 0.50             | Add                        | 1.04 (0.76-1.42)           | 0.99 (0.46-2.13)     | 1.75 (1.11-2.76)  | 7.62E-02                         | 1.88E-01         | 9.38E-01   |
| rs3952     | PRKCABP | 22  | 36,786,544  | 0.31             | Dom                        | 1.35 (0.86-2.12)           | 2.34 (1.18-4.63)     | 1.4 (0.76-2.56)   | 2.70E-01                         | 2.70E-01         | 9.38E-01   |
| rs1561289  | POMC    | 2   | 25,222,544  | 0.25             | Add                        | 0.8 (0.54-1.18)            | 1.78 (1-3.18)        | 1.76 (0.95-3.26)  | 9.69E-01                         | 5.14E-01         | 9.39E-01   |
| rs9353524  | CNR1    | 6   | 88,894,335  | 0.21             | Dom                        | 0.76 (0.47-1.22)           | 1.38 (0.79-2.39)     | 2.8 (1.26-6.23)   | 1.52E-01                         | 2.25E-01         | 9.39E-01   |
| rs7124442  | BDNF    | 11  | 27,633,617  | 0.27             | Add                        | 1.3 (0.91-1.86)            | 1.72 (0.92-3.22)     | 1.79 (1.03-3.09)  | 9.20E-01                         | 3.16E-01         | 9.41E-01   |

**Supplemental Table 1: SNP-Specific Results for Abstinence Rates at End of Treatment**

| SNP        | Gene    | Chr | Position    | MAF <sup>a</sup> | Genetic Model <sup>b</sup> | SNP Odds Ratio<br>(95% CI) | Treatment Odds Ratio |                   | Test of Interaction <sup>c</sup> | LRT <sup>d</sup> |            |
|------------|---------|-----|-------------|------------------|----------------------------|----------------------------|----------------------|-------------------|----------------------------------|------------------|------------|
|            |         |     |             |                  |                            |                            | WT (95% CI)          | Variant (95% CI)  |                                  | Observed P       | Adjusted P |
| rs3777464  | EPB41L2 | 6   | 131,308,450 | 0.10             | Dom                        | 1.28 (0.74-2.21)           | 2.1 (1.26-3.5)       | 0.93 (0.35-2.45)  | 1.46E-01                         | 2.51E-01         | 9.41E-01   |
| rs2494211  | KCNJ9   | 1   | 158,325,236 | 0.36             | Dom                        | 0.96 (0.6-1.51)            | 2.49 (1.2-5.16)      | 1.37 (0.76-2.45)  | 2.10E-01                         | 4.20E-01         | 9.42E-01   |
| rs2797855  | DBH     | 9   | 135,500,715 | 0.43             | Dom                        | 0.7 (0.44-1.12)            | 2.5 (1.15-5.44)      | 1.46 (0.84-2.55)  | 2.75E-01                         | 1.47E-01         | 9.42E-01   |
| rs6280     | DRD3    | 3   | 115,373,505 | 0.34             | Dom                        | 0.89 (0.56-1.41)           | 2.56 (1.26-5.19)     | 1.41 (0.77-2.57)  | 2.08E-01                         | 3.54E-01         | 9.42E-01   |
| rs2076372  | PRKCABP | 22  | 36,804,911  | 0.26             | Dom                        | 0.79 (0.5-1.25)            | 1.36 (0.76-2.44)     | 2.57 (1.26-5.24)  | 1.75E-01                         | 2.76E-01         | 9.42E-01   |
| rs11030107 | BDNF    | 11  | 27,651,411  | 0.23             | Dom                        | 1.18 (0.74-1.88)           | 1.48 (0.81-2.69)     | 2.58 (1.25-5.32)  | 2.44E-01                         | 3.35E-01         | 9.43E-01   |
| rs2250121  | PRKAR2B | 7   | 106,540,484 | 0.09             | Add                        | 0.88 (0.49-1.6)            | 1.52 (0.93-2.47)     | 3.65 (1.19-11.2)  | 1.56E-01                         | 3.39E-01         | 9.43E-01   |
| rs8046065  | CREBBP  | 16  | 3,778,299   | 0.11             | Dom                        | 0.78 (0.44-1.38)           | 1.51 (0.91-2.5)      | 3.25 (1.14-9.31)  | 1.97E-01                         | 3.45E-01         | 9.43E-01   |
| rs10401329 | KLF16   | 19  | 1,822,699   | 0.13             | Dom                        | 1.02 (0.59-1.78)           | 1.55 (0.92-2.64)     | 3.03 (1.12-8.15)  | 2.45E-01                         | 4.69E-01         | 9.43E-01   |
| rs878887   | CRHR1   | 17  | 41,268,363  | 0.20             | Add                        | 1.32 (0.89-1.95)           | 1.57 (0.89-2.76)     | 2.17 (1.15-4.1)   | 4.17E-01                         | 2.85E-01         | 9.44E-01   |
| rs1495099  | PPP1R1B | 17  | 35,037,990  | 0.30             | Dom                        | 0.82 (0.52-1.29)           | 1.81 (0.96-3.42)     | 1.72 (0.9-3.29)   | 9.11E-01                         | 6.84E-01         | 9.44E-01   |
| rs2275723  | CALCYON | 10  | 134,989,625 | 0.11             | Add                        | 0.83 (0.48-1.44)           | 1.65 (1-2.73)        | 2.39 (0.87-6.52)  | 5.16E-01                         | 6.73E-01         | 9.45E-01   |
| rs6955387  | PRKAR2B | 7   | 106,535,275 | 0.39             | Add                        | 0.94 (0.68-1.31)           | 2.61 (1.32-5.16)     | 1.58 (0.98-2.53)  | 1.34E-01                         | 2.92E-01         | 9.45E-01   |
| rs6121179  | EPB41L1 | 20  | 34,256,911  | 0.19             | Dom                        | 0.85 (0.53-1.36)           | 1.91 (1.09-3.33)     | 1.46 (0.68-3.16)  | 5.86E-01                         | 6.51E-01         | 9.46E-01   |
| rs806374   | CNR1    | 6   | 88,914,039  | 0.35             | Add                        | 0.85 (0.6-1.19)            | 2.42 (1.26-4.62)     | 1.52 (0.92-2.52)  | 1.89E-01                         | 2.22E-01         | 9.46E-01   |
| rs6941712  | EPB41L2 | 6   | 131,323,903 | 0.12             | Dom                        | 1.33 (0.8-2.22)            | 2.13 (1.26-3.62)     | 1.02 (0.42-2.45)  | 1.57E-01                         | 2.25E-01         | 9.47E-01   |
| rs1150143  | NR4A2   | 2   | 156,885,862 | 0.34             | Dom                        | 0.93 (0.59-1.46)           | 1.7 (0.86-3.35)      | 1.8 (0.99-3.29)   | 8.98E-01                         | 9.47E-01         | 9.47E-01   |
| rs11214589 | ANKK1   | 11  | 112,750,258 | 0.46             | Dom                        | 0.66 (0.39-1.11)           | 2.72 (1.11-6.64)     | 1.63 (0.93-2.86)  | 3.45E-01                         | 1.39E-01         | 9.47E-01   |
| rs2168631  | DRD1    | 5   | 174,808,608 | 0.17             | Add                        | 1.21 (0.8-1.83)            | 2.18 (1.25-3.79)     | 1.21 (0.61-2.42)  | 1.71E-01                         | 2.96E-01         | 9.47E-01   |
| rs2236081  | EPB41L2 | 6   | 131,196,716 | 0.28             | Dom                        | 1.47 (0.93-2.31)           | 2.16 (1.11-4.21)     | 1.49 (0.8-2.75)   | 4.21E-01                         | 2.06E-01         | 9.48E-01   |
| rs17153861 | PRKAR2B | 7   | 106,556,875 | 0.09             | Add                        | 0.91 (0.5-1.65)            | 1.52 (0.94-2.48)     | 3.63 (1.18-11.18) | 1.61E-01                         | 3.51E-01         | 9.49E-01   |
| rs735421   | CHRNA2  | 8   | 27,375,209  | 0.30             | Dom                        | 1.42 (0.9-2.25)            | 1.78 (0.9-3.51)      | 1.81 (0.98-3.34)  | 9.68E-01                         | 3.09E-01         | 9.49E-01   |
| rs130021   | CREBBP  | 16  | 3,772,472   | 0.35             | Add                        | 1.2 (0.85-1.68)            | 2.46 (1.23-4.92)     | 1.57 (0.97-2.54)  | 2.03E-01                         | 3.02E-01         | 9.49E-01   |
| rs129963   | CREBBP  | 16  | 3,736,148   | 0.44             | Dom                        | 1.46 (0.88-2.41)           | 1.68 (0.71-3.98)     | 1.78 (1.05-3.02)  | 9.12E-01                         | 3.14E-01         | 9.49E-01   |
| rs6336     | NTRK1   | 1   | 155,115,542 | 0.07             | Dom                        | 1.16 (0.6-2.27)            | 1.61 (0.99-2.6)      | 3.23 (0.92-11.36) | 3.08E-01                         | 5.01E-01         | 9.49E-01   |
| rs10770140 | TH      | 11  | 2,150,173   | 0.40             | Dom                        | 1.35 (0.82-2.21)           | 1.26 (0.56-2.82)     | 2.17 (1.23-3.84)  | 2.82E-01                         | 2.39E-01         | 9.50E-01   |
| rs4938019  | DRD2    | 11  | 112,846,601 | 0.15             | Add                        | 1.02 (0.65-1.63)           | 1.39 (0.82-2.34)     | 3.21 (1.41-7.29)  | 8.21E-02                         | 1.85E-01         | 9.50E-01   |
| rs11265320 | KCNJ9   | 1   | 158,336,536 | 0.48             | Dom                        | 0.88 (0.54-1.45)           | 2.3 (0.97-5.46)      | 1.55 (0.91-2.63)  | 4.45E-01                         | 6.22E-01         | 9.51E-01   |
| rs3787138  | CHRNA4  | 20  | 61,449,668  | 0.13             | Dom                        | 1.48 (0.86-2.53)           | 1.9 (1.08-3.32)      | 1.88 (0.76-4.68)  | 9.88E-01                         | 3.65E-01         | 9.51E-01   |
| rs6060845  | EPB41L1 | 20  | 34,233,225  | 0.25             | Dom                        | 0.87 (0.55-1.36)           | 1.92 (1.06-3.49)     | 1.58 (0.79-3.15)  | 6.78E-01                         | 7.37E-01         | 9.52E-01   |
| rs3789033  | CREBBP  | 16  | 3,779,536   | 0.24             | Add                        | 0.92 (0.63-1.34)           | 2.14 (1.2-3.8)       | 1.39 (0.76-2.54)  | 2.63E-01                         | 4.76E-01         | 9.52E-01   |
| rs11667211 | KLF16   | 19  | 1,790,483   | 0.14             | Dom                        | 0.89 (0.53-1.5)            | 1.81 (1.07-3.06)     | 1.54 (0.63-3.79)  | 7.65E-01                         | 8.76E-01         | 9.52E-01   |
| rs4579483  | DDC     | 7   | 50,513,594  | 0.41             | Add                        | 1.24 (0.9-1.69)            | 1.35 (0.67-2.71)     | 1.85 (1.17-2.94)  | 3.26E-01                         | 2.25E-01         | 9.52E-01   |
| rs7638876  | DRD3    | 3   | 115,376,990 | 0.35             | Dom                        | 0.85 (0.54-1.35)           | 2.46 (1.23-4.93)     | 1.33 (0.73-2.42)  | 1.88E-01                         | 2.88E-01         | 9.52E-01   |
| rs2118404  | POMC    | 2   | 25,230,833  | 0.24             | Add                        | 0.81 (0.55-1.2)            | 1.81 (1.02-3.23)     | 1.73 (0.93-3.2)   | 8.99E-01                         | 5.54E-01         | 9.53E-01   |
| rs9392     | CREBBP  | 16  | 3,715,170   | 0.22             | Add                        | 1.2 (0.81-1.77)            | 1.7 (0.96-3.02)      | 1.8 (0.97-3.33)   | 8.90E-01                         | 6.48E-01         | 9.53E-01   |
| rs10891545 | ANKK1   | 11  | 112,763,275 | 0.15             | Dom                        | 1.45 (0.88-2.38)           | 2.11 (1.22-3.65)     | 1.28 (0.56-2.91)  | 3.22E-01                         | 2.17E-01         | 9.54E-01   |
| rs2240713  | COMT    | 22  | 18,341,101  | 0.05             | Add                        | 1.3 (0.65-2.62)            | 2.09 (1.28-3.43)     | 0.71 (0.19-2.58)  | 1.24E-01                         | 2.19E-01         | 9.54E-01   |
| rs7103873  | BDNF    | 11  | 27,656,893  | 0.48             | Dom                        | 1.15 (0.83-1.59)           | 1.34 (0.55-3.25)     | 1.93 (1.14-3.26)  | 8.48E-01                         | 6.74E-01         | 9.54E-01   |

**Supplemental Table 1: SNP-Specific Results for Abstinence Rates at End of Treatment**

| SNP        | Gene        | Chr | Position    | MAF <sup>a</sup> | Genetic Model <sup>b</sup> | SNP Odds Ratio<br>(95% CI) | Treatment Odds Ratio |                  | Test of Interaction <sup>c</sup> | LRT <sup>d</sup> |            |
|------------|-------------|-----|-------------|------------------|----------------------------|----------------------------|----------------------|------------------|----------------------------------|------------------|------------|
|            |             |     |             |                  |                            |                            | WT (95% CI)          | Variant (95% CI) |                                  | Observed P       | Adjusted P |
| rs2134655  | DRD3        | 3   | 115,340,891 | 0.27             | Dom                        | 1.25 (0.8-1.95)            | 1.44 (0.77-2.68)     | 2.13 (1.1-4.12)  | 3.96E-01                         | 3.93E-01         | 9.54E-01   |
| rs2012859  | PRKCABP     | 22  | 36,803,652  | 0.30             | Dom                        | 0.78 (0.5-1.22)            | 1.35 (0.73-2.51)     | 2.3 (1.18-4.48)  | 2.54E-01                         | 3.21E-01         | 9.55E-01   |
| rs11564703 | TH          | 11  | 2,163,785   | 0.41             | Add                        | 1.31 (0.95-1.8)            | 1.9 (0.92-3.94)      | 1.76 (1.11-2.77) | 8.07E-01                         | 2.49E-01         | 9.55E-01   |
| rs2273504  | CHRNA4      | 20  | 61,458,505  | 0.15             | Add                        | 1.04 (0.65-1.66)           | 2.23 (1.29-3.84)     | 1.13 (0.5-2.54)  | 1.57E-01                         | 3.68E-01         | 9.55E-01   |
| rs2247688  | EPB41L1     | 20  | 34,238,965  | 0.25             | Dom                        | 0.92 (0.59-1.45)           | 1.89 (1.04-3.44)     | 1.6 (0.8-3.17)   | 7.16E-01                         | 8.68E-01         | 9.56E-01   |
| rs1106359  | CHRNA2      | 8   | 27,365,256  | 0.42             | Add                        | 0.91 (0.67-1.25)           | 2.24 (1.12-4.46)     | 1.67 (1.05-2.66) | 3.65E-01                         | 5.23E-01         | 9.56E-01   |
| rs737662   | PRKCABP     | 22  | 36,782,311  | 0.31             | Dom                        | 1.34 (0.85-2.11)           | 2.28 (1.15-4.51)     | 1.42 (0.77-2.62) | 3.12E-01                         | 3.03E-01         | 9.57E-01   |
| rs7017417  | CHRNA2      | 8   | 27,401,222  | 0.09             | Dom                        | 0.82 (0.45-1.5)            | 2.02 (1.23-3.32)     | 0.88 (0.29-2.65) | 1.78E-01                         | 3.02E-01         | 9.57E-01   |
| rs1385884  | DRD3        | 3   | 115,324,315 | 0.43             | Dom                        | 0.91 (0.66-1.26)           | 1.56 (0.7-3.47)      | 1.84 (1.07-3.17) | 8.81E-01                         | 8.47E-01         | 9.57E-01   |
| rs2281487  | EPB41L2     | 6   | 131,192,810 | 0.40             | Add                        | 0.75 (0.54-1.04)           | 1.66 (0.86-3.2)      | 1.8 (1.11-2.93)  | 8.09E-01                         | 2.13E-01         | 9.57E-01   |
| rs1874228  | PPP1R1B     | 17  | 35,028,800  | 0.27             | Dom                        | 0.85 (0.54-1.34)           | 2.07 (1.12-3.82)     | 1.51 (0.77-2.97) | 5.04E-01                         | 5.90E-01         | 9.57E-01   |
| rs7003694  | CHRNA2      | 8   | 27,403,111  | 0.09             | Add                        | 0.65 (0.36-1.19)           | 1.83 (1.13-2.96)     | 1.52 (0.48-4.81) | 7.70E-01                         | 3.06E-01         | 9.58E-01   |
| rs12527605 | EPB41L2     | 6   | 131,326,069 | 0.09             | Add                        | 1.17 (0.67-2.03)           | 2.07 (1.26-3.41)     | 0.89 (0.32-2.42) | 1.31E-01                         | 2.51E-01         | 9.58E-01   |
| rs324026   | DRD3        | 3   | 115,373,732 | 0.34             | Dom                        | 0.84 (0.53-1.32)           | 2.3 (1.16-4.55)      | 1.42 (0.78-2.59) | 2.98E-01                         | 3.88E-01         | 9.58E-01   |
| rs11214611 | DRD2        | 11  | 112,835,429 | 0.15             | Add                        | 1.04 (0.66-1.65)           | 1.39 (0.83-2.34)     | 3.14 (1.38-7.14) | 9.12E-02                         | 1.96E-01         | 9.58E-01   |
| rs835616   | DRD1        | 5   | 174,796,296 | 0.36             | Dom                        | 0.98 (0.62-1.54)           | 1.25 (0.63-2.5)      | 2.26 (1.25-4.1)  | 2.04E-01                         | 4.46E-01         | 9.59E-01   |
| rs12055940 | PRKAR2B     | 7   | 106,538,782 | 0.09             | Add                        | 0.9 (0.5-1.63)             | 1.53 (0.94-2.49)     | 3.54 (1.15-10.9) | 1.74E-01                         | 3.73E-01         | 9.59E-01   |
| rs2191416  | CREBBP      | 16  | 3,710,730   | 0.24             | Add                        | 1.19 (0.82-1.72)           | 1.51 (0.84-2.71)     | 2.03 (1.14-3.64) | 4.29E-01                         | 4.62E-01         | 9.59E-01   |
| rs12639080 | DRD3        | 3   | 115,386,481 | 0.34             | Dom                        | 0.75 (0.48-1.18)           | 2.01 (1.01-3.98)     | 1.51 (0.82-2.76) | 5.40E-01                         | 3.40E-01         | 9.59E-01   |
| rs9314348  | CHRNA2      | 8   | 27,401,343  | 0.10             | Dom                        | 0.8 (0.44-1.46)            | 2 (1.22-3.29)        | 0.93 (0.31-2.78) | 2.10E-01                         | 3.20E-01         | 9.60E-01   |
| rs7178176  | CHRNA7      | 15  | 30,231,105  | 0.24             | Add                        | 1.02 (0.7-1.5)             | 1.28 (0.72-2.26)     | 2.5 (1.33-4.7)   | 9.42E-02                         | 2.05E-01         | 9.60E-01   |
| rs5326     | DRD1        | 5   | 174,802,802 | 0.13             | Dom                        | 0.79 (0.46-1.36)           | 1.51 (0.91-2.5)      | 3.04 (1.13-8.19) | 2.16E-01                         | 3.62E-01         | 9.62E-01   |
| rs6334     | NTRK1       | 1   | 155,112,857 | 0.24             | Add                        | 1.22 (0.78-1.93)           | 1.99 (1.11-3.58)     | 1.59 (0.89-2.85) | 5.42E-01                         | 5.92E-01         | 9.62E-01   |
| rs891394   | CHRNA2      | 8   | 27,375,686  | 0.26             | Add                        | 1.17 (0.81-1.68)           | 1.46 (0.81-2.62)     | 2.12 (1.2-3.76)  | 3.14E-01                         | 3.63E-01         | 9.64E-01   |
| rs7803247  | DDC         | 7   | 50,508,237  | 0.42             | Add                        | 1.16 (0.85-1.59)           | 1.23 (0.61-2.48)     | 1.85 (1.17-2.93) | 2.02E-01                         | 2.50E-01         | 9.64E-01   |
| rs11238133 | DDC         | 7   | 50,510,408  | 0.32             | Add                        | 1.28 (0.92-1.78)           | 1.53 (0.8-2.93)      | 1.85 (1.12-3.04) | 5.82E-01                         | 2.57E-01         | 9.64E-01   |
| rs4733065  | CHRNA2      | 8   | 27,363,921  | 0.45             | Dom                        | 1.28 (0.78-2.09)           | 1.32 (0.58-3)        | 2.09 (1.2-3.63)  | 3.63E-01                         | 3.54E-01         | 9.65E-01   |
| rs1451372  | DDC         | 7   | 50,521,365  | 0.41             | Add                        | 1.23 (0.9-1.68)            | 1.36 (0.67-2.74)     | 1.85 (1.16-2.93) | 3.45E-01                         | 2.54E-01         | 9.65E-01   |
| rs129886   | DBH         | 9   | 135,518,542 | 0.17             | Add                        | 0.95 (0.62-1.45)           | 1.77 (1.03-3.04)     | 1.83 (0.9-3.75)  | 9.34E-01                         | 9.65E-01         | 9.65E-01   |
| rs6356     | TH          | 11  | 2,147,527   | 0.36             | Add                        | 0.9 (0.57-1.41)            | 1.69 (0.88-3.27)     | 1.76 (1.08-2.88) | 8.58E-01                         | 8.70E-01         | 9.65E-01   |
| rs9298628  | CHRNA6      | 8   | 42,725,148  | 0.19             | Add                        | 1.17 (0.78-1.76)           | 1.79 (1.02-3.15)     | 1.62 (0.84-3.13) | 8.04E-01                         | 7.21E-01         | 9.65E-01   |
| rs1342043  | FREQ (NCS1) | 9   | 131,998,126 | 0.14             | Add                        | 0.63 (0.38-1.06)           | 1.6 (0.96-2.65)      | 2.86 (1.11-7.4)  | 2.75E-01                         | 1.35E-01         | 9.65E-01   |
| rs265971   | DRD1        | 5   | 174,793,017 | 0.28             | Dom                        | 0.83 (0.58-1.18)           | 1.62 (0.89-2.98)     | 1.9 (0.97-3.73)  | 7.30E-01                         | 5.67E-01         | 9.65E-01   |
| rs2273505  | CHRNA4      | 20  | 61,461,322  | 0.07             | Add                        | 1.02 (0.55-1.9)            | 1.88 (1.14-3.12)     | 1.46 (0.47-4.56) | 6.85E-01                         | 9.15E-01         | 9.66E-01   |
| rs879606   | PPP1R1B     | 17  | 35,035,375  | 0.19             | Add                        | 1.22 (0.83-1.8)            | 1.69 (0.98-2.91)     | 1.82 (0.95-3.51) | 8.48E-01                         | 5.74E-01         | 9.66E-01   |
| rs2087017  | DRD3        | 3   | 115,324,703 | 0.43             | Dom                        | 0.9 (0.65-1.25)            | 1.56 (0.7-3.46)      | 1.86 (1.08-3.2)  | 8.43E-01                         | 8.19E-01         | 9.66E-01   |
| rs130058   | HTR1B       | 6   | 78,230,000  | 0.29             | Add                        | 0.98 (0.69-1.4)            | 1.64 (0.9-3.02)      | 1.8 (1.04-3.1)   | 8.04E-01                         | 9.66E-01         | 9.66E-01   |
| rs1003641  | ANKK1       | 11  | 112,778,846 | 0.30             | Dom                        | 1.17 (0.75-1.84)           | 2.1 (1.08-4.1)       | 1.51 (0.82-2.8)  | 4.76E-01                         | 6.42E-01         | 9.67E-01   |
| rs806369   | CNR1        | 6   | 88,912,897  | 0.31             | Dom                        | 1.14 (0.73-1.79)           | 1.86 (0.96-3.6)      | 1.67 (0.9-3.08)  | 8.15E-01                         | 8.30E-01         | 9.67E-01   |

**Supplemental Table 1: SNP-Specific Results for Abstinence Rates at End of Treatment**

| SNP        | Gene         | Chr | Position    | MAF <sup>a</sup> | Genetic Model <sup>b</sup> | SNP Odds Ratio<br>(95% CI) | Treatment Odds Ratio |                  | Test of Interaction <sup>c</sup> | LRT <sup>d</sup> |            |
|------------|--------------|-----|-------------|------------------|----------------------------|----------------------------|----------------------|------------------|----------------------------------|------------------|------------|
|            |              |     |             |                  |                            |                            | WT (95% CI)          | Variant (95% CI) |                                  | Observed P       | Adjusted P |
| rs2044859  | DDC          | 7   | 50,580,056  | 0.35             | Dom                        | 1.13 (0.71-1.79)           | 2.83 (1.34-5.96)     | 1.3 (0.74-2.31)  | 1.07E-01                         | 2.55E-01         | 9.67E-01   |
| rs2236196  | CHRNA4       | 20  | 61,448,000  | 0.27             | Dom                        | 1.34 (0.86-2.11)           | 1.71 (0.89-3.31)     | 1.95 (1.04-3.66) | 7.79E-01                         | 3.99E-01         | 9.67E-01   |
| rs37022    | SLC6A3       | 5   | 1,468,629   | 0.15             | Dom                        | 0.64 (0.39-1.07)           | 1.76 (1.05-2.94)     | 2.2 (0.83-5.87)  | 5.97E-01                         | 2.10E-01         | 9.67E-01   |
| rs2237649  | PRKAR2B      | 7   | 106,481,518 | 0.47             | Add                        | 1.11 (0.81-1.53)           | 2.7 (1.24-5.88)      | 1.72 (1.09-2.7)  | 1.68E-01                         | 3.36E-01         | 9.67E-01   |
| rs936465   | DRD4         | 11  | 633,568     | 0.45             | Add                        | 1.18 (0.84-1.64)           | 1.21 (0.55-2.64)     | 1.74 (1.08-2.79) | 2.90E-01                         | 3.28E-01         | 9.68E-01   |
| rs3122167  | HCRTR2       | 6   | 55,220,774  | 0.28             | Add                        | 0.8 (0.55-1.15)            | 1.3 (0.73-2.33)      | 2.32 (1.28-4.2)  | 1.26E-01                         | 1.77E-01         | 9.68E-01   |
| rs3134711  | HCRTR2       | 6   | 55,211,851  | 0.28             | Add                        | 0.81 (0.56-1.17)           | 1.3 (0.73-2.33)      | 2.36 (1.3-4.27)  | 1.18E-01                         | 1.79E-01         | 9.69E-01   |
| rs2070762  | TH           | 11  | 2,142,911   | 0.50             | Dom                        | 1.16 (0.7-1.91)            | 1.37 (0.58-3.26)     | 1.91 (1.13-3.24) | 5.24E-01                         | 6.67E-01         | 9.69E-01   |
| rs2651418  | CHRNA7       | 15  | 30,226,573  | 0.49             | Dom                        | 0.85 (0.51-1.41)           | 0.89 (0.37-2.09)     | 2.3 (1.34-3.94)  | 6.58E-02                         | 1.60E-01         | 9.69E-01   |
| rs2322581  | CHRNA2       | 8   | 27,379,524  | 0.17             | Add                        | 0.84 (0.54-1.3)            | 1.63 (0.96-2.76)     | 2.08 (0.98-4.43) | 5.86E-01                         | 6.51E-01         | 9.70E-01   |
| rs9492767  | EPB41L2      | 6   | 131,314,703 | 0.19             | Dom                        | 1.46 (0.92-2.32)           | 1.93 (1.08-3.45)     | 1.63 (0.79-3.34) | 7.22E-01                         | 2.65E-01         | 9.70E-01   |
| rs2519147  | DBH          | 9   | 135,485,139 | 0.35             | Add                        | 0.75 (0.53-1.06)           | 1.63 (0.86-3.06)     | 1.88 (1.12-3.17) | 6.84E-01                         | 2.54E-01         | 9.70E-01   |
| rs324035   | DRD3         | 3   | 115,351,544 | 0.21             | Add                        | 1.09 (0.74-1.6)            | 2.07 (1.18-3.64)     | 1.42 (0.76-2.65) | 3.35E-01                         | 5.86E-01         | 9.71E-01   |
| rs9802616  | FREQ (NCS1)  | 9   | 131,970,944 | 0.16             | Add                        | 1.1 (0.73-1.68)            | 2.34 (1.36-4.02)     | 1.03 (0.51-2.09) | 5.56E-02                         | 1.44E-01         | 9.71E-01   |
| rs6466156  | PRKAR2B      | 7   | 106,519,170 | 0.35             | Add                        | 1.03 (0.74-1.43)           | 2.47 (1.28-4.77)     | 1.51 (0.93-2.48) | 1.54E-01                         | 3.63E-01         | 9.71E-01   |
| rs4311512  | HCRTR2       | 6   | 55,198,654  | 0.28             | Add                        | 0.8 (0.55-1.15)            | 1.31 (0.73-2.35)     | 2.34 (1.29-4.23) | 1.29E-01                         | 1.82E-01         | 9.71E-01   |
| rs17059736 | EPB41L2      | 6   | 131,232,531 | 0.12             | Dom                        | 0.94 (0.56-1.6)            | 2.12 (1.26-3.55)     | 0.96 (0.38-2.42) | 1.45E-01                         | 3.28E-01         | 9.71E-01   |
| rs1913456  | CHRNA7       | 15  | 30,133,241  | 0.20             | Add                        | 1.21 (0.83-1.76)           | 2.27 (1.3-3.97)      | 1.19 (0.64-2.24) | 9.96E-02                         | 1.89E-01         | 9.71E-01   |
| rs2734841  | ANKK1        | 11  | 112,786,986 | 0.30             | Dom                        | 1.17 (0.74-1.83)           | 2.11 (1.08-4.1)      | 1.53 (0.83-2.83) | 4.90E-01                         | 6.60E-01         | 9.71E-01   |
| rs2278319  | CHRNA2       | 8   | 27,364,878  | 0.24             | Add                        | 1.24 (0.86-1.79)           | 1.75 (0.98-3.12)     | 1.79 (1.01-3.19) | 9.45E-01                         | 4.94E-01         | 9.72E-01   |
| rs7017612  | CHRNA6;CHRN3 | 8   | 42,718,402  | 0.20             | Dom                        | 0.98 (0.61-1.57)           | 1.55 (0.89-2.72)     | 2.26 (1.04-4.88) | 4.44E-01                         | 7.44E-01         | 9.73E-01   |
| rs11749676 | DRD1         | 5   | 174,798,904 | 0.41             | Dom                        | 0.75 (0.48-1.19)           | 1.43 (0.71-2.88)     | 2.08 (1.15-3.79) | 4.24E-01                         | 3.68E-01         | 9.73E-01   |
| rs9972882  | PPP1R1B      | 17  | 35,061,224  | 0.27             | Dom                        | 0.82 (0.52-1.28)           | 1.72 (0.95-3.12)     | 1.86 (0.93-3.71) | 8.75E-01                         | 6.76E-01         | 9.73E-01   |
| rs3897584  | ANKK1        | 11  | 112,754,935 | 0.35             | Dom                        | 0.69 (0.44-1.08)           | 2 (1.03-3.89)        | 1.57 (0.85-2.9)  | 6.02E-01                         | 2.03E-01         | 9.74E-01   |
| rs730092   | DDC          | 7   | 50,503,248  | 0.43             | Add                        | 1.15 (0.84-1.57)           | 1.23 (0.61-2.49)     | 1.86 (1.18-2.95) | 1.99E-01                         | 2.74E-01         | 9.75E-01   |
| rs11603404 | DRD4         | 11  | 646,940     | 0.15             | Dom                        | 0.98 (0.6-1.6)             | 1.81 (1.06-3.08)     | 1.63 (0.7-3.79)  | 8.40E-01                         | 9.75E-01         | 9.75E-01   |
| rs10891549 | ANKK1        | 11  | 112,783,657 | 0.48             | Dom                        | 0.88 (0.53-1.47)           | 3.25 (1.33-7.91)     | 1.39 (0.81-2.37) | 1.08E-01                         | 1.88E-01         | 9.75E-01   |
| rs4460839  | DRD2         | 11  | 112,827,006 | 0.09             | Dom                        | 1.08 (0.59-1.97)           | 2.09 (1.26-3.46)     | 0.8 (0.27-2.35)  | 1.14E-01                         | 2.66E-01         | 9.75E-01   |
| rs6277     | ANKK1        | 11  | 112,788,669 | 0.48             | Dom                        | 0.93 (0.55-1.57)           | 3.38 (1.35-8.5)      | 1.4 (0.82-2.37)  | 1.02E-01                         | 1.98E-01         | 9.75E-01   |
| rs7771240  | HCRTR2       | 6   | 55,201,790  | 0.28             | Add                        | 0.81 (0.56-1.17)           | 1.3 (0.73-2.33)      | 2.34 (1.29-4.25) | 1.23E-01                         | 1.90E-01         | 9.75E-01   |
| rs12422191 | ANKK1        | 11  | 112,779,220 | 0.09             | Add                        | 1.02 (0.58-1.79)           | 1.71 (1.04-2.8)      | 1.93 (0.69-5.38) | 8.35E-01                         | 9.76E-01         | 9.76E-01   |
| rs548646   | OPRM1        | 6   | 154,459,840 | 0.35             | Add                        | 0.98 (0.7-1.36)            | 2.62 (1.37-5.03)     | 1.47 (0.9-2.41)  | 9.03E-02                         | 2.17E-01         | 9.76E-01   |
| rs2237652  | PRKAR2B      | 7   | 106,547,212 | 0.48             | Add                        | 0.91 (0.66-1.24)           | 2.3 (1.08-4.88)      | 1.75 (1.12-2.76) | 4.07E-01                         | 5.73E-01         | 9.76E-01   |
| rs265981   | DRD1         | 5   | 174,803,508 | 0.41             | Dom                        | 0.84 (0.52-1.35)           | 1.24 (0.6-2.56)      | 2.23 (1.19-4.19) | 2.31E-01                         | 3.94E-01         | 9.76E-01   |
| rs1544582  | PRKAR2B      | 7   | 106,475,074 | 0.47             | Add                        | 1.1 (0.8-1.51)             | 2.67 (1.23-5.82)     | 1.73 (1.1-2.72)  | 1.86E-01                         | 3.71E-01         | 9.76E-01   |
| rs267405   | DRD1         | 5   | 174,817,158 | 0.42             | Dom                        | 1.29 (0.8-2.08)            | 1.38 (0.62-3.08)     | 2 (1.16-3.45)    | 4.56E-01                         | 3.88E-01         | 9.76E-01   |
| rs267406   | DRD1         | 5   | 174,817,347 | 0.42             | Dom                        | 1.29 (0.8-2.08)            | 1.38 (0.62-3.08)     | 2 (1.16-3.45)    | 4.56E-01                         | 3.88E-01         | 9.76E-01   |
| rs2196128  | CHRNA6       | 8   | 42,737,443  | 0.21             | Dom                        | 1.19 (0.75-1.88)           | 1.9 (1.06-3.41)      | 1.53 (0.75-3.1)  | 6.38E-01                         | 6.99E-01         | 9.77E-01   |
| rs6265     | BDNF         | 11  | 27,636,492  | 0.18             | Add                        | 0.78 (0.5-1.2)             | 1.6 (0.94-2.75)      | 1.99 (0.96-4.14) | 6.24E-01                         | 4.50E-01         | 9.77E-01   |

**Supplemental Table 1: SNP-Specific Results for Abstinence Rates at End of Treatment**

| SNP        | Gene        | Chr | Position    | MAF <sup>a</sup> | Genetic Model <sup>b</sup> | SNP Odds Ratio<br>(95% CI) | Treatment Odds Ratio |                  | Test of Interaction <sup>c</sup> | LRT <sup>d</sup> |            |
|------------|-------------|-----|-------------|------------------|----------------------------|----------------------------|----------------------|------------------|----------------------------------|------------------|------------|
|            |             |     |             |                  |                            |                            | WT (95% CI)          | Variant (95% CI) |                                  | Observed P       | Adjusted P |
| rs748283   | CHRNA2      | 8   | 27,373,112  | 0.49             | Add                        | 1.04 (0.77-1.42)           | 1.21 (0.58-2.55)     | 1.78 (1.14-2.8)  | 2.21E-01                         | 4.44E-01         | 9.77E-01   |
| rs2267366  | PRKCABP     | 22  | 36,810,605  | 0.16             | Add                        | 0.93 (0.61-1.44)           | 2.1 (1.23-3.58)      | 1.22 (0.58-2.55) | 2.21E-01                         | 4.23E-01         | 9.78E-01   |
| rs10819611 | FREQ (NCS1) | 9   | 131,995,274 | 0.30             | Add                        | 0.84 (0.6-1.18)            | 2.34 (1.29-4.25)     | 1.43 (0.84-2.44) | 1.57E-01                         | 1.97E-01         | 9.78E-01   |
| rs4938016  | ANKK1       | 11  | 112,775,225 | 0.32             | Dom                        | 1.15 (0.73-1.81)           | 2.07 (1.04-4.11)     | 1.57 (0.86-2.87) | 5.58E-01                         | 7.33E-01         | 9.78E-01   |
| rs4789189  | GRB2        | 17  | 70,909,580  | 0.20             | Dom                        | 0.87 (0.54-1.38)           | 1.47 (0.84-2.57)     | 2.49 (1.16-5.36) | 2.77E-01                         | 4.87E-01         | 9.78E-01   |
| rs7271854  | GNAS        | 20  | 56,880,417  | 0.41             | Add                        | 1.07 (0.77-1.5)            | 1.54 (0.75-3.16)     | 1.74 (1.09-2.77) | 7.30E-01                         | 8.53E-01         | 9.78E-01   |
| rs896307   | DDC         | 7   | 50,536,554  | 0.20             | Add                        | 1.09 (0.69-1.73)           | 2.19 (1.25-3.83)     | 1.26 (0.66-2.41) | 1.34E-01                         | 3.23E-01         | 9.78E-01   |
| rs7790758  | DDC         | 7   | 50,529,038  | 0.20             | Add                        | 1.09 (0.69-1.73)           | 2.19 (1.25-3.83)     | 1.26 (0.66-2.41) | 1.34E-01                         | 3.23E-01         | 9.78E-01   |
| rs896309   | DDC         | 7   | 50,512,516  | 0.20             | Add                        | 1.09 (0.69-1.73)           | 2.19 (1.25-3.83)     | 1.26 (0.66-2.41) | 1.34E-01                         | 3.23E-01         | 9.78E-01   |
| rs7815010  | CHRNA2      | 8   | 27,386,013  | 0.25             | Add                        | 0.85 (0.58-1.24)           | 1.53 (0.87-2.71)     | 2.12 (1.14-3.93) | 4.07E-01                         | 5.43E-01         | 9.78E-01   |
| rs6466157  | PRKAR2B     | 7   | 106,519,537 | 0.48             | Add                        | 0.91 (0.66-1.25)           | 2.32 (1.09-4.91)     | 1.75 (1.11-2.75) | 3.90E-01                         | 5.68E-01         | 9.79E-01   |
| rs7122454  | DRD2        | 11  | 112,832,678 | 0.15             | Add                        | 1.02 (0.64-1.62)           | 1.41 (0.84-2.38)     | 3.05 (1.34-6.94) | 1.11E-01                         | 2.47E-01         | 9.79E-01   |
| rs130016   | CREBBP      | 16  | 3,730,308   | 0.50             | Dom                        | 0.68 (0.11-4.01)           | 0.24 (0.01-8.47)     | 1.81 (1.15-2.85) | 2.69E-01                         | 5.40E-01         | 9.79E-01   |
| rs267400   | DRD1        | 5   | 174,815,305 | 0.43             | Dom                        | 1.27 (0.79-2.06)           | 1.41 (0.63-3.13)     | 1.96 (1.14-3.39) | 5.00E-01                         | 4.35E-01         | 9.79E-01   |
| rs2734848  | ANKK1       | 11  | 112,775,584 | 0.17             | Add                        | 0.72 (0.44-1.17)           | 1.55 (0.91-2.65)     | 2.9 (1.22-6.85)  | 2.15E-01                         | 2.49E-01         | 9.79E-01   |
| rs9825563  | DRD3        | 3   | 115,382,910 | 0.31             | Add                        | 0.78 (0.5-1.22)            | 1.89 (1.02-3.51)     | 1.71 (1-2.91)    | 6.12E-01                         | 4.50E-01         | 9.79E-01   |
| rs1076562  | DRD2        | 11  | 112,801,218 | 0.24             | Dom                        | 1.16 (0.73-1.82)           | 1.97 (1.07-3.62)     | 1.56 (0.8-3.07)  | 6.18E-01                         | 7.43E-01         | 9.79E-01   |
| rs9444584  | CNR1        | 6   | 88,919,278  | 0.22             | Add                        | 1.17 (0.81-1.68)           | 1.98 (1.12-3.49)     | 1.55 (0.85-2.81) | 5.10E-01                         | 5.90E-01         | 9.80E-01   |
| rs10093964 | CHRNA2      | 8   | 27,367,957  | 0.43             | Add                        | 0.95 (0.7-1.3)             | 2.49 (1.23-5.05)     | 1.68 (1.06-2.65) | 2.20E-01                         | 4.18E-01         | 9.80E-01   |
| rs1476879  | PRKAR2B     | 7   | 106,485,977 | 0.47             | Add                        | 1.11 (0.81-1.53)           | 2.62 (1.2-5.71)      | 1.73 (1.1-2.72)  | 2.07E-01                         | 3.88E-01         | 9.80E-01   |
| rs12652860 | SLC6A3      | 5   | 1,506,772   | 0.28             | Add                        | 1.29 (0.93-1.8)            | 2.02 (1.09-3.74)     | 1.66 (0.99-2.78) | 5.64E-01                         | 2.89E-01         | 9.80E-01   |
| rs12154324 | PRKAR2B     | 7   | 106,508,168 | 0.09             | Add                        | 0.96 (0.53-1.73)           | 1.57 (0.96-2.55)     | 3.16 (1.03-9.71) | 2.57E-01                         | 5.04E-01         | 9.81E-01   |
| rs4821733  | PRKCABP     | 22  | 36,779,340  | 0.44             | Dom                        | 1.28 (0.79-2.08)           | 1.46 (0.65-3.31)     | 1.91 (1.11-3.27) | 5.97E-01                         | 4.84E-01         | 9.81E-01   |
| rs3756450  | SLC6A3      | 5   | 1,501,148   | 0.11             | Dom                        | 0.68 (0.38-1.22)           | 1.9 (1.15-3.13)      | 1.24 (0.43-3.56) | 4.71E-01                         | 2.97E-01         | 9.81E-01   |
| rs6598007  | DRD4        | 11  | 646,523     | 0.06             | Add                        | 1.14 (0.6-2.16)            | 1.95 (1.2-3.18)      | 0.92 (0.28-3.02) | 2.50E-01                         | 5.04E-01         | 9.82E-01   |
| rs9909076  | GRB2        | 17  | 70,896,404  | 0.20             | Dom                        | 0.85 (0.53-1.36)           | 1.46 (0.84-2.56)     | 2.4 (1.11-5.19)  | 3.11E-01                         | 5.02E-01         | 9.82E-01   |
| rs2053156  | GRB2        | 17  | 70,890,035  | 0.20             | Dom                        | 0.85 (0.53-1.36)           | 1.46 (0.84-2.56)     | 2.4 (1.11-5.19)  | 3.11E-01                         | 5.02E-01         | 9.82E-01   |
| rs2975292  | SLC6A3      | 5   | 1,472,932   | 0.34             | Add                        | 0.97 (0.67-1.39)           | 1.82 (0.93-3.57)     | 1.79 (1.06-3.01) | 9.65E-01                         | 9.82E-01         | 9.82E-01   |
| rs6064716  | GNAS        | 20  | 56,877,541  | 0.13             | Add                        | 1.09 (0.7-1.71)            | 1.77 (1.06-2.94)     | 1.73 (0.78-3.83) | 9.63E-01                         | 9.27E-01         | 9.82E-01   |
| rs4789178  | GRB2        | 17  | 70,879,837  | 0.20             | Dom                        | 0.84 (0.53-1.35)           | 1.48 (0.85-2.59)     | 2.41 (1.11-5.21) | 3.22E-01                         | 5.03E-01         | 9.83E-01   |
| rs908867   | BDNF        | 11  | 27,702,340  | 0.10             | Add                        | 1.21 (0.74-1.99)           | 1.93 (1.17-3.18)     | 1.24 (0.5-3.06)  | 3.86E-01                         | 4.88E-01         | 9.83E-01   |
| rs834829   | NR4A2       | 2   | 156,909,095 | 0.31             | Dom                        | 1.06 (0.68-1.66)           | 1.45 (0.76-2.79)     | 2.08 (1.12-3.88) | 4.34E-01                         | 6.90E-01         | 9.83E-01   |
| rs6960842  | PRKAR2B     | 7   | 106,502,556 | 0.42             | Add                        | 0.85 (0.62-1.18)           | 2.07 (1.03-4.15)     | 1.7 (1.07-2.71)  | 5.49E-01                         | 5.09E-01         | 9.83E-01   |
| rs9322446  | OPRM1       | 6   | 154,450,395 | 0.15             | Add                        | 1.02 (0.66-1.56)           | 1.85 (1.1-3.13)      | 1.57 (0.75-3.28) | 7.00E-01                         | 9.27E-01         | 9.83E-01   |
| rs2299419  | PRKAR2B     | 7   | 106,506,772 | 0.09             | Add                        | 0.82 (0.46-1.45)           | 1.85 (1.14-3.02)     | 1.36 (0.47-3.97) | 6.03E-01                         | 6.42E-01         | 9.83E-01   |
| rs11737901 | SLC6A3      | 5   | 1,483,616   | 0.34             | Dom                        | 1.04 (0.66-1.65)           | 1.77 (0.85-3.65)     | 1.77 (1-3.15)    | 9.91E-01                         | 9.83E-01         | 9.83E-01   |
| rs2297853  | EPB41L2     | 6   | 131,318,638 | 0.35             | Dom                        | 1.27 (0.8-2.01)            | 2.54 (1.22-5.27)     | 1.36 (0.76-2.42) | 1.88E-01                         | 2.88E-01         | 9.83E-01   |
| rs167771   | DRD3        | 3   | 115,358,965 | 0.19             | Dom                        | 1.01 (0.64-1.62)           | 2.11 (1.2-3.71)      | 1.26 (0.59-2.67) | 2.80E-01                         | 5.58E-01         | 9.84E-01   |
| rs510587   | OPRM1       | 6   | 154,455,121 | 0.05             | Add                        | 1.33 (0.68-2.61)           | 1.96 (1.22-3.17)     | 0.76 (0.21-2.69) | 1.63E-01                         | 2.74E-01         | 9.84E-01   |

**Supplemental Table 1: SNP-Specific Results for Abstinence Rates at End of Treatment**

| SNP        | Gene        | Chr | Position    | MAF <sup>a</sup> | Genetic Model <sup>b</sup> | SNP Odds Ratio<br>(95% CI) | Treatment Odds Ratio |                   | Test of Interaction <sup>c</sup> | LRT <sup>d</sup> |            |
|------------|-------------|-----|-------------|------------------|----------------------------|----------------------------|----------------------|-------------------|----------------------------------|------------------|------------|
|            |             |     |             |                  |                            |                            | WT (95% CI)          | Variant (95% CI)  |                                  | Observed P       | Adjusted P |
| rs618207   | OPRM1       | 6   | 154,466,362 | 0.35             | Add                        | 0.99 (0.71-1.38)           | 2.58 (1.34-4.96)     | 1.49 (0.91-2.43)  | 1.06E-01                         | 2.55E-01         | 9.84E-01   |
| rs1853384  | OPRM1       | 6   | 154,466,651 | 0.35             | Add                        | 0.99 (0.71-1.38)           | 2.58 (1.34-4.96)     | 1.49 (0.91-2.43)  | 1.06E-01                         | 2.55E-01         | 9.84E-01   |
| rs12072831 | EPB41       | 1   | 29,265,747  | 0.15             | Dom                        | 0.95 (0.57-1.6)            | 1.76 (1.05-2.95)     | 1.79 (0.71-4.47)  | 9.75E-01                         | 9.84E-01         | 9.84E-01   |
| rs3857051  | SNCA        | 4   | 90,862,720  | 0.08             | Dom                        | 1.15 (0.6-2.17)            | 1.54 (0.94-2.51)     | 3.93 (1.2-12.89)  | 1.53E-01                         | 3.21E-01         | 9.84E-01   |
| rs10003708 | SNCA        | 4   | 90,862,074  | 0.08             | Dom                        | 1.15 (0.6-2.17)            | 1.54 (0.94-2.51)     | 3.93 (1.2-12.89)  | 1.53E-01                         | 3.21E-01         | 9.84E-01   |
| rs11931074 | SNCA        | 4   | 90,858,538  | 0.08             | Dom                        | 1.15 (0.6-2.17)            | 1.54 (0.94-2.51)     | 3.93 (1.2-12.89)  | 1.53E-01                         | 3.21E-01         | 9.84E-01   |
| rs356220   | SNCA        | 4   | 90,860,363  | 0.36             | Dom                        | 1.13 (0.69-1.85)           | 0.96 (0.44-2.06)     | 1.98 (1.06-3.7)   | 1.49E-01                         | 2.88E-01         | 9.84E-01   |
| rs12803    | NR4A2       | 2   | 156,890,171 | 0.47             | Dom                        | 1.12 (0.83-1.53)           | 2.09 (0.88-4.94)     | 1.64 (0.97-2.79)  | 9.35E-01                         | 7.44E-01         | 9.84E-01   |
| rs613355   | OPRM1       | 6   | 154,491,542 | 0.35             | Add                        | 0.96 (0.69-1.34)           | 2.53 (1.32-4.85)     | 1.5 (0.91-2.46)   | 1.27E-01                         | 2.69E-01         | 9.85E-01   |
| rs9367621  | HCRTR2      | 6   | 55,148,249  | 0.45             | Add                        | 1.34 (0.97-1.84)           | 1.81 (0.84-3.94)     | 1.73 (1.1-2.72)   | 8.81E-01                         | 1.97E-01         | 9.85E-01   |
| rs2076370  | PRKCABP     | 22  | 36,793,914  | 0.39             | Add                        | 0.99 (0.71-1.36)           | 1.67 (0.85-3.28)     | 1.76 (1.09-2.82)  | 8.75E-01                         | 9.85E-01         | 9.85E-01   |
| rs10835210 | BDNF        | 11  | 27,652,486  | 0.48             | Add                        | 0.74 (0.45-1.21)           | 1.65 (0.79-3.44)     | 1.8 (1.14-2.84)   | 7.18E-01                         | 4.57E-01         | 9.85E-01   |
| rs943552   | NTRK1       | 1   | 155,122,242 | 0.07             | Dom                        | 1.11 (0.57-2.16)           | 1.63 (1.01-2.64)     | 2.75 (0.78-9.6)   | 4.46E-01                         | 6.83E-01         | 9.85E-01   |
| rs2630349  | DRD3        | 3   | 115,356,062 | 0.07             | Add                        | 1.02 (0.54-1.93)           | 1.59 (0.99-2.57)     | 3.39 (0.98-11.73) | 2.60E-01                         | 4.74E-01         | 9.85E-01   |
| rs2630350  | DRD3        | 3   | 115,357,686 | 0.07             | Add                        | 1.02 (0.54-1.93)           | 1.59 (0.99-2.57)     | 3.39 (0.98-11.73) | 2.60E-01                         | 4.74E-01         | 9.85E-01   |
| rs324032   | DRD3        | 3   | 115,360,518 | 0.07             | Add                        | 1.02 (0.54-1.93)           | 1.59 (0.99-2.57)     | 3.39 (0.98-11.73) | 2.60E-01                         | 4.74E-01         | 9.85E-01   |
| rs7766029  | CNR1        | 6   | 88,904,154  | 0.48             | Dom                        | 1.07 (0.64-1.78)           | 1.01 (0.42-2.45)     | 2.12 (1.25-3.61)  | 1.59E-01                         | 3.57E-01         | 9.85E-01   |
| rs943551   | NTRK1       | 1   | 155,122,121 | 0.07             | Dom                        | 1.12 (0.58-2.17)           | 1.64 (1.01-2.66)     | 2.74 (0.78-9.59)  | 4.54E-01                         | 6.87E-01         | 9.86E-01   |
| rs3775423  | SNCA        | 4   | 90,876,514  | 0.08             | Dom                        | 1.15 (0.61-2.19)           | 1.54 (0.94-2.5)      | 3.86 (1.18-12.69) | 1.61E-01                         | 3.30E-01         | 9.86E-01   |
| rs8135665  | PRKCABP     | 22  | 36,806,222  | 0.20             | Dom                        | 1.08 (0.74-1.58)           | 2.05 (1.14-3.7)      | 1.49 (0.7-3.17)   | 2.38E-01                         | 4.92E-01         | 9.86E-01   |
| rs2440390  | DRD2        | 11  | 112,792,088 | 0.14             | Dom                        | 0.69 (0.4-1.19)            | 1.58 (0.95-2.63)     | 2.36 (0.89-6.29)  | 4.77E-01                         | 3.30E-01         | 9.86E-01   |
| rs356219   | SNCA        | 4   | 90,856,624  | 0.38             | Dom                        | 1.06 (0.67-1.68)           | 1.13 (0.54-2.35)     | 2.3 (1.3-4.08)    | 1.34E-01                         | 2.99E-01         | 9.86E-01   |
| rs1145831  | HTR1B       | 6   | 78,217,292  | 0.22             | Add                        | 1.14 (0.79-1.66)           | 1.85 (1.05-3.25)     | 1.65 (0.89-3.04)  | 7.68E-01                         | 7.73E-01         | 9.86E-01   |
| rs512053   | OPRM1       | 6   | 154,481,209 | 0.09             | Add                        | 1.25 (0.71-2.22)           | 1.56 (0.96-2.55)     | 3.05 (1.05-8.87)  | 2.60E-01                         | 3.05E-01         | 9.87E-01   |
| rs6454672  | CNR1        | 6   | 88,918,289  | 0.14             | Dom                        | 0.86 (0.51-1.44)           | 2 (1.19-3.38)        | 1.18 (0.48-2.91)  | 3.22E-01                         | 5.01E-01         | 9.87E-01   |
| rs10445364 | CRHR1       | 17  | 41,272,136  | 0.20             | Dom                        | 1.12 (0.7-1.78)            | 1.46 (0.83-2.56)     | 2.48 (1.17-5.25)  | 2.70E-01                         | 4.59E-01         | 9.87E-01   |
| rs6413429  | SLC6A3      | 5   | 1,500,027   | 0.06             | Add                        | 0.59 (0.27-1.29)           | 1.68 (1.05-2.69)     | 2.74 (0.61-12.32) | 5.43E-01                         | 3.54E-01         | 9.87E-01   |
| rs806375   | CNR1        | 6   | 88,915,240  | 0.46             | Add                        | 0.97 (0.72-1.31)           | 1.21 (0.6-2.45)      | 1.84 (1.17-2.9)   | 1.78E-01                         | 3.98E-01         | 9.87E-01   |
| rs1557123  | FREQ (NCS1) | 9   | 132,042,979 | 0.08             | Dom                        | 0.8 (0.41-1.57)            | 2.02 (1.23-3.32)     | 0.66 (0.2-2.26)   | 9.90E-02                         | 2.26E-01         | 9.87E-01   |
| rs1491850  | BDNF        | 11  | 27,706,301  | 0.37             | Add                        | 1.09 (0.77-1.54)           | 1.49 (0.75-2.96)     | 1.88 (1.16-3.03)  | 5.07E-01                         | 6.92E-01         | 9.88E-01   |
| rs4603829  | CHRNA4      | 20  | 61,439,336  | 0.36             | Dom                        | 1.09 (0.69-1.71)           | 1.39 (0.69-2.79)     | 2.08 (1.16-3.76)  | 3.83E-01                         | 6.16E-01         | 9.88E-01   |
| rs4311511  | HCRTR2      | 6   | 55,198,566  | 0.29             | Add                        | 0.81 (0.56-1.18)           | 1.35 (0.75-2.45)     | 2.35 (1.3-4.24)   | 1.48E-01                         | 2.23E-01         | 9.88E-01   |
| rs3735275  | DDC         | 7   | 50,484,765  | 0.17             | Dom                        | 1.04 (0.64-1.68)           | 1.89 (1.1-3.24)      | 1.49 (0.66-3.35)  | 6.32E-01                         | 8.89E-01         | 9.88E-01   |
| rs2399496  | DRD3        | 3   | 115,328,703 | 0.48             | Add                        | 0.92 (0.67-1.26)           | 2.02 (0.94-4.32)     | 1.74 (1.11-2.73)  | 6.48E-01                         | 7.65E-01         | 9.88E-01   |
| rs6532191  | SNCA        | 4   | 90,964,953  | 0.50             | Dom                        | 0.9 (0.53-1.51)            | 0.93 (0.38-2.3)      | 2.14 (1.27-3.61)  | 1.18E-01                         | 2.92E-01         | 9.88E-01   |
| rs988748   | BDNF        | 11  | 27,681,321  | 0.20             | Add                        | 0.83 (0.55-1.25)           | 1.74 (1.01-3.01)     | 1.72 (0.87-3.39)  | 9.74E-01                         | 6.52E-01         | 9.88E-01   |
| rs9350712  | HTR1B       | 6   | 78,220,836  | 0.46             | Dom                        | 1.14 (0.69-1.88)           | 1.47 (0.63-3.42)     | 1.93 (1.13-3.3)   | 5.93E-01                         | 7.48E-01         | 9.88E-01   |
| rs806368   | CNR1        | 6   | 88,906,819  | 0.21             | Dom                        | 0.77 (0.48-1.24)           | 1.47 (0.84-2.57)     | 2.49 (1.14-5.42)  | 2.82E-01                         | 3.58E-01         | 9.88E-01   |
| rs806366   | CNR1        | 6   | 88,904,308  | 0.48             | Dom                        | 0.77 (0.47-1.25)           | 2.45 (1.07-5.58)     | 1.54 (0.9-2.64)   | 3.56E-01                         | 3.43E-01         | 9.88E-01   |



**Supplemental Table 1: SNP-Specific Results for Abstinence Rates at End of Treatment**

| SNP        | Gene        | Chr | Position    | MAF <sup>a</sup> | Genetic Model <sup>b</sup> | SNP Odds Ratio<br>(95% CI) | Treatment Odds Ratio |                   | Test of Interaction <sup>c</sup> | LRT <sup>d</sup> |            |
|------------|-------------|-----|-------------|------------------|----------------------------|----------------------------|----------------------|-------------------|----------------------------------|------------------|------------|
|            |             |     |             |                  |                            |                            | WT (95% CI)          | Variant (95% CI)  |                                  | Observed P       | Adjusted P |
| rs4350602  | GRB2        | 17  | 70,867,364  | 0.31             | Add                        | 1.01 (0.72-1.42)           | 1.82 (0.97-3.4)      | 1.73 (1.03-2.89)  | 8.88E-01                         | 9.88E-01         | 9.88E-01   |
| rs540825   | OPRM1       | 6   | 154,456,139 | 0.25             | Add                        | 0.87 (0.6-1.25)            | 2.19 (1.24-3.87)     | 1.4 (0.77-2.55)   | 2.37E-01                         | 2.97E-01         | 9.88E-01   |
| rs883473   | CHRNA7      | 15  | 30,112,968  | 0.31             | Dom                        | 1.05 (0.67-1.64)           | 1.63 (0.86-3.09)     | 1.87 (0.99-3.53)  | 7.68E-01                         | 9.29E-01         | 9.89E-01   |
| rs4559942  | GRB2        | 17  | 70,820,864  | 0.27             | Dom                        | 0.87 (0.56-1.37)           | 1.41 (0.77-2.61)     | 2.25 (1.15-4.4)   | 3.19E-01                         | 5.42E-01         | 9.89E-01   |
| rs9867325  | NCK1        | 3   | 138,101,599 | 0.23             | Dom                        | 0.9 (0.57-1.42)            | 1.7 (0.96-3.03)      | 1.85 (0.89-3.85)  | 8.57E-01                         | 8.95E-01         | 9.89E-01   |
| rs4809538  | CHRNA4      | 20  | 61,440,620  | 0.21             | Add                        | 1.06 (0.73-1.55)           | 1.97 (1.12-3.46)     | 1.54 (0.84-2.83)  | 5.24E-01                         | 7.85E-01         | 9.89E-01   |
| rs7037293  | FREQ (NCS1) | 9   | 132,002,538 | 0.13             | Add                        | 0.67 (0.4-1.12)            | 1.55 (0.94-2.56)     | 2.72 (1.05-7.08)  | 2.90E-01                         | 1.98E-01         | 9.89E-01   |
| rs12718574 | DDC         | 7   | 50,541,342  | 0.44             | Dom                        | 0.87 (0.53-1.42)           | 2.75 (1.2-6.29)      | 1.44 (0.84-2.47)  | 2.00E-01                         | 3.28E-01         | 9.89E-01   |
| rs806365   | CNR1        | 6   | 88,902,668  | 0.46             | Add                        | 0.92 (0.67-1.27)           | 2.07 (0.98-4.35)     | 1.66 (1.05-2.62)  | 5.12E-01                         | 6.88E-01         | 9.89E-01   |
| rs1876828  | CRHR1       | 17  | 41,267,306  | 0.20             | Add                        | 1.24 (0.83-1.86)           | 1.62 (0.91-2.89)     | 2.23 (1.15-4.31)  | 4.40E-01                         | 4.22E-01         | 9.89E-01   |
| rs165774   | COMT        | 22  | 18,332,561  | 0.33             | Dom                        | 0.7 (0.44-1.09)            | 1.93 (1.01-3.66)     | 1.56 (0.82-2.97)  | 6.54E-01                         | 2.40E-01         | 9.89E-01   |
| rs4240446  | FREQ (NCS1) | 9   | 132,018,220 | 0.14             | Add                        | 0.74 (0.44-1.23)           | 1.45 (0.86-2.46)     | 3.14 (1.22-8.13)  | 1.52E-01                         | 2.04E-01         | 9.89E-01   |
| rs9375785  | EPB41L2     | 6   | 131,316,601 | 0.17             | Add                        | 1.03 (0.67-1.57)           | 1.79 (1.05-3.06)     | 1.73 (0.85-3.54)  | 9.36E-01                         | 9.89E-01         | 9.89E-01   |
| rs760973   | PRKCABP     | 22  | 36,777,212  | 0.44             | Dom                        | 1.32 (0.8-2.18)            | 1.9 (0.8-4.52)       | 1.73 (1.02-2.94)  | 8.56E-01                         | 5.43E-01         | 9.90E-01   |
| rs9909443  | GRB2        | 17  | 70,819,941  | 0.26             | Dom                        | 0.86 (0.55-1.35)           | 1.45 (0.79-2.64)     | 2.27 (1.14-4.52)  | 3.32E-01                         | 5.37E-01         | 9.90E-01   |
| rs2734849  | ANKK1       | 11  | 112,775,370 | 0.49             | Add                        | 1.05 (0.77-1.44)           | 1.28 (0.6-2.73)      | 1.75 (1.11-2.75)  | 3.27E-01                         | 5.60E-01         | 9.90E-01   |
| rs6494223  | CHRNA7      | 15  | 30,183,749  | 0.38             | Dom                        | 1 (0.63-1.59)              | 1.14 (0.55-2.34)     | 2.32 (1.29-4.16)  | 1.34E-01                         | 3.23E-01         | 9.90E-01   |
| rs8065441  | GRB2        | 17  | 70,922,042  | 0.15             | Dom                        | 0.81 (0.49-1.34)           | 1.55 (0.91-2.62)     | 2.26 (0.94-5.42)  | 4.69E-01                         | 5.66E-01         | 9.90E-01   |
| rs5751579  | GNAZ        | 22  | 21,759,224  | 0.27             | Add                        | 1.27 (0.91-1.78)           | 1.77 (0.97-3.24)     | 1.69 (0.99-2.89)  | 8.92E-01                         | 3.88E-01         | 9.90E-01   |
| rs9902966  | GRB2        | 17  | 70,873,742  | 0.20             | Dom                        | 0.83 (0.52-1.34)           | 1.46 (0.84-2.56)     | 2.26 (1.04-4.91)  | 3.77E-01                         | 5.36E-01         | 9.90E-01   |
| rs1150144  | NR4A2       | 2   | 156,886,749 | 0.31             | Add                        | 0.93 (0.66-1.33)           | 1.54 (0.83-2.85)     | 1.93 (1.13-3.3)   | 5.32E-01                         | 7.94E-01         | 9.90E-01   |
| rs6578993  | TH          | 11  | 2,157,739   | 0.14             | Dom                        | 1.3 (0.8-2.13)             | 2.01 (1.17-3.45)     | 1.32 (0.58-3.04)  | 4.11E-01                         | 4.34E-01         | 9.90E-01   |
| rs1519479  | BDNF        | 11  | 27,624,107  | 0.47             | Dom                        | 1.15 (0.83-1.59)           | 1.37 (0.57-3.31)     | 1.92 (1.14-3.24)  | 7.58E-01                         | 6.48E-01         | 9.90E-01   |
| rs81189    | CRHR1       | 17  | 41,250,579  | 0.48             | Add                        | 0.99 (0.6-1.63)            | 2.01 (0.94-4.29)     | 1.75 (1.11-2.74)  | 4.56E-01                         | 7.58E-01         | 9.90E-01   |
| rs17016188 | SNCA        | 4   | 90,940,903  | 0.06             | Dom                        | 1.03 (0.5-2.11)            | 1.56 (0.97-2.52)     | 4.34 (1.09-17.21) | 1.71E-01                         | 3.70E-01         | 9.90E-01   |
| rs8140265  | COMT        | 22  | 18,301,641  | 0.27             | Add                        | 1.19 (0.82-1.71)           | 1.38 (0.75-2.54)     | 2.14 (1.23-3.73)  | 2.37E-01                         | 3.32E-01         | 9.90E-01   |
| rs6532190  | SNCA        | 4   | 90,938,219  | 0.06             | Dom                        | 1.03 (0.5-2.11)            | 1.56 (0.97-2.52)     | 4.34 (1.09-17.21) | 1.71E-01                         | 3.70E-01         | 9.90E-01   |
| rs963468   | DRD3        | 3   | 115,345,577 | 0.39             | Add                        | 0.88 (0.63-1.22)           | 1.7 (0.86-3.34)      | 1.77 (1.1-2.86)   | 8.98E-01                         | 7.33E-01         | 9.91E-01   |
| rs8081778  | GRB2        | 17  | 70,823,867  | 0.19             | Dom                        | 0.92 (0.58-1.47)           | 1.48 (0.85-2.58)     | 2.39 (1.11-5.16)  | 3.22E-01                         | 5.92E-01         | 9.91E-01   |
| rs2023239  | CNR1        | 6   | 88,917,201  | 0.18             | Add                        | 1.15 (0.77-1.71)           | 1.93 (1.11-3.35)     | 1.53 (0.78-2.98)  | 5.77E-01                         | 7.07E-01         | 9.91E-01   |
| rs7648198  | NCK1        | 3   | 138,154,451 | 0.47             | Add                        | 0.98 (0.72-1.35)           | 1.19 (0.57-2.5)      | 1.8 (1.14-2.84)   | 2.07E-01                         | 4.48E-01         | 9.91E-01   |
| rs4788891  | GRB2        | 17  | 70,902,740  | 0.19             | Dom                        | 0.87 (0.55-1.39)           | 1.5 (0.86-2.61)      | 2.33 (1.08-5.06)  | 3.64E-01                         | 5.85E-01         | 9.91E-01   |
| rs12527143 | HTR1B       | 6   | 78,221,317  | 0.20             | Add                        | 0.92 (0.57-1.48)           | 1.55 (0.9-2.67)      | 2.2 (1.09-4.45)   | 2.66E-01                         | 5.25E-01         | 9.91E-01   |
| rs2095961  | EPB41L2     | 6   | 131,325,953 | 0.35             | Dom                        | 1.24 (0.78-1.97)           | 2.54 (1.22-5.29)     | 1.38 (0.78-2.45)  | 1.98E-01                         | 3.21E-01         | 9.91E-01   |
| rs806371   | CNR1        | 6   | 88,913,082  | 0.12             | Dom                        | 1.04 (0.6-1.81)            | 1.5 (0.9-2.49)       | 3.14 (1.14-8.6)   | 2.00E-01                         | 3.99E-01         | 9.91E-01   |
| rs1213366  | HTR1B       | 6   | 78,233,589  | 0.43             | Add                        | 1.22 (0.88-1.7)            | 1.3 (0.62-2.73)      | 1.81 (1.15-2.86)  | 3.18E-01                         | 2.70E-01         | 9.92E-01   |
| rs6484320  | BDNF        | 11  | 27,659,764  | 0.19             | Add                        | 0.83 (0.55-1.26)           | 1.75 (1.02-3.03)     | 1.7 (0.86-3.36)   | 9.38E-01                         | 6.77E-01         | 9.92E-01   |
| rs3829905  | FREQ (NCS1) | 9   | 132,024,932 | 0.35             | Add                        | 0.98 (0.7-1.37)            | 2.07 (1.06-4.05)     | 2.06 (1.22-3.48)  | 9.85E-01                         | 9.92E-01         | 9.92E-01   |
| rs174697   | COMT        | 22  | 18,333,832  | 0.05             | Dom                        | 0.92 (0.42-1.98)           | 1.69 (1.06-2.72)     | 2.27 (0.52-9.96)  | 7.12E-01                         | 9.11E-01         | 9.92E-01   |

**Supplemental Table 1: SNP-Specific Results for Abstinence Rates at End of Treatment**

| SNP        | Gene        | Chr | Position    | MAF <sup>a</sup> | Genetic Model <sup>b</sup> | SNP Odds Ratio<br>(95% CI) | Treatment Odds Ratio |                   | Test of Interaction <sup>c</sup> | LRT <sup>d</sup> |            |
|------------|-------------|-----|-------------|------------------|----------------------------|----------------------------|----------------------|-------------------|----------------------------------|------------------|------------|
|            |             |     |             |                  |                            |                            | WT (95% CI)          | Variant (95% CI)  |                                  | Observed P       | Adjusted P |
| rs7932167  | DRD4        | 11  | 610,599     | 0.21             | Add                        | 1.18 (0.8-1.72)            | 1.76 (1-3.11)        | 1.64 (0.88-3.07)  | 8.59E-01                         | 7.13E-01         | 9.92E-01   |
| rs835648   | NCK1        | 3   | 138,154,194 | 0.30             | Dom                        | 1 (0.7-1.43)               | 1.49 (0.78-2.86)     | 2.04 (1.09-3.8)   | 4.05E-01                         | 7.02E-01         | 9.92E-01   |
| rs10456181 | HCRTR2      | 6   | 55,148,655  | 0.35             | Dom                        | 0.8 (0.51-1.26)            | 2.46 (1.23-4.91)     | 1.36 (0.75-2.46)  | 2.00E-01                         | 2.38E-01         | 9.92E-01   |
| rs2133965  | CHRNA7      | 15  | 30,171,846  | 0.07             | Add                        | 0.96 (0.49-1.91)           | 1.53 (0.95-2.47)     | 4.55 (1.24-16.72) | 1.21E-01                         | 2.72E-01         | 9.92E-01   |
| rs1213370  | HTR1B       | 6   | 78,235,516  | 0.47             | Dom                        | 0.91 (0.55-1.51)           | 2.86 (1.2-6.82)      | 1.46 (0.86-2.47)  | 1.95E-01                         | 3.65E-01         | 9.92E-01   |
| rs12946365 | GRB2        | 17  | 70,829,239  | 0.27             | Dom                        | 0.88 (0.56-1.38)           | 1.47 (0.79-2.71)     | 2.14 (1.1-4.16)   | 4.19E-01                         | 6.44E-01         | 9.92E-01   |
| rs7924316  | TH          | 11  | 2,130,023   | 0.48             | Dom                        | 1.02 (0.62-1.67)           | 1.05 (0.45-2.41)     | 2.14 (1.25-3.67)  | 1.59E-01                         | 3.67E-01         | 9.92E-01   |
| rs737865   | COMT        | 22  | 18,310,121  | 0.27             | Add                        | 1.15 (0.8-1.66)            | 1.38 (0.75-2.54)     | 2.19 (1.26-3.81)  | 2.13E-01                         | 3.47E-01         | 9.93E-01   |
| rs1805300  | NCK1        | 3   | 138,058,932 | 0.32             | Dom                        | 0.9 (0.58-1.41)            | 1.43 (0.74-2.76)     | 2.1 (1.13-3.9)    | 4.04E-01                         | 6.64E-01         | 9.93E-01   |
| rs4678448  | NCK1        | 3   | 138,053,879 | 0.32             | Dom                        | 0.9 (0.58-1.41)            | 1.43 (0.74-2.76)     | 2.1 (1.13-3.9)    | 4.04E-01                         | 6.64E-01         | 9.93E-01   |
| rs2030324  | BDNF        | 11  | 27,683,491  | 0.46             | Add                        | 1.12 (0.81-1.54)           | 1.75 (0.81-3.8)      | 1.77 (1.13-2.78)  | 9.80E-01                         | 8.02E-01         | 9.93E-01   |
| rs2611605  | CHRNA7      | 15  | 30,228,925  | 0.20             | Dom                        | 1.17 (0.78-1.75)           | 1.44 (0.82-2.52)     | 2.73 (1.27-5.9)   | 1.73E-01                         | 2.66E-01         | 9.93E-01   |
| rs7122246  | DRD2        | 11  | 112,809,667 | 0.42             | Dom                        | 0.86 (0.53-1.37)           | 2.33 (1.07-5.07)     | 1.55 (0.89-2.71)  | 4.02E-01                         | 5.15E-01         | 9.93E-01   |
| rs2329340  | DDC         | 7   | 50,587,723  | 0.33             | Add                        | 1.26 (0.91-1.76)           | 1.86 (0.96-3.58)     | 1.73 (1.06-2.82)  | 8.38E-01                         | 3.77E-01         | 9.93E-01   |
| rs8079197  | GRB2        | 17  | 70,828,274  | 0.27             | Dom                        | 0.87 (0.56-1.37)           | 1.49 (0.8-2.75)      | 2.13 (1.09-4.15)  | 4.38E-01                         | 6.50E-01         | 9.93E-01   |
| rs2337980  | CHRNA7      | 15  | 30,231,488  | 0.44             | Add                        | 1.27 (0.77-2.08)           | 1.57 (0.75-3.26)     | 1.78 (1.13-2.8)   | 8.79E-01                         | 6.17E-01         | 9.93E-01   |
| rs10915208 | EPB41       | 1   | 29,102,916  | 0.11             | Dom                        | 1.4 (0.83-2.37)            | 1.88 (1.12-3.15)     | 1.34 (0.53-3.39)  | 5.38E-01                         | 4.22E-01         | 9.93E-01   |
| rs3787137  | CHRNA4      | 20  | 61,449,544  | 0.41             | Dom                        | 1.2 (0.72-1.99)            | 2.46 (1.03-5.9)      | 1.57 (0.9-2.74)   | 3.97E-01                         | 6.00E-01         | 9.94E-01   |
| rs9352483  | HTR1B       | 6   | 78,246,975  | 0.15             | Add                        | 1.02 (0.65-1.62)           | 1.49 (0.89-2.5)      | 2.67 (1.16-6.11)  | 2.24E-01                         | 3.93E-01         | 9.94E-01   |
| rs835637   | NCK1        | 3   | 138,155,847 | 0.45             | Dom                        | 1.01 (0.73-1.39)           | 2.49 (1.04-5.98)     | 1.53 (0.9-2.59)   | 2.32E-01                         | 4.88E-01         | 9.94E-01   |
| rs9881139  | NCK1        | 3   | 138,116,730 | 0.39             | Add                        | 0.94 (0.67-1.3)            | 1.39 (0.71-2.72)     | 1.9 (1.17-3.06)   | 3.58E-01                         | 6.16E-01         | 9.94E-01   |
| rs12203487 | HTR1B       | 6   | 78,215,602  | 0.13             | Dom                        | 1.05 (0.62-1.78)           | 1.6 (0.96-2.68)      | 2.37 (0.93-6)     | 4.72E-01                         | 7.38E-01         | 9.94E-01   |
| rs1044396  | CHRNA4      | 20  | 61,451,578  | 0.44             | Dom                        | 0.98 (0.58-1.63)           | 2.54 (1.04-6.18)     | 1.47 (0.85-2.57)  | 3.10E-01                         | 5.65E-01         | 9.94E-01   |
| rs2811228  | HCRTR2      | 6   | 55,260,768  | 0.38             | Dom                        | 0.99 (0.62-1.57)           | 1.7 (0.81-3.53)      | 1.78 (1.01-3.15)  | 9.14E-01                         | 9.94E-01         | 9.94E-01   |
| rs4792825  | CRHR1       | 17  | 41,275,461  | 0.13             | Add                        | 1.11 (0.69-1.78)           | 2.03 (1.22-3.39)     | 1.11 (0.48-2.56)  | 2.09E-01                         | 4.44E-01         | 9.94E-01   |
| rs1213371  | HTR1B       | 6   | 78,236,764  | 0.43             | Add                        | 1.22 (0.88-1.69)           | 1.34 (0.64-2.82)     | 1.84 (1.17-2.91)  | 3.37E-01                         | 2.96E-01         | 9.94E-01   |
| rs6479643  | DBH         | 9   | 135,504,489 | 0.38             | Add                        | 1.07 (0.78-1.46)           | 1.78 (0.91-3.5)      | 1.78 (1.1-2.85)   | 9.91E-01                         | 9.24E-01         | 9.94E-01   |
| rs13212041 | HTR1B       | 6   | 78,227,843  | 0.19             | Add                        | 1.17 (0.78-1.76)           | 2.19 (1.24-3.84)     | 1.26 (0.64-2.44)  | 1.89E-01                         | 3.64E-01         | 9.94E-01   |
| rs1213365  | HTR1B       | 6   | 78,233,274  | 0.50             | Add                        | 1.56 (0.87-2.82)           | 1.34 (0.58-3.13)     | 1.6 (1-2.57)      | 5.03E-01                         | 2.80E-01         | 9.94E-01   |
| rs756632   | GNAZ        | 22  | 21,799,918  | 0.15             | Dom                        | 0.78 (0.46-1.33)           | 1.58 (0.94-2.67)     | 2.73 (1.07-6.99)  | 3.23E-01                         | 4.49E-01         | 9.94E-01   |
| rs6938321  | CNR1        | 6   | 88,892,773  | 0.12             | Dom                        | 0.79 (0.46-1.36)           | 1.86 (1.12-3.08)     | 1.44 (0.54-3.83)  | 6.48E-01                         | 5.93E-01         | 9.94E-01   |
| rs2811239  | HCRTR2      | 6   | 55,229,913  | 0.17             | Add                        | 1.33 (0.89-1.99)           | 2.03 (1.16-3.55)     | 1.49 (0.77-2.89)  | 4.56E-01                         | 2.78E-01         | 9.94E-01   |
| rs6297     | HTR1B       | 6   | 78,228,660  | 0.14             | Add                        | 1.1 (0.7-1.75)             | 2.12 (1.25-3.61)     | 1.11 (0.5-2.45)   | 1.68E-01                         | 3.72E-01         | 9.94E-01   |
| rs6784005  | NCK1        | 3   | 138,095,451 | 0.31             | Add                        | 1.03 (0.71-1.5)            | 1.24 (0.64-2.43)     | 1.89 (1.08-3.3)   | 2.81E-01                         | 5.44E-01         | 9.94E-01   |
| rs9359271  | HTR1B       | 6   | 78,222,839  | 0.27             | Dom                        | 0.78 (0.5-1.22)            | 1.9 (1.04-3.49)      | 1.58 (0.8-3.12)   | 6.92E-01                         | 4.88E-01         | 9.94E-01   |
| rs10767664 | BDNF        | 11  | 27,682,562  | 0.19             | Dom                        | 0.84 (0.52-1.35)           | 1.92 (1.1-3.36)      | 1.43 (0.67-3.07)  | 5.45E-01                         | 6.17E-01         | 9.94E-01   |
| rs3777457  | EPB41L2     | 6   | 131,291,580 | 0.17             | Dom                        | 0.98 (0.6-1.58)            | 2.18 (1.26-3.76)     | 1.1 (0.49-2.45)   | 1.69E-01                         | 3.80E-01         | 9.94E-01   |
| rs885964   | GNAZ        | 22  | 21,791,003  | 0.45             | Dom                        | 0.92 (0.57-1.48)           | 1.44 (0.65-3.17)     | 1.9 (1.1-3.3)     | 5.70E-01                         | 8.14E-01         | 9.95E-01   |
| rs7862394  | FREQ (NCS1) | 9   | 131,989,685 | 0.32             | Add                        | 0.85 (0.54-1.32)           | 2.38 (1.29-4.41)     | 1.46 (0.88-2.44)  | 1.36E-01                         | 2.16E-01         | 9.95E-01   |

**Supplemental Table 1: SNP-Specific Results for Abstinence Rates at End of Treatment**

| SNP        | Gene    | Chr | Position    | MAF <sup>a</sup> | Genetic Model <sup>b</sup> | SNP Odds Ratio<br>(95% CI) | Treatment Odds Ratio |                   | Test of Interaction <sup>c</sup> | LRT <sup>d</sup> |            |
|------------|---------|-----|-------------|------------------|----------------------------|----------------------------|----------------------|-------------------|----------------------------------|------------------|------------|
|            |         |     |             |                  |                            |                            | WT (95% CI)          | Variant (95% CI)  |                                  | Observed P       | Adjusted P |
| rs933063   | EPB41L2 | 6   | 131,225,408 | 0.32             | Dom                        | 1.22 (0.78-1.91)           | 2.35 (1.19-4.64)     | 1.35 (0.73-2.47)  | 2.29E-01                         | 3.71E-01         | 9.95E-01   |
| rs7219     | GRB2    | 17  | 70,826,963  | 0.27             | Dom                        | 0.9 (0.58-1.41)            | 1.44 (0.77-2.66)     | 2.19 (1.13-4.25)  | 3.65E-01                         | 6.21E-01         | 9.95E-01   |
| rs17690326 | CRHR1   | 17  | 41,276,754  | 0.20             | Dom                        | 1.08 (0.68-1.72)           | 1.46 (0.83-2.56)     | 2.38 (1.12-5.05)  | 3.09E-01                         | 5.47E-01         | 9.95E-01   |
| rs6761993  | NCK1    | 3   | 138,108,592 | 0.39             | Dom                        | 0.89 (0.56-1.41)           | 1.37 (0.66-2.84)     | 2.02 (1.13-3.61)  | 4.19E-01                         | 6.57E-01         | 9.95E-01   |
| rs16940646 | CRHR1   | 17  | 41,235,682  | 0.12             | Dom                        | 1.29 (0.76-2.2)            | 1.77 (1.06-2.97)     | 1.8 (0.7-4.64)    | 9.79E-01                         | 6.34E-01         | 9.95E-01   |
| rs10499177 | EPB41L2 | 6   | 131,257,514 | 0.09             | Add                        | 1.15 (0.67-1.99)           | 2.01 (1.22-3.31)     | 1.02 (0.38-2.74)  | 2.21E-01                         | 4.05E-01         | 9.95E-01   |
| rs1039394  | CHRNA7  | 15  | 30,195,021  | 0.05             | Dom                        | 1.2 (0.59-2.47)            | 1.7 (1.05-2.74)      | 2.31 (0.59-9.01)  | 6.77E-01                         | 8.00E-01         | 9.95E-01   |
| rs1079727  | DRD2    | 11  | 112,794,392 | 0.18             | Dom                        | 0.82 (0.54-1.26)           | 1.9 (1.1-3.27)       | 1.52 (0.68-3.39)  | 8.48E-01                         | 6.18E-01         | 9.95E-01   |
| rs2737015  | SNCA    | 4   | 90,964,306  | 0.27             | Add                        | 1.04 (0.71-1.51)           | 1.85 (1.02-3.36)     | 1.68 (0.94-2.98)  | 7.97E-01                         | 9.56E-01         | 9.95E-01   |
| rs1812923  | SNCA    | 4   | 90,958,562  | 0.43             | Dom                        | 0.97 (0.6-1.58)            | 1.07 (0.47-2.39)     | 2.19 (1.27-3.76)  | 1.49E-01                         | 3.54E-01         | 9.95E-01   |
| rs4630328  | DRD2    | 11  | 112,839,419 | 0.35             | Add                        | 0.78 (0.55-1.1)            | 1.64 (0.87-3.11)     | 1.99 (1.17-3.39)  | 6.02E-01                         | 3.58E-01         | 9.95E-01   |
| rs11030104 | BDNF    | 11  | 27,641,093  | 0.19             | Add                        | 0.83 (0.52-1.34)           | 1.73 (1-2.99)        | 1.73 (0.87-3.43)  | 6.01E-01                         | 6.38E-01         | 9.95E-01   |
| rs2798949  | HTR1B   | 6   | 78,246,853  | 0.34             | Add                        | 1.31 (0.82-2.07)           | 1.73 (0.89-3.38)     | 1.81 (1.12-2.93)  | 2.65E-01                         | 3.27E-01         | 9.96E-01   |
| rs12527054 | HTR1B   | 6   | 78,220,647  | 0.07             | Add                        | 0.65 (0.33-1.26)           | 1.76 (1.09-2.84)     | 2.04 (0.57-7.25)  | 8.28E-01                         | 4.11E-01         | 9.96E-01   |
| rs3773678  | DRD3    | 3   | 115,352,768 | 0.15             | Add                        | 1.17 (0.77-1.77)           | 1.78 (1.05-3.01)     | 1.71 (0.82-3.55)  | 9.25E-01                         | 7.69E-01         | 9.96E-01   |
| rs356203   | SNCA    | 4   | 90,885,064  | 0.38             | Dom                        | 1.11 (0.7-1.77)            | 1.21 (0.58-2.54)     | 2.2 (1.25-3.88)   | 2.10E-01                         | 3.76E-01         | 9.96E-01   |
| rs242944   | CRHR1   | 17  | 41,278,960  | 0.43             | Add                        | 1.1 (0.8-1.51)             | 2.47 (1.19-5.14)     | 1.7 (1.07-2.68)   | 2.44E-01                         | 4.49E-01         | 9.96E-01   |
| rs12173930 | HTR1B   | 6   | 78,243,153  | 0.13             | Dom                        | 1.24 (0.75-2.06)           | 1.83 (1.08-3.09)     | 1.6 (0.66-3.85)   | 7.99E-01                         | 7.02E-01         | 9.96E-01   |
| rs9818792  | NCK1    | 3   | 138,072,010 | 0.31             | Add                        | 0.98 (0.69-1.4)            | 1.46 (0.78-2.74)     | 1.95 (1.15-3.3)   | 4.29E-01                         | 7.29E-01         | 9.96E-01   |
| rs1343491  | HTR1B   | 6   | 78,247,981  | 0.08             | Dom                        | 0.76 (0.4-1.42)            | 1.85 (1.13-3.02)     | 1.26 (0.39-4.03)  | 5.48E-01                         | 5.60E-01         | 9.96E-01   |
| rs456082   | SLC6A3  | 5   | 1,483,515   | 0.19             | Dom                        | 0.73 (0.45-1.19)           | 1.71 (0.99-2.94)     | 1.65 (0.73-3.76)  | 9.51E-01                         | 4.34E-01         | 9.96E-01   |
| rs887200   | COMT    | 22  | 18,343,666  | 0.13             | Add                        | 1.32 (0.82-2.11)           | 2.12 (1.23-3.65)     | 1.33 (0.59-2.99)  | 3.31E-01                         | 3.22E-01         | 9.96E-01   |
| rs1433318  | NCK1    | 3   | 138,149,144 | 0.31             | Dom                        | 0.94 (0.6-1.47)            | 1.45 (0.75-2.78)     | 2.11 (1.13-3.92)  | 4.13E-01                         | 7.02E-01         | 9.96E-01   |
| rs10935210 | NCK1    | 3   | 138,133,843 | 0.31             | Dom                        | 0.94 (0.6-1.47)            | 1.45 (0.75-2.78)     | 2.11 (1.13-3.92)  | 4.13E-01                         | 7.02E-01         | 9.96E-01   |
| rs2734833  | DRD2    | 11  | 112,798,130 | 0.42             | Dom                        | 0.84 (0.52-1.35)           | 2.34 (1.08-5.08)     | 1.45 (0.82-2.57)  | 3.34E-01                         | 4.21E-01         | 9.96E-01   |
| rs2266999  | GNAZ    | 22  | 21,781,775  | 0.28             | Add                        | 1.23 (0.87-1.72)           | 1.67 (0.92-3.04)     | 1.76 (1.03-3.03)  | 8.83E-01                         | 4.74E-01         | 9.96E-01   |
| rs9845460  | NCK1    | 3   | 138,069,807 | 0.24             | Add                        | 0.97 (0.66-1.42)           | 1.5 (0.85-2.67)      | 2.09 (1.14-3.84)  | 3.97E-01                         | 6.89E-01         | 9.96E-01   |
| rs9837990  | NCK1    | 3   | 138,115,626 | 0.39             | Add                        | 0.88 (0.55-1.39)           | 1.44 (0.73-2.83)     | 1.87 (1.16-3)     | 3.83E-01                         | 6.08E-01         | 9.96E-01   |
| rs965808   | GNAS    | 20  | 56,841,821  | 0.24             | Add                        | 0.77 (0.53-1.13)           | 1.86 (1.06-3.28)     | 1.67 (0.9-3.1)    | 7.86E-01                         | 3.60E-01         | 9.96E-01   |
| rs915172   | EPB41L2 | 6   | 131,226,463 | 0.31             | Dom                        | 1.1 (0.7-1.73)             | 2.45 (1.25-4.79)     | 1.32 (0.72-2.43)  | 1.82E-01                         | 3.95E-01         | 9.96E-01   |
| rs3810614  | GNAZ    | 22  | 21,767,271  | 0.29             | Add                        | 1.17 (0.82-1.66)           | 1.61 (0.87-3.01)     | 1.94 (1.12-3.38)  | 6.10E-01                         | 5.40E-01         | 9.96E-01   |
| rs1369299  | GRB2    | 17  | 70,858,920  | 0.19             | Dom                        | 0.85 (0.53-1.37)           | 1.56 (0.9-2.71)      | 2.17 (0.99-4.75)  | 5.03E-01                         | 6.64E-01         | 9.96E-01   |
| rs4586205  | DRD2    | 11  | 112,812,339 | 0.25             | Dom                        | 1.25 (0.79-1.97)           | 1.87 (1.01-3.46)     | 1.68 (0.86-3.26)  | 8.13E-01                         | 6.23E-01         | 9.96E-01   |
| rs11772714 | DDC     | 7   | 50,510,337  | 0.20             | Add                        | 1.08 (0.73-1.61)           | 2.1 (1.21-3.66)      | 1.35 (0.7-2.6)    | 2.79E-01                         | 5.38E-01         | 9.96E-01   |
| rs2471851  | DRD2    | 11  | 112,806,279 | 0.18             | Add                        | 0.79 (0.52-1.21)           | 1.87 (1.1-3.19)      | 1.61 (0.77-3.35)  | 7.27E-01                         | 4.72E-01         | 9.96E-01   |
| rs6015389  | GNAS    | 20  | 56,860,121  | 0.36             | Dom                        | 0.74 (0.47-1.17)           | 2.19 (1.1-4.38)      | 1.44 (0.79-2.64)  | 3.72E-01                         | 2.70E-01         | 9.96E-01   |
| rs4789176  | GRB2    | 17  | 70,864,463  | 0.19             | Dom                        | 0.85 (0.53-1.37)           | 1.56 (0.9-2.71)      | 2.17 (0.99-4.75)  | 5.03E-01                         | 6.64E-01         | 9.97E-01   |
| rs6128461  | GNAS    | 20  | 56,910,485  | 0.39             | Add                        | 1.03 (0.74-1.42)           | 1.44 (0.73-2.82)     | 1.86 (1.15-3)     | 4.43E-01                         | 7.11E-01         | 9.97E-01   |
| rs11575453 | DDC     | 7   | 50,515,359  | 0.08             | Dom                        | 0.9 (0.48-1.68)            | 1.57 (0.96-2.55)     | 3.14 (0.96-10.26) | 2.87E-01                         | 5.47E-01         | 9.97E-01   |

**Supplemental Table 1: SNP-Specific Results for Abstinence Rates at End of Treatment**

| SNP        | Gene        | Chr | Position    | MAF <sup>a</sup> | Genetic Model <sup>b</sup> | SNP Odds Ratio<br>(95% CI) | Treatment Odds Ratio |                   | Test of Interaction <sup>c</sup> | LRT <sup>d</sup> |            |
|------------|-------------|-----|-------------|------------------|----------------------------|----------------------------|----------------------|-------------------|----------------------------------|------------------|------------|
|            |             |     |             |                  |                            |                            | WT (95% CI)          | Variant (95% CI)  |                                  | Observed P       | Adjusted P |
| rs2145288  | GNAS        | 20  | 56,877,604  | 0.28             | Add                        | 0.75 (0.51-1.09)           | 1.57 (0.88-2.83)     | 1.98 (1.1-3.58)   | 5.50E-01                         | 2.85E-01         | 9.97E-01   |
| rs6775389  | NCK1        | 3   | 138,142,414 | 0.31             | Dom                        | 0.93 (0.59-1.46)           | 1.45 (0.75-2.79)     | 2.08 (1.12-3.88)  | 4.27E-01                         | 7.11E-01         | 9.97E-01   |
| rs1865149  | NCK1        | 3   | 138,078,300 | 0.31             | Dom                        | 0.93 (0.59-1.46)           | 1.45 (0.75-2.79)     | 2.08 (1.12-3.88)  | 4.27E-01                         | 7.11E-01         | 9.97E-01   |
| rs9846691  | NCK1        | 3   | 138,088,961 | 0.31             | Dom                        | 0.93 (0.59-1.46)           | 1.45 (0.75-2.79)     | 2.08 (1.12-3.88)  | 4.27E-01                         | 7.11E-01         | 9.97E-01   |
| rs4678274  | NCK1        | 3   | 138,121,927 | 0.31             | Dom                        | 0.93 (0.59-1.46)           | 1.45 (0.75-2.79)     | 2.08 (1.12-3.88)  | 4.27E-01                         | 7.11E-01         | 9.97E-01   |
| rs938525   | NCK1        | 3   | 138,064,643 | 0.31             | Dom                        | 0.93 (0.59-1.46)           | 1.45 (0.75-2.79)     | 2.08 (1.12-3.88)  | 4.27E-01                         | 7.11E-01         | 9.97E-01   |
| rs12330283 | NCK1        | 3   | 138,073,101 | 0.31             | Dom                        | 0.93 (0.59-1.46)           | 1.45 (0.75-2.79)     | 2.08 (1.12-3.88)  | 4.27E-01                         | 7.11E-01         | 9.97E-01   |
| rs514980   | OPRM1       | 6   | 154,409,860 | 0.22             | Add                        | 1.28 (0.87-1.86)           | 1.59 (0.9-2.83)      | 1.99 (1.09-3.64)  | 5.62E-01                         | 3.68E-01         | 9.97E-01   |
| rs7131056  | DRD2        | 11  | 112,834,984 | 0.45             | Add                        | 1.09 (0.8-1.5)             | 2.47 (1.17-5.23)     | 1.71 (1.09-2.7)   | 2.65E-01                         | 5.00E-01         | 9.97E-01   |
| rs1076560  | ANKK1       | 11  | 112,788,898 | 0.18             | Add                        | 0.81 (0.53-1.23)           | 1.85 (1.08-3.15)     | 1.66 (0.8-3.44)   | 8.09E-01                         | 5.36E-01         | 9.97E-01   |
| rs6350     | SLC6A3      | 5   | 1,496,199   | 0.06             | Add                        | 0.67 (0.31-1.43)           | 1.65 (1.03-2.65)     | 3.16 (0.72-13.94) | 4.13E-01                         | 4.48E-01         | 9.97E-01   |
| rs6026593  | GNAS        | 20  | 56,912,528  | 0.11             | Add                        | 0.67 (0.39-1.14)           | 1.77 (1.08-2.91)     | 1.51 (0.57-4.02)  | 7.76E-01                         | 2.95E-01         | 9.97E-01   |
| rs7786398  | DDC         | 7   | 50,580,400  | 0.45             | Dom                        | 1.3 (0.77-2.19)            | 2.37 (0.94-5.96)     | 1.62 (0.96-2.73)  | 4.83E-01                         | 5.33E-01         | 9.97E-01   |
| rs1858746  | GNAZ        | 22  | 21,763,804  | 0.28             | Add                        | 1.21 (0.85-1.72)           | 1.77 (0.95-3.32)     | 1.75 (1-3.05)     | 9.70E-01                         | 5.77E-01         | 9.97E-01   |
| rs8137828  | COMT        | 22  | 18,303,406  | 0.49             | Dom                        | 0.92 (0.67-1.26)           | 1.74 (0.75-4.06)     | 1.76 (1.03-2.99)  | 5.59E-01                         | 7.05E-01         | 9.97E-01   |
| rs4947535  | DDC         | 7   | 50,499,175  | 0.28             | Dom                        | 0.91 (0.58-1.43)           | 2.08 (1.12-3.86)     | 1.47 (0.76-2.84)  | 4.48E-01                         | 6.62E-01         | 9.97E-01   |
| rs1799978  | DRD2        | 11  | 112,851,561 | 0.06             | Dom                        | 1.5 (0.77-2.9)             | 1.88 (1.16-3.07)     | 1.31 (0.38-4.49)  | 5.91E-01                         | 4.17E-01         | 9.97E-01   |
| rs10743149 | TH          | 11  | 2,150,751   | 0.14             | Dom                        | 0.83 (0.5-1.38)            | 1.85 (1.1-3.11)      | 1.57 (0.64-3.83)  | 7.54E-01                         | 7.00E-01         | 9.97E-01   |
| rs151331   | GNAS        | 20  | 56,925,899  | 0.30             | Add                        | 1.09 (0.76-1.55)           | 1.33 (0.72-2.47)     | 2.09 (1.21-3.61)  | 2.20E-01                         | 3.84E-01         | 9.97E-01   |
| rs11238131 | DDC         | 7   | 50,506,083  | 0.28             | Dom                        | 0.9 (0.58-1.41)            | 2.07 (1.11-3.83)     | 1.49 (0.77-2.87)  | 4.73E-01                         | 6.71E-01         | 9.97E-01   |
| rs10002435 | SNCA        | 4   | 90,931,534  | 0.11             | Dom                        | 1.25 (0.72-2.17)           | 1.58 (0.95-2.62)     | 2.8 (1.05-7.49)   | 3.09E-01                         | 4.51E-01         | 9.97E-01   |
| rs2652510  | SLC6A3      | 5   | 1,500,860   | 0.40             | Add                        | 1.14 (0.83-1.58)           | 2.46 (1.21-5)        | 1.67 (1.04-2.66)  | 2.37E-01                         | 3.85E-01         | 9.97E-01   |
| rs7867364  | FREQ (NCS1) | 9   | 132,040,103 | 0.17             | Dom                        | 0.94 (0.57-1.54)           | 2.21 (1.29-3.79)     | 1 (0.43-2.32)     | 1.21E-01                         | 2.62E-01         | 9.97E-01   |
| rs234623   | GNAS        | 20  | 56,922,359  | 0.48             | Dom                        | 1.38 (0.8-2.39)            | 2.59 (0.96-6.98)     | 1.6 (0.96-2.66)   | 3.94E-01                         | 4.03E-01         | 9.97E-01   |
| rs9788657  | CHRNA7      | 15  | 30,182,318  | 0.20             | Add                        | 0.77 (0.51-1.17)           | 1.8 (1.04-3.11)      | 1.59 (0.8-3.15)   | 7.69E-01                         | 4.21E-01         | 9.97E-01   |
| rs8030315  | CHRNA7      | 15  | 30,184,411  | 0.20             | Add                        | 0.77 (0.51-1.17)           | 1.8 (1.04-3.11)      | 1.59 (0.8-3.15)   | 7.69E-01                         | 4.21E-01         | 9.97E-01   |
| rs6026561  | GNAS        | 20  | 56,860,527  | 0.36             | Dom                        | 0.76 (0.48-1.2)            | 2.23 (1.12-4.45)     | 1.45 (0.79-2.64)  | 3.52E-01                         | 2.98E-01         | 9.97E-01   |
| rs4987059  | DRD4        | 11  | 626,433     | 0.05             | Add                        | 1.22 (0.59-2.52)           | 1.68 (1.04-2.7)      | 2.57 (0.63-10.45) | 5.73E-01                         | 7.04E-01         | 9.97E-01   |
| rs4947644  | DDC         | 7   | 50,586,370  | 0.50             | Dom                        | 1.06 (0.61-1.82)           | 2.99 (1.12-7.97)     | 1.5 (0.9-2.51)    | 2.22E-01                         | 4.60E-01         | 9.97E-01   |
| rs2343662  | NCK1        | 3   | 138,083,736 | 0.31             | Dom                        | 0.92 (0.59-1.44)           | 1.46 (0.76-2.81)     | 2.07 (1.11-3.84)  | 4.49E-01                         | 7.24E-01         | 9.97E-01   |
| rs868437   | CHRNA7      | 15  | 30,111,569  | 0.29             | Dom                        | 1.12 (0.71-1.74)           | 1.67 (0.89-3.13)     | 1.87 (0.98-3.57)  | 8.10E-01                         | 8.52E-01         | 9.97E-01   |
| rs10033209 | SNCA        | 4   | 90,872,727  | 0.08             | Add                        | 1.18 (0.69-2.02)           | 1.58 (0.97-2.57)     | 2.83 (1.04-7.67)  | 2.83E-01                         | 5.09E-01         | 9.97E-01   |
| rs2301134  | SNCA        | 4   | 90,977,968  | 0.49             | Dom                        | 0.95 (0.56-1.59)           | 1.03 (0.42-2.51)     | 2.09 (1.24-3.53)  | 1.76E-01                         | 4.03E-01         | 9.97E-01   |
| rs7118900  | ANKK1       | 11  | 112,772,031 | 0.20             | Dom                        | 0.88 (0.59-1.31)           | 2.1 (1.2-3.68)       | 1.24 (0.58-2.65)  | 2.88E-01                         | 4.09E-01         | 9.97E-01   |
| rs3773679  | DRD3        | 3   | 115,352,025 | 0.39             | Add                        | 0.85 (0.54-1.35)           | 1.63 (0.83-3.2)      | 1.8 (1.11-2.9)    | 5.38E-01                         | 6.86E-01         | 9.97E-01   |
| rs7164518  | CHRNA7      | 15  | 30,249,900  | 0.17             | Dom                        | 0.82 (0.5-1.36)            | 1.65 (0.96-2.83)     | 1.82 (0.78-4.28)  | 8.45E-01                         | 7.42E-01         | 9.97E-01   |
| rs4810148  | GNAS        | 20  | 56,881,306  | 0.34             | Dom                        | 1.15 (0.73-1.81)           | 1.31 (0.65-2.65)     | 2.18 (1.21-3.92)  | 2.81E-01                         | 4.28E-01         | 9.97E-01   |
| rs9306383  | GNAZ        | 22  | 21,751,058  | 0.43             | Dom                        | 0.77 (0.48-1.23)           | 1.49 (0.7-3.18)      | 2.02 (1.14-3.58)  | 5.29E-01                         | 4.92E-01         | 9.97E-01   |
| rs1876829  | CRHR1       | 17  | 41,267,224  | 0.21             | Add                        | 1.24 (0.82-1.87)           | 1.63 (0.89-2.99)     | 1.95 (1.01-3.76)  | 6.68E-01                         | 5.43E-01         | 9.98E-01   |

**Supplemental Table 1: SNP-Specific Results for Abstinence Rates at End of Treatment**

| SNP        | Gene    | Chr | Position    | MAF <sup>a</sup> | Genetic Model <sup>b</sup> | SNP Odds Ratio (95% CI) | Treatment Odds Ratio |                   | Test of Interaction <sup>c</sup> | LRT <sup>d</sup> |            |
|------------|---------|-----|-------------|------------------|----------------------------|-------------------------|----------------------|-------------------|----------------------------------|------------------|------------|
|            |         |     |             |                  |                            |                         | WT (95% CI)          | Variant (95% CI)  |                                  | Observed P       | Adjusted P |
| rs3827315  | GNAZ    | 22  | 21,752,890  | 0.29             | Add                        | 1.2 (0.86-1.68)         | 1.65 (0.9-3.02)      | 1.87 (1.1-3.18)   | 7.17E-01                         | 4.99E-01         | 9.98E-01   |
| rs8027814  | CHRNA7  | 15  | 30,137,964  | 0.29             | Dom                        | 1.1 (0.71-1.72)         | 1.69 (0.9-3.18)      | 1.83 (0.96-3.49)  | 8.71E-01                         | 8.91E-01         | 9.98E-01   |
| rs409588   | SLC6A3  | 5   | 1,483,834   | 0.19             | Dom                        | 0.75 (0.46-1.22)        | 1.78 (1.04-3.05)     | 1.75 (0.77-3.95)  | 9.73E-01                         | 4.91E-01         | 9.98E-01   |
| rs8035668  | CHRNA7  | 15  | 30,178,638  | 0.20             | Add                        | 0.78 (0.51-1.17)        | 1.81 (1.05-3.14)     | 1.58 (0.8-3.14)   | 7.44E-01                         | 4.31E-01         | 9.98E-01   |
| rs739362   | GNAZ    | 22  | 21,774,067  | 0.28             | Add                        | 1.2 (0.84-1.7)          | 1.75 (0.95-3.25)     | 1.85 (1.06-3.23)  | 8.85E-01                         | 5.68E-01         | 9.98E-01   |
| rs904952   | CHRNA7  | 15  | 30,206,037  | 0.48             | Add                        | 0.89 (0.54-1.46)        | 1.26 (0.6-2.65)      | 1.82 (1.15-2.87)  | 1.32E-01                         | 3.00E-01         | 9.98E-01   |
| rs13054985 | GNAZ    | 22  | 21,788,577  | 0.45             | Dom                        | 0.9 (0.56-1.45)         | 1.39 (0.63-3.1)      | 1.96 (1.14-3.39)  | 4.89E-01                         | 7.35E-01         | 9.98E-01   |
| rs4820537  | GNAZ    | 22  | 21,794,810  | 0.47             | Add                        | 0.99 (0.73-1.35)        | 1.78 (0.86-3.71)     | 1.76 (1.12-2.76)  | 9.65E-01                         | 9.98E-01         | 9.98E-01   |
| rs6589377  | DRD2    | 11  | 112,860,946 | 0.35             | Add                        | 0.8 (0.56-1.13)         | 1.6 (0.85-3.03)      | 1.93 (1.14-3.26)  | 6.10E-01                         | 4.34E-01         | 9.98E-01   |
| rs1470750  | DDC     | 7   | 50,544,142  | 0.42             | Dom                        | 0.8 (0.5-1.28)          | 2.23 (1.04-4.78)     | 1.55 (0.88-2.7)   | 4.51E-01                         | 4.48E-01         | 9.98E-01   |
| rs7934165  | BDNF    | 11  | 27,688,559  | 0.46             | Add                        | 1.12 (0.81-1.55)        | 1.75 (0.81-3.8)      | 1.77 (1.12-2.77)  | 9.80E-01                         | 7.91E-01         | 9.98E-01   |
| rs3122153  | HCRTR2  | 6   | 55,184,612  | 0.22             | Add                        | 0.79 (0.53-1.17)        | 1.5 (0.87-2.58)      | 2.26 (1.16-4.41)  | 3.14E-01                         | 3.13E-01         | 9.98E-01   |
| rs10891556 | DRD2    | 11  | 112,857,971 | 0.17             | Dom                        | 1.24 (0.81-1.89)        | 1.6 (0.92-2.78)      | 2.12 (0.97-4.63)  | 4.34E-01                         | 3.82E-01         | 9.98E-01   |
| rs1124491  | ANKK1   | 11  | 112,787,300 | 0.18             | Add                        | 0.79 (0.52-1.21)        | 1.89 (1.11-3.23)     | 1.58 (0.76-3.28)  | 6.78E-01                         | 4.51E-01         | 9.98E-01   |
| rs11214601 | ANKK1   | 11  | 112,777,972 | 0.18             | Add                        | 0.79 (0.52-1.21)        | 1.89 (1.11-3.23)     | 1.58 (0.76-3.28)  | 6.78E-01                         | 4.51E-01         | 9.98E-01   |
| rs4245148  | DRD2    | 11  | 112,825,629 | 0.10             | Add                        | 1.08 (0.64-1.8)         | 1.98 (1.19-3.29)     | 1.15 (0.46-2.9)   | 2.97E-01                         | 5.29E-01         | 9.98E-01   |
| rs5759593  | GNAZ    | 22  | 21,794,457  | 0.41             | Dom                        | 0.91 (0.58-1.44)        | 1.65 (0.8-3.4)       | 1.85 (1.04-3.28)  | 8.11E-01                         | 9.09E-01         | 9.98E-01   |
| rs12625436 | GNAS    | 20  | 56,878,608  | 0.39             | Add                        | 1.18 (0.84-1.65)        | 1.37 (0.68-2.74)     | 1.88 (1.17-3.03)  | 3.53E-01                         | 3.45E-01         | 9.98E-01   |
| rs4936270  | DRD2    | 11  | 112,823,618 | 0.10             | Add                        | 1.11 (0.66-1.85)        | 2.01 (1.21-3.32)     | 1.1 (0.44-2.77)   | 2.49E-01                         | 4.42E-01         | 9.98E-01   |
| rs7175359  | CHRNA7  | 15  | 30,212,239  | 0.48             | Dom                        | 0.88 (0.54-1.45)        | 1.02 (0.44-2.37)     | 2.19 (1.28-3.75)  | 1.37E-01                         | 3.06E-01         | 9.98E-01   |
| rs4274224  | DRD2    | 11  | 112,824,662 | 0.45             | Dom                        | 1 (0.61-1.63)           | 2.82 (1.22-6.51)     | 1.42 (0.83-2.43)  | 1.77E-01                         | 3.90E-01         | 9.98E-01   |
| rs2737029  | SNCA    | 4   | 90,930,793  | 0.40             | Dom                        | 1.21 (0.76-1.94)        | 1.36 (0.63-2.96)     | 2.04 (1.17-3.55)  | 4.10E-01                         | 4.66E-01         | 9.98E-01   |
| rs3777438  | EPB41L2 | 6   | 131,241,795 | 0.16             | Add                        | 0.89 (0.58-1.37)        | 2.01 (1.18-3.43)     | 1.31 (0.62-2.75)  | 3.28E-01                         | 5.24E-01         | 9.98E-01   |
| rs12419948 | BDNF    | 11  | 27,623,560  | 0.18             | Add                        | 0.87 (0.58-1.33)        | 1.7 (0.99-2.92)      | 1.84 (0.92-3.69)  | 8.49E-01                         | 7.98E-01         | 9.98E-01   |
| rs613341   | OPRM1   | 6   | 154,484,971 | 0.10             | Add                        | 1.14 (0.68-1.92)        | 2.02 (1.22-3.35)     | 1.07 (0.42-2.72)  | 2.30E-01                         | 4.25E-01         | 9.98E-01   |
| rs3822090  | SNCA    | 4   | 90,923,899  | 0.13             | Dom                        | 1.1 (0.65-1.88)         | 1.55 (0.93-2.59)     | 2.75 (1.07-7.02)  | 2.95E-01                         | 5.34E-01         | 9.98E-01   |
| rs9396056  | HCRTR2  | 6   | 55,141,716  | 0.39             | Dom                        | 0.93 (0.58-1.48)        | 2.72 (1.29-5.71)     | 1.34 (0.76-2.37)  | 1.41E-01                         | 2.91E-01         | 9.98E-01   |
| rs754672   | ANKK1   | 11  | 112,754,346 | 0.49             | Dom                        | 0.93 (0.56-1.55)        | 2.83 (1.14-7)        | 1.47 (0.87-2.48)  | 2.20E-01                         | 4.04E-01         | 9.98E-01   |
| rs4587762  | DRD2    | 11  | 112,812,103 | 0.43             | Dom                        | 0.86 (0.54-1.38)        | 2.38 (1.09-5.17)     | 1.48 (0.85-2.59)  | 3.35E-01                         | 4.57E-01         | 9.98E-01   |
| rs3777466  | EPB41L2 | 6   | 131,309,919 | 0.46             | Add                        | 1.04 (0.77-1.41)        | 1.8 (0.87-3.72)      | 1.75 (1.11-2.75)  | 9.25E-01                         | 9.60E-01         | 9.98E-01   |
| rs165599   | COMT    | 22  | 18,336,781  | 0.32             | Add                        | 1.16 (0.83-1.62)        | 2.41 (1.24-4.66)     | 1.59 (0.96-2.63)  | 2.29E-01                         | 3.33E-01         | 9.98E-01   |
| rs4792887  | CRHR1   | 17  | 41,232,791  | 0.12             | Add                        | 1.16 (0.71-1.9)         | 1.75 (1.05-2.9)      | 1.72 (0.7-4.21)   | 9.80E-01                         | 8.33E-01         | 9.98E-01   |
| rs4074461  | CRHR1   | 17  | 41,210,922  | 0.46             | Add                        | 1.11 (0.8-1.52)         | 2.4 (1.13-5.13)      | 1.76 (1.12-2.77)  | 3.41E-01                         | 5.61E-01         | 9.98E-01   |
| rs242939   | CRHR1   | 17  | 41,251,360  | 0.09             | Add                        | 1.18 (0.67-2.1)         | 1.81 (1.11-2.95)     | 1.41 (0.48-4.12)  | 6.71E-01                         | 8.23E-01         | 9.98E-01   |
| rs1800497  | ANKK1   | 11  | 112,776,038 | 0.22             | Dom                        | 0.86 (0.53-1.39)        | 2.09 (1.15-3.8)      | 1.37 (0.64-2.94)  | 3.96E-01                         | 5.27E-01         | 9.98E-01   |
| rs2519148  | DBH     | 9   | 135,484,387 | 0.50             | Add                        | 1.29 (0.93-1.77)        | 1.84 (0.81-4.19)     | 1.83 (1.16-2.89)  | 9.78E-01                         | 3.01E-01         | 9.98E-01   |
| rs11771818 | DDC     | 7   | 50,509,669  | 0.12             | Dom                        | 0.86 (0.5-1.46)         | 1.79 (1.07-2.98)     | 1.63 (0.64-4.19)  | 8.69E-01                         | 8.29E-01         | 9.98E-01   |
| rs157194   | EPB41   | 1   | 29,108,306  | 0.12             | Dom                        | 0.99 (0.57-1.73)        | 1.67 (1.01-2.77)     | 2.14 (0.77-5.9)   | 6.71E-01                         | 9.10E-01         | 9.99E-01   |
| rs11564764 | SLC6A3  | 5   | 1,458,806   | 0.05             | Add                        | 0.76 (0.33-1.76)        | 1.64 (1.03-2.63)     | 3.84 (0.72-20.38) | 3.36E-01                         | 5.73E-01         | 9.99E-01   |

**Supplemental Table 1: SNP-Specific Results for Abstinence Rates at End of Treatment**

| SNP        | Gene        | Chr | Position    | MAF <sup>a</sup> | Genetic Model <sup>b</sup> | SNP Odds Ratio<br>(95% CI) | Treatment Odds Ratio |                   | Test of Interaction <sup>c</sup> | LRT <sup>d</sup> |            |
|------------|-------------|-----|-------------|------------------|----------------------------|----------------------------|----------------------|-------------------|----------------------------------|------------------|------------|
|            |             |     |             |                  |                            |                            | WT (95% CI)          | Variant (95% CI)  |                                  | Observed P       | Adjusted P |
| rs10499695 | DDC         | 7   | 50,586,098  | 0.49             | Dom                        | 1.14 (0.66-1.95)           | 2.87 (1.08-7.6)      | 1.52 (0.91-2.55)  | 2.60E-01                         | 5.06E-01         | 9.99E-01   |
| rs3788341  | GNAZ        | 22  | 21,747,758  | 0.47             | Dom                        | 1.09 (0.66-1.81)           | 2.38 (0.98-5.74)     | 1.58 (0.94-2.68)  | 4.38E-01                         | 7.20E-01         | 9.99E-01   |
| rs4779969  | CHRNA7      | 15  | 30,136,223  | 0.05             | Dom                        | 0.65 (0.28-1.5)            | 1.65 (1.03-2.64)     | 2.89 (0.58-14.39) | 5.14E-01                         | 4.67E-01         | 9.99E-01   |
| rs3842748  | TH          | 11  | 2,137,971   | 0.22             | Dom                        | 1.03 (0.64-1.65)           | 1.51 (0.83-2.73)     | 2.32 (1.09-4.94)  | 3.79E-01                         | 6.59E-01         | 9.99E-01   |
| rs9612237  | GNAZ        | 22  | 21,802,954  | 0.44             | Dom                        | 0.85 (0.53-1.37)           | 1.33 (0.62-2.84)     | 2.04 (1.16-3.58)  | 3.73E-01                         | 5.71E-01         | 9.99E-01   |
| rs4779565  | CHRNA7      | 15  | 30,177,362  | 0.42             | Add                        | 1.05 (0.77-1.44)           | 2.35 (1.15-4.78)     | 1.68 (1.06-2.66)  | 2.99E-01                         | 5.71E-01         | 9.99E-01   |
| rs3730168  | GNAS        | 20  | 56,912,334  | 0.34             | Add                        | 0.8 (0.57-1.12)            | 1.69 (0.91-3.15)     | 1.78 (1.06-2.99)  | 8.89E-01                         | 4.15E-01         | 9.99E-01   |
| rs7290221  | COMT        | 22  | 18,322,680  | 0.48             | Dom                        | 0.78 (0.48-1.27)           | 1.12 (0.49-2.56)     | 2.08 (1.21-3.56)  | 2.21E-01                         | 3.34E-01         | 9.99E-01   |
| rs7356228  | SNCA        | 4   | 90,962,878  | 0.37             | Dom                        | 1.09 (0.69-1.73)           | 1.3 (0.62-2.72)      | 2.08 (1.18-3.67)  | 3.23E-01                         | 5.52E-01         | 9.99E-01   |
| rs2762686  | EPB41       | 1   | 29,188,832  | 0.12             | Dom                        | 0.99 (0.57-1.73)           | 1.66 (1-2.75)        | 2.14 (0.78-5.9)   | 6.63E-01                         | 9.07E-01         | 9.99E-01   |
| rs4789170  | GRB2        | 17  | 70,844,389  | 0.26             | Dom                        | 0.86 (0.55-1.35)           | 1.57 (0.85-2.89)     | 1.98 (1.01-3.88)  | 6.20E-01                         | 7.36E-01         | 9.99E-01   |
| rs760975   | PRKCABP     | 22  | 36,797,730  | 0.39             | Add                        | 0.97 (0.7-1.34)            | 1.61 (0.81-3.19)     | 1.85 (1.15-2.98)  | 6.81E-01                         | 9.08E-01         | 9.99E-01   |
| rs13054331 | GNAZ        | 22  | 21,737,063  | 0.24             | Add                        | 0.84 (0.58-1.23)           | 1.6 (0.91-2.81)      | 1.95 (1.05-3.6)   | 6.12E-01                         | 6.06E-01         | 9.99E-01   |
| rs356164   | SNCA        | 4   | 90,912,499  | 0.16             | Dom                        | 0.96 (0.59-1.56)           | 2 (1.17-3.43)        | 1.29 (0.56-2.93)  | 3.79E-01                         | 6.61E-01         | 9.99E-01   |
| rs2653349  | HCRTR2      | 6   | 55,250,296  | 0.19             | Add                        | 1.25 (0.85-1.84)           | 1.52 (0.87-2.65)     | 2.19 (1.15-4.16)  | 3.61E-01                         | 3.45E-01         | 9.99E-01   |
| rs7867693  | FREQ (NCS1) | 9   | 132,043,625 | 0.11             | Dom                        | 0.78 (0.44-1.36)           | 2 (1.21-3.32)        | 1.04 (0.38-2.87)  | 2.58E-01                         | 3.15E-01         | 9.99E-01   |
| rs4870266  | OPRM1       | 6   | 154,410,691 | 0.07             | Add                        | 1.33 (0.71-2.5)            | 1.65 (1.02-2.69)     | 2.56 (0.79-8.32)  | 5.02E-01                         | 4.99E-01         | 9.99E-01   |
| rs9370403  | HCRTR2      | 6   | 55,189,315  | 0.19             | Add                        | 1.08 (0.71-1.64)           | 1.95 (1.1-3.45)      | 1.65 (0.83-3.26)  | 6.94E-01                         | 8.76E-01         | 9.99E-01   |
| rs129915   | DBH         | 9   | 135,514,739 | 0.29             | Dom                        | 1.37 (0.86-2.2)            | 1.57 (0.78-3.15)     | 1.89 (0.99-3.62)  | 7.04E-01                         | 3.57E-01         | 9.99E-01   |
| rs3822095  | SNCA        | 4   | 90,955,540  | 0.37             | Dom                        | 1.1 (0.69-1.74)            | 1.31 (0.63-2.75)     | 2.08 (1.18-3.67)  | 3.34E-01                         | 5.60E-01         | 9.99E-01   |
| rs242942   | CRHR1       | 17  | 41,247,413  | 0.13             | Add                        | 1.12 (0.69-1.8)            | 1.93 (1.15-3.23)     | 1.32 (0.57-3.05)  | 4.36E-01                         | 7.00E-01         | 9.99E-01   |
| rs11564753 | SLC6A3      | 5   | 1,496,990   | 0.21             | Add                        | 0.79 (0.53-1.18)           | 1.84 (1.07-3.16)     | 1.64 (0.83-3.22)  | 7.73E-01                         | 4.65E-01         | 9.99E-01   |
| rs10902188 | DRD4        | 11  | 644,043     | 0.09             | Add                        | 1.04 (0.59-1.84)           | 1.66 (1.01-2.72)     | 2.25 (0.78-6.53)  | 6.09E-01                         | 8.48E-01         | 9.99E-01   |
| rs1004446  | TH          | 11  | 2,126,719   | 0.38             | Add                        | 1.17 (0.84-1.62)           | 1.96 (0.98-3.94)     | 1.72 (1.07-2.75)  | 6.97E-01                         | 6.31E-01         | 9.99E-01   |
| rs2057291  | GNAS        | 20  | 56,905,438  | 0.37             | Dom                        | 1.07 (0.68-1.68)           | 1.53 (0.75-3.1)      | 1.92 (1.07-3.45)  | 6.29E-01                         | 8.47E-01         | 9.99E-01   |
| rs1323041  | OPRM1       | 6   | 154,480,873 | 0.48             | Dom                        | 1.06 (0.64-1.77)           | 1.7 (0.71-4.05)      | 1.76 (1.04-2.97)  | 9.53E-01                         | 9.70E-01         | 9.99E-01   |
| rs606148   | OPRM1       | 6   | 154,477,679 | 0.10             | Add                        | 1.13 (0.68-1.89)           | 2.01 (1.21-3.33)     | 1.12 (0.45-2.79)  | 2.65E-01                         | 4.81E-01         | 9.99E-01   |
| rs9612234  | GNAZ        | 22  | 21,797,080  | 0.44             | Dom                        | 0.86 (0.54-1.38)           | 1.41 (0.65-3.04)     | 1.98 (1.13-3.45)  | 4.84E-01                         | 6.78E-01         | 9.99E-01   |
| rs9382460  | HCRTR2      | 6   | 55,145,443  | 0.19             | Dom                        | 1.17 (0.73-1.88)           | 2.21 (1.25-3.9)      | 1.17 (0.55-2.48)  | 1.84E-01                         | 3.52E-01         | 9.99E-01   |
| rs10819610 | FREQ (NCS1) | 9   | 131,986,436 | 0.28             | Add                        | 0.94 (0.67-1.31)           | 2.35 (1.29-4.26)     | 1.4 (0.82-2.39)   | 1.34E-01                         | 2.98E-01         | 9.99E-01   |
| rs6026567  | GNAS        | 20  | 56,878,310  | 0.41             | Add                        | 1.09 (0.79-1.51)           | 1.26 (0.63-2.53)     | 1.88 (1.18-3.01)  | 2.30E-01                         | 3.80E-01         | 9.99E-01   |
| rs4789182  | GRB2        | 17  | 70,886,540  | 0.32             | Dom                        | 0.96 (0.61-1.5)            | 1.57 (0.81-3.04)     | 1.91 (1.03-3.54)  | 6.70E-01                         | 9.04E-01         | 9.99E-01   |
| rs607759   | OPRM1       | 6   | 154,414,130 | 0.22             | Add                        | 1.22 (0.84-1.78)           | 1.56 (0.88-2.77)     | 2.02 (1.11-3.69)  | 4.99E-01                         | 4.51E-01         | 9.99E-01   |
| rs2653357  | HCRTR2      | 6   | 55,264,698  | 0.38             | Dom                        | 0.95 (0.6-1.5)             | 1.6 (0.77-3.29)      | 1.85 (1.04-3.28)  | 7.56E-01                         | 9.34E-01         | 9.99E-01   |
| rs356165   | SNCA        | 4   | 90,865,909  | 0.40             | Dom                        | 1.16 (0.7-1.91)            | 1.25 (0.55-2.84)     | 2.08 (1.16-3.71)  | 3.22E-01                         | 4.79E-01         | 9.99E-01   |
| rs16837840 | EPB41       | 1   | 29,207,867  | 0.10             | Dom                        | 1.37 (0.79-2.38)           | 1.8 (1.09-3)         | 1.59 (0.59-4.28)  | 8.27E-01                         | 5.33E-01         | 9.99E-01   |
| rs12038347 | EPB41       | 1   | 29,141,303  | 0.10             | Dom                        | 1.37 (0.79-2.38)           | 1.8 (1.09-3)         | 1.59 (0.59-4.28)  | 8.27E-01                         | 5.33E-01         | 9.99E-01   |
| rs1514246  | CHRNA7      | 15  | 30,106,782  | 0.25             | Add                        | 1.15 (0.82-1.62)           | 1.88 (1.05-3.36)     | 1.79 (1.03-3.1)   | 8.93E-01                         | 7.05E-01         | 9.99E-01   |
| rs242924   | CRHR1       | 17  | 41,241,147  | 0.44             | Dom                        | 0.89 (0.55-1.43)           | 1.55 (0.71-3.38)     | 1.88 (1.08-3.28)  | 6.91E-01                         | 8.33E-01         | 9.99E-01   |

**Supplemental Table 1: SNP-Specific Results for Abstinence Rates at End of Treatment**

| SNP        | Gene    | Chr | Position    | MAF <sup>a</sup> | Genetic Model <sup>b</sup> | SNP Odds Ratio<br>(95% CI) | Treatment Odds Ratio |                   | Test of Interaction <sup>c</sup> | LRT <sup>d</sup> |            |
|------------|---------|-----|-------------|------------------|----------------------------|----------------------------|----------------------|-------------------|----------------------------------|------------------|------------|
|            |         |     |             |                  |                            |                            | WT (95% CI)          | Variant (95% CI)  |                                  | Observed P       | Adjusted P |
| rs6494211  | CHRNA7  | 15  | 30,164,880  | 0.34             | Add                        | 0.78 (0.5-1.22)            | 1.79 (0.96-3.34)     | 1.76 (1.05-2.94)  | 4.76E-01                         | 3.98E-01         | 9.99E-01   |
| rs11765748 | DDC     | 7   | 50,583,110  | 0.49             | Add                        | 1.14 (0.82-1.57)           | 1.51 (0.68-3.35)     | 1.78 (1.13-2.79)  | 6.30E-01                         | 6.09E-01         | 9.99E-01   |
| rs3134705  | HCRTR2  | 6   | 55,182,315  | 0.40             | Dom                        | 0.92 (0.67-1.26)           | 1.87 (0.9-3.88)      | 1.69 (0.95-2.99)  | 6.13E-01                         | 7.82E-01         | 9.99E-01   |
| rs9612225  | GNAZ    | 22  | 21,736,619  | 0.25             | Add                        | 0.87 (0.6-1.27)            | 1.71 (0.96-3.04)     | 1.9 (1.03-3.48)   | 7.90E-01                         | 7.54E-01         | 9.99E-01   |
| rs165656   | COMT    | 22  | 18,328,863  | 0.47             | Add                        | 1.03 (0.76-1.4)            | 1.55 (0.74-3.24)     | 1.81 (1.15-2.86)  | 6.19E-01                         | 8.56E-01         | 9.99E-01   |
| rs1544325  | COMT    | 22  | 18,311,668  | 0.45             | Dom                        | 0.79 (0.49-1.28)           | 1.92 (0.87-4.21)     | 1.7 (0.98-2.95)   | 8.04E-01                         | 6.03E-01         | 9.99E-01   |
| rs9788679  | CHRNA7  | 15  | 30,186,609  | 0.19             | Add                        | 0.81 (0.54-1.22)           | 1.84 (1.07-3.17)     | 1.55 (0.78-3.06)  | 6.78E-01                         | 5.31E-01         | 9.99E-01   |
| rs2653343  | HCRTR2  | 6   | 55,241,285  | 0.19             | Add                        | 1.24 (0.84-1.82)           | 1.53 (0.88-2.67)     | 2.16 (1.14-4.11)  | 3.88E-01                         | 3.83E-01         | 9.99E-01   |
| rs6929837  | HCRTR2  | 6   | 55,244,576  | 0.19             | Add                        | 1.24 (0.84-1.82)           | 1.53 (0.88-2.67)     | 2.16 (1.14-4.11)  | 3.88E-01                         | 3.83E-01         | 1.00E-00   |
| rs8033518  | CHRNA7  | 15  | 30,168,901  | 0.05             | Dom                        | 0.68 (0.3-1.56)            | 1.67 (1.05-2.67)     | 2.68 (0.54-13.41) | 5.80E-01                         | 5.55E-01         | 1.00E-00   |
| rs13148411 | SNCA    | 4   | 90,969,745  | 0.27             | Add                        | 1.03 (0.71-1.49)           | 1.87 (1.03-3.39)     | 1.66 (0.94-2.95)  | 7.63E-01                         | 9.51E-01         | 1.00E-00   |
| rs2583981  | SNCA    | 4   | 90,971,605  | 0.27             | Add                        | 1.03 (0.71-1.49)           | 1.87 (1.03-3.39)     | 1.66 (0.94-2.95)  | 7.63E-01                         | 9.51E-01         | 1.00E-00   |
| rs632395   | OPRM1   | 6   | 154,478,944 | 0.10             | Add                        | 1.1 (0.66-1.82)            | 1.98 (1.19-3.28)     | 1.18 (0.48-2.91)  | 3.18E-01                         | 5.63E-01         | 1.00E-00   |
| rs10457561 | EPB41L2 | 6   | 131,223,025 | 0.16             | Dom                        | 1.08 (0.66-1.77)           | 1.72 (1.01-2.95)     | 1.86 (0.82-4.22)  | 8.83E-01                         | 9.34E-01         | 1.00E-00   |
| rs1800900  | GNAS    | 20  | 56,848,505  | 0.39             | Add                        | 0.79 (0.57-1.11)           | 1.84 (0.92-3.68)     | 1.76 (1.07-2.89)  | 8.91E-01                         | 3.75E-01         | 1.00E-00   |
| rs9479757  | OPRM1   | 6   | 154,453,037 | 0.10             | Add                        | 1.05 (0.63-1.76)           | 1.97 (1.19-3.27)     | 1.17 (0.47-2.93)  | 3.17E-01                         | 5.85E-01         | 1.00E-00   |
| rs1004764  | PRKCABP | 22  | 36,804,798  | 0.39             | Dom                        | 0.97 (0.61-1.53)           | 1.86 (0.88-3.94)     | 1.68 (0.95-2.96)  | 8.29E-01                         | 9.61E-01         | 1.00E-00   |
| rs642489   | OPRM1   | 6   | 154,484,368 | 0.24             | Add                        | 0.92 (0.64-1.33)           | 2.1 (1.19-3.71)      | 1.45 (0.8-2.63)   | 3.21E-01                         | 5.01E-01         | 1.00E-00   |
| rs609148   | OPRM1   | 6   | 154,472,707 | 0.24             | Add                        | 0.92 (0.64-1.33)           | 2.1 (1.19-3.71)      | 1.45 (0.8-2.63)   | 3.21E-01                         | 5.01E-01         | 1.00E-00   |
| rs1413755  | EPB41L2 | 6   | 131,195,892 | 0.37             | Add                        | 0.83 (0.6-1.15)            | 1.61 (0.85-3.05)     | 1.82 (1.11-2.99)  | 7.11E-01                         | 5.08E-01         | 1.00E-00   |
| rs2175886  | CHRNA7  | 15  | 30,143,239  | 0.47             | Add                        | 0.87 (0.64-1.17)           | 1.36 (0.67-2.75)     | 1.81 (1.14-2.86)  | 3.63E-01                         | 4.58E-01         | 1.00E-00   |
| rs6518592  | COMT    | 22  | 18,307,146  | 0.45             | Add                        | 0.9 (0.65-1.23)            | 1.96 (0.96-4)        | 1.75 (1.1-2.76)   | 7.23E-01                         | 7.19E-01         | 1.00E-00   |
| rs504932   | OPRM1   | 6   | 154,472,161 | 0.25             | Add                        | 0.92 (0.64-1.32)           | 2.09 (1.19-3.69)     | 1.45 (0.8-2.63)   | 3.27E-01                         | 5.04E-01         | 1.00E-00   |
| rs6064714  | GNAS    | 20  | 56,847,535  | 0.15             | Dom                        | 0.87 (0.52-1.45)           | 1.68 (1-2.83)        | 2.04 (0.82-5.1)   | 7.21E-01                         | 8.28E-01         | 1.00E-00   |
| rs9321260  | EPB41L2 | 6   | 131,305,235 | 0.19             | Dom                        | 1.11 (0.69-1.77)           | 2.1 (1.2-3.68)       | 1.24 (0.58-2.65)  | 2.72E-01                         | 5.25E-01         | 1.00E-00   |
| rs129883   | DBH     | 9   | 135,514,632 | 0.36             | Add                        | 0.97 (0.68-1.38)           | 1.45 (0.74-2.84)     | 1.91 (1.16-3.16)  | 4.48E-01                         | 7.48E-01         | 1.00E-00   |
| rs11043001 | TH      | 11  | 2,159,621   | 0.15             | Add                        | 1.07 (0.69-1.65)           | 1.95 (1.15-3.32)     | 1.42 (0.67-3.01)  | 4.81E-01                         | 7.54E-01         | 1.00E-00   |
| rs557748   | OPRM1   | 6   | 154,405,995 | 0.22             | Add                        | 1.21 (0.83-1.76)           | 1.6 (0.9-2.83)       | 2.03 (1.11-3.7)   | 5.28E-01                         | 4.93E-01         | 1.00E-00   |
| rs477292   | OPRM1   | 6   | 154,405,080 | 0.22             | Add                        | 1.21 (0.83-1.76)           | 1.6 (0.9-2.83)       | 2.03 (1.11-3.7)   | 5.28E-01                         | 4.93E-01         | 1.00E-00   |
| rs8125112  | GNAS    | 20  | 56,864,560  | 0.16             | Add                        | 1.14 (0.74-1.74)           | 1.48 (0.87-2.53)     | 2.17 (1.02-4.61)  | 3.88E-01                         | 5.14E-01         | 1.00E-00   |
| rs10040882 | SLC6A3  | 5   | 1,471,558   | 0.23             | Add                        | 1.08 (0.74-1.56)           | 1.7 (0.96-3.02)      | 1.8 (0.99-3.29)   | 8.85E-01                         | 9.03E-01         | 1.00E-00   |
| rs11042978 | TH      | 11  | 2,154,994   | 0.48             | Add                        | 0.89 (0.65-1.22)           | 2.19 (1.02-4.67)     | 1.73 (1.1-2.72)   | 4.77E-01                         | 5.55E-01         | 1.00E-00   |
| rs9282821  | OPRM1   | 6   | 154,456,068 | 0.43             | Add                        | 0.85 (0.62-1.17)           | 2.01 (1.01-4)        | 1.73 (1.08-2.75)  | 6.44E-01                         | 5.27E-01         | 1.00E-00   |
| rs623956   | OPRM1   | 6   | 154,471,718 | 0.25             | Add                        | 0.95 (0.65-1.38)           | 2.07 (1.14-3.73)     | 1.34 (0.73-2.48)  | 2.71E-01                         | 4.83E-01         | 1.00E-00   |
| rs9912608  | GRB2    | 17  | 70,848,626  | 0.26             | Dom                        | 0.87 (0.56-1.36)           | 1.62 (0.88-2.97)     | 1.94 (0.99-3.81)  | 6.94E-01                         | 7.83E-01         | 1.00E-00   |
| rs4633     | COMT    | 22  | 18,330,235  | 0.47             | Dom                        | 0.91 (0.56-1.47)           | 1.25 (0.56-2.77)     | 2.04 (1.18-3.52)  | 3.16E-01                         | 5.89E-01         | 1.00E-00   |
| rs3778155  | OPRM1   | 6   | 154,445,511 | 0.17             | Add                        | 1.19 (0.77-1.85)           | 2.05 (1.14-3.66)     | 1.45 (0.71-2.97)  | 4.39E-01                         | 5.45E-01         | 1.00E-00   |
| rs4779563  | CHRNA7  | 15  | 30,124,529  | 0.25             | Add                        | 1.07 (0.75-1.53)           | 2.13 (1.19-3.83)     | 1.46 (0.83-2.59)  | 3.05E-01                         | 5.67E-01         | 1.00E-00   |
| rs928592   | EPB41L2 | 6   | 131,219,792 | 0.29             | Dom                        | 1.05 (0.67-1.64)           | 2.28 (1.2-4.34)      | 1.35 (0.72-2.55)  | 2.56E-01                         | 5.22E-01         | 1.00E-00   |

**Supplemental Table 1: SNP-Specific Results for Abstinence Rates at End of Treatment**

| SNP        | Gene        | Chr | Position    | MAF <sup>a</sup> | Genetic Model <sup>b</sup> | SNP Odds Ratio<br>(95% CI) | Treatment Odds Ratio |                   | Test of Interaction <sup>c</sup> | LRT <sup>d</sup> |            |
|------------|-------------|-----|-------------|------------------|----------------------------|----------------------------|----------------------|-------------------|----------------------------------|------------------|------------|
|            |             |     |             |                  |                            |                            | WT (95% CI)          | Variant (95% CI)  |                                  | Observed P       | Adjusted P |
| rs589046   | OPRM1       | 6   | 154,434,831 | 0.26             | Add                        | 1.06 (0.74-1.51)           | 1.44 (0.8-2.59)      | 2.11 (1.2-3.72)   | 2.96E-01                         | 5.40E-01         | 1.00E-00   |
| rs129884   | DBH         | 9   | 135,514,907 | 0.16             | Add                        | 0.92 (0.59-1.43)           | 1.59 (0.93-2.71)     | 2.15 (1.01-4.58)  | 5.09E-01                         | 7.73E-01         | 1.00E-00   |
| rs3807552  | DDC         | 7   | 50,578,236  | 0.19             | Add                        | 1.09 (0.7-1.7)             | 1.85 (1.03-3.34)     | 1.25 (0.61-2.58)  | 3.90E-01                         | 6.74E-01         | 1.00E-00   |
| rs917690   | FREQ (NCS1) | 9   | 131,974,002 | 0.11             | Add                        | 0.94 (0.54-1.62)           | 1.52 (0.91-2.55)     | 3.26 (1.2-8.83)   | 1.73E-01                         | 3.64E-01         | 1.00E-00   |
| rs495491   | OPRM1       | 6   | 154,424,235 | 0.26             | Add                        | 0.99 (0.69-1.42)           | 1.43 (0.8-2.55)      | 2.13 (1.2-3.77)   | 2.74E-01                         | 5.46E-01         | 1.00E-00   |
| rs12378342 | FREQ (NCS1) | 9   | 131,970,164 | 0.08             | Add                        | 0.98 (0.52-1.85)           | 1.73 (1.07-2.81)     | 1.94 (0.59-6.45)  | 8.59E-01                         | 9.84E-01         | 1.00E-00   |
| rs10456702 | HCRTR2      | 6   | 55,261,975  | 0.45             | Dom                        | 0.93 (0.58-1.52)           | 1.09 (0.49-2.42)     | 2.18 (1.26-3.77)  | 1.58E-01                         | 3.68E-01         | 1.00E-00   |
| rs7175581  | CHRNA7      | 15  | 30,172,759  | 0.43             | Add                        | 0.94 (0.68-1.3)            | 1.42 (0.7-2.88)      | 1.85 (1.16-2.96)  | 4.31E-01                         | 7.04E-01         | 1.00E-00   |
| rs510769   | OPRM1       | 6   | 154,403,712 | 0.26             | Add                        | 1.02 (0.71-1.46)           | 1.43 (0.8-2.56)      | 2.14 (1.21-3.79)  | 2.76E-01                         | 5.40E-01         | 1.00E-00   |
| rs27074    | SLC6A3      | 5   | 1,436,550   | 0.11             | Add                        | 0.83 (0.49-1.4)            | 1.87 (1.13-3.1)      | 1.34 (0.51-3.49)  | 5.40E-01                         | 6.03E-01         | 1.00E-00   |
| rs9322447  | OPRM1       | 6   | 154,466,013 | 0.48             | Add                        | 0.95 (0.69-1.31)           | 1.7 (0.8-3.59)       | 1.77 (1.13-2.78)  | 8.96E-01                         | 9.50E-01         | 1.00E-00   |
| rs6975     | EPB41L2     | 6   | 131,197,795 | 0.26             | Dom                        | 1.28 (0.82-2.01)           | 1.97 (1.05-3.7)      | 1.57 (0.82-3.01)  | 6.22E-01                         | 5.14E-01         | 1.00E-00   |
| rs4646312  | COMT        | 22  | 18,328,337  | 0.37             | Dom                        | 1.13 (0.72-1.77)           | 1.52 (0.74-3.09)     | 1.97 (1.1-3.53)   | 5.74E-01                         | 7.14E-01         | 1.00E-00   |
| rs11564767 | SLC6A3      | 5   | 1,457,704   | 0.06             | Dom                        | 0.75 (0.36-1.59)           | 1.71 (1.07-2.75)     | 2.42 (0.56-10.39) | 6.58E-01                         | 7.25E-01         | 1.00E-00   |
| rs9357853  | HCRTR2      | 6   | 55,213,660  | 0.26             | Add                        | 0.82 (0.56-1.19)           | 1.48 (0.83-2.63)     | 2.13 (1.16-3.93)  | 3.50E-01                         | 4.06E-01         | 1.00E-00   |
| rs648893   | OPRM1       | 6   | 154,480,321 | 0.24             | Add                        | 0.93 (0.65-1.34)           | 2.06 (1.17-3.63)     | 1.42 (0.78-2.58)  | 3.26E-01                         | 5.29E-01         | 1.00E-00   |
| rs7775745  | HCRTR2      | 6   | 55,158,466  | 0.45             | Add                        | 1.24 (0.88-1.73)           | 2.29 (1.03-5.08)     | 1.75 (1.11-2.75)  | 4.37E-01                         | 3.73E-01         | 1.00E-00   |
| rs5756908  | PRKCABP     | 22  | 36,806,525  | 0.48             | Dom                        | 1.21 (0.72-2.03)           | 1.71 (0.69-4.2)      | 1.78 (1.06-2.99)  | 9.37E-01                         | 7.50E-01         | 1.00E-00   |
| rs2975226  | SLC6A3      | 5   | 1,498,616   | 0.39             | Add                        | 1.1 (0.79-1.54)            | 2 (0.98-4.08)        | 1.49 (0.91-2.42)  | 3.77E-01                         | 5.80E-01         | 1.00E-00   |
| rs10438342 | CHRNA7      | 15  | 30,189,338  | 0.38             | Add                        | 1 (0.73-1.37)              | 2.34 (1.18-4.62)     | 1.62 (1.01-2.59)  | 2.55E-01                         | 5.22E-01         | 1.00E-00   |
| rs2839942  | EPB41L2     | 6   | 131,250,191 | 0.31             | Dom                        | 1.22 (0.78-1.91)           | 1.9 (0.98-3.7)       | 1.64 (0.88-3.05)  | 7.47E-01                         | 6.73E-01         | 1.00E-00   |
| rs887199   | COMT        | 22  | 18,341,955  | 0.15             | Dom                        | 1.12 (0.72-1.75)           | 1.9 (1.11-3.24)      | 1.45 (0.62-3.36)  | 5.87E-01                         | 7.53E-01         | 1.00E-00   |
| rs234621   | GNAS        | 20  | 56,923,643  | 0.29             | Add                        | 1.03 (0.72-1.46)           | 1.44 (0.78-2.66)     | 2.02 (1.17-3.49)  | 3.64E-01                         | 6.42E-01         | 1.00E-00   |
| rs2007153  | DBH         | 9   | 135,493,640 | 0.34             | Add                        | 0.94 (0.67-1.32)           | 2.34 (1.21-4.5)      | 1.53 (0.93-2.53)  | 2.26E-01                         | 4.37E-01         | 1.00E-00   |
| rs2652511  | SLC6A3      | 5   | 1,499,389   | 0.39             | Add                        | 1.1 (0.79-1.53)            | 2.11 (1.05-4.23)     | 1.67 (1.04-2.68)  | 4.84E-01                         | 6.77E-01         | 1.00E-00   |
| rs12206057 | EPB41L2     | 6   | 131,254,210 | 0.17             | Add                        | 0.93 (0.61-1.43)           | 1.98 (1.16-3.36)     | 1.39 (0.68-2.87)  | 4.20E-01                         | 6.82E-01         | 1.00E-00   |
| rs4975646  | SLC6A3      | 5   | 1,486,401   | 0.36             | Add                        | 0.92 (0.65-1.3)            | 1.63 (0.84-3.18)     | 1.82 (1.11-2.99)  | 7.63E-01                         | 8.62E-01         | 1.00E-00   |
| rs1076153  | DBH         | 9   | 135,487,964 | 0.20             | Dom                        | 1.05 (0.66-1.69)           | 1.52 (0.87-2.66)     | 2.42 (1.11-5.28)  | 3.40E-01                         | 5.85E-01         | 1.00E-00   |
| rs150089   | EPB41       | 1   | 29,131,901  | 0.32             | Add                        | 1.04 (0.74-1.46)           | 1.83 (0.98-3.43)     | 1.71 (1.02-2.85)  | 8.41E-01                         | 9.59E-01         | 1.00E-00   |
| rs40184    | SLC6A3      | 5   | 1,448,077   | 0.46             | Add                        | 1.09 (0.8-1.49)            | 2.24 (1.04-4.85)     | 1.8 (1.14-2.84)   | 4.98E-01                         | 7.26E-01         | 1.00E-00   |
| rs458334   | SLC6A3      | 5   | 1,483,093   | 0.42             | Add                        | 0.85 (0.62-1.19)           | 1.71 (0.85-3.45)     | 1.77 (1.11-2.83)  | 9.18E-01                         | 6.40E-01         | 1.00E-00   |
| rs2075572  | OPRM1       | 6   | 154,453,697 | 0.44             | Dom                        | 0.91 (0.56-1.46)           | 1.78 (0.81-3.88)     | 1.76 (1.02-3.06)  | 9.87E-01                         | 9.22E-01         | 1.00E-00   |
| rs157213   | EPB41       | 1   | 29,126,858  | 0.12             | Dom                        | 1 (0.57-1.74)              | 1.62 (0.98-2.69)     | 2.15 (0.78-5.93)  | 6.28E-01                         | 8.83E-01         | 1.00E-00   |
| rs3122148  | HCRTR2      | 6   | 55,173,948  | 0.20             | Add                        | 0.82 (0.55-1.22)           | 1.53 (0.89-2.62)     | 2.2 (1.11-4.33)   | 3.77E-01                         | 4.38E-01         | 1.00E-00   |
| rs3778158  | OPRM1       | 6   | 154,447,423 | 0.16             | Add                        | 1.13 (0.74-1.73)           | 1.95 (1.14-3.34)     | 1.46 (0.72-2.99)  | 5.08E-01                         | 6.74E-01         | 1.00E-00   |
| rs12600908 | GRB2        | 17  | 70,839,969  | 0.12             | Dom                        | 1 (0.62-1.62)              | 1.7 (1.02-2.83)      | 1.97 (0.76-5.1)   | 6.57E-01                         | 8.99E-01         | 1.00E-00   |
| rs1799971  | OPRM1       | 6   | 154,402,490 | 0.12             | Add                        | 0.94 (0.57-1.55)           | 1.61 (0.97-2.68)     | 2.33 (0.95-5.7)   | 4.75E-01                         | 7.64E-01         | 1.00E-00   |
| rs1009502  | FREQ (NCS1) | 9   | 131,996,050 | 0.32             | Add                        | 0.97 (0.7-1.34)            | 2.3 (1.23-4.3)       | 1.49 (0.89-2.49)  | 1.88E-01                         | 4.12E-01         | 1.00E-00   |
| rs17209711 | OPRM1       | 6   | 154,438,148 | 0.16             | Add                        | 1.1 (0.72-1.7)             | 1.98 (1.15-3.4)      | 1.41 (0.69-2.91)  | 4.43E-01                         | 6.73E-01         | 1.00E-00   |



**Supplemental Table 1: SNP-Specific Results for Abstinence Rates at End of Treatment**

| SNP        | Gene        | Chr | Position    | MAF <sup>a</sup> | Genetic Model <sup>b</sup> | SNP Odds Ratio (95% CI) | Treatment Odds Ratio |                   | Test of Interaction <sup>c</sup> | LRT <sup>d</sup> |            |
|------------|-------------|-----|-------------|------------------|----------------------------|-------------------------|----------------------|-------------------|----------------------------------|------------------|------------|
|            |             |     |             |                  |                            |                         | WT (95% CI)          | Variant (95% CI)  |                                  | Observed P       | Adjusted P |
| rs6569709  | EPB41L2     | 6   | 131,223,739 | 0.31             | Add                        | 1.08 (0.78-1.48)        | 1.73 (0.94-3.18)     | 1.76 (1.06-2.93)  | 9.51E-01                         | 9.03E-01         | 1.00E-00   |
| rs13710    | FREQ (NCS1) | 9   | 132,037,596 | 0.29             | Add                        | 1.21 (0.85-1.72)        | 2.14 (1.14-4)        | 1.53 (0.9-2.59)   | 3.54E-01                         | 4.03E-01         | 1.00E-00   |
| rs1611118  | DBH         | 9   | 135,494,744 | 0.05             | Add                        | 1.24 (0.61-2.53)        | 1.65 (1.03-2.65)     | 2.93 (0.74-11.51) | 4.36E-01                         | 5.35E-01         | 1.00E-00   |
| rs2871047  | COMT        | 22  | 18,306,331  | 0.06             | Dom                        | 1.26 (0.63-2.53)        | 1.81 (1.12-2.94)     | 1.14 (0.31-4.25)  | 5.18E-01                         | 7.12E-01         | 1.00E-00   |
| rs234630   | GNAS        | 20  | 56,917,050  | 0.30             | Add                        | 1.06 (0.75-1.5)         | 1.58 (0.85-2.92)     | 1.9 (1.11-3.22)   | 6.05E-01                         | 8.23E-01         | 1.00E-00   |
| rs2073835  | DBH         | 9   | 135,522,004 | 0.30             | Add                        | 1.16 (0.82-1.65)        | 1.57 (0.82-3.02)     | 2 (1.18-3.39)     | 5.09E-01                         | 5.61E-01         | 1.00E-00   |
| rs1381376  | OPRM1       | 6   | 154,434,951 | 0.16             | Add                        | 1.08 (0.7-1.66)         | 2 (1.17-3.44)        | 1.38 (0.67-2.84)  | 3.95E-01                         | 6.53E-01         | 1.00E-00   |
| rs9370399  | HCRTR2      | 6   | 55,152,984  | 0.45             | Dom                        | 1.09 (0.67-1.77)        | 1.59 (0.71-3.56)     | 1.82 (1.05-3.14)  | 7.83E-01                         | 9.06E-01         | 1.00E-00   |
| rs2985332  | EPB41       | 1   | 29,211,686  | 0.15             | Dom                        | 0.94 (0.56-1.57)        | 1.69 (1-2.84)        | 1.96 (0.79-4.84)  | 7.82E-01                         | 9.44E-01         | 1.00E-00   |
| rs2076371  | PRKCABP     | 22  | 36,804,642  | 0.29             | Dom                        | 0.93 (0.6-1.45)         | 1.72 (0.91-3.25)     | 1.79 (0.95-3.39)  | 9.29E-01                         | 9.49E-01         | 1.00E-00   |
| rs4485648  | COMT        | 22  | 18,299,405  | 0.18             | Add                        | 0.8 (0.52-1.23)         | 1.76 (1.03-2.99)     | 1.78 (0.85-3.73)  | 9.78E-01                         | 5.67E-01         | 1.00E-00   |
| rs3134696  | HCRTR2      | 6   | 55,170,060  | 0.20             | Add                        | 0.83 (0.56-1.24)        | 1.51 (0.88-2.59)     | 2.23 (1.13-4.39)  | 3.46E-01                         | 4.47E-01         | 1.00E-00   |
| rs2073833  | DBH         | 9   | 135,510,103 | 0.42             | Dom                        | 1.01 (0.62-1.64)        | 2.08 (0.93-4.65)     | 1.68 (0.95-2.97)  | 6.72E-01                         | 9.13E-01         | 1.00E-00   |
| rs5993883  | COMT        | 22  | 18,317,638  | 0.49             | Dom                        | 0.85 (0.51-1.39)        | 1.22 (0.52-2.87)     | 2.01 (1.18-3.41)  | 3.32E-01                         | 5.39E-01         | 1.00E-00   |
| rs2519143  | DBH         | 9   | 135,492,149 | 0.18             | Dom                        | 0.98 (0.61-1.59)        | 1.51 (0.88-2.61)     | 2.39 (1.08-5.31)  | 3.53E-01                         | 6.44E-01         | 1.00E-00   |
| rs10268819 | DDC         | 7   | 50,577,565  | 0.12             | Dom                        | 0.9 (0.52-1.58)         | 2.02 (1.18-3.44)     | 1.34 (0.5-3.62)   | 4.78E-01                         | 7.04E-01         | 1.00E-00   |
| rs709611   | FREQ (NCS1) | 9   | 132,038,180 | 0.28             | Dom                        | 1.14 (0.73-1.79)        | 2.36 (1.23-4.52)     | 1.31 (0.69-2.48)  | 2.05E-01                         | 4.07E-01         | 1.00E-00   |
| rs6026574  | GNAS        | 20  | 56,889,890  | 0.37             | Dom                        | 1.07 (0.68-1.68)        | 1.41 (0.7-2.87)      | 2.02 (1.13-3.64)  | 4.45E-01                         | 7.04E-01         | 1.00E-00   |
| rs3823010  | OPRM1       | 6   | 154,420,845 | 0.16             | Dom                        | 0.88 (0.54-1.42)        | 1.86 (1.08-3.18)     | 1.54 (0.68-3.5)   | 7.07E-01                         | 7.88E-01         | 1.00E-00   |
| rs7773995  | OPRM1       | 6   | 154,424,060 | 0.16             | Dom                        | 0.88 (0.54-1.42)        | 1.86 (1.08-3.18)     | 1.54 (0.68-3.5)   | 7.07E-01                         | 7.88E-01         | 1.00E-00   |
| rs165824   | COMT        | 22  | 18,339,366  | 0.08             | Dom                        | 1.28 (0.68-2.4)         | 1.7 (1.02-2.84)      | 2.09 (0.65-6.69)  | 7.52E-01                         | 6.72E-01         | 1.00E-00   |
| rs947513   | FREQ (NCS1) | 9   | 132,013,809 | 0.45             | Add                        | 0.86 (0.63-1.18)        | 1.41 (0.7-2.84)      | 1.81 (1.14-2.87)  | 4.37E-01                         | 4.91E-01         | 1.00E-00   |
| rs3134689  | HCRTR2      | 6   | 55,162,711  | 0.20             | Add                        | 0.8 (0.54-1.2)          | 1.56 (0.91-2.68)     | 2.09 (1.06-4.14)  | 4.81E-01                         | 4.55E-01         | 1.00E-00   |
| rs165815   | COMT        | 22  | 18,339,473  | 0.15             | Add                        | 1.21 (0.78-1.87)        | 1.92 (1.13-3.27)     | 1.49 (0.71-3.13)  | 5.68E-01                         | 5.92E-01         | 1.00E-00   |
| rs10485058 | OPRM1       | 6   | 154,486,907 | 0.14             | Add                        | 0.94 (0.6-1.48)         | 1.94 (1.16-3.27)     | 1.41 (0.64-3.09)  | 4.84E-01                         | 7.44E-01         | 1.00E-00   |
| rs3777432  | EPB41L2     | 6   | 131,225,509 | 0.16             | Dom                        | 1.09 (0.67-1.78)        | 1.69 (0.99-2.9)      | 1.94 (0.85-4.42)  | 7.87E-01                         | 9.02E-01         | 1.00E-00   |
| rs174696   | COMT        | 22  | 18,333,176  | 0.23             | Dom                        | 1.23 (0.78-1.93)        | 1.99 (1.1-3.61)      | 1.41 (0.71-2.82)  | 4.61E-01                         | 5.50E-01         | 1.00E-00   |
| rs234627   | GNAS        | 20  | 56,920,375  | 0.28             | Add                        | 1.08 (0.76-1.54)        | 1.51 (0.82-2.78)     | 1.95 (1.13-3.36)  | 4.86E-01                         | 7.01E-01         | 1.00E-00   |
| rs356198   | SNCA        | 4   | 90,901,527  | 0.20             | Dom                        | 1.13 (0.71-1.8)         | 1.87 (1.06-3.3)      | 1.56 (0.75-3.25)  | 7.03E-01                         | 8.23E-01         | 1.00E-00   |
| rs2583958  | SNCA        | 4   | 90,939,388  | 0.27             | Dom                        | 0.97 (0.62-1.52)        | 1.73 (0.94-3.2)      | 1.79 (0.93-3.48)  | 9.36E-01                         | 9.89E-01         | 1.00E-00   |
| rs2619373  | SNCA        | 4   | 90,941,456  | 0.27             | Dom                        | 0.97 (0.62-1.52)        | 1.73 (0.94-3.2)      | 1.79 (0.93-3.48)  | 9.36E-01                         | 9.89E-01         | 1.00E-00   |
| rs2519155  | DBH         | 9   | 135,494,419 | 0.38             | Dom                        | 0.9 (0.57-1.42)         | 1.88 (0.92-3.83)     | 1.67 (0.93-2.99)  | 7.98E-01                         | 8.56E-01         | 1.00E-00   |
| rs4075265  | EPB41L2     | 6   | 131,208,150 | 0.31             | Add                        | 1.06 (0.77-1.47)        | 1.78 (0.97-3.27)     | 1.74 (1.04-2.89)  | 9.38E-01                         | 9.33E-01         | 1.00E-00   |
| rs2452788  | EPB41       | 1   | 29,319,398  | 0.15             | Dom                        | 0.97 (0.57-1.65)        | 1.84 (1.07-3.15)     | 1.39 (0.54-3.59)  | 6.19E-01                         | 8.61E-01         | 1.00E-00   |
| rs740603   | COMT        | 22  | 18,325,177  | 0.49             | Dom                        | 0.86 (0.52-1.41)        | 1.17 (0.5-2.71)      | 2.04 (1.2-3.48)   | 2.71E-01                         | 4.92E-01         | 1.00E-00   |
| rs174699   | COMT        | 22  | 18,334,458  | 0.05             | Dom                        | 0.83 (0.37-1.89)        | 1.65 (1.03-2.63)     | 3.37 (0.68-16.63) | 3.99E-01                         | 6.36E-01         | 1.00E-00   |
| rs2653348  | HCRTR2      | 6   | 55,247,827  | 0.41             | Add                        | 0.97 (0.71-1.34)        | 1.54 (0.77-3.1)      | 1.8 (1.13-2.86)   | 6.38E-01                         | 8.87E-01         | 1.00E-00   |
| rs203298   | EPB41       | 1   | 29,105,251  | 0.09             | Dom                        | 0.91 (0.49-1.7)         | 1.86 (1.14-3.04)     | 1.16 (0.37-3.66)  | 4.57E-01                         | 7.13E-01         | 1.00E-00   |
| rs7741664  | HCRTR2      | 6   | 55,213,260  | 0.25             | Add                        | 0.82 (0.56-1.2)         | 1.52 (0.85-2.7)      | 2.07 (1.12-3.84)  | 4.33E-01                         | 4.70E-01         | 1.00E-00   |

**Supplemental Table 1: SNP-Specific Results for Abstinence Rates at End of Treatment**

| SNP        | Gene        | Chr | Position    | MAF <sup>a</sup> | Genetic Model <sup>b</sup> | SNP Odds Ratio<br>(95% CI) | Treatment Odds Ratio |                  | Test of Interaction <sup>c</sup> | LRT <sup>d</sup> |            |
|------------|-------------|-----|-------------|------------------|----------------------------|----------------------------|----------------------|------------------|----------------------------------|------------------|------------|
|            |             |     |             |                  |                            |                            | WT (95% CI)          | Variant (95% CI) |                                  | Observed P       | Adjusted P |
| rs4646316  | COMT        | 22  | 18,332,132  | 0.21             | Add                        | 1.23 (0.83-1.82)           | 1.9 (1.07-3.37)      | 1.51 (0.81-2.82) | 5.66E-01                         | 5.23E-01         | 1.00E-00   |
| rs2239393  | COMT        | 22  | 18,330,428  | 0.38             | Add                        | 1.02 (0.75-1.39)           | 1.4 (0.73-2.71)      | 1.88 (1.17-3.03) | 3.56E-01                         | 6.34E-01         | 1.00E-00   |
| rs9349768  | HCRTR2      | 6   | 55,199,409  | 0.22             | Add                        | 0.79 (0.53-1.17)           | 1.76 (1.01-3.05)     | 1.75 (0.9-3.39)  | 9.93E-01                         | 4.84E-01         | 1.00E-00   |
| rs9357850  | HCRTR2      | 6   | 55,204,783  | 0.22             | Add                        | 0.79 (0.53-1.17)           | 1.76 (1.01-3.05)     | 1.75 (0.9-3.39)  | 9.93E-01                         | 4.84E-01         | 1.00E-00   |
| rs3798683  | OPRM1       | 6   | 154,460,107 | 0.16             | Add                        | 1.14 (0.75-1.74)           | 1.82 (1.06-3.11)     | 1.68 (0.82-3.47) | 8.64E-01                         | 8.25E-01         | 1.00E-00   |
| rs4812042  | GNAS        | 20  | 56,895,310  | 0.41             | Dom                        | 1.24 (0.78-2)              | 1.91 (0.88-4.15)     | 1.67 (0.96-2.89) | 7.82E-01                         | 6.48E-01         | 1.00E-00   |
| rs2180696  | GNAS        | 20  | 56,887,299  | 0.40             | Dom                        | 0.87 (0.63-1.2)            | 1.59 (0.76-3.32)     | 1.84 (1.04-3.26) | 7.41E-01                         | 6.79E-01         | 1.00E-00   |
| rs3778151  | OPRM1       | 6   | 154,435,373 | 0.16             | Dom                        | 0.95 (0.59-1.54)           | 1.91 (1.11-3.3)      | 1.45 (0.65-3.25) | 5.78E-01                         | 8.31E-01         | 1.00E-00   |
| rs7775013  | EPB41L2     | 6   | 131,228,271 | 0.37             | Add                        | 0.91 (0.66-1.26)           | 1.55 (0.81-2.95)     | 1.84 (1.13-3)    | 5.99E-01                         | 7.61E-01         | 1.00E-00   |
| rs150093   | EPB41       | 1   | 29,101,418  | 0.13             | Add                        | 1.13 (0.71-1.78)           | 1.69 (1.01-2.85)     | 1.94 (0.87-4.31) | 7.75E-01                         | 8.24E-01         | 1.00E-00   |
| rs2985322  | EPB41       | 1   | 29,169,054  | 0.32             | Add                        | 1.05 (0.75-1.47)           | 1.85 (0.99-3.46)     | 1.69 (1.01-2.83) | 7.98E-01                         | 9.36E-01         | 1.00E-00   |
| rs9908820  | GRB2        | 17  | 70,920,414  | 0.34             | Dom                        | 0.96 (0.62-1.5)            | 1.54 (0.79-3)        | 1.96 (1.06-3.62) | 6.08E-01                         | 8.72E-01         | 1.00E-00   |
| rs7452651  | HCRTR2      | 6   | 55,243,472  | 0.22             | Dom                        | 0.79 (0.53-1.18)           | 1.84 (1.05-3.24)     | 1.61 (0.76-3.4)  | 9.09E-01                         | 4.95E-01         | 1.00E-00   |
| rs2134294  | HCRTR2      | 6   | 55,242,206  | 0.44             | Dom                        | 0.92 (0.57-1.49)           | 1.25 (0.57-2.74)     | 2.05 (1.18-3.56) | 3.13E-01                         | 5.88E-01         | 1.00E-00   |
| rs2653350  | HCRTR2      | 6   | 55,252,061  | 0.43             | Dom                        | 0.94 (0.59-1.51)           | 1.34 (0.62-2.9)      | 2.01 (1.16-3.5)  | 4.01E-01                         | 6.95E-01         | 1.00E-00   |
| rs6938735  | EPB41L2     | 6   | 131,196,596 | 0.31             | Add                        | 1.08 (0.78-1.5)            | 1.75 (0.95-3.23)     | 1.75 (1.05-2.9)  | 9.93E-01                         | 8.89E-01         | 1.00E-00   |
| rs7868148  | FREQ (NCS1) | 9   | 132,043,755 | 0.27             | Add                        | 1.11 (0.78-1.57)           | 1.46 (0.8-2.66)      | 2.08 (1.21-3.58) | 3.23E-01                         | 5.02E-01         | 1.00E-00   |
| rs4142972  | HCRTR2      | 6   | 55,184,896  | 0.18             | Dom                        | 1.13 (0.71-1.81)           | 1.93 (1.11-3.36)     | 1.48 (0.69-3.19) | 5.86E-01                         | 7.76E-01         | 1.00E-00   |
| rs1541333  | DBH         | 9   | 135,501,206 | 0.44             | Dom                        | 0.89 (0.65-1.22)           | 1.65 (0.76-3.57)     | 1.82 (1.04-3.16) | 3.96E-01                         | 5.64E-01         | 1.00E-00   |
| rs2519154  | DBH         | 9   | 135,502,096 | 0.42             | Add                        | 0.97 (0.71-1.34)           | 1.4 (0.7-2.8)        | 1.83 (1.15-2.91) | 4.08E-01                         | 7.03E-01         | 1.00E-00   |
| rs3113355  | SNCA        | 4   | 90,964,368  | 0.23             | Add                        | 0.95 (0.65-1.37)           | 1.91 (1.08-3.37)     | 1.6 (0.88-2.93)  | 6.53E-01                         | 8.30E-01         | 1.00E-00   |
| rs4897473  | EPB41L2     | 6   | 131,256,964 | 0.35             | Add                        | 0.89 (0.64-1.24)           | 1.48 (0.79-2.79)     | 1.89 (1.15-3.13) | 4.67E-01                         | 6.31E-01         | 1.00E-00   |
| rs7856531  | FREQ (NCS1) | 9   | 132,000,447 | 0.46             | Dom                        | 0.83 (0.51-1.34)           | 2.2 (0.98-4.92)      | 1.59 (0.93-2.74) | 5.16E-01                         | 5.59E-01         | 1.00E-00   |
| rs1108580  | DBH         | 9   | 135,494,935 | 0.45             | Add                        | 1.03 (0.74-1.43)           | 1.28 (0.61-2.7)      | 1.85 (1.14-3)    | 2.72E-01                         | 5.23E-01         | 1.00E-00   |
| rs988749   | EPB41L2     | 6   | 131,201,181 | 0.29             | Add                        | 1.07 (0.77-1.49)           | 1.65 (0.9-3)         | 1.82 (1.07-3.08) | 7.69E-01                         | 8.85E-01         | 1.00E-00   |
| rs10819615 | FREQ (NCS1) | 9   | 132,014,745 | 0.36             | Dom                        | 1.17 (0.74-1.86)           | 2.29 (1.12-4.68)     | 1.41 (0.78-2.52) | 2.99E-01                         | 4.84E-01         | 1.00E-00   |
| rs4074181  | HCRTR2      | 6   | 55,211,426  | 0.22             | Dom                        | 0.8 (0.54-1.19)            | 1.82 (1.04-3.21)     | 1.64 (0.78-3.45) | 9.29E-01                         | 5.24E-01         | 1.00E-00   |
| rs2797849  | DBH         | 9   | 135,491,762 | 0.38             | Add                        | 1.06 (0.76-1.48)           | 1.54 (0.79-3.02)     | 1.84 (1.14-2.97) | 6.03E-01                         | 8.04E-01         | 1.00E-00   |
| rs7121     | GNAS        | 20  | 56,912,202  | 0.50             | Dom                        | 1.05 (0.61-1.81)           | 2.65 (1.01-6.92)     | 1.55 (0.93-2.59) | 3.39E-01                         | 6.24E-01         | 1.00E-00   |
| rs10819621 | FREQ (NCS1) | 9   | 132,045,353 | 0.14             | Add                        | 0.93 (0.57-1.51)           | 1.56 (0.93-2.61)     | 2.53 (1.06-6.01) | 3.39E-01                         | 6.25E-01         | 1.00E-00   |
| rs3122156  | HCRTR2      | 6   | 55,190,766  | 0.26             | Dom                        | 0.85 (0.59-1.24)           | 1.6 (0.88-2.92)      | 1.99 (1.01-3.92) | 8.12E-01                         | 6.96E-01         | 1.00E-00   |
| rs9475195  | HCRTR2      | 6   | 55,168,977  | 0.39             | Dom                        | 0.83 (0.53-1.31)           | 1.88 (0.91-3.87)     | 1.69 (0.95-3.01) | 8.27E-01                         | 6.98E-01         | 1.00E-00   |
| rs2788888  | EPB41       | 1   | 29,252,579  | 0.23             | Dom                        | 0.92 (0.63-1.33)           | 1.87 (1.05-3.31)     | 1.62 (0.78-3.36) | 6.78E-01                         | 7.88E-01         | 1.00E-00   |
| rs2153165  | EPB41       | 1   | 29,258,073  | 0.23             | Dom                        | 0.92 (0.63-1.33)           | 1.87 (1.05-3.31)     | 1.62 (0.78-3.36) | 6.78E-01                         | 7.88E-01         | 1.00E-00   |
| rs12662510 | HCRTR2      | 6   | 55,187,850  | 0.15             | Add                        | 0.8 (0.5-1.27)             | 1.72 (1.02-2.87)     | 1.8 (0.79-4.08)  | 9.24E-01                         | 6.35E-01         | 1.00E-00   |
| rs2486200  | EPB41       | 1   | 29,236,572  | 0.23             | Dom                        | 0.91 (0.63-1.32)           | 1.86 (1.05-3.29)     | 1.62 (0.78-3.36) | 6.88E-01                         | 7.88E-01         | 1.00E-00   |
| rs9464203  | HCRTR2      | 6   | 55,145,083  | 0.21             | Add                        | 1.24 (0.85-1.79)           | 1.74 (0.98-3.06)     | 1.76 (0.96-3.23) | 9.68E-01                         | 5.38E-01         | 1.00E-00   |
| rs7852859  | FREQ (NCS1) | 9   | 132,034,981 | 0.12             | Add                        | 0.93 (0.58-1.51)           | 1.7 (1.02-2.83)      | 1.92 (0.82-4.5)  | 8.04E-01                         | 9.35E-01         | 1.00E-00   |
| rs3134710  | HCRTR2      | 6   | 55,190,420  | 0.26             | Dom                        | 0.89 (0.57-1.39)           | 1.6 (0.88-2.92)      | 1.99 (1.01-3.92) | 6.39E-01                         | 8.00E-01         | 1.00E-00   |

**Supplemental Table 1: SNP-Specific Results for Abstinence Rates at End of Treatment**

| SNP        | Gene        | Chr | Position    | MAF <sup>a</sup> | Genetic Model <sup>b</sup> | SNP Odds Ratio<br>(95% CI) | Treatment Odds Ratio |                  | Test of Interaction <sup>c</sup> | LRT <sup>d</sup> |            |
|------------|-------------|-----|-------------|------------------|----------------------------|----------------------------|----------------------|------------------|----------------------------------|------------------|------------|
|            |             |     |             |                  |                            |                            | WT (95% CI)          | Variant (95% CI) |                                  | Observed P       | Adjusted P |
| rs1054879  | FREQ (NCS1) | 9   | 132,035,589 | 0.46             | Add                        | 0.86 (0.63-1.19)           | 1.65 (0.79-3.45)     | 1.73 (1.1-2.73)  | 8.79E-01                         | 6.60E-01         | 1.00E-00   |
| rs3824544  | FREQ (NCS1) | 9   | 131,988,371 | 0.25             | Add                        | 1.06 (0.75-1.48)           | 2.08 (1.18-3.69)     | 1.55 (0.88-2.72) | 3.98E-01                         | 6.85E-01         | 1.00E-00   |
| rs2653342  | HCRTR2      | 6   | 55,239,096  | 0.15             | Add                        | 1.25 (0.81-1.91)           | 1.79 (1.05-3.07)     | 1.75 (0.86-3.59) | 9.59E-01                         | 5.98E-01         | 1.00E-00   |
| rs2797853  | DBH         | 9   | 135,502,336 | 0.36             | Dom                        | 1.06 (0.67-1.68)           | 2.23 (1.07-4.64)     | 1.52 (0.86-2.68) | 4.19E-01                         | 7.12E-01         | 1.00E-00   |
| rs2619372  | SNCA        | 4   | 90,955,750  | 0.29             | Dom                        | 0.98 (0.69-1.38)           | 1.68 (0.88-3.2)      | 1.84 (0.98-3.48) | 7.17E-01                         | 9.14E-01         | 1.00E-00   |
| rs2737020  | SNCA        | 4   | 90,959,901  | 0.29             | Dom                        | 0.98 (0.69-1.38)           | 1.68 (0.88-3.2)      | 1.84 (0.98-3.48) | 7.17E-01                         | 9.14E-01         | 1.00E-00   |
| rs4236127  | HCRTR2      | 6   | 55,164,136  | 0.18             | Dom                        | 0.86 (0.57-1.31)           | 1.57 (0.91-2.69)     | 2.23 (0.99-5)    | 4.09E-01                         | 5.74E-01         | 1.00E-00   |
| rs1541332  | DBH         | 9   | 135,501,337 | 0.45             | Dom                        | 1.14 (0.69-1.88)           | 2.42 (1.03-5.67)     | 1.54 (0.91-2.61) | 3.79E-01                         | 6.13E-01         | 1.00E-00   |
| rs204057   | EPB41       | 1   | 29,144,644  | 0.24             | Dom                        | 1.15 (0.73-1.82)           | 1.57 (0.87-2.83)     | 1.96 (0.97-3.97) | 6.31E-01                         | 7.04E-01         | 1.00E-00   |
| rs3122154  | HCRTR2      | 6   | 55,186,417  | 0.21             | Add                        | 1.22 (0.83-1.77)           | 1.86 (1.06-3.28)     | 1.62 (0.88-2.98) | 7.15E-01                         | 5.79E-01         | 1.00E-00   |
| rs3122169  | HCRTR2      | 6   | 55,221,370  | 0.18             | Add                        | 1.19 (0.8-1.78)            | 1.95 (1.12-3.41)     | 1.55 (0.81-2.97) | 5.73E-01                         | 5.70E-01         | 1.00E-00   |
| rs6927478  | HCRTR2      | 6   | 55,152,345  | 0.39             | Dom                        | 1.22 (0.76-1.95)           | 2.22 (1.04-4.77)     | 1.55 (0.89-2.72) | 4.54E-01                         | 5.76E-01         | 1.00E-00   |
| rs7045735  | FREQ (NCS1) | 9   | 132,004,454 | 0.40             | Dom                        | 0.9 (0.55-1.46)            | 2.33 (1.05-5.16)     | 1.61 (0.9-2.88)  | 4.60E-01                         | 6.47E-01         | 1.00E-00   |
| rs7849345  | FREQ (NCS1) | 9   | 131,984,366 | 0.49             | Dom                        | 1.19 (0.71-2)              | 1.65 (0.67-4.1)      | 1.81 (1.08-3.04) | 8.66E-01                         | 7.80E-01         | 1.00E-00   |
| rs2583975  | SNCA        | 4   | 90,967,511  | 0.23             | Add                        | 0.97 (0.67-1.41)           | 1.95 (1.11-3.45)     | 1.55 (0.84-2.86) | 5.51E-01                         | 7.91E-01         | 1.00E-00   |
| rs10498801 | HCRTR2      | 6   | 55,174,923  | 0.18             | Dom                        | 0.86 (0.57-1.31)           | 1.57 (0.92-2.71)     | 2.23 (0.99-5)    | 4.14E-01                         | 5.81E-01         | 1.00E-00   |
| rs168552   | SNCA        | 4   | 90,862,167  | 0.29             | Add                        | 0.95 (0.65-1.37)           | 1.66 (0.9-3.06)      | 1.87 (1.06-3.27) | 7.57E-01                         | 9.25E-01         | 1.00E-00   |
| rs4897472  | EPB41L2     | 6   | 131,254,831 | 0.48             | Dom                        | 1.13 (0.69-1.85)           | 1.99 (0.85-4.64)     | 1.66 (0.98-2.82) | 7.26E-01                         | 8.50E-01         | 1.00E-00   |
| rs2068147  | EPB41L2     | 6   | 131,263,595 | 0.48             | Dom                        | 1.13 (0.69-1.85)           | 1.99 (0.85-4.64)     | 1.66 (0.98-2.82) | 7.26E-01                         | 8.50E-01         | 1.00E-00   |
| rs484000   | EPB41       | 1   | 29,324,724  | 0.07             | Dom                        | 1.09 (0.56-2.14)           | 1.87 (1.12-3.11)     | 1.21 (0.34-4.22) | 5.28E-01                         | 8.06E-01         | 1.00E-00   |
| rs3798249  | EPB41L2     | 6   | 131,249,136 | 0.48             | Dom                        | 1.11 (0.68-1.83)           | 1.94 (0.83-4.53)     | 1.66 (0.98-2.82) | 7.65E-01                         | 8.83E-01         | 1.00E-00   |
| rs157198   | EPB41       | 1   | 29,076,494  | 0.08             | Dom                        | 0.76 (0.39-1.47)           | 1.8 (1.11-2.93)      | 1.81 (0.53-6.24) | 9.92E-01                         | 7.08E-01         | 1.00E-00   |
| rs1611115  | DBH         | 9   | 135,490,336 | 0.19             | Add                        | 1.09 (0.72-1.66)           | 1.6 (0.92-2.79)      | 1.98 (1-3.92)    | 6.15E-01                         | 8.04E-01         | 1.00E-00   |
| rs157208   | EPB41       | 1   | 29,117,993  | 0.24             | Dom                        | 1.11 (0.71-1.75)           | 1.59 (0.88-2.88)     | 1.96 (0.97-3.96) | 6.56E-01                         | 7.91E-01         | 1.00E-00   |
| rs6919007  | EPB41L2     | 6   | 131,206,179 | 0.37             | Add                        | 0.91 (0.66-1.25)           | 1.51 (0.8-2.86)      | 1.87 (1.14-3.05) | 5.25E-01                         | 7.12E-01         | 1.00E-00   |
| rs9402292  | EPB41L2     | 6   | 131,211,966 | 0.37             | Add                        | 0.91 (0.66-1.25)           | 1.51 (0.8-2.86)      | 1.87 (1.14-3.05) | 5.25E-01                         | 7.12E-01         | 1.00E-00   |
| rs9367622  | HCRTR2      | 6   | 55,177,132  | 0.15             | Dom                        | 0.84 (0.5-1.4)             | 1.73 (1.03-2.92)     | 1.79 (0.73-4.38) | 9.49E-01                         | 7.95E-01         | 1.00E-00   |
| rs4712099  | HCRTR2      | 6   | 55,163,157  | 0.17             | Dom                        | 1.15 (0.72-1.85)           | 1.97 (1.13-3.42)     | 1.35 (0.62-2.95) | 4.44E-01                         | 6.52E-01         | 1.00E-00   |
| rs1076150  | DBH         | 9   | 135,488,582 | 0.47             | Add                        | 1.05 (0.76-1.43)           | 1.35 (0.64-2.84)     | 1.85 (1.16-2.96) | 3.23E-01                         | 5.67E-01         | 1.00E-00   |
| rs4897468  | EPB41L2     | 6   | 131,206,765 | 0.37             | Add                        | 0.91 (0.66-1.25)           | 1.5 (0.79-2.84)      | 1.87 (1.15-3.05) | 5.05E-01                         | 6.89E-01         | 1.00E-00   |
| rs9382467  | HCRTR2      | 6   | 55,198,914  | 0.46             | Dom                        | 0.88 (0.54-1.43)           | 1.24 (0.56-2.76)     | 2.04 (1.18-3.51) | 3.14E-01                         | 5.63E-01         | 1.00E-00   |
| rs2105250  | EPB41L2     | 6   | 131,325,875 | 0.27             | Add                        | 1.04 (0.74-1.46)           | 1.57 (0.87-2.82)     | 2.01 (1.16-3.48) | 4.78E-01                         | 7.56E-01         | 1.00E-00   |
| rs10011157 | SNCA        | 4   | 90,969,867  | 0.23             | Dom                        | 0.98 (0.62-1.54)           | 1.7 (0.95-3.06)      | 2.07 (1.01-4.27) | 6.77E-01                         | 9.16E-01         | 1.00E-00   |
| rs1999474  | EPB41L2     | 6   | 131,279,395 | 0.28             | Add                        | 1.07 (0.76-1.5)            | 1.51 (0.84-2.72)     | 1.96 (1.14-3.37) | 4.54E-01                         | 6.95E-01         | 1.00E-00   |
| rs2737033  | SNCA        | 4   | 90,926,970  | 0.27             | Add                        | 1.01 (0.69-1.47)           | 1.83 (1-3.34)        | 1.69 (0.95-3.01) | 8.41E-01                         | 9.80E-01         | 1.00E-00   |
| rs2985335  | EPB41       | 1   | 29,218,234  | 0.13             | Dom                        | 0.9 (0.53-1.55)            | 1.69 (1.01-2.81)     | 2.06 (0.78-5.39) | 7.23E-01                         | 8.94E-01         | 1.00E-00   |
| rs7766004  | EPB41L2     | 6   | 131,295,666 | 0.27             | Dom                        | 1.1 (0.7-1.72)             | 1.64 (0.89-3.03)     | 1.87 (0.95-3.65) | 7.80E-01                         | 8.67E-01         | 1.00E-00   |
| rs7863731  | FREQ (NCS1) | 9   | 132,042,626 | 0.39             | Dom                        | 0.85 (0.53-1.35)           | 1.59 (0.76-3.32)     | 1.74 (0.98-3.09) | 8.47E-01                         | 7.78E-01         | 1.00E-00   |
| rs3775443  | SNCA        | 4   | 90,934,697  | 0.06             | Add                        | 1.09 (0.55-2.16)           | 1.75 (1.08-2.84)     | 1.91 (0.54-6.72) | 9.01E-01                         | 9.63E-01         | 1.00E-00   |

**Supplemental Table 1: SNP-Specific Results for Abstinence Rates at End of Treatment**

| SNP        | Gene        | Chr | Position    | MAF <sup>a</sup> | Genetic Model <sup>b</sup> | SNP Odds Ratio<br>(95% CI) | Treatment Odds Ratio |                  | Test of Interaction <sup>c</sup> | LRT <sup>d</sup> |            |
|------------|-------------|-----|-------------|------------------|----------------------------|----------------------------|----------------------|------------------|----------------------------------|------------------|------------|
|            |             |     |             |                  |                            |                            | WT (95% CI)          | Variant (95% CI) |                                  | Observed P       | Adjusted P |
| rs17016190 | SNCA        | 4   | 90,941,855  | 0.06             | Add                        | 1.09 (0.55-2.16)           | 1.75 (1.08-2.84)     | 1.91 (0.54-6.72) | 9.01E-01                         | 9.63E-01         | 1.00E-00   |
| rs9357845  | HCRTR2      | 6   | 55,142,145  | 0.39             | Dom                        | 0.86 (0.55-1.36)           | 1.58 (0.77-3.24)     | 1.88 (1.06-3.34) | 7.09E-01                         | 7.86E-01         | 1.00E-00   |
| rs1413753  | EPB41L2     | 6   | 131,192,197 | 0.32             | Dom                        | 1.14 (0.73-1.8)            | 1.71 (0.88-3.33)     | 1.83 (0.98-3.42) | 8.84E-01                         | 8.25E-01         | 1.00E-00   |
| rs2985329  | EPB41       | 1   | 29,206,549  | 0.13             | Add                        | 0.89 (0.56-1.42)           | 1.72 (1.04-2.85)     | 1.89 (0.81-4.39) | 8.46E-01                         | 8.88E-01         | 1.00E-00   |
| rs9426306  | EPB41       | 1   | 29,261,001  | 0.13             | Add                        | 0.89 (0.56-1.42)           | 1.72 (1.04-2.85)     | 1.89 (0.81-4.39) | 8.46E-01                         | 8.88E-01         | 1.00E-00   |
| rs6935267  | EPB41L2     | 6   | 131,204,791 | 0.16             | Dom                        | 0.87 (0.52-1.44)           | 1.71 (1.01-2.88)     | 1.94 (0.81-4.66) | 8.05E-01                         | 8.46E-01         | 1.00E-00   |
| rs12072697 | EPB41       | 1   | 29,209,878  | 0.09             | Dom                        | 0.97 (0.52-1.78)           | 1.83 (1.12-2.99)     | 1.3 (0.42-4.03)  | 5.86E-01                         | 8.50E-01         | 1.00E-00   |
| rs7768760  | HCRTR2      | 6   | 55,153,334  | 0.49             | Dom                        | 1.06 (0.77-1.46)           | 1.33 (0.55-3.23)     | 1.94 (1.14-3.31) | 3.64E-01                         | 6.25E-01         | 1.00E-00   |
| rs2254241  | EPB41       | 1   | 29,290,620  | 0.13             | Dom                        | 0.9 (0.52-1.55)            | 1.68 (1.01-2.8)      | 2.05 (0.77-5.43) | 7.26E-01                         | 8.88E-01         | 1.00E-00   |
| rs2277200  | FREQ (NCS1) | 9   | 132,028,530 | 0.31             | Add                        | 0.92 (0.66-1.29)           | 1.85 (1-3.44)        | 1.68 (1.01-2.82) | 7.80E-01                         | 8.53E-01         | 1.00E-00   |
| rs7024495  | FREQ (NCS1) | 9   | 132,007,017 | 0.48             | Dom                        | 0.97 (0.59-1.59)           | 2.04 (0.87-4.8)      | 1.65 (0.97-2.8)  | 6.79E-01                         | 9.01E-01         | 1.00E-00   |
| rs2900286  | FREQ (NCS1) | 9   | 132,030,234 | 0.31             | Add                        | 0.94 (0.67-1.31)           | 1.85 (1-3.43)        | 1.69 (1.01-2.83) | 7.88E-01                         | 8.94E-01         | 1.00E-00   |
| rs575710   | EPB41       | 1   | 29,319,242  | 0.09             | Dom                        | 0.87 (0.49-1.55)           | 1.84 (1.13-3.01)     | 1.38 (0.45-4.25) | 6.57E-01                         | 7.96E-01         | 1.00E-00   |
| rs203278   | EPB41       | 1   | 29,114,784  | 0.36             | Dom                        | 1.07 (0.68-1.69)           | 1.96 (0.97-3.97)     | 1.61 (0.9-2.9)   | 6.82E-01                         | 8.85E-01         | 1.00E-00   |
| rs10988653 | FREQ (NCS1) | 9   | 132,046,295 | 0.38             | Dom                        | 1.08 (0.78-1.5)            | 1.72 (0.83-3.55)     | 1.72 (0.97-3.07) | 5.26E-01                         | 7.48E-01         | 1.00E-00   |
| rs10988645 | FREQ (NCS1) | 9   | 132,019,357 | 0.29             | Dom                        | 1.03 (0.66-1.61)           | 1.83 (0.97-3.46)     | 1.69 (0.9-3.19)  | 8.62E-01                         | 9.79E-01         | 1.00E-00   |
| rs7023210  | FREQ (NCS1) | 9   | 132,011,977 | 0.48             | Dom                        | 0.92 (0.56-1.5)            | 2 (0.86-4.62)        | 1.66 (0.98-2.83) | 7.17E-01                         | 8.70E-01         | 1.00E-00   |
| rs3897499  | FREQ (NCS1) | 9   | 132,014,885 | 0.36             | Dom                        | 1 (0.64-1.57)              | 1.87 (0.94-3.71)     | 1.63 (0.89-2.96) | 7.63E-01                         | 9.55E-01         | 1.00E-00   |
| rs7873936  | FREQ (NCS1) | 9   | 132,032,983 | 0.18             | Dom                        | 0.93 (0.58-1.5)            | 1.84 (1.07-3.18)     | 1.62 (0.73-3.57) | 7.89E-01                         | 9.13E-01         | 1.00E-00   |

<sup>a</sup> The minor allele frequency was calculated using subjects in our study sample. <sup>b</sup> For each SNP, dominant and additive genetic models were fitted and the model yielding the lower adjusted p-value was selected. <sup>c</sup> The Test of Interaction is the observed p-value from a test of heterogeneity for the treatment odds ratios. <sup>d</sup> The Likelihood Ratio Test Observed P-value was obtained using a joint 2-df test combining the genetic marginal effect and the gene-treatment interaction effect. Adjusted P-values were estimated by accounting for the correlation between observed SNPs within respective gene regions. This adjustment was also used when selecting a genetic model.

**Supplemental Table 2: SNP-Specific Results for Abstinence Rates at 6-Month Follow-up**

| SNP        | Gene    | Chr | Position    | MAF <sup>a</sup> | Genetic Model <sup>b</sup> | SNP Odds Ratio<br>(95% CI) | Treatment Odds Ratio |                   | Test of Interaction <sup>c</sup> | LRT <sup>d</sup> |                       |
|------------|---------|-----|-------------|------------------|----------------------------|----------------------------|----------------------|-------------------|----------------------------------|------------------|-----------------------|
|            |         |     |             |                  |                            |                            | WT (95% CI)          | Variant (95% CI)  |                                  | Observed P       | Adjusted P            |
| rs2072661  | CHRNA2  | 1   | 152,815,504 | 0.23             | Dom                        | 0.31 (0.18-0.55)           | 2.14 (1.2-3.81)      | 0.83 (0.32-2.19)  | 1.01E-01                         | 1.54E-05         | 2.40E-04 <sup>e</sup> |
| rs2072660  | CHRNA2  | 1   | 152,815,345 | 0.23             | Dom                        | 0.33 (0.19-0.58)           | 2.04 (1.15-3.63)     | 0.86 (0.33-2.26)  | 1.32E-01                         | 4.33E-05         | 6.36E-04 <sup>e</sup> |
| rs2069454  | CDK5    | 7   | 150,383,915 | 0.14             | Dom                        | 2.07 (1.18-3.62)           | 1.12 (0.61-2.05)     | 5.03 (1.93-13.1)  | 9.38E-03                         | 3.71E-04         | 4.73E-03              |
| rs1127314  | CHRNA2  | 1   | 152,822,890 | 0.30             | Add                        | 0.52 (0.35-0.78)           | 1.71 (0.92-3.15)     | 1.53 (0.79-2.96)  | 7.95E-01                         | 3.67E-03         | 2.77E-02              |
| rs2238687  | FOSB    | 19  | 50,665,006  | 0.13             | Add                        | 2.22 (1.4-3.52)            | 1.74 (0.97-3.15)     | 1.59 (0.74-3.43)  | 8.48E-01                         | 3.68E-03         | 3.05E-02              |
| rs10517626 | TDO2    | 4   | 157,050,894 | 0.10             | Add                        | 1.96 (1.17-3.28)           | 1.31 (0.76-2.28)     | 3.46 (1.37-8.76)  | 6.98E-02                         | 3.23E-03         | 3.34E-02              |
| rs2131902  | CHRNA2  | 1   | 152,826,222 | 0.31             | Dom                        | 0.47 (0.29-0.76)           | 1.78 (0.94-3.37)     | 1.43 (0.67-3.04)  | 6.62E-01                         | 6.42E-03         | 4.47E-02              |
| rs3766927  | CHRNA2  | 1   | 152,830,765 | 0.30             | Dom                        | 0.47 (0.29-0.78)           | 1.83 (0.97-3.46)     | 1.35 (0.63-2.9)   | 5.47E-01                         | 6.79E-03         | 4.53E-02              |
| rs13152449 | TDO2    | 4   | 157,055,252 | 0.10             | Add                        | 1.94 (1.15-3.25)           | 1.34 (0.77-2.31)     | 3.45 (1.35-8.82)  | 7.74E-02                         | 4.61E-03         | 4.55E-02              |
| rs1877032  | PPP1R1B | 17  | 35,024,590  | 0.08             | Dom                        | 0.34 (0.14-0.84)           | 1.91 (1.12-3.27)     | 0.83 (0.15-4.55)  | 3.61E-01                         | 1.57E-02         | 7.58E-02              |
| rs934778   | POMC    | 2   | 25,242,728  | 0.33             | Dom                        | 1.88 (1.14-3.09)           | 1.03 (0.47-2.27)     | 2.24 (1.2-4.18)   | 1.29E-01                         | 8.01E-03         | 8.58E-02              |
| rs11101694 | CALCYON | 10  | 134,996,704 | 0.14             | Dom                        | 0.56 (0.28-1.13)           | 1.26 (0.72-2.2)      | 6.28 (1.68-23.4)  | 2.75E-02                         | 2.93E-02         | 9.43E-02              |
| rs11700361 | EPB41L1 | 20  | 34,285,729  | 0.17             | Dom                        | 1.05 (0.62-1.77)           | 2.77 (1.5-5.15)      | 0.62 (0.27-1.44)  | 5.19E-03                         | 1.86E-02         | 1.02E-01              |
| rs6142512  | EPB41L1 | 20  | 34,178,851  | 0.17             | Dom                        | 0.88 (0.52-1.48)           | 2.68 (1.46-4.93)     | 0.62 (0.26-1.46)  | 6.59E-03                         | 1.85E-02         | 1.07E-01              |
| rs6142508  | EPB41L1 | 20  | 34,160,719  | 0.17             | Dom                        | 0.88 (0.52-1.48)           | 2.68 (1.46-4.94)     | 0.62 (0.26-1.45)  | 6.43E-03                         | 1.82E-02         | 1.08E-01              |
| rs3810417  | KLF16   | 19  | 1,815,601   | 0.17             | Dom                        | 0.46 (0.26-0.84)           | 1.55 (0.9-2.7)       | 2.53 (0.86-7.46)  | 4.30E-01                         | 2.85E-02         | 1.20E-01              |
| rs2298122  | CALCYON | 10  | 134,991,562 | 0.19             | Add                        | 0.67 (0.39-1.13)           | 1.19 (0.66-2.14)     | 3.96 (1.54-10.21) | 3.02E-02                         | 3.98E-02         | 1.33E-01              |
| rs2878125  | TDO2    | 4   | 157,053,811 | 0.12             | Add                        | 1.75 (1.09-2.81)           | 1.42 (0.81-2.49)     | 2.47 (1.06-5.72)  | 2.62E-01                         | 2.19E-02         | 1.72E-01              |
| rs6141600  | EPB41L1 | 20  | 34,175,724  | 0.28             | Dom                        | 0.77 (0.47-1.26)           | 2.26 (1.15-4.44)     | 1.03 (0.5-2.13)   | 1.20E-01                         | 1.41E-01         | 1.86E-01              |
| rs12961210 | ADCYAP1 | 18  | 890,523     | 0.32             | Add                        | 1.59 (1.12-2.26)           | 2.76 (1.29-5.87)     | 1.56 (0.93-2.63)  | 1.16E-01                         | 1.10E-02         | 1.90E-01              |
| rs709050   | EPB41L1 | 20  | 34,292,023  | 0.20             | Dom                        | 0.81 (0.49-1.35)           | 2.52 (1.36-4.67)     | 0.75 (0.33-1.71)  | 2.13E-02                         | 4.14E-02         | 1.98E-01              |
| rs3811450  | CHRNA2  | 1   | 152,817,656 | 0.08             | Dom                        | 0.37 (0.15-0.9)            | 1.69 (1.02-2.81)     | 1.91 (0.34-10.79) | 8.96E-01                         | 4.25E-02         | 2.16E-01              |
| rs9892427  | PPP1R1B | 17  | 35,058,384  | 0.08             | Dom                        | 0.41 (0.18-0.94)           | 1.7 (1.02-2.83)      | 1.31 (0.27-6.43)  | 7.58E-01                         | 6.13E-02         | 2.16E-01              |
| rs6121179  | EPB41L1 | 20  | 34,256,911  | 0.19             | Dom                        | 0.92 (0.55-1.53)           | 2.48 (1.33-4.62)     | 0.79 (0.35-1.77)  | 2.81E-02                         | 7.79E-02         | 2.40E-01              |
| rs2768762  | NTRK1   | 1   | 155,127,086 | 0.20             | Dom                        | 1.69 (1.03-2.77)           | 2.53 (1.29-4.96)     | 1.06 (0.51-2.21)  | 8.66E-02                         | 3.42E-02         | 2.42E-01              |
| rs1609761  | KLF16   | 19  | 1,798,698   | 0.21             | Dom                        | 0.55 (0.32-0.94)           | 1.7 (0.94-3.04)      | 2.19 (0.86-5.55)  | 6.49E-01                         | 8.11E-02         | 2.45E-01              |
| rs1296720  | CREBBP  | 16  | 3,813,643   | 0.18             | Dom                        | 1.94 (1.19-3.15)           | 2.1 (1.09-4.04)      | 1.28 (0.61-2.67)  | 3.27E-01                         | 2.36E-02         | 2.51E-01              |
| rs1474976  | EPB41L1 | 20  | 34,195,786  | 0.11             | Add                        | 1.33 (0.77-2.31)           | 1.3 (0.76-2.25)      | 3.41 (1.24-9.39)  | 9.61E-02                         | 6.83E-02         | 2.68E-01              |
| rs6060845  | EPB41L1 | 20  | 34,233,225  | 0.25             | Dom                        | 0.96 (0.59-1.56)           | 2.56 (1.32-4.97)     | 0.98 (0.47-2.01)  | 5.45E-02                         | 1.43E-01         | 2.76E-01              |
| rs2746103  | EPB41L1 | 20  | 34,167,348  | 0.23             | Dom                        | 0.83 (0.51-1.36)           | 2.32 (1.23-4.39)     | 0.94 (0.44-2.02)  | 7.57E-02                         | 1.35E-01         | 2.87E-01              |
| rs11954565 | DRD1    | 5   | 174,782,513 | 0.36             | Dom                        | 2.09 (1.22-3.57)           | 2.63 (1.04-6.62)     | 1.45 (0.81-2.59)  | 2.85E-01                         | 1.65E-02         | 2.87E-01              |
| rs2734833  | DRD2    | 11  | 112,798,130 | 0.42             | Dom                        | 0.48 (0.29-0.78)           | 1.66 (0.78-3.52)     | 1.58 (0.81-3.07)  | 9.22E-01                         | 1.23E-02         | 2.90E-01              |
| rs165774   | COMT    | 22  | 18,332,561  | 0.33             | Dom                        | 0.62 (0.38-1)              | 2.62 (1.32-5.21)     | 1.04 (0.52-2.08)  | 6.44E-02                         | 1.57E-02         | 2.91E-01              |
| rs893541   | KLF16   | 19  | 1,809,183   | 0.19             | Add                        | 0.58 (0.34-0.99)           | 1.5 (0.86-2.63)      | 2.59 (1-6.67)     | 3.23E-01                         | 9.37E-02         | 2.96E-01              |
| rs10423854 | FOSB    | 19  | 50,647,512  | 0.43             | Dom                        | 0.55 (0.34-0.9)            | 1.22 (0.57-2.6)      | 1.98 (1.05-3.72)  | 3.37E-01                         | 4.84E-02         | 3.01E-01              |
| rs7123797  | ANKK1   | 11  | 112,767,781 | 0.36             | Dom                        | 0.6 (0.37-0.97)            | 2.56 (1.27-5.17)     | 1.07 (0.54-2.11)  | 8.07E-02                         | 1.36E-02         | 3.03E-01              |
| rs4938012  | ANKK1   | 11  | 112,764,864 | 0.34             | Dom                        | 0.6 (0.37-0.97)            | 2.56 (1.27-5.17)     | 1.07 (0.54-2.11)  | 8.07E-02                         | 1.36E-02         | 3.04E-01              |
| rs10401329 | KLF16   | 19  | 1,822,699   | 0.13             | Dom                        | 0.54 (0.27-1.08)           | 1.44 (0.83-2.5)      | 4.44 (1.17-16.86) | 1.27E-01                         | 9.12E-02         | 3.13E-01              |
| rs2247688  | EPB41L1 | 20  | 34,238,965  | 0.25             | Dom                        | 0.97 (0.6-1.58)            | 2.59 (1.34-5.04)     | 0.95 (0.46-1.95)  | 4.46E-02                         | 1.22E-01         | 3.16E-01              |

**Supplemental Table 2: SNP-Specific Results for Abstinence Rates at 6-Month Follow-up**

| SNP        | Gene          | Chr | Position    | MAF <sup>a</sup> | Genetic Model <sup>b</sup> | SNP Odds Ratio<br>(95% CI) | Treatment Odds Ratio |                   | Test of Interaction <sup>c</sup> | LRT <sup>d</sup> |            |
|------------|---------------|-----|-------------|------------------|----------------------------|----------------------------|----------------------|-------------------|----------------------------------|------------------|------------|
|            |               |     |             |                  |                            |                            | WT (95% CI)          | Variant (95% CI)  |                                  | Observed P       | Adjusted P |
| rs871058   | CHRNA5        | 15  | 76,645,546  | 0.36             | Dom                        | 0.94 (0.57-1.55)           | 3.63 (1.65-8.02)     | 0.99 (0.54-1.84)  | 1.13E-02                         | 3.08E-02         | 3.21E-01   |
| rs6026593  | GNAS          | 20  | 56,912,528  | 0.11             | Add                        | 0.44 (0.22-0.87)           | 1.84 (1.09-3.1)      | 0.71 (0.2-2.52)   | 1.70E-01                         | 1.74E-02         | 3.31E-01   |
| rs6834765  | SNCA          | 4   | 90,903,013  | 0.08             | Dom                        | 1.39 (0.69-2.82)           | 1.32 (0.78-2.22)     | 7.23 (1.91-27.28) | 1.95E-02                         | 2.92E-02         | 3.32E-01   |
| rs17759598 | MAPK1         | 22  | 20,452,149  | 0.15             | Add                        | 0.67 (0.39-1.16)           | 1.25 (0.73-2.15)     | 3.95 (1.43-10.92) | 4.45E-02                         | 5.70E-02         | 3.47E-01   |
| rs708905   | FOSB          | 19  | 50,669,312  | 0.13             | Add                        | 0.79 (0.45-1.4)            | 1.26 (0.74-2.16)     | 4.22 (1.46-12.22) | 4.30E-02                         | 9.87E-02         | 3.59E-01   |
| rs3897584  | ANKK1         | 11  | 112,754,935 | 0.35             | Dom                        | 0.61 (0.37-0.98)           | 2.56 (1.26-5.19)     | 1.1 (0.56-2.15)   | 8.87E-02                         | 1.77E-02         | 3.64E-01   |
| rs2303933  | CDK5          | 7   | 150,397,732 | 0.43             | Dom                        | 1.46 (0.85-2.5)            | 0.79 (0.32-1.94)     | 2.24 (1.26-4)     | 5.61E-02                         | 4.79E-02         | 3.70E-01   |
| rs2036527  | CHRNA5        | 15  | 76,638,670  | 0.42             | Add                        | 1.03 (0.73-1.47)           | 0.79 (0.38-1.67)     | 1.92 (1.15-3.21)  | 1.48E-02                         | 3.77E-02         | 3.77E-01   |
| rs3971872  | CHRN4         | 15  | 76,729,090  | 0.09             | Add                        | 1.24 (0.68-2.26)           | 1.29 (0.76-2.21)     | 4.48 (1.46-13.73) | 4.79E-02                         | 5.04E-02         | 3.88E-01   |
| rs2737703  | KCNJ9         | 1   | 158,322,556 | 0.36             | Dom                        | 0.81 (0.49-1.32)           | 2.9 (1.33-6.33)      | 1.07 (0.56-2.02)  | 5.29E-02                         | 7.22E-02         | 3.96E-01   |
| rs37022    | SLC6A3        | 5   | 1,468,629   | 0.15             | Dom                        | 0.46 (0.23-0.92)           | 1.43 (0.83-2.45)     | 4.64 (1.25-17.18) | 1.03E-01                         | 3.07E-02         | 3.97E-01   |
| rs6856354  | TDO2          | 4   | 157,068,548 | 0.35             | Dom                        | 0.6 (0.37-0.98)            | 1.95 (0.97-3.94)     | 1.39 (0.7-2.73)   | 4.92E-01                         | 7.46E-02         | 3.98E-01   |
| rs5993891  | COMT          | 22  | 18,339,746  | 0.06             | Add                        | 1.42 (0.67-3)              | 2.04 (1.2-3.48)      | 0.4 (0.1-1.58)    | 3.03E-02                         | 3.78E-02         | 4.01E-01   |
| rs3775085  | TDO2          | 4   | 157,042,829 | 0.10             | Add                        | 1.62 (0.98-2.66)           | 1.47 (0.86-2.52)     | 2.45 (0.98-6.12)  | 3.22E-01                         | 7.11E-02         | 4.03E-01   |
| rs10415949 | FOSB          | 19  | 50,654,639  | 0.24             | Add                        | 0.66 (0.44-1)              | 1.89 (1.05-3.41)     | 1.43 (0.71-2.88)  | 5.16E-01                         | 8.98E-02         | 4.05E-01   |
| rs7122246  | DRD2          | 11  | 112,809,667 | 0.42             | Dom                        | 0.5 (0.31-0.81)            | 1.66 (0.78-3.52)     | 1.68 (0.88-3.21)  | 9.81E-01                         | 2.02E-02         | 4.05E-01   |
| rs555018   | CHRNA3;CHRNA5 | 15  | 76,666,297  | 0.42             | Dom                        | 0.7 (0.42-1.16)            | 3.02 (1.36-6.71)     | 1.19 (0.65-2.19)  | 6.92E-02                         | 5.10E-02         | 4.05E-01   |
| rs4275821  | CHRNA5        | 15  | 76,636,596  | 0.37             | Dom                        | 0.98 (0.59-1.62)           | 3.57 (1.57-8.08)     | 1.05 (0.57-1.92)  | 1.85E-02                         | 5.14E-02         | 4.08E-01   |
| rs863126   | DRD1          | 5   | 174,795,954 | 0.34             | Add                        | 1.52 (1.08-2.14)           | 1.48 (0.72-3.06)     | 1.75 (1.06-2.91)  | 6.29E-01                         | 4.32E-02         | 4.12E-01   |
| rs12280580 | DRD4          | 11  | 616,220     | 0.27             | Dom                        | 0.98 (0.61-1.6)            | 0.95 (0.5-1.81)      | 3.23 (1.56-6.69)  | 1.40E-02                         | 4.66E-02         | 4.17E-01   |
| rs4587762  | DRD2          | 11  | 112,812,103 | 0.43             | Dom                        | 0.51 (0.31-0.82)           | 1.69 (0.8-3.58)      | 1.58 (0.84-3)     | 8.99E-01                         | 2.13E-02         | 4.19E-01   |
| rs7786398  | DDC           | 7   | 50,580,400  | 0.45             | Dom                        | 2.02 (1.03-3.99)           | 5.31 (1.46-19.33)    | 1.31 (0.76-2.25)  | 5.04E-02                         | 2.64E-02         | 4.22E-01   |
| rs6495307  | CHRNA3;CHRNA5 | 15  | 76,677,376  | 0.42             | Dom                        | 0.67 (0.41-1.12)           | 2.84 (1.28-6.31)     | 1.24 (0.67-2.27)  | 1.04E-01                         | 5.74E-02         | 4.40E-01   |
| rs3743077  | CHRNA3;CHRNA5 | 15  | 76,681,951  | 0.39             | Dom                        | 0.66 (0.4-1.11)            | 2.82 (1.27-6.26)     | 1.23 (0.64-2.38)  | 1.16E-01                         | 6.00E-02         | 4.47E-01   |
| rs2240713  | COMT          | 22  | 18,341,101  | 0.05             | Add                        | 1.43 (0.67-3.06)           | 2.18 (1.27-3.74)     | 0.42 (0.1-1.7)    | 3.12E-02                         | 4.57E-02         | 4.53E-01   |
| rs1124491  | ANKK1         | 11  | 112,787,300 | 0.18             | Add                        | 0.56 (0.34-0.92)           | 1.79 (1.03-3.12)     | 1.53 (0.63-3.74)  | 7.63E-01                         | 3.78E-02         | 4.57E-01   |
| rs2471851  | DRD2          | 11  | 112,806,279 | 0.18             | Add                        | 0.55 (0.33-0.91)           | 1.77 (1.02-3.08)     | 1.56 (0.64-3.81)  | 8.03E-01                         | 3.85E-02         | 4.57E-01   |
| rs11214601 | ANKK1         | 11  | 112,777,972 | 0.18             | Add                        | 0.56 (0.34-0.92)           | 1.79 (1.03-3.12)     | 1.53 (0.63-3.74)  | 7.63E-01                         | 3.78E-02         | 4.59E-01   |
| rs4938015  | ANKK1         | 11  | 112,769,854 | 0.35             | Dom                        | 0.61 (0.38-0.99)           | 2.44 (1.2-4.95)      | 1.13 (0.58-2.22)  | 1.23E-01                         | 2.60E-02         | 4.59E-01   |
| rs17115439 | ANKK1         | 11  | 112,769,482 | 0.35             | Dom                        | 0.61 (0.38-0.99)           | 2.44 (1.21-4.95)     | 1.14 (0.58-2.24)  | 1.26E-01                         | 2.59E-02         | 4.61E-01   |
| rs878887   | CRHR1         | 17  | 41,268,363  | 0.20             | Add                        | 1.42 (0.93-2.16)           | 1.27 (0.69-2.33)     | 2.49 (1.26-4.91)  | 1.17E-01                         | 6.89E-02         | 4.93E-01   |
| rs647041   | CHRNA3;CHRNA5 | 15  | 76,667,536  | 0.42             | Dom                        | 0.66 (0.4-1.09)            | 2.66 (1.22-5.81)     | 1.28 (0.69-2.36)  | 1.47E-01                         | 7.06E-02         | 4.99E-01   |
| rs11931074 | SNCA          | 4   | 90,858,538  | 0.08             | Dom                        | 1.25 (0.62-2.5)            | 1.33 (0.79-2.23)     | 6.33 (1.71-23.44) | 2.98E-02                         | 5.57E-02         | 5.09E-01   |
| rs10003708 | SNCA          | 4   | 90,862,074  | 0.08             | Dom                        | 1.25 (0.62-2.5)            | 1.33 (0.79-2.23)     | 6.33 (1.71-23.44) | 2.98E-02                         | 5.57E-02         | 5.10E-01   |
| rs13515    | MAPK1         | 22  | 20,445,886  | 0.19             | Add                        | 0.99 (0.64-1.54)           | 1.16 (0.65-2.08)     | 2.97 (1.4-6.31)   | 3.97E-02                         | 1.03E-01         | 5.11E-01   |
| rs3857051  | SNCA          | 4   | 90,862,720  | 0.08             | Dom                        | 1.25 (0.62-2.5)            | 1.33 (0.79-2.23)     | 6.33 (1.71-23.44) | 2.98E-02                         | 5.57E-02         | 5.12E-01   |
| rs3787493  | GNAS          | 20  | 56,914,543  | 0.46             | Add                        | 1.6 (1.13-2.28)            | 1.95 (0.81-4.7)      | 1.74 (1.07-2.83)  | 7.50E-01                         | 2.82E-02         | 5.13E-01   |
| rs601079   | CHRNA5        | 15  | 76,656,634  | 0.42             | Dom                        | 0.77 (0.46-1.27)           | 3.13 (1.38-7.11)     | 1.19 (0.65-2.16)  | 6.19E-02                         | 7.44E-02         | 5.14E-01   |
| rs4633     | COMT          | 22  | 18,330,235  | 0.47             | Add                        | 1.22 (0.88-1.7)            | 0.85 (0.38-1.91)     | 1.72 (1.06-2.79)  | 3.96E-02                         | 3.88E-02         | 5.18E-01   |

**Supplemental Table 2: SNP-Specific Results for Abstinence Rates at 6-Month Follow-up**

| SNP        | Gene          | Chr | Position    | MAF <sup>a</sup> | Genetic Model <sup>b</sup> | SNP Odds Ratio<br>(95% CI) | Treatment Odds Ratio |                   | Test of Interaction <sup>c</sup> | LRT <sup>d</sup> |            |
|------------|---------------|-----|-------------|------------------|----------------------------|----------------------------|----------------------|-------------------|----------------------------------|------------------|------------|
|            |               |     |             |                  |                            |                            | WT (95% CI)          | Variant (95% CI)  |                                  | Observed P       | Adjusted P |
| rs3775423  | SNCA          | 4   | 90,876,514  | 0.08             | Dom                        | 1.26 (0.63-2.53)           | 1.33 (0.79-2.23)     | 6.21 (1.67-23.01) | 3.20E-02                         | 5.83E-02         | 5.22E-01   |
| rs2164808  | POMC          | 2   | 25,230,680  | 0.41             | Add                        | 0.74 (0.52-1.05)           | 2.34 (1.14-4.82)     | 1.48 (0.88-2.48)  | 2.07E-01                         | 8.81E-02         | 5.32E-01   |
| rs919197   | GNAS          | 20  | 56,914,328  | 0.46             | Add                        | 1.59 (1.12-2.25)           | 1.92 (0.8-4.61)      | 1.74 (1.07-2.84)  | 7.83E-01                         | 3.06E-02         | 5.37E-01   |
| rs950776   | CHRNA4        | 15  | 76,713,073  | 0.35             | Dom                        | 1.13 (0.69-1.86)           | 3.16 (1.46-6.84)     | 1.04 (0.56-1.94)  | 2.86E-02                         | 8.47E-02         | 5.38E-01   |
| rs835637   | NCK1          | 3   | 138,155,847 | 0.45             | Dom                        | 1.63 (0.9-2.95)            | 3.74 (1.26-11.09)    | 1.3 (0.75-2.25)   | 8.87E-02                         | 8.37E-02         | 5.39E-01   |
| rs893539   | KLF16         | 19  | 1,794,493   | 0.25             | Add                        | 1.16 (0.79-1.69)           | 1.35 (0.72-2.51)     | 1.89 (1.02-3.49)  | 3.87E-01                         | 4.45E-01         | 5.41E-01   |
| rs2276469  | FOSB          | 19  | 50,666,433  | 0.45             | Dom                        | 0.65 (0.38-1.11)           | 1.8 (0.75-4.27)      | 1.45 (0.77-2.7)   | 6.92E-01                         | 2.50E-01         | 5.41E-01   |
| rs11665625 | ADCYAP1       | 18  | 890,332     | 0.46             | Add                        | 1.43 (1.01-2.03)           | 3.15 (1.28-7.74)     | 1.75 (1.06-2.88)  | 1.02E-01                         | 4.52E-02         | 5.45E-01   |
| rs12360992 | ANKK1         | 11  | 112,768,110 | 0.49             | Dom                        | 0.59 (0.35-1)              | 2.61 (1.07-6.38)     | 1.29 (0.72-2.32)  | 1.96E-01                         | 3.31E-02         | 5.48E-01   |
| rs11214596 | ANKK1         | 11  | 112,769,721 | 0.49             | Dom                        | 0.59 (0.35-1)              | 2.61 (1.07-6.38)     | 1.29 (0.72-2.32)  | 1.96E-01                         | 3.31E-02         | 5.48E-01   |
| rs1037351  | DDC           | 7   | 50,532,898  | 0.34             | Dom                        | 1.66 (1.01-2.73)           | 1.2 (0.54-2.66)      | 2.14 (1.16-3.95)  | 2.58E-01                         | 4.47E-02         | 5.54E-01   |
| rs2239393  | COMT          | 22  | 18,330,428  | 0.38             | Add                        | 1.15 (0.82-1.6)            | 0.93 (0.46-1.91)     | 1.96 (1.18-3.26)  | 3.22E-02                         | 4.66E-02         | 5.63E-01   |
| rs6558000  | CHRNA2        | 8   | 27,395,271  | 0.07             | Add                        | 0.39 (0.16-0.95)           | 1.63 (0.98-2.7)      | 1.36 (0.25-7.43)  | 8.41E-01                         | 7.12E-02         | 5.65E-01   |
| rs4656874  | KCNJ9         | 1   | 158,311,246 | 0.31             | Add                        | 0.96 (0.66-1.39)           | 2.57 (1.29-5.1)      | 1.28 (0.73-2.23)  | 7.03E-02                         | 1.71E-01         | 5.65E-01   |
| rs834830   | NR4A2         | 2   | 156,911,506 | 0.23             | Dom                        | 1.04 (0.63-1.7)            | 1.1 (0.58-2.06)      | 2.95 (1.36-6.41)  | 5.18E-02                         | 1.30E-01         | 5.71E-01   |
| rs1076560  | ANKK1         | 11  | 112,788,898 | 0.18             | Dom                        | 0.52 (0.3-0.91)            | 1.67 (0.96-2.93)     | 1.8 (0.67-4.82)   | 9.01E-01                         | 5.58E-02         | 5.74E-01   |
| rs754672   | ANKK1         | 11  | 112,754,346 | 0.49             | Dom                        | 0.6 (0.36-1.02)            | 2.73 (1.11-6.71)     | 1.3 (0.73-2.32)   | 1.72E-01                         | 3.63E-02         | 5.74E-01   |
| rs1519097  | DRD5          | 4   | 9,411,951   | 0.32             | Dom                        | 1.08 (0.66-1.77)           | 1.09 (0.53-2.24)     | 2.35 (1.19-4.62)  | 1.30E-01                         | 2.76E-01         | 5.76E-01   |
| rs1317286  | CHRNA3;CHRNA5 | 15  | 76,683,184  | 0.42             | Add                        | 1.04 (0.73-1.47)           | 0.88 (0.42-1.87)     | 1.86 (1.12-3.07)  | 3.77E-02                         | 9.47E-02         | 5.79E-01   |
| rs356219   | SNCA          | 4   | 90,856,624  | 0.38             | Add                        | 0.84 (0.57-1.23)           | 0.89 (0.44-1.8)      | 2.18 (1.25-3.8)   | 2.32E-02                         | 6.36E-02         | 5.87E-01   |
| rs6941712  | EPB41L2       | 6   | 131,323,903 | 0.12             | Add                        | 0.79 (0.46-1.37)           | 2.18 (1.26-3.78)     | 0.66 (0.25-1.75)  | 3.22E-02                         | 6.73E-02         | 5.88E-01   |
| rs1186675  | KCNJ9         | 1   | 158,305,708 | 0.12             | Add                        | 1.02 (0.59-1.78)           | 1.31 (0.75-2.26)     | 3.44 (1.25-9.46)  | 9.69E-02                         | 1.94E-01         | 5.90E-01   |
| rs13106539 | DRD5          | 4   | 9,406,801   | 0.37             | Dom                        | 1.08 (0.66-1.76)           | 1.24 (0.58-2.67)     | 2 (1.07-3.73)     | 3.45E-01                         | 5.92E-01         | 5.92E-01   |
| rs7867364  | FREQ (NCS1)   | 9   | 132,040,103 | 0.17             | Dom                        | 1.14 (0.68-1.91)           | 2.54 (1.4-4.6)       | 0.62 (0.26-1.45)  | 7.96E-03                         | 3.03E-02         | 5.99E-01   |
| rs8140265  | COMT          | 22  | 18,301,641  | 0.27             | Add                        | 1.3 (0.88-1.92)            | 1.13 (0.59-2.18)     | 2.34 (1.3-4.23)   | 6.83E-02                         | 7.60E-02         | 6.00E-01   |
| rs10002435 | SNCA          | 4   | 90,931,534  | 0.11             | Dom                        | 1.37 (0.76-2.48)           | 1.31 (0.76-2.26)     | 4.26 (1.48-12.24) | 5.16E-02                         | 7.50E-02         | 6.01E-01   |
| rs2369406  | KCNJ9         | 1   | 158,331,042 | 0.44             | Add                        | 1.02 (0.72-1.44)           | 0.93 (0.44-2)        | 1.82 (1.1-3.01)   | 6.31E-02                         | 1.53E-01         | 6.07E-01   |
| rs2644620  | NTRK1         | 1   | 155,127,792 | 0.11             | Dom                        | 1.52 (0.88-2.65)           | 2.08 (1.17-3.69)     | 0.99 (0.38-2.56)  | 1.91E-01                         | 1.43E-01         | 6.12E-01   |
| rs4838721  | CALCYON       | 10  | 135,010,940 | 0.19             | Add                        | 0.89 (0.56-1.42)           | 1.3 (0.73-2.32)      | 2.56 (1.16-5.64)  | 1.58E-01                         | 3.39E-01         | 6.17E-01   |
| rs2494211  | KCNJ9         | 1   | 158,325,236 | 0.36             | Dom                        | 0.86 (0.52-1.4)            | 2.65 (1.21-5.79)     | 1.15 (0.61-2.17)  | 1.06E-01                         | 1.76E-01         | 6.18E-01   |
| rs2275723  | CALCYON       | 10  | 134,989,625 | 0.11             | Add                        | 0.76 (0.4-1.44)            | 1.43 (0.84-2.44)     | 3.55 (1.08-11.73) | 1.71E-01                         | 3.00E-01         | 6.25E-01   |
| rs265974   | DRD1          | 5   | 174,793,846 | 0.33             | Add                        | 0.77 (0.53-1.12)           | 2.45 (1.25-4.78)     | 1.31 (0.74-2.3)   | 1.00E-01                         | 6.13E-02         | 6.29E-01   |
| rs11564752 | SLC6A3        | 5   | 1,497,985   | 0.06             | Dom                        | 0.97 (0.33-2.87)           | 1.31 (0.78-2.21)     | 10.39 (1.17-92.4) | 7.10E-02                         | 5.29E-02         | 6.31E-01   |
| rs1079727  | DRD2          | 11  | 112,794,392 | 0.18             | Add                        | 0.58 (0.35-0.95)           | 1.73 (0.99-3.02)     | 1.65 (0.68-4.01)  | 9.30E-01                         | 6.80E-02         | 6.34E-01   |
| rs10891549 | ANKK1         | 11  | 112,783,657 | 0.48             | Dom                        | 0.6 (0.36-1)               | 2.43 (1.02-5.75)     | 1.3 (0.72-2.35)   | 2.45E-01                         | 4.60E-02         | 6.37E-01   |
| rs6881740  | DRD1          | 5   | 174,791,768 | 0.37             | Add                        | 1.47 (1.05-2.06)           | 1.49 (0.7-3.16)      | 1.73 (1.05-2.85)  | 6.67E-01                         | 6.29E-02         | 6.39E-01   |
| rs265973   | DRD1          | 5   | 174,793,305 | 0.44             | Add                        | 0.66 (0.47-0.94)           | 1.7 (0.83-3.47)      | 1.71 (1.02-2.88)  | 9.78E-01                         | 6.36E-02         | 6.50E-01   |
| rs12244716 | CALCYON       | 10  | 134,978,372 | 0.14             | Add                        | 0.76 (0.43-1.31)           | 1.39 (0.81-2.39)     | 2.94 (1.08-8.01)  | 1.91E-01                         | 2.75E-01         | 6.50E-01   |
| rs1866146  | POMC          | 2   | 25,234,077  | 0.34             | Dom                        | 0.99 (0.61-1.63)           | 2.81 (1.3-6.09)      | 1.13 (0.6-2.13)   | 7.43E-02                         | 1.86E-01         | 6.52E-01   |

**Supplemental Table 2: SNP-Specific Results for Abstinence Rates at 6-Month Follow-up**

| SNP        | Gene          | Chr | Position    | MAF <sup>a</sup> | Genetic Model <sup>b</sup> | SNP Odds Ratio<br>(95% CI) | Treatment Odds Ratio |                   | Test of Interaction <sup>c</sup> | LRT <sup>d</sup> |            |
|------------|---------------|-----|-------------|------------------|----------------------------|----------------------------|----------------------|-------------------|----------------------------------|------------------|------------|
|            |               |     |             |                  |                            |                            | WT (95% CI)          | Variant (95% CI)  |                                  | Observed P       | Adjusted P |
| rs1860803  | PRKAR2B       | 7   | 106,567,076 | 0.41             | Dom                        | 0.65 (0.4-1.06)            | 2.47 (1.14-5.33)     | 1.36 (0.73-2.53)  | 2.36E-01                         | 9.29E-02         | 6.55E-01   |
| rs1876828  | CRHR1         | 17  | 41,267,306  | 0.20             | Add                        | 1.32 (0.86-2.04)           | 1.33 (0.71-2.47)     | 2.61 (1.28-5.3)   | 1.30E-01                         | 1.24E-01         | 6.57E-01   |
| rs4810147  | GNAS          | 20  | 56,855,022  | 0.46             | Dom                        | 1.41 (0.78-2.53)           | 4.76 (1.64-13.88)    | 1.17 (0.67-2.04)  | 2.26E-02                         | 4.49E-02         | 6.58E-01   |
| rs1876829  | CRHR1         | 17  | 41,267,224  | 0.21             | Add                        | 1.43 (0.92-2.22)           | 1.3 (0.67-2.53)      | 2.35 (1.16-4.73)  | 1.92E-01                         | 1.13E-01         | 6.64E-01   |
| rs10033209 | SNCA          | 4   | 90,872,727  | 0.08             | Add                        | 1.24 (0.69-2.24)           | 1.35 (0.81-2.28)     | 4.31 (1.42-13.13) | 5.61E-02                         | 1.16E-01         | 6.65E-01   |
| rs11904814 | CREB1         | 2   | 208,135,043 | 0.31             | Add                        | 0.71 (0.48-1.05)           | 1.43 (0.75-2.7)      | 1.91 (1.04-3.54)  | 4.68E-01                         | 2.00E-01         | 6.71E-01   |
| rs403636   | SLC6A3        | 5   | 1,491,354   | 0.17             | Dom                        | 1.42 (0.91-2.21)           | 2.38 (1.27-4.46)     | 0.95 (0.43-2.11)  | 6.94E-02                         | 6.12E-02         | 6.71E-01   |
| rs2551640  | CREB1         | 2   | 208,116,138 | 0.36             | Add                        | 0.72 (0.5-1.04)            | 1.58 (0.81-3.09)     | 1.7 (0.97-2.97)   | 8.51E-01                         | 1.94E-01         | 6.71E-01   |
| rs10033951 | DRD5          | 4   | 9,388,678   | 0.31             | Add                        | 1.23 (0.86-1.76)           | 1.46 (0.74-2.87)     | 1.82 (1.06-3.11)  | 5.47E-01                         | 4.40E-01         | 6.75E-01   |
| rs2069443  | CDK5          | 7   | 150,386,106 | 0.25             | Dom                        | 1.33 (0.82-2.15)           | 2.52 (1.26-5.04)     | 1.08 (0.54-2.15)  | 9.03E-02                         | 1.49E-01         | 6.82E-01   |
| rs4792825  | CRHR1         | 17  | 41,275,461  | 0.13             | Add                        | 0.88 (0.52-1.49)           | 2.13 (1.24-3.66)     | 0.76 (0.3-1.93)   | 5.40E-02                         | 1.27E-01         | 6.83E-01   |
| rs7863731  | FREQ (NCS1)   | 9   | 132,042,626 | 0.39             | Dom                        | 0.69 (0.42-1.14)           | 0.79 (0.37-1.68)     | 2.53 (1.32-4.89)  | 2.26E-02                         | 3.48E-02         | 6.84E-01   |
| rs2072659  | CHRN2         | 1   | 152,815,145 | 0.10             | Add                        | 0.53 (0.24-1.18)           | 1.64 (0.96-2.8)      | 3.32 (0.69-16)    | 4.04E-01                         | 2.23E-01         | 6.84E-01   |
| rs4646312  | COMT          | 22  | 18,328,337  | 0.37             | Add                        | 1.15 (0.83-1.61)           | 0.98 (0.49-2)        | 1.97 (1.18-3.28)  | 4.61E-02                         | 6.86E-02         | 6.85E-01   |
| rs692780   | CHRNA5        | 15  | 76,663,560  | 0.37             | Dom                        | 0.93 (0.57-1.53)           | 3.01 (1.38-6.57)     | 1.13 (0.61-2.1)   | 5.49E-02                         | 1.33E-01         | 6.88E-01   |
| rs265976   | DRD1          | 5   | 174,795,026 | 0.18             | Dom                        | 0.54 (0.3-0.95)            | 1.6 (0.92-2.79)      | 2.18 (0.79-6.06)  | 5.99E-01                         | 8.47E-02         | 6.90E-01   |
| rs12453682 | PPP1R1B       | 17  | 35,023,531  | 0.32             | Dom                        | 0.74 (0.46-1.2)            | 2.12 (1.06-4.27)     | 1.35 (0.69-2.64)  | 3.60E-01                         | 2.70E-01         | 6.90E-01   |
| rs3777464  | EPB41L2       | 6   | 131,308,450 | 0.10             | Add                        | 0.77 (0.42-1.41)           | 2.07 (1.21-3.52)     | 0.62 (0.21-1.86)  | 4.96E-02                         | 9.45E-02         | 6.94E-01   |
| rs1948     | CHRNA3;CHRN4  | 15  | 76,704,454  | 0.35             | Dom                        | 0.81 (0.5-1.32)            | 2.7 (1.31-5.57)      | 1.16 (0.61-2.22)  | 9.01E-02                         | 1.38E-01         | 6.95E-01   |
| rs356220   | SNCA          | 4   | 90,860,363  | 0.36             | Add                        | 0.92 (0.62-1.39)           | 0.8 (0.38-1.68)      | 1.96 (1.08-3.55)  | 3.27E-02                         | 9.52E-02         | 6.97E-01   |
| rs165656   | COMT          | 22  | 18,328,863  | 0.47             | Add                        | 1.23 (0.89-1.71)           | 0.98 (0.44-2.19)     | 1.77 (1.09-2.89)  | 8.00E-02                         | 7.03E-02         | 6.99E-01   |
| rs4947644  | DDC           | 7   | 50,586,370  | 0.50             | Dom                        | 1.56 (0.79-3.08)           | 5.6 (1.52-20.67)     | 1.28 (0.74-2.18)  | 4.02E-02                         | 6.58E-02         | 6.99E-01   |
| rs10445364 | CRHR1         | 17  | 41,272,136  | 0.20             | Add                        | 1.29 (0.85-1.97)           | 1.28 (0.7-2.34)      | 2.44 (1.22-4.85)  | 1.37E-01                         | 1.40E-01         | 7.03E-01   |
| rs265975   | DRD1          | 5   | 174,794,801 | 0.33             | Add                        | 0.6 (0.37-0.97)            | 2.07 (1.07-4)        | 1.37 (0.77-2.43)  | 6.31E-01                         | 8.19E-02         | 7.04E-01   |
| rs356203   | SNCA          | 4   | 90,885,064  | 0.38             | Add                        | 0.87 (0.6-1.28)            | 0.93 (0.46-1.9)      | 2.1 (1.22-3.63)   | 3.81E-02                         | 1.06E-01         | 7.05E-01   |
| rs6532190  | SNCA          | 4   | 90,938,219  | 0.06             | Dom                        | 1.21 (0.56-2.61)           | 1.4 (0.84-2.34)      | 6.18 (1.4-27.26)  | 6.39E-02                         | 1.18E-01         | 7.07E-01   |
| rs17016188 | SNCA          | 4   | 90,940,903  | 0.06             | Dom                        | 1.21 (0.56-2.61)           | 1.4 (0.84-2.34)      | 6.18 (1.4-27.26)  | 6.39E-02                         | 1.18E-01         | 7.08E-01   |
| rs514743   | CHRNA3;CHRNA5 | 15  | 76,671,282  | 0.37             | Dom                        | 0.93 (0.57-1.53)           | 2.88 (1.32-6.28)     | 1.16 (0.63-2.16)  | 7.45E-02                         | 1.74E-01         | 7.09E-01   |
| rs11765748 | DDC           | 7   | 50,583,110  | 0.49             | Dom                        | 1.68 (0.85-3.32)           | 5.24 (1.42-19.28)    | 1.31 (0.76-2.24)  | 5.39E-02                         | 6.93E-02         | 7.11E-01   |
| rs4837479  | FREQ (NCS1)   | 9   | 131,979,828 | 0.15             | Dom                        | 0.9 (0.51-1.58)            | 1.16 (0.67-2.03)     | 4.53 (1.65-12.5)  | 2.12E-02                         | 5.76E-02         | 7.12E-01   |
| rs709611   | FREQ (NCS1)   | 9   | 132,038,180 | 0.28             | Dom                        | 1.38 (0.94-2.04)           | 2.91 (1.38-6.12)     | 1.02 (0.53-1.96)  | 4.03E-02                         | 4.29E-02         | 7.13E-01   |
| rs1878399  | CHRNA3;CHRN4  | 15  | 76,699,058  | 0.42             | Dom                        | 0.73 (0.44-1.22)           | 2.6 (1.17-5.78)      | 1.35 (0.73-2.49)  | 2.02E-01                         | 1.67E-01         | 7.14E-01   |
| rs1051730  | CHRNA3;CHRNA5 | 15  | 76,681,394  | 0.41             | Add                        | 0.96 (0.68-1.36)           | 0.93 (0.45-1.93)     | 1.86 (1.11-3.11)  | 5.35E-02                         | 1.49E-01         | 7.16E-01   |
| rs16891620 | CHRNA6        | 8   | 42,744,820  | 0.11             | Add                        | 0.64 (0.35-1.18)           | 1.53 (0.91-2.6)      | 2.29 (0.74-7.12)  | 5.25E-01                         | 3.03E-01         | 7.16E-01   |
| rs10499695 | DDC           | 7   | 50,586,098  | 0.49             | Dom                        | 1.77 (0.89-3.51)           | 4.93 (1.33-18.22)    | 1.34 (0.78-2.3)   | 7.12E-02                         | 7.16E-02         | 7.17E-01   |
| rs6277     | ANKK1         | 11  | 112,788,669 | 0.48             | Dom                        | 0.61 (0.36-1.04)           | 2.49 (1.02-6.07)     | 1.36 (0.75-2.44)  | 2.63E-01                         | 5.90E-02         | 7.18E-01   |
| rs7369949  | CREB1         | 2   | 208,159,033 | 0.36             | Add                        | 0.73 (0.51-1.05)           | 1.55 (0.79-3.03)     | 1.73 (0.99-3.02)  | 7.61E-01                         | 2.27E-01         | 7.20E-01   |
| rs6495309  | CHRNA3;CHRN4  | 15  | 76,702,300  | 0.15             | Add                        | 1.17 (0.73-1.87)           | 2.17 (1.2-3.91)      | 1.02 (0.46-2.24)  | 1.17E-01                         | 2.37E-01         | 7.21E-01   |
| rs2867383  | DRD5          | 4   | 9,397,033   | 0.32             | Add                        | 1.14 (0.7-1.85)            | 1.45 (0.74-2.87)     | 1.79 (1.05-3.06)  | 3.04E-01                         | 4.73E-01         | 7.22E-01   |



**Supplemental Table 2: SNP-Specific Results for Abstinence Rates at 6-Month Follow-up**

| SNP        | Gene          | Chr | Position    | MAF <sup>a</sup> | Genetic Model <sup>b</sup> | SNP Odds Ratio<br>(95% CI) | Treatment Odds Ratio |                   | Test of Interaction <sup>c</sup> | LRT <sup>d</sup> |            |
|------------|---------------|-----|-------------|------------------|----------------------------|----------------------------|----------------------|-------------------|----------------------------------|------------------|------------|
|            |               |     |             |                  |                            |                            | WT (95% CI)          | Variant (95% CI)  |                                  | Observed P       | Adjusted P |
| rs9616     | CHRNA2        | 1   | 152,822,357 | 0.27             | Add                        | 1.33 (0.92-1.94)           | 1.61 (0.83-3.13)     | 1.65 (0.93-2.92)  | 9.58E-01                         | 3.19E-01         | 7.25E-01   |
| rs7539745  | CHRNA2        | 1   | 152,793,038 | 0.14             | Dom                        | 1.57 (0.93-2.65)           | 1.91 (1.06-3.43)     | 1.27 (0.53-3.05)  | 4.50E-01                         | 2.00E-01         | 7.25E-01   |
| rs3730168  | GNAS          | 20  | 56,912,334  | 0.34             | Add                        | 0.68 (0.47-0.99)           | 1.85 (0.96-3.54)     | 1.51 (0.85-2.68)  | 5.96E-01                         | 8.69E-02         | 7.25E-01   |
| rs1127313  | CHRNA2        | 1   | 152,823,049 | 0.47             | Dom                        | 1.32 (0.93-1.89)           | 2.45 (0.85-7.09)     | 1.48 (0.86-2.55)  | 8.88E-01                         | 2.78E-01         | 7.26E-01   |
| rs1587176  | DRD1          | 5   | 174,783,796 | 0.16             | Add                        | 0.59 (0.35-1.01)           | 1.65 (0.96-2.85)     | 1.9 (0.72-5.02)   | 8.01E-01                         | 1.30E-01         | 7.28E-01   |
| rs7655090  | DRD5          | 4   | 9,374,973   | 0.32             | Add                        | 1.22 (0.85-1.74)           | 1.51 (0.76-2.99)     | 1.76 (1.03-3)     | 6.71E-01                         | 5.04E-01         | 7.29E-01   |
| rs11667211 | KLF16         | 19  | 1,790,483   | 0.14             | Add                        | 1.33 (0.84-2.11)           | 1.57 (0.89-2.77)     | 2.13 (0.96-4.72)  | 5.16E-01                         | 4.17E-01         | 7.30E-01   |
| rs835540   | DRD1          | 5   | 174,796,497 | 0.27             | Dom                        | 1.61 (1-2.61)              | 1.45 (0.75-2.8)      | 2.09 (1.02-4.29)  | 4.60E-01                         | 9.34E-02         | 7.31E-01   |
| rs3761264  | GNAS          | 20  | 56,846,766  | 0.43             | Dom                        | 1.27 (0.73-2.22)           | 4.33 (1.6-11.7)      | 1.15 (0.65-2.02)  | 2.34E-02                         | 5.77E-02         | 7.33E-01   |
| rs7118900  | ANKK1         | 11  | 112,772,031 | 0.20             | Add                        | 0.64 (0.4-1.01)            | 1.95 (1.1-3.44)      | 1.37 (0.62-3.05)  | 4.61E-01                         | 7.42E-02         | 7.36E-01   |
| rs8137828  | COMT          | 22  | 18,303,406  | 0.49             | Add                        | 0.89 (0.64-1.25)           | 3.24 (1.42-7.41)     | 1.62 (1-2.64)     | 4.57E-02                         | 8.48E-02         | 7.40E-01   |
| rs11633223 | CHRNA4        | 15  | 76,722,531  | 0.38             | Dom                        | 0.86 (0.52-1.41)           | 2.8 (1.3-6.03)       | 1.18 (0.63-2.21)  | 8.78E-02                         | 1.69E-01         | 7.41E-01   |
| rs835634   | NCK1          | 3   | 138,158,993 | 0.41             | Dom                        | 1.59 (0.92-2.72)           | 2.68 (1.04-6.9)      | 1.42 (0.8-2.51)   | 2.61E-01                         | 1.61E-01         | 7.45E-01   |
| rs7178270  | CHRNA3;CHRNA4 | 15  | 76,708,132  | 0.40             | Dom                        | 0.98 (0.59-1.62)           | 3 (1.32-6.83)        | 1.2 (0.66-2.18)   | 7.69E-02                         | 1.94E-01         | 7.46E-01   |
| rs891507   | CDK5          | 7   | 150,382,999 | 0.15             | Dom                        | 0.65 (0.35-1.2)            | 1.44 (0.82-2.53)     | 3.05 (1.01-9.23)  | 2.38E-01                         | 2.31E-01         | 7.47E-01   |
| rs737865   | COMT          | 22  | 18,310,121  | 0.27             | Dom                        | 1.35 (0.84-2.19)           | 1.18 (0.59-2.34)     | 2.41 (1.22-4.76)  | 1.46E-01                         | 1.24E-01         | 7.49E-01   |
| rs1495099  | PPP1R1B       | 17  | 35,037,990  | 0.30             | Dom                        | 0.77 (0.48-1.25)           | 2.08 (1.06-4.08)     | 1.3 (0.65-2.62)   | 3.48E-01                         | 3.27E-01         | 7.52E-01   |
| rs3793336  | CDK5          | 7   | 150,393,804 | 0.15             | Add                        | 0.74 (0.37-1.47)           | 1.42 (0.73-2.76)     | 4.73 (1.29-17.32) | 9.86E-02                         | 1.99E-01         | 7.54E-01   |
| rs1549760  | CDK5          | 7   | 150,386,772 | 0.21             | Dom                        | 1.39 (0.85-2.26)           | 2.23 (1.15-4.3)      | 1.17 (0.56-2.41)  | 1.97E-01                         | 2.13E-01         | 7.59E-01   |
| rs6518592  | COMT          | 22  | 18,307,146  | 0.45             | Dom                        | 0.7 (0.42-1.17)            | 2.63 (1.14-6.08)     | 1.34 (0.74-2.42)  | 1.96E-01                         | 1.35E-01         | 7.59E-01   |
| rs2565059  | CHRNA2        | 8   | 27,392,895  | 0.19             | Add                        | 1.48 (0.98-2.24)           | 1.43 (0.78-2.63)     | 2.15 (1.09-4.21)  | 3.43E-01                         | 1.06E-01         | 7.61E-01   |
| rs3753612  | HCRTR1        | 1   | 31,854,997  | 0.47             | Add                        | 0.83 (0.48-1.44)           | 1.22 (0.53-2.78)     | 1.76 (1.06-2.92)  | 1.89E-01                         | 3.54E-01         | 7.64E-01   |
| rs8006462  | CALM1         | 14  | 89,948,429  | 0.35             | Add                        | 1.38 (0.98-1.95)           | 1.86 (0.89-3.91)     | 1.74 (1.05-2.9)   | 8.51E-01                         | 1.90E-01         | 7.67E-01   |
| rs10939515 | DRD5          | 4   | 9,382,394   | 0.18             | Dom                        | 1.44 (0.87-2.36)           | 1.77 (0.97-3.23)     | 1.44 (0.64-3.21)  | 6.86E-01                         | 3.61E-01         | 7.68E-01   |
| rs4789182  | GRB2          | 17  | 70,886,540  | 0.32             | Dom                        | 0.9 (0.63-1.29)            | 1.94 (0.95-3.96)     | 1.42 (0.73-2.75)  | 4.89E-01                         | 6.44E-01         | 7.70E-01   |
| rs7638876  | DRD3          | 3   | 115,376,990 | 0.35             | Add                        | 1.37 (0.97-1.95)           | 2.28 (1.08-4.81)     | 1.57 (0.94-2.61)  | 2.95E-01                         | 1.30E-01         | 7.70E-01   |
| rs1213365  | HTR1B         | 6   | 78,233,274  | 0.50             | Dom                        | 1.92 (0.95-3.88)           | 4.44 (1.17-16.89)    | 1.43 (0.82-2.49)  | 1.25E-01                         | 7.60E-02         | 7.74E-01   |
| rs610231   | OPRM1         | 6   | 154,420,170 | 0.12             | Add                        | 0.63 (0.35-1.13)           | 1.92 (1.13-3.27)     | 0.94 (0.33-2.74)  | 2.34E-01                         | 9.08E-02         | 7.74E-01   |
| rs13428823 | POMC          | 2   | 25,226,802  | 0.37             | Add                        | 0.82 (0.57-1.18)           | 2.22 (1.09-4.53)     | 1.47 (0.87-2.48)  | 2.67E-01                         | 2.68E-01         | 7.77E-01   |
| rs6545976  | POMC          | 2   | 25,248,154  | 0.05             | Add                        | 1.6 (0.79-3.26)            | 1.85 (1.1-3.12)      | 0.93 (0.25-3.44)  | 3.38E-01                         | 2.68E-01         | 7.80E-01   |
| rs6280     | DRD3          | 3   | 115,373,505 | 0.34             | Add                        | 1.35 (0.94-1.94)           | 2.57 (1.2-5.51)      | 1.6 (0.95-2.7)    | 2.03E-01                         | 1.36E-01         | 7.82E-01   |
| rs9825563  | DRD3          | 3   | 115,382,910 | 0.31             | Dom                        | 1.11 (0.68-1.8)            | 2.04 (0.98-4.23)     | 1.5 (0.78-2.9)    | 5.45E-01                         | 7.87E-01         | 7.87E-01   |
| rs1936158  | HTR1B         | 6   | 78,241,094  | 0.41             | Dom                        | 0.67 (0.41-1.1)            | 2.44 (1.12-5.31)     | 1.26 (0.67-2.35)  | 1.95E-01                         | 8.55E-02         | 7.88E-01   |
| rs4887069  | CHRNA3;CHRNA4 | 15  | 76,696,125  | 0.17             | Add                        | 1.05 (0.66-1.67)           | 2.09 (1.15-3.77)     | 1.08 (0.5-2.32)   | 1.61E-01                         | 3.65E-01         | 7.88E-01   |
| rs637137   | CHRNA5        | 15  | 76,661,031  | 0.16             | Add                        | 1.25 (0.79-1.99)           | 2.05 (1.12-3.75)     | 1.24 (0.58-2.63)  | 2.84E-01                         | 3.61E-01         | 7.89E-01   |
| rs667282   | CHRNA5        | 15  | 76,650,527  | 0.16             | Add                        | 1.25 (0.79-1.99)           | 2.05 (1.12-3.75)     | 1.24 (0.58-2.63)  | 2.84E-01                         | 3.61E-01         | 7.89E-01   |
| rs165824   | COMT          | 22  | 18,339,366  | 0.08             | Dom                        | 1.19 (0.57-2.47)           | 1.4 (0.82-2.4)       | 4.93 (1.22-19.93) | 9.99E-02                         | 1.30E-01         | 7.89E-01   |
| rs1044396  | CHRNA4        | 20  | 61,451,578  | 0.44             | Add                        | 0.84 (0.58-1.23)           | 2.7 (1.18-6.18)      | 1.47 (0.87-2.48)  | 1.15E-01                         | 1.48E-01         | 7.92E-01   |
| rs10914457 | HCRTR1        | 1   | 31,866,848  | 0.40             | Add                        | 0.97 (0.68-1.4)            | 2.33 (1.06-5.09)     | 1.66 (0.98-2.8)   | 3.66E-01                         | 6.49E-01         | 7.92E-01   |

**Supplemental Table 2: SNP-Specific Results for Abstinence Rates at 6-Month Follow-up**

| SNP        | Gene          | Chr | Position    | MAF <sup>a</sup> | Genetic Model <sup>b</sup> | SNP Odds Ratio<br>(95% CI) | Treatment Odds Ratio |                     | Test of Interaction <sup>c</sup> | LRT <sup>d</sup> |            |
|------------|---------------|-----|-------------|------------------|----------------------------|----------------------------|----------------------|---------------------|----------------------------------|------------------|------------|
|            |               |     |             |                  |                            |                            | WT (95% CI)          | Variant (95% CI)    |                                  | Observed P       | Adjusted P |
| rs6271     | DBH           | 9   | 135,512,095 | 0.08             | Dom                        | 0.4 (0.14-1.16)            | 1.55 (0.93-2.58)     | 7.18 (0.83-62.14)   | 1.76E-01                         | 9.58E-02         | 7.92E-01   |
| rs10914456 | HCRTR1        | 1   | 31,860,758  | 0.45             | Dom                        | 0.74 (0.42-1.3)            | 2.04 (0.8-5.2)       | 2 (1.04-3.82)       | 9.70E-01                         | 5.79E-01         | 7.93E-01   |
| rs2303937  | CDK5          | 7   | 150,399,719 | 0.45             | Dom                        | 1.45 (0.82-2.58)           | 2.84 (1.01-8)        | 1.41 (0.81-2.44)    | 2.41E-01                         | 2.63E-01         | 7.94E-01   |
| rs1004446  | TH            | 11  | 2,126,719   | 0.38             | Dom                        | 1.34 (0.79-2.25)           | 3.1 (1.28-7.48)      | 1.22 (0.67-2.2)     | 8.63E-02                         | 1.56E-01         | 7.96E-01   |
| rs356165   | SNCA          | 4   | 90,865,909  | 0.40             | Add                        | 0.89 (0.59-1.34)           | 0.91 (0.42-2.02)     | 2.12 (1.19-3.76)    | 4.69E-02                         | 1.31E-01         | 7.97E-01   |
| rs174699   | COMT          | 22  | 18,334,458  | 0.05             | Dom                        | 0.92 (0.37-2.26)           | 1.5 (0.91-2.47)      | 5 (0.85-29.47)      | 2.00E-01                         | 4.06E-01         | 7.97E-01   |
| rs5993883  | COMT          | 22  | 18,317,638  | 0.49             | Dom                        | 0.98 (0.57-1.69)           | 0.71 (0.28-1.8)      | 2.26 (1.28-4)       | 3.74E-02                         | 1.14E-01         | 7.99E-01   |
| rs10988625 | FREQ (NCS1)   | 9   | 131,967,389 | 0.06             | Dom                        | 0.58 (0.2-1.68)            | 1.38 (0.83-2.29)     | 12.02 (1.38-104.57) | 5.62E-02                         | 6.85E-02         | 7.99E-01   |
| rs6334     | NTRK1         | 1   | 155,112,857 | 0.24             | Dom                        | 1.51 (0.93-2.46)           | 1.85 (0.94-3.65)     | 1.6 (0.79-3.23)     | 7.70E-01                         | 2.41E-01         | 8.00E-01   |
| rs17690326 | CRHR1         | 17  | 41,276,754  | 0.20             | Add                        | 1.26 (0.83-1.92)           | 1.28 (0.7-2.33)      | 2.35 (1.18-4.69)    | 1.58E-01                         | 1.86E-01         | 8.03E-01   |
| rs3795955  | POMC          | 2   | 25,228,609  | 0.25             | Dom                        | 0.92 (0.56-1.5)            | 2.21 (1.18-4.14)     | 1.09 (0.5-2.34)     | 1.59E-01                         | 3.27E-01         | 8.03E-01   |
| rs11737901 | SLC6A3        | 5   | 1,483,616   | 0.34             | Dom                        | 1.18 (0.72-1.94)           | 0.88 (0.4-1.91)      | 2.48 (1.32-4.65)    | 4.23E-02                         | 8.62E-02         | 8.04E-01   |
| rs3743073  | CHRNA3;CHRNB4 | 15  | 76,696,594  | 0.38             | Dom                        | 0.94 (0.57-1.53)           | 2.72 (1.24-5.96)     | 1.22 (0.66-2.26)    | 1.17E-01                         | 2.59E-01         | 8.06E-01   |
| rs755203   | CHRNA4        | 20  | 61,464,708  | 0.42             | Add                        | 0.81 (0.56-1.16)           | 2.42 (1.11-5.29)     | 1.58 (0.94-2.66)    | 2.60E-01                         | 2.06E-01         | 8.06E-01   |
| rs7589318  | POMC          | 2   | 25,231,876  | 0.28             | Dom                        | 0.77 (0.52-1.13)           | 1.62 (0.85-3.08)     | 1.72 (0.83-3.55)    | 9.38E-01                         | 3.95E-01         | 8.07E-01   |
| rs4870266  | OPRM1         | 6   | 154,410,691 | 0.07             | Add                        | 1.8 (0.95-3.4)             | 1.54 (0.9-2.61)      | 2.5 (0.77-8.08)     | 4.58E-01                         | 1.30E-01         | 8.10E-01   |
| rs4797325  | ADCYAP1       | 18  | 879,905     | 0.40             | Dom                        | 0.62 (0.38-1.02)           | 1.19 (0.56-2.55)     | 2.1 (1.09-4.06)     | 2.70E-01                         | 1.10E-01         | 8.11E-01   |
| rs2985331  | EPB41         | 1   | 29,207,950  | 0.15             | Dom                        | 1.71 (1.03-2.84)           | 1.67 (0.91-3.05)     | 1.83 (0.81-4.16)    | 8.58E-01                         | 1.16E-01         | 8.11E-01   |
| rs1800497  | ANKK1         | 11  | 112,776,038 | 0.22             | Dom                        | 0.59 (0.34-1.02)           | 1.8 (0.97-3.34)      | 1.62 (0.65-4.07)    | 8.53E-01                         | 1.29E-01         | 8.17E-01   |
| rs938682   | CHRNA3        | 15  | 76,683,602  | 0.16             | Add                        | 1.21 (0.76-1.93)           | 2.02 (1.12-3.66)     | 1.22 (0.57-2.61)    | 2.82E-01                         | 4.09E-01         | 8.19E-01   |
| rs3743075  | CHRNA3;CHRNB4 | 15  | 76,696,507  | 0.37             | Dom                        | 0.99 (0.6-1.62)            | 2.7 (1.23-5.91)      | 1.22 (0.66-2.25)    | 1.16E-01                         | 2.79E-01         | 8.22E-01   |
| rs887200   | COMT          | 22  | 18,343,666  | 0.13             | Dom                        | 1.67 (0.97-2.9)            | 2.08 (1.14-3.82)     | 1.21 (0.48-3.02)    | 3.34E-01                         | 1.38E-01         | 8.28E-01   |
| rs3743078  | CHRNA3;CHRNA5 | 15  | 76,681,814  | 0.17             | Add                        | 1.21 (0.77-1.9)            | 1.97 (1.08-3.59)     | 1.32 (0.63-2.75)    | 3.81E-01                         | 4.77E-01         | 8.29E-01   |
| rs2168631  | DRD1          | 5   | 174,808,608 | 0.17             | Add                        | 1.41 (0.92-2.18)           | 2.1 (1.14-3.85)      | 1.16 (0.57-2.36)    | 1.86E-01                         | 1.58E-01         | 8.37E-01   |
| rs684513   | CHRNA5        | 15  | 76,645,455  | 0.14             | Dom                        | 1.31 (0.77-2.21)           | 1.96 (1.09-3.55)     | 1.35 (0.56-3.24)    | 4.87E-01                         | 4.95E-01         | 8.37E-01   |
| rs9972882  | PPP1R1B       | 17  | 35,061,224  | 0.27             | Dom                        | 0.95 (0.58-1.53)           | 2.09 (1.09-4.02)     | 1.26 (0.62-2.57)    | 3.00E-01                         | 5.49E-01         | 8.39E-01   |
| rs7543174  | CHRNB2        | 1   | 152,794,296 | 0.16             | Dom                        | 1.32 (0.79-2.21)           | 1.78 (0.99-3.19)     | 1.45 (0.62-3.42)    | 7.04E-01                         | 5.49E-01         | 8.39E-01   |
| rs3773679  | DRD3          | 3   | 115,352,025 | 0.39             | Dom                        | 0.82 (0.5-1.34)            | 0.96 (0.45-2.05)     | 2.39 (1.27-4.53)    | 7.12E-02                         | 1.59E-01         | 8.39E-01   |
| rs234628   | GNAS          | 20  | 56,919,006  | 0.43             | Add                        | 1.42 (1-2.02)              | 2.05 (0.9-4.72)      | 1.69 (1.04-2.75)    | 5.81E-01                         | 1.27E-01         | 8.40E-01   |
| rs11603404 | DRD4          | 11  | 646,940     | 0.15             | Dom                        | 0.91 (0.52-1.58)           | 1.26 (0.72-2.21)     | 3.49 (1.31-9.24)    | 7.75E-02                         | 1.96E-01         | 8.40E-01   |
| rs11766415 | PRKAR2B       | 7   | 106,496,001 | 0.43             | Add                        | 1 (0.71-1.4)               | 0.9 (0.43-1.9)       | 1.86 (1.13-3.07)    | 3.97E-02                         | 1.15E-01         | 8.42E-01   |
| rs879606   | PPP1R1B       | 17  | 35,035,375  | 0.19             | Add                        | 1.29 (0.86-1.94)           | 1.64 (0.91-2.96)     | 1.64 (0.83-3.24)    | 9.95E-01                         | 4.78E-01         | 8.44E-01   |
| rs11739696 | DRD1          | 5   | 174,789,227 | 0.39             | Add                        | 1.36 (0.98-1.9)            | 1.44 (0.68-3.05)     | 1.74 (1.06-2.85)    | 5.88E-01                         | 1.46E-01         | 8.47E-01   |
| rs267417   | DRD1          | 5   | 174,813,120 | 0.39             | Add                        | 0.8 (0.57-1.13)            | 1.13 (0.58-2.22)     | 2.01 (1.16-3.46)    | 1.06E-01                         | 1.45E-01         | 8.47E-01   |
| rs6509214  | FOSB          | 19  | 50,673,655  | 0.34             | Dom                        | 0.87 (0.54-1.41)           | 1.64 (0.81-3.32)     | 1.79 (0.91-3.5)     | 8.66E-01                         | 8.48E-01         | 8.48E-01   |
| rs11265320 | KCNJ9         | 1   | 158,336,536 | 0.48             | Add                        | 0.95 (0.68-1.32)           | 2.41 (1.06-5.47)     | 1.64 (1.01-2.66)    | 2.70E-01                         | 4.79E-01         | 8.48E-01   |
| rs9044     | TDO2          | 4   | 157,065,537 | 0.50             | Dom                        | 0.65 (0.39-1.09)           | 1.57 (0.67-3.66)     | 1.71 (0.95-3.07)    | 8.72E-01                         | 2.74E-01         | 8.50E-01   |
| rs4485648  | COMT          | 22  | 18,299,405  | 0.18             | Add                        | 0.7 (0.44-1.14)            | 1.57 (0.89-2.75)     | 1.92 (0.83-4.46)    | 6.83E-01                         | 3.37E-01         | 8.50E-01   |
| rs1343491  | HTR1B         | 6   | 78,247,981  | 0.08             | Add                        | 0.84 (0.44-1.61)           | 2.04 (1.2-3.47)      | 0.57 (0.17-1.87)    | 5.10E-02                         | 1.30E-01         | 8.52E-01   |

**Supplemental Table 2: SNP-Specific Results for Abstinence Rates at 6-Month Follow-up**

| SNP        | Gene          | Chr | Position    | MAF <sup>a</sup> | Genetic Model <sup>b</sup> | SNP Odds Ratio<br>(95% CI) | Treatment Odds Ratio |                   | Test of Interaction <sup>c</sup> | LRT <sup>d</sup> |            |
|------------|---------------|-----|-------------|------------------|----------------------------|----------------------------|----------------------|-------------------|----------------------------------|------------------|------------|
|            |               |     |             |                  |                            |                            | WT (95% CI)          | Variant (95% CI)  |                                  | Observed P       | Adjusted P |
| rs3777438  | EPB41L2       | 6   | 131,241,795 | 0.16             | Dom                        | 0.98 (0.58-1.66)           | 2.23 (1.24-4.01)     | 0.83 (0.34-2.02)  | 6.98E-02                         | 1.87E-01         | 8.52E-01   |
| rs963468   | DRD3          | 3   | 115,345,577 | 0.39             | Dom                        | 0.8 (0.49-1.32)            | 0.97 (0.45-2.09)     | 2.37 (1.26-4.48)  | 7.96E-02                         | 1.67E-01         | 8.52E-01   |
| rs9321260  | EPB41L2       | 6   | 131,305,235 | 0.19             | Dom                        | 1.04 (0.63-1.72)           | 2.3 (1.26-4.2)       | 0.89 (0.39-2.01)  | 6.65E-02                         | 1.86E-01         | 8.52E-01   |
| rs1544325  | COMT          | 22  | 18,311,668  | 0.45             | Add                        | 0.85 (0.61-1.19)           | 2.71 (1.25-5.87)     | 1.56 (0.95-2.54)  | 1.12E-01                         | 1.52E-01         | 8.52E-01   |
| rs740603   | COMT          | 22  | 18,325,177  | 0.49             | Dom                        | 1.17 (0.67-2.02)           | 0.9 (0.35-2.32)      | 2.07 (1.18-3.62)  | 1.40E-01                         | 2.57E-01         | 8.54E-01   |
| rs3180694  | KCNJ9         | 1   | 158,328,008 | 0.12             | Dom                        | 0.9 (0.5-1.61)             | 1.47 (0.85-2.53)     | 2.57 (0.9-7.38)   | 3.53E-01                         | 6.32E-01         | 8.57E-01   |
| rs2536503  | PRKAR2B       | 7   | 106,501,051 | 0.12             | Add                        | 0.66 (0.38-1.15)           | 1.9 (1.11-3.24)      | 0.98 (0.36-2.7)   | 2.47E-01                         | 1.45E-01         | 8.57E-01   |
| rs11564753 | SLC6A3        | 5   | 1,496,990   | 0.21             | Add                        | 0.91 (0.6-1.38)            | 1.83 (1.02-3.27)     | 1.43 (0.71-2.88)  | 5.66E-01                         | 7.51E-01         | 8.57E-01   |
| rs7569963  | CREB1         | 2   | 208,181,429 | 0.29             | Add                        | 0.77 (0.51-1.14)           | 1.45 (0.77-2.73)     | 1.85 (0.99-3.45)  | 5.58E-01                         | 3.79E-01         | 8.58E-01   |
| rs2292536  | TDO2          | 4   | 157,059,101 | 0.47             | Add                        | 1.19 (0.86-1.65)           | 1.81 (0.8-4.07)      | 1.68 (1.04-2.72)  | 8.25E-01                         | 5.65E-01         | 8.59E-01   |
| rs11765015 | CDK5          | 7   | 150,401,765 | 0.26             | Dom                        | 1.27 (0.79-2.05)           | 1.95 (0.99-3.87)     | 1.39 (0.7-2.76)   | 4.94E-01                         | 5.27E-01         | 8.59E-01   |
| rs3822090  | SNCA          | 4   | 90,923,899  | 0.13             | Dom                        | 1.27 (0.73-2.23)           | 1.36 (0.78-2.37)     | 3.31 (1.23-8.89)  | 1.24E-01                         | 1.94E-01         | 8.59E-01   |
| rs12718574 | DDC           | 7   | 50,541,342  | 0.44             | Dom                        | 0.78 (0.46-1.31)           | 2.99 (1.24-7.18)     | 1.25 (0.7-2.25)   | 1.06E-01                         | 1.24E-01         | 8.59E-01   |
| rs6702335  | EPB41         | 1   | 29,283,837  | 0.38             | Add                        | 0.7 (0.49-1)               | 1.69 (0.85-3.36)     | 1.61 (0.94-2.74)  | 8.94E-01                         | 1.28E-01         | 8.61E-01   |
| rs10932201 | CREB1         | 2   | 208,134,502 | 0.46             | Add                        | 1.25 (0.88-1.77)           | 1.95 (0.84-4.54)     | 1.66 (1.02-2.69)  | 6.50E-01                         | 4.37E-01         | 8.64E-01   |
| rs6350     | SLC6A3        | 5   | 1,496,199   | 0.06             | Add                        | 0.44 (0.17-1.1)            | 1.63 (0.99-2.7)      | 2.03 (0.33-12.34) | 8.20E-01                         | 1.53E-01         | 8.65E-01   |
| rs4665775  | POMC          | 2   | 25,260,625  | 0.21             | Add                        | 0.75 (0.48-1.18)           | 1.45 (0.81-2.59)     | 2.04 (0.93-4.48)  | 4.66E-01                         | 4.06E-01         | 8.65E-01   |
| rs2871047  | COMT          | 22  | 18,306,331  | 0.06             | Add                        | 1.83 (0.95-3.53)           | 1.68 (1-2.83)        | 1.3 (0.38-4.47)   | 7.02E-01                         | 2.11E-01         | 8.67E-01   |
| rs806374   | CNR1          | 6   | 88,914,039  | 0.35             | Add                        | 1.01 (0.7-1.45)            | 2.85 (1.39-5.85)     | 1.32 (0.78-2.24)  | 4.08E-02                         | 1.20E-01         | 8.67E-01   |
| rs578776   | CHRNA3;CHRNA5 | 15  | 76,675,455  | 0.21             | Add                        | 1.01 (0.65-1.56)           | 1.9 (1.03-3.52)      | 1.39 (0.69-2.78)  | 4.81E-01                         | 7.79E-01         | 8.69E-01   |
| rs6413429  | SLC6A3        | 5   | 1,500,027   | 0.06             | Add                        | 0.44 (0.17-1.09)           | 1.63 (0.99-2.69)     | 2.09 (0.34-12.71) | 7.93E-01                         | 1.52E-01         | 8.69E-01   |
| rs887199   | COMT          | 22  | 18,341,955  | 0.15             | Dom                        | 1.56 (0.93-2.62)           | 1.9 (1.05-3.43)      | 1.26 (0.54-2.95)  | 4.36E-01                         | 2.06E-01         | 8.69E-01   |
| rs1150143  | NR4A2         | 2   | 156,885,862 | 0.34             | Dom                        | 1.07 (0.66-1.74)           | 1.08 (0.52-2.24)     | 2.29 (1.2-4.38)   | 1.30E-01                         | 2.85E-01         | 8.71E-01   |
| rs732215   | DDC           | 7   | 50,511,557  | 0.45             | Dom                        | 0.83 (0.49-1.41)           | 3.23 (1.3-8.05)      | 1.25 (0.7-2.23)   | 8.56E-02                         | 1.29E-01         | 8.71E-01   |
| rs17635123 | DDC           | 7   | 50,543,469  | 0.12             | Dom                        | 1.6 (0.92-2.77)            | 1.5 (0.86-2.64)      | 2.61 (1.01-6.75)  | 3.27E-01                         | 1.52E-01         | 8.72E-01   |
| rs6454672  | CNR1          | 6   | 88,918,289  | 0.14             | Dom                        | 0.74 (0.42-1.31)           | 2.06 (1.18-3.61)     | 0.8 (0.29-2.19)   | 1.08E-01                         | 1.45E-01         | 8.72E-01   |
| rs4602840  | DDC           | 7   | 50,530,315  | 0.13             | Dom                        | 1.6 (0.92-2.77)            | 1.5 (0.86-2.64)      | 2.61 (1.01-6.75)  | 3.27E-01                         | 1.52E-01         | 8.73E-01   |
| rs2273504  | CHRNA4        | 20  | 61,458,505  | 0.15             | Add                        | 0.78 (0.46-1.32)           | 2.05 (1.16-3.6)      | 1.11 (0.44-2.83)  | 2.61E-01                         | 2.54E-01         | 8.73E-01   |
| rs8081778  | GRB2          | 17  | 70,823,867  | 0.19             | Add                        | 0.83 (0.54-1.3)            | 1.54 (0.86-2.75)     | 1.86 (0.88-3.94)  | 6.77E-01                         | 6.89E-01         | 8.73E-01   |
| rs12441998 | CHRNA4        | 15  | 76,716,427  | 0.17             | Dom                        | 1.12 (0.67-1.88)           | 1.98 (1.09-3.58)     | 1.18 (0.5-2.76)   | 3.29E-01                         | 5.72E-01         | 8.74E-01   |
| rs2471005  | DRD1          | 5   | 174,814,813 | 0.39             | Add                        | 0.8 (0.57-1.14)            | 1.13 (0.58-2.22)     | 1.99 (1.15-3.44)  | 1.14E-01                         | 1.61E-01         | 8.74E-01   |
| rs4975646  | SLC6A3        | 5   | 1,486,401   | 0.36             | Dom                        | 1.15 (0.7-1.88)            | 0.93 (0.43-2.04)     | 2.35 (1.26-4.4)   | 7.07E-02                         | 1.50E-01         | 8.77E-01   |
| rs9607272  | MAPK1         | 22  | 20,466,398  | 0.25             | Dom                        | 1.02 (0.63-1.66)           | 2.35 (1.21-4.56)     | 1.09 (0.53-2.23)  | 1.24E-01                         | 3.03E-01         | 8.77E-01   |
| rs3777457  | EPB41L2       | 6   | 131,291,580 | 0.17             | Dom                        | 0.98 (0.59-1.65)           | 2.23 (1.23-4.01)     | 0.87 (0.37-2.06)  | 7.82E-02                         | 2.07E-01         | 8.78E-01   |
| rs2896135  | CALM1         | 14  | 89,950,493  | 0.42             | Add                        | 1.32 (0.94-1.84)           | 1.98 (0.89-4.4)      | 1.67 (1.03-2.72)  | 6.22E-01                         | 2.64E-01         | 8.78E-01   |
| rs2044859  | DDC           | 7   | 50,580,056  | 0.35             | Add                        | 1.38 (0.96-1.99)           | 2.08 (0.98-4.44)     | 1.56 (0.94-2.59)  | 4.39E-01                         | 1.95E-01         | 8.78E-01   |
| rs1874228  | PPP1R1B       | 17  | 35,028,800  | 0.27             | Dom                        | 0.78 (0.48-1.28)           | 1.97 (1.02-3.77)     | 1.42 (0.68-2.97)  | 5.19E-01                         | 4.50E-01         | 8.78E-01   |
| rs165599   | COMT          | 22  | 18,336,781  | 0.32             | Add                        | 1.39 (0.97-1.99)           | 1.75 (0.86-3.58)     | 1.77 (1.05-2.98)  | 9.83E-01                         | 1.95E-01         | 8.79E-01   |
| rs12528626 | EPB41L2       | 6   | 131,291,090 | 0.09             | Add                        | 0.76 (0.4-1.47)            | 1.97 (1.16-3.33)     | 0.65 (0.19-2.14)  | 9.15E-02                         | 1.83E-01         | 8.79E-01   |

**Supplemental Table 2: SNP-Specific Results for Abstinence Rates at 6-Month Follow-up**

| SNP        | Gene          | Chr | Position    | MAF <sup>a</sup> | Genetic Model <sup>b</sup> | SNP Odds Ratio<br>(95% CI) | Treatment Odds Ratio |                  | Test of Interaction <sup>c</sup> | LRT <sup>d</sup> |            |
|------------|---------------|-----|-------------|------------------|----------------------------|----------------------------|----------------------|------------------|----------------------------------|------------------|------------|
|            |               |     |             |                  |                            |                            | WT (95% CI)          | Variant (95% CI) |                                  | Observed P       | Adjusted P |
| rs165815   | COMT          | 22  | 18,339,473  | 0.15             | Dom                        | 1.52 (0.9-2.54)            | 1.9 (1.05-3.43)      | 1.26 (0.54-2.94) | 4.38E-01                         | 2.44E-01         | 8.84E-01   |
| rs265977   | DRD1          | 5   | 174,795,863 | 0.17             | Dom                        | 0.6 (0.34-1.06)            | 1.58 (0.91-2.74)     | 2.17 (0.78-6.05) | 5.91E-01                         | 1.92E-01         | 8.84E-01   |
| rs2273505  | CHRNA4        | 20  | 61,461,322  | 0.07             | Dom                        | 0.8 (0.38-1.69)            | 2.02 (1.17-3.5)      | 0.62 (0.16-2.43) | 1.15E-01                         | 2.52E-01         | 8.87E-01   |
| rs4646316  | COMT          | 22  | 18,332,132  | 0.21             | Add                        | 1.37 (0.91-2.07)           | 1.55 (0.84-2.89)     | 1.68 (0.87-3.24) | 8.52E-01                         | 3.11E-01         | 8.87E-01   |
| rs1150144  | NR4A2         | 2   | 156,886,749 | 0.31             | Dom                        | 1.1 (0.68-1.78)            | 1.14 (0.57-2.31)     | 2.29 (1.17-4.47) | 1.61E-01                         | 3.18E-01         | 8.87E-01   |
| rs7045735  | FREQ (NCS1)   | 9   | 132,004,454 | 0.40             | Dom                        | 1.14 (0.65-2.01)           | 4.08 (1.54-10.8)     | 1.13 (0.62-2.08) | 2.90E-02                         | 7.59E-02         | 8.89E-01   |
| rs2266999  | GNAZ          | 22  | 21,781,775  | 0.28             | Add                        | 1.38 (0.97-1.98)           | 1.69 (0.88-3.26)     | 1.56 (0.89-2.73) | 8.24E-01                         | 2.09E-01         | 8.89E-01   |
| rs1316971  | CHRNB4        | 15  | 76,717,565  | 0.17             | Add                        | 1.11 (0.66-1.86)           | 1.87 (1.05-3.34)     | 1.4 (0.67-2.91)  | 3.52E-01                         | 6.07E-01         | 8.90E-01   |
| rs4522666  | CHRNA4        | 20  | 61,444,924  | 0.36             | Dom                        | 1.07 (0.66-1.75)           | 1.02 (0.47-2.21)     | 2.27 (1.22-4.22) | 1.15E-01                         | 2.55E-01         | 8.90E-01   |
| rs2753268  | KCNJ9         | 1   | 158,324,876 | 0.31             | Dom                        | 0.87 (0.54-1.41)           | 2.25 (1.1-4.6)       | 1.25 (0.64-2.42) | 2.36E-01                         | 3.82E-01         | 8.90E-01   |
| rs265981   | DRD1          | 5   | 174,803,508 | 0.41             | Dom                        | 0.83 (0.5-1.37)            | 0.96 (0.45-2.06)     | 2.12 (1.07-4.18) | 1.28E-01                         | 2.51E-01         | 8.91E-01   |
| rs943551   | NTRK1         | 1   | 155,122,121 | 0.07             | Dom                        | 1.51 (0.78-2.9)            | 1.8 (1.06-3.05)      | 1.14 (0.34-3.8)  | 5.00E-01                         | 4.01E-01         | 8.93E-01   |
| rs3822095  | SNCA          | 4   | 90,955,540  | 0.37             | Add                        | 0.9 (0.62-1.3)             | 1.83 (0.89-3.79)     | 1.62 (0.96-2.73) | 7.40E-01                         | 7.65E-01         | 8.94E-01   |
| rs5751579  | GNAZ          | 22  | 21,759,224  | 0.27             | Add                        | 1.59 (0.98-2.56)           | 1.72 (0.9-3.32)      | 1.55 (0.89-2.71) | 6.25E-01                         | 1.64E-01         | 8.94E-01   |
| rs9867325  | NCK1          | 3   | 138,101,599 | 0.23             | Add                        | 0.97 (0.65-1.46)           | 1.46 (0.8-2.66)      | 1.94 (0.99-3.78) | 4.95E-01                         | 7.89E-01         | 8.95E-01   |
| rs2196128  | CHRNA6        | 8   | 42,737,443  | 0.21             | Add                        | 0.77 (0.49-1.2)            | 1.56 (0.87-2.81)     | 1.75 (0.83-3.67) | 8.04E-01                         | 4.97E-01         | 8.95E-01   |
| rs7219     | GRB2          | 17  | 70,826,963  | 0.27             | Dom                        | 0.8 (0.5-1.29)             | 1.71 (0.89-3.29)     | 1.57 (0.77-3.22) | 8.68E-01                         | 6.37E-01         | 8.97E-01   |
| rs943552   | NTRK1         | 1   | 155,122,242 | 0.07             | Dom                        | 1.5 (0.78-2.89)            | 1.78 (1.05-3.03)     | 1.14 (0.34-3.81) | 5.08E-01                         | 4.08E-01         | 8.98E-01   |
| rs203277   | EPB41         | 1   | 29,107,918  | 0.29             | Dom                        | 1.53 (0.94-2.47)           | 1.61 (0.78-3.31)     | 1.78 (0.93-3.4)  | 8.43E-01                         | 2.06E-01         | 9.00E-01   |
| rs1310277  | DRD1          | 5   | 174,786,176 | 0.13             | Dom                        | 0.84 (0.48-1.48)           | 2.04 (1.17-3.57)     | 0.86 (0.32-2.29) | 1.31E-01                         | 2.50E-01         | 9.00E-01   |
| rs10743149 | TH            | 11  | 2,150,751   | 0.14             | Add                        | 1.16 (0.72-1.88)           | 1.65 (0.94-2.9)      | 1.64 (0.72-3.76) | 9.87E-01                         | 8.24E-01         | 9.01E-01   |
| rs4603829  | CHRNA4        | 20  | 61,439,336  | 0.36             | Add                        | 1.02 (0.72-1.45)           | 1.49 (0.74-3)        | 1.73 (1.03-2.92) | 6.77E-01                         | 9.01E-01         | 9.01E-01   |
| rs2762682  | EPB41         | 1   | 29,182,405  | 0.29             | Dom                        | 1.53 (0.94-2.47)           | 1.61 (0.78-3.31)     | 1.78 (0.93-3.4)  | 8.43E-01                         | 2.06E-01         | 9.01E-01   |
| rs2985344  | EPB41         | 1   | 29,176,902  | 0.29             | Dom                        | 1.53 (0.94-2.47)           | 1.61 (0.78-3.31)     | 1.78 (0.93-3.4)  | 8.43E-01                         | 2.06E-01         | 9.01E-01   |
| rs150085   | EPB41         | 1   | 29,120,374  | 0.29             | Dom                        | 1.53 (0.94-2.47)           | 1.61 (0.78-3.31)     | 1.78 (0.93-3.4)  | 8.43E-01                         | 2.06E-01         | 9.01E-01   |
| rs2453737  | DRD1          | 5   | 174,791,508 | 0.39             | Dom                        | 1.32 (0.95-1.83)           | 1.52 (0.66-3.47)     | 1.77 (0.98-3.2)  | 6.45E-01                         | 2.11E-01         | 9.02E-01   |
| rs7281040  | CLIC6         | 21  | 34,978,271  | 0.20             | Add                        | 0.88 (0.58-1.35)           | 1.72 (0.96-3.09)     | 1.55 (0.76-3.17) | 8.14E-01                         | 8.05E-01         | 9.02E-01   |
| rs7017612  | CHRNA6;CHRNB3 | 8   | 42,718,402  | 0.20             | Dom                        | 0.87 (0.52-1.46)           | 1.4 (0.77-2.53)      | 2.44 (1.03-5.8)  | 3.00E-01                         | 5.44E-01         | 9.03E-01   |
| rs2069459  | CDK5          | 7   | 150,382,523 | 0.38             | Add                        | 0.9 (0.63-1.3)             | 1.47 (0.72-2.99)     | 1.77 (1.04-3.01) | 6.23E-01                         | 7.76E-01         | 9.03E-01   |
| rs2644596  | NTRK1         | 1   | 155,118,938 | 0.20             | Add                        | 1.06 (0.7-1.62)            | 1.79 (0.98-3.28)     | 1.51 (0.76-3.01) | 7.00E-01                         | 9.04E-01         | 9.04E-01   |
| rs13710    | FREQ (NCS1)   | 9   | 132,037,596 | 0.29             | Add                        | 1.23 (0.85-1.8)            | 2.67 (1.34-5.32)     | 1.24 (0.71-2.16) | 4.64E-02                         | 8.66E-02         | 9.04E-01   |
| rs834829   | NR4A2         | 2   | 156,909,095 | 0.31             | Dom                        | 1.2 (0.74-1.94)            | 1.21 (0.6-2.47)      | 2.16 (1.12-4.17) | 2.45E-01                         | 3.45E-01         | 9.04E-01   |
| rs936461   | DRD4          | 11  | 626,496     | 0.35             | Dom                        | 1.4 (0.83-2.35)            | 2.64 (1.11-6.25)     | 1.34 (0.73-2.46) | 2.10E-01                         | 2.39E-01         | 9.06E-01   |
| rs2076371  | PRKCABP       | 22  | 36,804,642  | 0.29             | Add                        | 1.02 (0.63-1.65)           | 1.84 (0.95-3.59)     | 1.55 (0.88-2.74) | 4.97E-01                         | 7.93E-01         | 9.06E-01   |
| rs9610470  | MAPK1         | 22  | 20,539,139  | 0.26             | Dom                        | 0.94 (0.58-1.52)           | 2.28 (1.17-4.45)     | 1.13 (0.56-2.31) | 1.61E-01                         | 3.40E-01         | 9.07E-01   |
| rs11043003 | TH            | 11  | 2,159,730   | 0.26             | Dom                        | 1.3 (0.8-2.1)              | 1.24 (0.64-2.37)     | 2.35 (1.14-4.86) | 1.99E-01                         | 2.01E-01         | 9.07E-01   |
| rs11042978 | TH            | 11  | 2,154,994   | 0.48             | Dom                        | 1.72 (0.94-3.16)           | 2.47 (0.81-7.51)     | 1.52 (0.89-2.62) | 4.46E-01                         | 1.72E-01         | 9.09E-01   |
| rs10276473 | DDC           | 7   | 50,580,491  | 0.21             | Add                        | 1.38 (0.93-2.06)           | 2.06 (1.11-3.84)     | 1.3 (0.69-2.45)  | 2.59E-01                         | 1.79E-01         | 9.09E-01   |
| rs7356228  | SNCA          | 4   | 90,962,878  | 0.37             | Add                        | 0.9 (0.62-1.3)             | 1.82 (0.88-3.75)     | 1.61 (0.96-2.72) | 7.56E-01                         | 7.64E-01         | 9.10E-01   |

**Supplemental Table 2: SNP-Specific Results for Abstinence Rates at 6-Month Follow-up**

| SNP        | Gene        | Chr | Position    | MAF <sup>a</sup> | Genetic Model <sup>b</sup> | SNP Odds Ratio<br>(95% CI) | Treatment Odds Ratio |                  | Test of Interaction <sup>c</sup> | LRT <sup>d</sup> |            |
|------------|-------------|-----|-------------|------------------|----------------------------|----------------------------|----------------------|------------------|----------------------------------|------------------|------------|
|            |             |     |             |                  |                            |                            | WT (95% CI)          | Variant (95% CI) |                                  | Observed P       | Adjusted P |
| rs6466157  | PRKAR2B     | 7   | 106,519,537 | 0.48             | Add                        | 0.87 (0.62-1.22)           | 2.93 (1.31-6.56)     | 1.62 (1-2.63)    | 8.98E-02                         | 1.56E-01         | 9.11E-01   |
| rs11749035 | DRD1        | 5   | 174,815,658 | 0.16             | Add                        | 1.24 (0.79-1.95)           | 2.11 (1.17-3.8)      | 1.06 (0.5-2.24)  | 1.35E-01                         | 2.35E-01         | 9.12E-01   |
| rs12944712 | CRHR1       | 17  | 41,226,918  | 0.41             | Dom                        | 1.12 (0.68-1.85)           | 1 (0.44-2.25)        | 2.19 (1.2-4)     | 1.26E-01                         | 2.56E-01         | 9.14E-01   |
| rs11749676 | DRD1        | 5   | 174,798,904 | 0.41             | Dom                        | 0.79 (0.49-1.3)            | 1.13 (0.54-2.36)     | 2.24 (1.17-4.3)  | 1.72E-01                         | 2.83E-01         | 9.15E-01   |
| rs11575383 | DDC         | 7   | 50,535,184  | 0.07             | Add                        | 0.91 (0.46-1.82)           | 1.71 (1.02-2.87)     | 1.37 (0.38-5)    | 7.58E-01                         | 9.15E-01         | 9.15E-01   |
| rs242944   | CRHR1       | 17  | 41,278,960  | 0.43             | Add                        | 1.08 (0.77-1.52)           | 2.71 (1.23-5.98)     | 1.57 (0.96-2.57) | 1.19E-01                         | 2.79E-01         | 9.16E-01   |
| rs3807552  | DDC         | 7   | 50,578,236  | 0.19             | Dom                        | 1.56 (0.93-2.61)           | 1.74 (0.89-3.39)     | 1.33 (0.6-2.95)  | 6.14E-01                         | 2.32E-01         | 9.17E-01   |
| rs11723579 | TDO2        | 4   | 157,057,151 | 0.48             | Dom                        | 0.72 (0.42-1.21)           | 2 (0.82-4.86)        | 1.53 (0.86-2.72) | 6.22E-01                         | 3.71E-01         | 9.17E-01   |
| rs3787138  | CHRNA4      | 20  | 61,449,668  | 0.13             | Add                        | 1.12 (0.65-1.93)           | 2.05 (1.12-3.72)     | 1.29 (0.51-3.28) | 3.96E-01                         | 5.89E-01         | 9.17E-01   |
| rs2237652  | PRKAR2B     | 7   | 106,547,212 | 0.48             | Add                        | 0.86 (0.62-1.21)           | 2.9 (1.29-6.52)      | 1.62 (1-2.63)    | 9.62E-02                         | 1.61E-01         | 9.18E-01   |
| rs2975292  | SLC6A3      | 5   | 1,472,932   | 0.34             | Add                        | 0.96 (0.65-1.41)           | 2.21 (1.06-4.61)     | 1.52 (0.87-2.65) | 3.45E-01                         | 6.04E-01         | 9.20E-01   |
| rs4788891  | GRB2        | 17  | 70,902,740  | 0.19             | Dom                        | 0.8 (0.48-1.33)            | 1.5 (0.83-2.7)       | 1.98 (0.85-4.59) | 5.99E-01                         | 6.27E-01         | 9.20E-01   |
| rs11214613 | DRD2        | 11  | 112,840,469 | 0.09             | Add                        | 0.81 (0.42-1.6)            | 1.99 (1.17-3.37)     | 0.62 (0.18-2.14) | 8.39E-02                         | 1.97E-01         | 9.21E-01   |
| rs9635870  | ADCYAP1     | 18  | 890,765     | 0.29             | Dom                        | 0.66 (0.4-1.09)            | 1.31 (0.7-2.44)      | 2.31 (1.03-5.17) | 2.72E-01                         | 1.81E-01         | 9.21E-01   |
| rs7633291  | DRD3        | 3   | 115,369,758 | 0.20             | Add                        | 1.19 (0.8-1.78)            | 1.78 (0.98-3.25)     | 1.5 (0.78-2.91)  | 6.73E-01                         | 6.49E-01         | 9.23E-01   |
| rs7290221  | COMT        | 22  | 18,322,680  | 0.48             | Dom                        | 1.02 (0.6-1.74)            | 0.87 (0.35-2.17)     | 2.1 (1.19-3.72)  | 1.08E-01                         | 2.69E-01         | 9.25E-01   |
| rs4809538  | CHRNA4      | 20  | 61,440,620  | 0.21             | Add                        | 0.87 (0.57-1.33)           | 1.97 (1.09-3.58)     | 1.29 (0.65-2.55) | 3.15E-01                         | 4.84E-01         | 9.25E-01   |
| rs2409531  | CLIC6       | 21  | 34,975,371  | 0.21             | Add                        | 0.88 (0.57-1.34)           | 1.72 (0.96-3.09)     | 1.57 (0.77-3.21) | 8.37E-01                         | 7.98E-01         | 9.25E-01   |
| rs7281533  | CLIC6       | 21  | 34,969,460  | 0.21             | Add                        | 0.88 (0.57-1.34)           | 1.72 (0.96-3.09)     | 1.57 (0.77-3.21) | 8.37E-01                         | 7.98E-01         | 9.25E-01   |
| rs458334   | SLC6A3      | 5   | 1,483,093   | 0.42             | Add                        | 0.74 (0.52-1.06)           | 2.05 (0.98-4.3)      | 1.56 (0.94-2.6)  | 4.61E-01                         | 1.49E-01         | 9.25E-01   |
| rs3213718  | CALM1       | 14  | 89,939,666  | 0.44             | Dom                        | 1.35 (0.77-2.36)           | 2.84 (1.06-7.62)     | 1.41 (0.8-2.48)  | 2.27E-01                         | 3.41E-01         | 9.26E-01   |
| rs7524405  | HCRTR1      | 1   | 31,881,166  | 0.41             | Dom                        | 0.75 (0.46-1.23)           | 1.55 (0.71-3.38)     | 1.74 (0.94-3.21) | 8.22E-01                         | 5.24E-01         | 9.26E-01   |
| rs204060   | EPB41       | 1   | 29,152,213  | 0.28             | Add                        | 1.34 (0.94-1.92)           | 1.56 (0.8-3.02)      | 1.79 (1.03-3.11) | 7.03E-01                         | 2.36E-01         | 9.26E-01   |
| rs6856558  | TDO2        | 4   | 157,059,403 | 0.39             | Add                        | 1.1 (0.79-1.53)            | 1.87 (0.9-3.9)       | 1.63 (0.99-2.67) | 6.79E-01                         | 8.05E-01         | 9.26E-01   |
| rs2076372  | PRKCABP     | 22  | 36,804,911  | 0.26             | Dom                        | 0.9 (0.55-1.46)            | 1.19 (0.63-2.23)     | 2.68 (1.25-5.73) | 1.06E-01                         | 2.58E-01         | 9.27E-01   |
| rs11746641 | DRD1        | 5   | 174,798,697 | 0.16             | Add                        | 1.23 (0.78-1.93)           | 2.07 (1.15-3.73)     | 1.11 (0.52-2.37) | 1.85E-01                         | 3.05E-01         | 9.27E-01   |
| rs356164   | SNCA        | 4   | 90,912,499  | 0.16             | Dom                        | 1.24 (0.75-2.08)           | 2.13 (1.18-3.88)     | 0.99 (0.43-2.31) | 1.47E-01                         | 2.70E-01         | 9.27E-01   |
| rs2271933  | HCRTR1      | 1   | 31,865,112  | 0.43             | Add                        | 0.71 (0.43-1.17)           | 1.53 (0.73-3.19)     | 1.79 (1.07-2.98) | 6.71E-01                         | 4.00E-01         | 9.27E-01   |
| rs9444584  | CNR1        | 6   | 88,919,278  | 0.22             | Add                        | 1.22 (0.83-1.79)           | 2.27 (1.22-4.22)     | 1.2 (0.64-2.25)  | 1.08E-01                         | 1.78E-01         | 9.27E-01   |
| rs6957586  | PRKAR2B     | 7   | 106,489,869 | 0.33             | Dom                        | 1.18 (0.72-1.91)           | 1.04 (0.5-2.17)      | 2.34 (1.23-4.44) | 1.04E-01                         | 1.83E-01         | 9.28E-01   |
| rs6703093  | HCRTR1      | 1   | 31,866,148  | 0.49             | Dom                        | 0.94 (0.55-1.61)           | 1 (0.4-2.48)         | 2.03 (1.14-3.62) | 1.98E-01                         | 4.30E-01         | 9.28E-01   |
| rs11575553 | DDC         | 7   | 50,493,713  | 0.11             | Dom                        | 1.36 (0.76-2.44)           | 1.42 (0.82-2.44)     | 3.16 (1.1-9.07)  | 1.87E-01                         | 2.15E-01         | 9.30E-01   |
| rs12027267 | EPB41       | 1   | 29,251,462  | 0.39             | Add                        | 0.72 (0.51-1.03)           | 1.6 (0.8-3.21)       | 1.64 (0.97-2.78) | 9.53E-01                         | 1.79E-01         | 9.30E-01   |
| rs1009502  | FREQ (NCS1) | 9   | 131,996,050 | 0.32             | Add                        | 1 (0.7-1.43)               | 2.79 (1.4-5.57)      | 1.37 (0.79-2.39) | 4.79E-02                         | 1.38E-01         | 9.31E-01   |
| rs12401728 | KCNJ9       | 1   | 158,328,583 | 0.21             | Dom                        | 1.06 (0.64-1.73)           | 1.77 (0.96-3.29)     | 1.5 (0.69-3.25)  | 7.37E-01                         | 9.31E-01         | 9.31E-01   |
| rs242924   | CRHR1       | 17  | 41,241,147  | 0.44             | Dom                        | 0.7 (0.43-1.16)            | 1.33 (0.6-2.95)      | 1.93 (1.05-3.57) | 4.64E-01                         | 3.22E-01         | 9.31E-01   |
| rs10853372 | ADCYAP1     | 18  | 913,261     | 0.41             | Dom                        | 1.39 (0.78-2.49)           | 3.51 (1.24-9.97)     | 1.32 (0.75-2.32) | 1.05E-01                         | 1.91E-01         | 9.31E-01   |
| rs3779078  | DDC         | 7   | 50,578,412  | 0.20             | Dom                        | 1.42 (0.88-2.31)           | 2.1 (1.11-3.95)      | 1.15 (0.54-2.44) | 2.32E-01                         | 2.17E-01         | 9.32E-01   |
| rs1817074  | DDC         | 7   | 50,541,506  | 0.37             | Dom                        | 1.44 (0.87-2.38)           | 1.31 (0.58-2.98)     | 1.99 (1.09-3.61) | 4.21E-01                         | 2.01E-01         | 9.33E-01   |

**Supplemental Table 2: SNP-Specific Results for Abstinence Rates at 6-Month Follow-up**

| SNP        | Gene    | Chr | Position    | MAF <sup>a</sup> | Genetic Model <sup>b</sup> | SNP Odds Ratio<br>(95% CI) | Treatment Odds Ratio |                  | Test of Interaction <sup>c</sup> | LRT <sup>d</sup> |            |
|------------|---------|-----|-------------|------------------|----------------------------|----------------------------|----------------------|------------------|----------------------------------|------------------|------------|
|            |         |     |             |                  |                            |                            | WT (95% CI)          | Variant (95% CI) |                                  | Observed P       | Adjusted P |
| rs2652510  | SLC6A3  | 5   | 1,500,860   | 0.40             | Add                        | 1.17 (0.83-1.66)           | 2.84 (1.3-6.18)      | 1.53 (0.93-2.53) | 8.13E-02                         | 1.61E-01         | 9.33E-01   |
| rs2292537  | TDO2    | 4   | 157,058,912 | 0.09             | Dom                        | 1.34 (0.74-2.46)           | 1.64 (0.96-2.8)      | 1.59 (0.53-4.8)  | 9.65E-01                         | 6.25E-01         | 9.33E-01   |
| rs3787137  | CHRNA4  | 20  | 61,449,544  | 0.41             | Add                        | 0.98 (0.68-1.43)           | 2.59 (1.14-5.87)     | 1.55 (0.92-2.6)  | 1.83E-01                         | 3.83E-01         | 9.33E-01   |
| rs1916610  | ADCYAP1 | 18  | 882,847     | 0.47             | Add                        | 1.36 (0.96-1.93)           | 2.25 (0.93-5.43)     | 1.71 (1.05-2.78) | 4.46E-01                         | 1.82E-01         | 9.34E-01   |
| rs12527605 | EPB41L2 | 6   | 131,326,069 | 0.09             | Add                        | 0.78 (0.41-1.5)            | 1.93 (1.14-3.27)     | 0.68 (0.2-2.26)  | 1.14E-01                         | 2.31E-01         | 9.34E-01   |
| rs4511641  | FOSB    | 19  | 50,685,408  | 0.44             | Dom                        | 1.07 (0.64-1.79)           | 1.18 (0.5-2.81)      | 1.94 (1.08-3.46) | 3.53E-01                         | 6.03E-01         | 9.35E-01   |
| rs4140535  | HTR1B   | 6   | 78,231,771  | 0.37             | Dom                        | 0.73 (0.45-1.19)           | 2.34 (1.11-4.94)     | 1.27 (0.67-2.4)  | 2.23E-01                         | 1.65E-01         | 9.35E-01   |
| rs4809549  | CHRNA4  | 20  | 61,472,553  | 0.46             | Add                        | 0.86 (0.61-1.21)           | 2.42 (1.1-5.35)      | 1.63 (0.99-2.66) | 2.58E-01                         | 3.22E-01         | 9.35E-01   |
| rs904952   | CHRNA7  | 15  | 30,206,037  | 0.48             | Dom                        | 0.97 (0.57-1.67)           | 0.72 (0.29-1.8)      | 2.32 (1.3-4.15)  | 3.50E-02                         | 1.06E-01         | 9.36E-01   |
| rs2876981  | MAPK1   | 22  | 20,535,611  | 0.40             | Dom                        | 0.72 (0.44-1.17)           | 1.42 (0.67-3)        | 1.84 (0.98-3.45) | 6.02E-01                         | 3.88E-01         | 9.36E-01   |
| rs12803    | NR4A2   | 2   | 156,890,171 | 0.47             | Add                        | 1.07 (0.77-1.49)           | 1.18 (0.53-2.63)     | 1.67 (1.03-2.72) | 3.11E-01                         | 5.11E-01         | 9.37E-01   |
| rs1561289  | POMC    | 2   | 25,222,544  | 0.25             | Add                        | 0.87 (0.58-1.32)           | 1.6 (0.86-2.98)      | 1.74 (0.9-3.35)  | 8.46E-01                         | 8.00E-01         | 9.37E-01   |
| rs10798880 | HCRTR1  | 1   | 31,869,675  | 0.41             | Add                        | 0.83 (0.58-1.18)           | 1.43 (0.69-2.97)     | 1.75 (1.05-2.92) | 5.88E-01                         | 5.50E-01         | 9.37E-01   |
| rs2118404  | POMC    | 2   | 25,230,833  | 0.24             | Add                        | 0.89 (0.59-1.34)           | 1.63 (0.88-3.03)     | 1.71 (0.89-3.28) | 9.13E-01                         | 8.45E-01         | 9.38E-01   |
| rs1063311  | MAPK1   | 22  | 20,446,467  | 0.44             | Add                        | 0.83 (0.6-1.17)            | 1.46 (0.7-3.06)      | 1.64 (1-2.7)     | 7.35E-01                         | 5.53E-01         | 9.38E-01   |
| rs2303928  | CDK5    | 7   | 150,370,263 | 0.40             | Add                        | 0.84 (0.59-1.19)           | 1.64 (0.8-3.34)      | 1.7 (1.01-2.86)  | 9.25E-01                         | 6.12E-01         | 9.38E-01   |
| rs907094   | PPP1R1B | 17  | 35,043,897  | 0.25             | Dom                        | 0.87 (0.53-1.41)           | 1.69 (0.9-3.18)      | 1.62 (0.77-3.42) | 9.29E-01                         | 8.40E-01         | 9.39E-01   |
| rs11246226 | DRD4    | 11  | 631,191     | 0.48             | Add                        | 0.8 (0.56-1.14)            | 2.06 (0.88-4.79)     | 1.71 (1.03-2.85) | 6.24E-01                         | 3.86E-01         | 9.40E-01   |
| rs9282821  | OPRM1   | 6   | 154,456,068 | 0.43             | Dom                        | 0.74 (0.53-1.05)           | 2.15 (0.98-4.73)     | 1.46 (0.79-2.68) | 5.12E-01                         | 1.64E-01         | 9.41E-01   |
| rs835616   | DRD1    | 5   | 174,796,296 | 0.36             | Dom                        | 0.81 (0.5-1.31)            | 1.2 (0.58-2.46)      | 2.16 (1.12-4.15) | 2.36E-01                         | 3.84E-01         | 9.41E-01   |
| rs12885713 | CALM1   | 14  | 89,933,110  | 0.46             | Dom                        | 1.2 (0.68-2.1)             | 2.9 (1.07-7.83)      | 1.32 (0.75-2.34) | 1.80E-01                         | 3.73E-01         | 9.41E-01   |
| rs1049353  | CNR1    | 6   | 88,910,354  | 0.26             | Dom                        | 0.96 (0.59-1.55)           | 2.39 (1.24-4.62)     | 1.07 (0.53-2.19) | 1.05E-01                         | 2.49E-01         | 9.42E-01   |
| rs7175359  | CHRNA7  | 15  | 30,212,239  | 0.48             | Dom                        | 0.97 (0.56-1.66)           | 0.72 (0.29-1.8)      | 2.3 (1.29-4.11)  | 3.66E-02                         | 1.10E-01         | 9.42E-01   |
| rs1213369  | HTR1B   | 6   | 78,234,976  | 0.43             | Dom                        | 0.64 (0.39-1.06)           | 1.98 (0.9-4.38)      | 1.52 (0.82-2.79) | 5.98E-01                         | 1.71E-01         | 9.42E-01   |
| rs4656876  | KCNJ9   | 1   | 158,317,016 | 0.48             | Add                        | 0.98 (0.7-1.37)            | 2.22 (0.98-5.02)     | 1.64 (1.01-2.66) | 3.84E-01                         | 6.61E-01         | 9.43E-01   |
| rs2737029  | SNCA    | 4   | 90,930,793  | 0.40             | Dom                        | 0.97 (0.59-1.6)            | 0.98 (0.44-2.17)     | 2.23 (1.21-4.11) | 1.07E-01                         | 2.73E-01         | 9.43E-01   |
| rs6494223  | CHRNA7  | 15  | 30,183,749  | 0.38             | Dom                        | 1.35 (0.81-2.24)           | 1.02 (0.45-2.31)     | 2.11 (1.15-3.87) | 1.62E-01                         | 1.65E-01         | 9.44E-01   |
| rs174696   | COMT    | 22  | 18,333,176  | 0.23             | Dom                        | 1.09 (0.67-1.76)           | 1.96 (1.04-3.68)     | 1.26 (0.59-2.66) | 3.74E-01                         | 6.58E-01         | 9.44E-01   |
| rs707127   | NR4A2   | 2   | 156,877,056 | 0.36             | Dom                        | 0.73 (0.45-1.17)           | 1.67 (0.82-3.4)      | 1.72 (0.89-3.31) | 9.55E-01                         | 4.25E-01         | 9.45E-01   |
| rs9912608  | GRB2    | 17  | 70,848,626  | 0.26             | Dom                        | 0.74 (0.46-1.2)            | 1.93 (1.01-3.69)     | 1.33 (0.64-2.78) | 4.55E-01                         | 3.23E-01         | 9.45E-01   |
| rs9350712  | HTR1B   | 6   | 78,220,836  | 0.46             | Dom                        | 0.85 (0.51-1.42)           | 1.61 (0.68-3.79)     | 1.68 (0.94-3.02) | 9.30E-01                         | 8.25E-01         | 9.46E-01   |
| rs174675   | COMT    | 22  | 18,314,051  | 0.28             | Dom                        | 0.95 (0.59-1.54)           | 1.56 (0.81-2.99)     | 1.8 (0.88-3.7)   | 7.73E-01                         | 9.46E-01         | 9.46E-01   |
| rs2271537  | TDO2    | 4   | 157,049,273 | 0.49             | Add                        | 1.24 (0.84-1.81)           | 1.23 (0.48-3.14)     | 1.5 (0.9-2.5)    | 6.16E-01                         | 4.67E-01         | 9.47E-01   |
| rs324026   | DRD3    | 3   | 115,373,732 | 0.34             | Add                        | 1.27 (0.89-1.82)           | 2.25 (1.09-4.67)     | 1.54 (0.92-2.59) | 2.98E-01                         | 2.59E-01         | 9.47E-01   |
| rs4074461  | CRHR1   | 17  | 41,210,922  | 0.46             | Add                        | 0.92 (0.65-1.3)            | 2.42 (1.1-5.36)      | 1.67 (1.03-2.73) | 2.94E-01                         | 4.75E-01         | 9.47E-01   |
| rs5751583  | GNAZ    | 22  | 21,764,327  | 0.06             | Dom                        | 0.9 (0.39-2.05)            | 1.92 (1.14-3.22)     | 0.49 (0.1-2.28)  | 9.98E-02                         | 2.40E-01         | 9.47E-01   |
| rs12206057 | EPB41L2 | 6   | 131,254,210 | 0.17             | Add                        | 0.95 (0.6-1.49)            | 2.12 (1.19-3.76)     | 1.02 (0.47-2.21) | 1.16E-01                         | 2.84E-01         | 9.47E-01   |
| rs806366   | CNR1    | 6   | 88,904,308  | 0.48             | Dom                        | 0.97 (0.56-1.66)           | 3.01 (1.18-7.68)     | 1.32 (0.75-2.31) | 1.38E-01                         | 3.05E-01         | 9.48E-01   |
| rs12038347 | EPB41   | 1   | 29,141,303  | 0.10             | Dom                        | 1.46 (0.82-2.59)           | 1.96 (1.13-3.4)      | 0.93 (0.34-2.57) | 2.09E-01                         | 2.31E-01         | 9.49E-01   |

**Supplemental Table 2: SNP-Specific Results for Abstinence Rates at 6-Month Follow-up**

| SNP        | Gene    | Chr | Position    | MAF <sup>a</sup> | Genetic Model <sup>b</sup> | SNP Odds Ratio<br>(95% CI) | Treatment Odds Ratio |                  | Test of Interaction <sup>c</sup> | LRT <sup>d</sup> |            |
|------------|---------|-----|-------------|------------------|----------------------------|----------------------------|----------------------|------------------|----------------------------------|------------------|------------|
|            |         |     |             |                  |                            |                            | WT (95% CI)          | Variant (95% CI) |                                  | Observed P       | Adjusted P |
| rs16837840 | EPB41   | 1   | 29,207,867  | 0.10             | Dom                        | 1.46 (0.82-2.59)           | 1.96 (1.13-3.4)      | 0.93 (0.34-2.57) | 2.09E-01                         | 2.31E-01         | 9.49E-01   |
| rs7546297  | HCRTR1  | 1   | 31,879,081  | 0.41             | Dom                        | 0.74 (0.45-1.21)           | 1.63 (0.75-3.54)     | 1.69 (0.91-3.14) | 9.46E-01                         | 4.95E-01         | 9.49E-01   |
| rs12527054 | HTR1B   | 6   | 78,220,647  | 0.07             | Add                        | 0.59 (0.29-1.22)           | 1.8 (1.08-2.99)      | 1.03 (0.26-4.05) | 4.51E-01                         | 2.22E-01         | 9.50E-01   |
| rs806378   | CNR1    | 6   | 88,916,270  | 0.28             | Add                        | 0.83 (0.56-1.22)           | 1.25 (0.68-2.31)     | 2.25 (1.19-4.27) | 1.41E-01                         | 2.34E-01         | 9.50E-01   |
| rs4963126  | DRD4    | 11  | 646,845     | 0.48             | Dom                        | 0.9 (0.64-1.27)            | 1.66 (0.67-4.1)      | 1.68 (0.95-2.97) | 7.77E-01                         | 8.30E-01         | 9.50E-01   |
| rs1486009  | DRD3    | 3   | 115,371,222 | 0.06             | Add                        | 0.86 (0.41-1.83)           | 1.79 (1.07-2.98)     | 0.88 (0.21-3.61) | 3.51E-01                         | 6.04E-01         | 9.51E-01   |
| rs3776511  | SLC6A3  | 5   | 1,460,129   | 0.21             | Dom                        | 1.59 (0.96-2.61)           | 1.99 (1.02-3.88)     | 1.42 (0.67-3.02) | 5.19E-01                         | 1.82E-01         | 9.51E-01   |
| rs10107450 | CHRNA6  | 8   | 42,749,052  | 0.22             | Add                        | 0.87 (0.58-1.32)           | 1.69 (0.93-3.08)     | 1.59 (0.81-3.13) | 8.80E-01                         | 7.94E-01         | 9.51E-01   |
| rs9610375  | MAPK1   | 22  | 20,517,093  | 0.49             | Dom                        | 0.71 (0.42-1.19)           | 1.4 (0.58-3.38)      | 1.84 (1.03-3.3)  | 6.15E-01                         | 4.15E-01         | 9.51E-01   |
| rs2283802  | GNAZ    | 22  | 21,784,722  | 0.26             | Dom                        | 1.46 (0.9-2.36)            | 1.73 (0.87-3.41)     | 1.43 (0.72-2.87) | 7.08E-01                         | 3.04E-01         | 9.52E-01   |
| rs4789170  | GRB2    | 17  | 70,844,389  | 0.26             | Dom                        | 0.74 (0.45-1.2)            | 1.89 (0.99-3.6)      | 1.35 (0.65-2.82) | 5.07E-01                         | 3.34E-01         | 9.52E-01   |
| rs11742274 | DRD1    | 5   | 174,792,103 | 0.19             | Dom                        | 1.08 (0.65-1.78)           | 1.56 (0.86-2.83)     | 1.91 (0.85-4.33) | 6.92E-01                         | 8.74E-01         | 9.52E-01   |
| rs968335   | HCRTR1  | 1   | 31,858,363  | 0.48             | Dom                        | 0.89 (0.52-1.51)           | 1.08 (0.44-2.65)     | 1.99 (1.11-3.54) | 2.66E-01                         | 5.05E-01         | 9.53E-01   |
| rs4867796  | DRD1    | 5   | 174,798,127 | 0.17             | Add                        | 1.27 (0.82-1.95)           | 1.98 (1.09-3.58)     | 1.22 (0.6-2.52)  | 2.85E-01                         | 3.77E-01         | 9.53E-01   |
| rs756632   | GNAZ    | 22  | 21,799,918  | 0.15             | Dom                        | 1.08 (0.62-1.88)           | 1.34 (0.76-2.38)     | 3.21 (1.22-8.48) | 1.31E-01                         | 2.60E-01         | 9.54E-01   |
| rs2040176  | ADCYAP1 | 18  | 882,467     | 0.12             | Dom                        | 0.61 (0.32-1.14)           | 1.68 (0.99-2.86)     | 1.71 (0.53-5.48) | 9.79E-01                         | 2.62E-01         | 9.54E-01   |
| rs10227616 | PRKAR2B | 7   | 106,462,434 | 0.33             | Dom                        | 1.17 (0.72-1.9)            | 1.07 (0.51-2.23)     | 2.31 (1.22-4.38) | 1.21E-01                         | 2.14E-01         | 9.55E-01   |
| rs356168   | SNCA    | 4   | 90,893,454  | 0.46             | Add                        | 1.11 (0.66-1.88)           | 1.08 (0.5-2.34)      | 1.75 (1.07-2.86) | 1.44E-01                         | 2.91E-01         | 9.55E-01   |
| rs599548   | OPRM1   | 6   | 154,460,254 | 0.14             | Add                        | 0.93 (0.54-1.58)           | 1.3 (0.75-2.24)      | 3.35 (1.26-8.9)  | 9.12E-02                         | 2.14E-01         | 9.55E-01   |
| rs806375   | CNR1    | 6   | 88,915,240  | 0.46             | Add                        | 0.79 (0.57-1.09)           | 1.47 (0.71-3.06)     | 1.69 (1.03-2.77) | 6.80E-01                         | 3.42E-01         | 9.55E-01   |
| rs12021667 | EPB41   | 1   | 29,183,661  | 0.39             | Add                        | 0.73 (0.52-1.04)           | 1.62 (0.81-3.24)     | 1.65 (0.97-2.8)  | 9.58E-01                         | 2.12E-01         | 9.56E-01   |
| rs16940646 | CRHR1   | 17  | 41,235,682  | 0.12             | Dom                        | 1.2 (0.68-2.13)            | 1.71 (0.98-2.96)     | 1.64 (0.59-4.56) | 9.50E-01                         | 8.22E-01         | 9.56E-01   |
| rs806365   | CNR1    | 6   | 88,902,668  | 0.46             | Dom                        | 0.78 (0.47-1.31)           | 0.94 (0.4-2.17)      | 2.14 (1.17-3.89) | 1.18E-01                         | 2.13E-01         | 9.56E-01   |
| rs1599789  | ADCYAP1 | 18  | 881,312     | 0.26             | Add                        | 0.72 (0.48-1.09)           | 1.72 (0.93-3.18)     | 1.67 (0.86-3.26) | 9.47E-01                         | 2.74E-01         | 9.56E-01   |
| rs2236196  | CHRNA4  | 20  | 61,448,000  | 0.27             | Dom                        | 1.28 (0.79-2.07)           | 1.67 (0.83-3.38)     | 1.76 (0.9-3.44)  | 9.18E-01                         | 5.85E-01         | 9.57E-01   |
| rs7766029  | CNR1    | 6   | 88,904,154  | 0.48             | Dom                        | 0.91 (0.53-1.57)           | 0.87 (0.35-2.18)     | 2.14 (1.2-3.82)  | 1.05E-01                         | 2.54E-01         | 9.57E-01   |
| rs1800879  | NTRK1   | 1   | 155,104,765 | 0.36             | Add                        | 0.77 (0.47-1.24)           | 2.12 (1.04-4.31)     | 1.52 (0.91-2.55) | 8.29E-01                         | 5.27E-01         | 9.57E-01   |
| rs7625282  | DRD3    | 3   | 115,364,217 | 0.25             | Add                        | 1.12 (0.77-1.63)           | 2.03 (1.07-3.85)     | 1.42 (0.79-2.56) | 3.49E-01                         | 5.54E-01         | 9.57E-01   |
| rs27074    | SLC6A3  | 5   | 1,436,550   | 0.11             | Add                        | 0.85 (0.48-1.51)           | 1.75 (1.02-3.01)     | 1.31 (0.47-3.66) | 6.18E-01                         | 7.28E-01         | 9.57E-01   |
| rs3789033  | CREBBP  | 16  | 3,779,536   | 0.24             | Dom                        | 0.88 (0.54-1.43)           | 1.6 (0.86-2.98)      | 1.73 (0.81-3.7)  | 8.71E-01                         | 8.72E-01         | 9.57E-01   |
| rs1528454  | NR4A2   | 2   | 156,877,951 | 0.30             | Add                        | 0.88 (0.54-1.41)           | 1.62 (0.85-3.08)     | 1.7 (0.95-3.01)  | 9.26E-01                         | 8.63E-01         | 9.57E-01   |
| rs356198   | SNCA    | 4   | 90,901,527  | 0.20             | Dom                        | 1.34 (0.82-2.18)           | 2.04 (1.09-3.84)     | 1.2 (0.56-2.57)  | 2.92E-01                         | 3.31E-01         | 9.58E-01   |
| rs7228988  | ADCYAP1 | 18  | 907,957     | 0.31             | Dom                        | 0.74 (0.46-1.2)            | 1.48 (0.77-2.87)     | 1.95 (0.96-3.97) | 5.84E-01                         | 4.33E-01         | 9.58E-01   |
| rs9298628  | CHRNA6  | 8   | 42,725,148  | 0.19             | Add                        | 0.84 (0.53-1.32)           | 1.59 (0.89-2.85)     | 1.64 (0.77-3.5)  | 9.46E-01                         | 7.38E-01         | 9.58E-01   |
| rs12600908 | GRB2    | 17  | 70,839,969  | 0.12             | Dom                        | 0.75 (0.42-1.37)           | 1.76 (1.03-3.02)     | 1.33 (0.46-3.89) | 6.52E-01                         | 5.47E-01         | 9.58E-01   |
| rs12608148 | ADCYAP1 | 18  | 879,159     | 0.27             | Dom                        | 0.82 (0.5-1.33)            | 1.23 (0.64-2.35)     | 2.35 (1.13-4.88) | 1.92E-01                         | 3.43E-01         | 9.59E-01   |
| rs11081411 | ADCYAP1 | 18  | 883,205     | 0.16             | Add                        | 0.77 (0.49-1.21)           | 1.61 (0.93-2.78)     | 1.82 (0.79-4.17) | 7.99E-01                         | 4.99E-01         | 9.59E-01   |
| rs880028   | DDC     | 7   | 50,537,630  | 0.21             | Dom                        | 1.18 (0.72-1.93)           | 1.31 (0.7-2.43)      | 2.7 (1.23-5.93)  | 1.56E-01                         | 2.56E-01         | 9.60E-01   |
| rs10840495 | TH      | 11  | 2,152,413   | 0.38             | Dom                        | 1.2 (0.71-2.04)            | 1.46 (0.63-3.37)     | 1.94 (1.01-3.73) | 6.04E-01                         | 6.66E-01         | 9.60E-01   |

**Supplemental Table 2: SNP-Specific Results for Abstinence Rates at 6-Month Follow-up**

| SNP        | Gene    | Chr | Position    | MAF <sup>a</sup> | Genetic Model <sup>b</sup> | SNP Odds Ratio (95% CI) | Treatment Odds Ratio |                   | Test of Interaction <sup>c</sup> | LRT <sup>d</sup> |            |
|------------|---------|-----|-------------|------------------|----------------------------|-------------------------|----------------------|-------------------|----------------------------------|------------------|------------|
|            |         |     |             |                  |                            |                         | WT (95% CI)          | Variant (95% CI)  |                                  | Observed P       | Adjusted P |
| rs242939   | CRHR1   | 17  | 41,251,360  | 0.09             | Add                        | 0.69 (0.34-1.41)        | 1.74 (1.04-2.9)      | 1.59 (0.4-6.32)   | 9.10E-01                         | 4.94E-01         | 9.61E-01   |
| rs2049045  | BDNF    | 11  | 27,650,817  | 0.18             | Add                        | 0.91 (0.57-1.45)        | 1.29 (0.73-2.29)     | 2.63 (1.19-5.79)  | 1.37E-01                         | 3.01E-01         | 9.61E-01   |
| rs4845652  | CHRN2   | 1   | 152,804,829 | 0.09             | Add                        | 1.08 (0.62-1.9)         | 1.68 (0.99-2.85)     | 1.6 (0.57-4.54)   | 9.39E-01                         | 9.61E-01         | 9.61E-01   |
| rs9306383  | GNAZ    | 22  | 21,751,058  | 0.43             | Dom                        | 0.94 (0.57-1.57)        | 1.82 (0.78-4.26)     | 1.72 (0.94-3.12)  | 9.08E-01                         | 9.61E-01         | 9.61E-01   |
| rs2070367  | CLIC6   | 21  | 35,001,362  | 0.20             | Dom                        | 0.72 (0.43-1.21)        | 1.92 (1.07-3.43)     | 1.23 (0.52-2.92)  | 4.04E-01                         | 2.81E-01         | 9.62E-01   |
| rs2267366  | PRKCABP | 22  | 36,810,605  | 0.16             | Add                        | 0.71 (0.44-1.17)        | 1.74 (1-3.04)        | 1.52 (0.64-3.61)  | 7.89E-01                         | 3.34E-01         | 9.62E-01   |
| rs324022   | DRD3    | 3   | 115,369,988 | 0.29             | Add                        | 1.28 (0.9-1.84)         | 2.04 (1.04-4)        | 1.52 (0.88-2.63)  | 4.20E-01                         | 2.93E-01         | 9.63E-01   |
| rs10485171 | CNR1    | 6   | 88,900,109  | 0.42             | Dom                        | 1.4 (0.83-2.38)         | 1.1 (0.45-2.67)      | 1.98 (1.11-3.52)  | 2.76E-01                         | 2.14E-01         | 9.63E-01   |
| rs167770   | DRD3    | 3   | 115,362,252 | 0.28             | Add                        | 1.26 (0.88-1.81)        | 2.08 (1.06-4.07)     | 1.48 (0.85-2.58)  | 3.57E-01                         | 2.95E-01         | 9.63E-01   |
| rs10915208 | EPB41   | 1   | 29,102,916  | 0.11             | Dom                        | 1.34 (0.77-2.34)        | 2 (1.14-3.49)        | 0.88 (0.33-2.34)  | 1.55E-01                         | 2.60E-01         | 9.63E-01   |
| rs7815010  | CHRNA2  | 8   | 27,386,013  | 0.25             | Add                        | 0.86 (0.52-1.43)        | 1.3 (0.71-2.38)      | 2.34 (1.16-4.71)  | 1.01E-01                         | 2.39E-01         | 9.66E-01   |
| rs4350602  | GRB2    | 17  | 70,867,364  | 0.31             | Dom                        | 0.87 (0.54-1.41)        | 2.1 (1.03-4.27)      | 1.31 (0.67-2.55)  | 3.42E-01                         | 4.94E-01         | 9.66E-01   |
| rs81189    | CRHR1   | 17  | 41,250,579  | 0.48             | Dom                        | 0.78 (0.46-1.32)        | 1.21 (0.51-2.9)      | 1.94 (1.08-3.48)  | 3.81E-01                         | 4.59E-01         | 9.66E-01   |
| rs11659736 | ADCYAP1 | 18  | 905,937     | 0.36             | Add                        | 0.81 (0.5-1.31)         | 1.44 (0.72-2.87)     | 1.78 (1.04-3.05)  | 9.99E-01                         | 6.82E-01         | 9.66E-01   |
| rs8192595  | ADCYAP1 | 18  | 897,521     | 0.09             | Add                        | 0.68 (0.33-1.41)        | 1.47 (0.87-2.46)     | 3.66 (0.9-14.8)   | 2.31E-01                         | 3.30E-01         | 9.67E-01   |
| rs2253206  | CREB1   | 2   | 208,100,223 | 0.48             | Add                        | 0.98 (0.71-1.37)        | 1.81 (0.81-4.04)     | 1.67 (1.03-2.71)  | 8.20E-01                         | 9.67E-01         | 9.67E-01   |
| rs10914453 | HCRTR1  | 1   | 31,847,623  | 0.40             | Dom                        | 0.83 (0.51-1.35)        | 1.68 (0.77-3.68)     | 1.65 (0.89-3.03)  | 9.66E-01                         | 7.48E-01         | 9.68E-01   |
| rs11663172 | ADCYAP1 | 18  | 910,173     | 0.39             | Dom                        | 0.69 (0.42-1.13)        | 1.92 (0.9-4.09)      | 1.56 (0.83-2.91)  | 6.77E-01                         | 2.86E-01         | 9.68E-01   |
| rs4798767  | ADCYAP1 | 18  | 917,475     | 0.41             | Dom                        | 1.27 (0.72-2.22)        | 2.79 (1.04-7.48)     | 1.4 (0.79-2.47)   | 2.36E-01                         | 4.15E-01         | 9.68E-01   |
| rs11238133 | DDC     | 7   | 50,510,408  | 0.32             | Add                        | 1.31 (0.92-1.86)        | 1.49 (0.74-3)        | 1.75 (1.03-2.98)  | 6.54E-01                         | 2.59E-01         | 9.69E-01   |
| rs8079197  | GRB2    | 17  | 70,828,274  | 0.27             | Add                        | 0.82 (0.55-1.21)        | 1.79 (0.95-3.37)     | 1.55 (0.84-2.88)  | 7.30E-01                         | 5.20E-01         | 9.69E-01   |
| rs12373400 | ADCYAP1 | 18  | 913,096     | 0.38             | Dom                        | 0.68 (0.42-1.11)        | 1.74 (0.83-3.67)     | 1.66 (0.88-3.14)  | 9.25E-01                         | 2.96E-01         | 9.69E-01   |
| rs10770140 | TH      | 11  | 2,150,173   | 0.40             | Dom                        | 1.26 (0.74-2.14)        | 1.67 (0.69-4.02)     | 1.76 (0.96-3.22)  | 9.24E-01                         | 6.84E-01         | 9.69E-01   |
| rs2100280  | DDC     | 7   | 50,548,330  | 0.25             | Add                        | 1.16 (0.78-1.72)        | 1.29 (0.68-2.44)     | 2.25 (1.2-4.2)    | 1.72E-01                         | 2.75E-01         | 9.69E-01   |
| rs6336     | NTRK1   | 1   | 155,115,542 | 0.07             | Add                        | 1.18 (0.6-2.32)         | 1.61 (0.96-2.7)      | 2.07 (0.59-7.27)  | 7.15E-01                         | 8.28E-01         | 9.70E-01   |
| rs2551923  | CREB1   | 2   | 208,150,021 | 0.18             | Dom                        | 1.27 (0.77-2.09)        | 1.69 (0.92-3.1)      | 1.6 (0.72-3.55)   | 9.14E-01                         | 6.45E-01         | 9.70E-01   |
| rs6494211  | CHRNA7  | 15  | 30,164,880  | 0.34             | Dom                        | 0.62 (0.38-1.01)        | 1.69 (0.86-3.32)     | 1.71 (0.85-3.41)  | 9.81E-01                         | 1.49E-01         | 9.70E-01   |
| rs10093964 | CHRNA2  | 8   | 27,367,957  | 0.43             | Add                        | 1.22 (0.88-1.7)         | 2.35 (1.06-5.19)     | 1.61 (0.99-2.61)  | 2.74E-01                         | 3.29E-01         | 9.71E-01   |
| rs2846583  | ADCYAP1 | 18  | 892,965     | 0.28             | Dom                        | 0.78 (0.48-1.26)        | 1.26 (0.66-2.41)     | 2.3 (1.11-4.77)   | 2.26E-01                         | 3.25E-01         | 9.71E-01   |
| rs324029   | DRD3    | 3   | 115,364,313 | 0.29             | Add                        | 1.25 (0.87-1.8)         | 2.1 (1.07-4.1)       | 1.49 (0.86-2.59)  | 3.56E-01                         | 3.13E-01         | 9.71E-01   |
| rs2734849  | ANKK1   | 11  | 112,775,370 | 0.49             | Add                        | 1.27 (0.91-1.77)        | 1.17 (0.5-2.73)      | 1.62 (1-2.64)     | 3.44E-01                         | 1.92E-01         | 9.72E-01   |
| rs4789189  | GRB2    | 17  | 70,909,580  | 0.20             | Dom                        | 0.76 (0.46-1.27)        | 1.51 (0.84-2.73)     | 1.99 (0.86-4.6)   | 6.01E-01                         | 5.28E-01         | 9.72E-01   |
| rs174697   | COMT    | 22  | 18,333,832  | 0.05             | Dom                        | 1.07 (0.47-2.42)        | 1.55 (0.93-2.57)     | 3.02 (0.63-14.56) | 4.28E-01                         | 7.04E-01         | 9.72E-01   |
| rs1476879  | PRKAR2B | 7   | 106,485,977 | 0.47             | Add                        | 0.97 (0.69-1.36)        | 1.74 (0.78-3.88)     | 1.66 (1.02-2.69)  | 8.89E-01                         | 9.72E-01         | 9.72E-01   |
| rs9908820  | GRB2    | 17  | 70,920,414  | 0.34             | Add                        | 0.86 (0.61-1.21)        | 2.07 (1.06-4.04)     | 1.47 (0.86-2.5)   | 3.33E-01                         | 3.67E-01         | 9.72E-01   |
| rs9909443  | GRB2    | 17  | 70,819,941  | 0.26             | Dom                        | 0.74 (0.46-1.2)         | 1.66 (0.88-3.12)     | 1.66 (0.79-3.51)  | 9.96E-01                         | 4.61E-01         | 9.73E-01   |
| rs17501755 | ADCYAP1 | 18  | 910,497     | 0.30             | Add                        | 0.79 (0.49-1.28)        | 1.51 (0.8-2.88)      | 1.82 (1-3.32)     | 7.98E-01                         | 6.23E-01         | 9.73E-01   |
| rs17501915 | ADCYAP1 | 18  | 915,250     | 0.30             | Add                        | 0.79 (0.49-1.28)        | 1.51 (0.8-2.88)      | 1.82 (1-3.32)     | 7.98E-01                         | 6.23E-01         | 9.73E-01   |
| rs3773678  | DRD3    | 3   | 115,352,768 | 0.15             | Add                        | 1.39 (0.9-2.14)         | 1.7 (0.96-3.02)      | 1.57 (0.75-3.31)  | 8.57E-01                         | 3.38E-01         | 9.73E-01   |



**Supplemental Table 2: SNP-Specific Results for Abstinence Rates at 6-Month Follow-up**

| SNP        | Gene        | Chr | Position    | MAF <sup>a</sup> | Genetic Model <sup>b</sup> | SNP Odds Ratio<br>(95% CI) | Treatment Odds Ratio |                  | Test of Interaction <sup>c</sup> | LRT <sup>d</sup> |            |
|------------|-------------|-----|-------------|------------------|----------------------------|----------------------------|----------------------|------------------|----------------------------------|------------------|------------|
|            |             |     |             |                  |                            |                            | WT (95% CI)          | Variant (95% CI) |                                  | Observed P       | Adjusted P |
| rs4792887  | CRHR1       | 17  | 41,232,791  | 0.12             | Dom                        | 1.04 (0.58-1.87)           | 1.58 (0.92-2.72)     | 1.96 (0.68-5.69) | 7.21E-01                         | 9.14E-01         | 9.73E-01   |
| rs4789172  | GRB2        | 17  | 70,853,307  | 0.49             | Add                        | 1.27 (0.91-1.78)           | 2.07 (0.87-4.93)     | 1.65 (1.02-2.67) | 5.15E-01                         | 3.53E-01         | 9.73E-01   |
| rs3814847  | CALM1       | 14  | 89,931,789  | 0.37             | Add                        | 1.23 (0.87-1.74)           | 1.66 (0.79-3.5)      | 1.72 (1.04-2.84) | 9.24E-01                         | 4.95E-01         | 9.73E-01   |
| rs3777432  | EPB41L2     | 6   | 131,225,509 | 0.16             | Add                        | 1.06 (0.67-1.67)           | 1.67 (0.94-2.95)     | 1.66 (0.76-3.63) | 9.88E-01                         | 9.73E-01         | 9.73E-01   |
| rs2846584  | ADCYAP1     | 18  | 894,054     | 0.28             | Dom                        | 0.82 (0.5-1.32)            | 1.27 (0.67-2.44)     | 2.29 (1.1-4.74)  | 2.41E-01                         | 4.00E-01         | 9.73E-01   |
| rs13428968 | NR4A2       | 2   | 156,900,859 | 0.17             | Dom                        | 1.27 (0.77-2.11)           | 1.84 (1.02-3.32)     | 1.31 (0.57-3.03) | 5.20E-01                         | 5.71E-01         | 9.74E-01   |
| rs2095961  | EPB41L2     | 6   | 131,325,953 | 0.35             | Dom                        | 0.98 (0.6-1.6)             | 2.66 (1.24-5.71)     | 1.19 (0.63-2.22) | 1.10E-01                         | 2.62E-01         | 9.74E-01   |
| rs2797853  | DBH         | 9   | 135,502,336 | 0.36             | Dom                        | 1.32 (0.79-2.21)           | 2.94 (1.25-6.89)     | 1.22 (0.67-2.2)  | 9.56E-02                         | 1.68E-01         | 9.74E-01   |
| rs2846579  | ADCYAP1     | 18  | 891,897     | 0.12             | Dom                        | 0.65 (0.35-1.21)           | 1.64 (0.96-2.8)      | 1.89 (0.6-5.96)  | 8.30E-01                         | 3.67E-01         | 9.74E-01   |
| rs9909076  | GRB2        | 17  | 70,896,404  | 0.20             | Dom                        | 0.78 (0.47-1.3)            | 1.47 (0.81-2.65)     | 2.03 (0.88-4.7)  | 5.37E-01                         | 5.56E-01         | 9.74E-01   |
| rs2053156  | GRB2        | 17  | 70,890,035  | 0.20             | Dom                        | 0.78 (0.47-1.3)            | 1.47 (0.81-2.65)     | 2.03 (0.88-4.7)  | 5.37E-01                         | 5.56E-01         | 9.74E-01   |
| rs12946365 | GRB2        | 17  | 70,829,239  | 0.27             | Add                        | 0.82 (0.56-1.22)           | 1.77 (0.94-3.33)     | 1.55 (0.84-2.88) | 7.49E-01                         | 5.39E-01         | 9.75E-01   |
| rs157220   | EPB41       | 1   | 29,083,883  | 0.38             | Add                        | 1.31 (0.94-1.83)           | 1.65 (0.78-3.46)     | 1.68 (1.02-2.77) | 9.49E-01                         | 2.62E-01         | 9.75E-01   |
| rs1879184  | CHRNA2      | 8   | 27,367,620  | 0.14             | Dom                        | 1.05 (0.61-1.81)           | 1.7 (0.97-2.97)      | 1.55 (0.61-3.98) | 8.73E-01                         | 9.75E-01         | 9.75E-01   |
| rs1879182  | CHRNA2      | 8   | 27,371,793  | 0.14             | Dom                        | 1.05 (0.61-1.81)           | 1.7 (0.97-2.97)      | 1.55 (0.61-3.98) | 8.73E-01                         | 9.75E-01         | 9.75E-01   |
| rs2709402  | CREB1       | 2   | 208,129,222 | 0.18             | Dom                        | 1.26 (0.77-2.07)           | 1.69 (0.92-3.09)     | 1.63 (0.73-3.61) | 9.42E-01                         | 6.64E-01         | 9.76E-01   |
| rs12039988 | EPB41       | 1   | 29,298,420  | 0.39             | Dom                        | 0.75 (0.52-1.06)           | 1.2 (0.57-2.51)      | 2.06 (1.09-3.9)  | 8.60E-01                         | 2.58E-01         | 9.76E-01   |
| rs2239316  | CREBBP      | 16  | 3,853,996   | 0.27             | Dom                        | 0.83 (0.51-1.34)           | 2.06 (1.07-3.97)     | 1.26 (0.61-2.57) | 3.21E-01                         | 4.09E-01         | 9.76E-01   |
| rs7856531  | FREQ (NCS1) | 9   | 132,000,447 | 0.46             | Dom                        | 1.02 (0.59-1.76)           | 3.61 (1.4-9.32)      | 1.21 (0.69-2.14) | 5.37E-02                         | 1.34E-01         | 9.76E-01   |
| rs6454673  | CNR1        | 6   | 88,927,768  | 0.31             | Add                        | 0.81 (0.56-1.18)           | 1.34 (0.71-2.51)     | 1.96 (1.08-3.54) | 3.13E-01                         | 3.63E-01         | 9.76E-01   |
| rs11852956 | CHRNA7      | 15  | 30,190,622  | 0.23             | Add                        | 0.99 (0.66-1.48)           | 1.8 (0.97-3.32)      | 1.5 (0.78-2.87)  | 6.65E-01                         | 9.08E-01         | 9.76E-01   |
| rs4789178  | GRB2        | 17  | 70,879,837  | 0.20             | Dom                        | 0.78 (0.47-1.29)           | 1.48 (0.82-2.68)     | 2.03 (0.88-4.71) | 5.48E-01                         | 5.49E-01         | 9.77E-01   |
| rs7017417  | CHRNA2      | 8   | 27,401,222  | 0.09             | Dom                        | 1.05 (0.56-1.94)           | 1.99 (1.16-3.41)     | 0.74 (0.24-2.26) | 1.19E-01                         | 2.98E-01         | 9.77E-01   |
| rs548646   | OPRM1       | 6   | 154,459,840 | 0.35             | Dom                        | 0.77 (0.48-1.25)           | 2.16 (1.06-4.41)     | 1.33 (0.69-2.57) | 3.30E-01                         | 3.01E-01         | 9.77E-01   |
| rs4559942  | GRB2        | 17  | 70,820,864  | 0.27             | Dom                        | 0.77 (0.48-1.24)           | 1.65 (0.86-3.14)     | 1.65 (0.8-3.41)  | 9.99E-01                         | 5.51E-01         | 9.77E-01   |
| rs613341   | OPRM1       | 6   | 154,484,971 | 0.10             | Add                        | 0.85 (0.47-1.54)           | 1.98 (1.16-3.38)     | 0.78 (0.27-2.28) | 1.22E-01                         | 2.67E-01         | 9.77E-01   |
| rs2329340  | DDC         | 7   | 50,587,723  | 0.33             | Add                        | 1.29 (0.91-1.83)           | 2.1 (1.03-4.3)       | 1.53 (0.92-2.57) | 3.85E-01                         | 2.85E-01         | 9.77E-01   |
| rs324035   | DRD3        | 3   | 115,351,544 | 0.21             | Dom                        | 1.29 (0.79-2.1)            | 2.01 (1.07-3.79)     | 1.27 (0.6-2.68)  | 3.57E-01                         | 4.31E-01         | 9.77E-01   |
| rs10499177 | EPB41L2     | 6   | 131,257,514 | 0.09             | Add                        | 0.85 (0.46-1.6)            | 1.93 (1.14-3.28)     | 0.77 (0.24-2.41) | 1.46E-01                         | 3.14E-01         | 9.78E-01   |
| rs2709371  | CREB1       | 2   | 208,092,932 | 0.19             | Add                        | 1.13 (0.74-1.72)           | 1.69 (0.94-3.05)     | 1.61 (0.8-3.25)  | 9.17E-01                         | 8.60E-01         | 9.78E-01   |
| rs2399496  | DRD3        | 3   | 115,328,703 | 0.48             | Dom                        | 0.92 (0.54-1.56)           | 0.94 (0.38-2.31)     | 2.06 (1.16-3.65) | 1.48E-01                         | 3.52E-01         | 9.78E-01   |
| rs1451368  | DDC         | 7   | 50,555,261  | 0.26             | Add                        | 1.19 (0.82-1.74)           | 1.34 (0.71-2.54)     | 2.05 (1.13-3.71) | 2.73E-01                         | 3.20E-01         | 9.78E-01   |
| rs4586205  | DRD2        | 11  | 112,812,339 | 0.25             | Dom                        | 0.98 (0.6-1.59)            | 1.59 (0.84-3.01)     | 1.75 (0.84-3.64) | 8.43E-01                         | 9.78E-01         | 9.78E-01   |
| rs2298432  | MAPK1       | 22  | 20,453,189  | 0.35             | Add                        | 0.95 (0.67-1.36)           | 1.36 (0.69-2.7)      | 1.81 (1.05-3.1)  | 4.46E-01                         | 7.44E-01         | 9.79E-01   |
| rs4789176  | GRB2        | 17  | 70,864,463  | 0.19             | Dom                        | 0.76 (0.46-1.27)           | 1.57 (0.88-2.82)     | 1.78 (0.75-4.2)  | 8.16E-01                         | 5.70E-01         | 9.79E-01   |
| rs1369299  | GRB2        | 17  | 70,858,920  | 0.19             | Dom                        | 0.76 (0.46-1.27)           | 1.57 (0.88-2.82)     | 1.78 (0.75-4.2)  | 8.16E-01                         | 5.70E-01         | 9.79E-01   |
| rs4947577  | DDC         | 7   | 50,516,103  | 0.41             | Add                        | 1.3 (0.93-1.82)            | 1.51 (0.7-3.27)      | 1.66 (1.02-2.71) | 7.84E-01                         | 2.86E-01         | 9.79E-01   |
| rs2583975  | SNCA        | 4   | 90,967,511  | 0.23             | Add                        | 1.19 (0.8-1.76)            | 2.1 (1.12-3.93)      | 1.29 (0.69-2.42) | 2.34E-01                         | 4.20E-01         | 9.79E-01   |
| rs739362   | GNAZ        | 22  | 21,774,067  | 0.28             | Dom                        | 1.41 (0.86-2.32)           | 1.69 (0.84-3.43)     | 1.72 (0.85-3.52) | 9.72E-01                         | 3.88E-01         | 9.79E-01   |

**Supplemental Table 2: SNP-Specific Results for Abstinence Rates at 6-Month Follow-up**

| SNP        | Gene        | Chr | Position    | MAF <sup>a</sup> | Genetic Model <sup>b</sup> | SNP Odds Ratio<br>(95% CI) | Treatment Odds Ratio |                  | Test of Interaction <sup>c</sup> | LRT <sup>d</sup> |            |
|------------|-------------|-----|-------------|------------------|----------------------------|----------------------------|----------------------|------------------|----------------------------------|------------------|------------|
|            |             |     |             |                  |                            |                            | WT (95% CI)          | Variant (95% CI) |                                  | Observed P       | Adjusted P |
| rs1470750  | DDC         | 7   | 50,544,142  | 0.42             | Dom                        | 0.75 (0.46-1.24)           | 2.08 (0.93-4.64)     | 1.46 (0.8-2.68)  | 4.94E-01                         | 3.82E-01         | 9.79E-01   |
| rs126014   | EPB41       | 1   | 29,092,765  | 0.38             | Add                        | 1.31 (0.94-1.83)           | 1.7 (0.8-3.63)       | 1.76 (1.07-2.9)  | 9.19E-01                         | 2.73E-01         | 9.79E-01   |
| rs12473543 | POMC        | 2   | 25,240,685  | 0.22             | Dom                        | 1 (0.61-1.63)              | 1.9 (1.02-3.56)      | 1.34 (0.63-2.85) | 4.78E-01                         | 7.76E-01         | 9.79E-01   |
| rs2651418  | CHRNA7      | 15  | 30,226,573  | 0.49             | Dom                        | 1.12 (0.64-1.96)           | 0.75 (0.29-1.98)     | 2.18 (1.24-3.83) | 6.39E-02                         | 1.57E-01         | 9.79E-01   |
| rs12273363 | BDNF        | 11  | 27,701,435  | 0.16             | Dom                        | 1.01 (0.6-1.72)            | 1.61 (0.9-2.89)      | 1.98 (0.81-4.83) | 7.09E-01                         | 9.26E-01         | 9.79E-01   |
| rs16840214 | NR4A2       | 2   | 156,875,018 | 0.21             | Add                        | 0.87 (0.53-1.43)           | 1.52 (0.85-2.75)     | 1.87 (0.94-3.73) | 6.19E-01                         | 7.83E-01         | 9.80E-01   |
| rs167771   | DRD3        | 3   | 115,358,965 | 0.19             | Dom                        | 1.19 (0.72-1.95)           | 2.06 (1.11-3.81)     | 1.16 (0.53-2.55) | 2.60E-01                         | 4.52E-01         | 9.80E-01   |
| rs13054331 | GNAZ        | 22  | 21,737,063  | 0.24             | Dom                        | 0.72 (0.44-1.18)           | 1.7 (0.92-3.13)      | 1.57 (0.72-3.44) | 8.79E-01                         | 3.98E-01         | 9.80E-01   |
| rs3756450  | SLC6A3      | 5   | 1,501,148   | 0.11             | Add                        | 0.82 (0.46-1.44)           | 1.96 (1.15-3.36)     | 0.86 (0.31-2.38) | 1.52E-01                         | 2.76E-01         | 9.80E-01   |
| rs1611123  | DBH         | 9   | 135,498,904 | 0.50             | Add                        | 0.83 (0.6-1.17)            | 2.48 (1.1-5.58)      | 1.63 (1-2.64)    | 2.27E-01                         | 2.45E-01         | 9.80E-01   |
| rs2266966  | MAPK1       | 22  | 20,451,554  | 0.44             | Add                        | 0.79 (0.48-1.31)           | 1.49 (0.71-3.12)     | 1.69 (1.03-2.77) | 4.55E-01                         | 5.36E-01         | 9.81E-01   |
| rs12072697 | EPB41       | 1   | 29,209,878  | 0.09             | Add                        | 0.89 (0.48-1.64)           | 1.63 (0.97-2.75)     | 1.68 (0.53-5.37) | 9.63E-01                         | 9.28E-01         | 9.81E-01   |
| rs743409   | MAPK1       | 22  | 20,459,215  | 0.45             | Add                        | 0.89 (0.53-1.47)           | 1.77 (0.82-3.82)     | 1.65 (1.01-2.68) | 9.32E-01                         | 8.97E-01         | 9.81E-01   |
| rs2797855  | DBH         | 9   | 135,500,715 | 0.43             | Dom                        | 0.85 (0.51-1.42)           | 2.94 (1.23-7.05)     | 1.25 (0.69-2.24) | 1.11E-01                         | 1.78E-01         | 9.81E-01   |
| rs3827315  | GNAZ        | 22  | 21,752,890  | 0.29             | Dom                        | 1.39 (0.86-2.25)           | 1.79 (0.89-3.6)      | 1.57 (0.79-3.1)  | 7.90E-01                         | 4.06E-01         | 9.81E-01   |
| rs2297853  | EPB41L2     | 6   | 131,318,638 | 0.35             | Dom                        | 1.02 (0.62-1.66)           | 2.65 (1.23-5.68)     | 1.21 (0.64-2.26) | 1.20E-01                         | 2.89E-01         | 9.81E-01   |
| rs2134655  | DRD3        | 3   | 115,340,891 | 0.27             | Add                        | 0.77 (0.47-1.25)           | 1.67 (0.9-3.09)      | 1.73 (0.9-3.33)  | 6.68E-01                         | 5.37E-01         | 9.81E-01   |
| rs10770141 | TH          | 11  | 2,150,416   | 0.39             | Dom                        | 1.5 (0.89-2.53)            | 1.71 (0.72-4.09)     | 1.62 (0.91-2.9)  | 9.18E-01                         | 2.98E-01         | 9.81E-01   |
| rs5756908  | PRKCABP     | 22  | 36,806,525  | 0.48             | Dom                        | 1.25 (0.72-2.18)           | 1.62 (0.61-4.32)     | 1.67 (0.96-2.91) | 9.57E-01                         | 7.14E-01         | 9.81E-01   |
| rs9902966  | GRB2        | 17  | 70,873,742  | 0.20             | Dom                        | 0.8 (0.48-1.32)            | 1.47 (0.81-2.65)     | 2.03 (0.88-4.7)  | 5.38E-01                         | 5.88E-01         | 9.81E-01   |
| rs6501775  | GRB2        | 17  | 70,822,168  | 0.05             | Dom                        | 1.15 (0.52-2.5)            | 1.89 (1.12-3.18)     | 0.88 (0.2-3.79)  | 3.36E-01                         | 5.61E-01         | 9.81E-01   |
| rs168552   | SNCA        | 4   | 90,862,167  | 0.29             | Add                        | 0.81 (0.54-1.22)           | 1.35 (0.71-2.55)     | 2.06 (1.09-3.88) | 3.12E-01                         | 4.30E-01         | 9.81E-01   |
| rs11564703 | TH          | 11  | 2,163,785   | 0.41             | Dom                        | 1.12 (0.68-1.85)           | 1.25 (0.55-2.84)     | 1.92 (1.06-3.48) | 4.08E-01                         | 6.10E-01         | 9.81E-01   |
| rs2087017  | DRD3        | 3   | 115,324,703 | 0.43             | Add                        | 0.95 (0.57-1.59)           | 1.22 (0.58-2.6)      | 1.76 (1.07-2.9)  | 1.89E-01                         | 4.22E-01         | 9.82E-01   |
| rs2023239  | CNR1        | 6   | 88,917,201  | 0.18             | Dom                        | 1.05 (0.63-1.73)           | 2.08 (1.14-3.8)      | 1.08 (0.48-2.45) | 2.08E-01                         | 4.53E-01         | 9.82E-01   |
| rs356204   | SNCA        | 4   | 90,882,565  | 0.43             | Dom                        | 1.11 (0.65-1.89)           | 0.94 (0.39-2.3)      | 1.93 (1.06-3.51) | 1.92E-01                         | 3.70E-01         | 9.82E-01   |
| rs12953076 | CRHR1       | 17  | 41,209,781  | 0.17             | Dom                        | 1.2 (0.72-1.99)            | 1.75 (0.97-3.17)     | 1.48 (0.65-3.38) | 7.44E-01                         | 7.60E-01         | 9.82E-01   |
| rs2551642  | CREB1       | 2   | 208,121,742 | 0.18             | Dom                        | 1.25 (0.76-2.05)           | 1.69 (0.92-3.1)      | 1.6 (0.72-3.55)  | 9.13E-01                         | 6.89E-01         | 9.82E-01   |
| rs1806584  | CREB1       | 2   | 208,174,515 | 0.18             | Dom                        | 1.25 (0.76-2.05)           | 1.69 (0.92-3.1)      | 1.6 (0.72-3.55)  | 9.13E-01                         | 6.89E-01         | 9.82E-01   |
| rs1045780  | CREB1       | 2   | 208,175,395 | 0.18             | Dom                        | 1.25 (0.76-2.05)           | 1.69 (0.92-3.1)      | 1.6 (0.72-3.55)  | 9.13E-01                         | 6.89E-01         | 9.82E-01   |
| rs2551921  | CREB1       | 2   | 208,143,800 | 0.18             | Dom                        | 1.25 (0.76-2.05)           | 1.69 (0.92-3.1)      | 1.6 (0.72-3.55)  | 9.13E-01                         | 6.89E-01         | 9.82E-01   |
| rs7024495  | FREQ (NCS1) | 9   | 132,007,017 | 0.48             | Dom                        | 1.06 (0.6-1.86)            | 3.75 (1.37-10.26)    | 1.23 (0.71-2.16) | 5.84E-02                         | 1.44E-01         | 9.83E-01   |
| rs1805300  | NCK1        | 3   | 138,058,932 | 0.32             | Add                        | 0.83 (0.57-1.22)           | 1.58 (0.81-3.07)     | 1.7 (0.96-3.01)  | 8.56E-01                         | 6.31E-01         | 9.83E-01   |
| rs4678448  | NCK1        | 3   | 138,053,879 | 0.32             | Add                        | 0.83 (0.57-1.22)           | 1.58 (0.81-3.07)     | 1.7 (0.96-3.01)  | 8.56E-01                         | 6.31E-01         | 9.83E-01   |
| rs7932167  | DRD4        | 11  | 610,599     | 0.21             | Dom                        | 1.14 (0.7-1.85)            | 2.07 (1.1-3.9)       | 1.12 (0.53-2.4)  | 2.25E-01                         | 4.49E-01         | 9.83E-01   |
| rs8065441  | GRB2        | 17  | 70,922,042  | 0.15             | Add                        | 0.78 (0.46-1.31)           | 1.7 (0.97-2.99)      | 1.52 (0.62-3.72) | 8.26E-01                         | 6.02E-01         | 9.83E-01   |
| rs1544582  | PRKAR2B     | 7   | 106,475,074 | 0.47             | Add                        | 0.96 (0.68-1.35)           | 1.77 (0.79-3.93)     | 1.66 (1.02-2.69) | 8.55E-01                         | 9.54E-01         | 9.83E-01   |
| rs130021   | CREBBP      | 16  | 3,772,472   | 0.35             | Dom                        | 0.87 (0.54-1.41)           | 1.12 (0.54-2.33)     | 2.23 (1.16-4.25) | 1.70E-01                         | 3.58E-01         | 9.84E-01   |
| rs4579483  | DDC         | 7   | 50,513,594  | 0.41             | Add                        | 1.28 (0.92-1.79)           | 1.57 (0.73-3.38)     | 1.69 (1.03-2.75) | 8.37E-01                         | 3.20E-01         | 9.84E-01   |

**Supplemental Table 2: SNP-Specific Results for Abstinence Rates at 6-Month Follow-up**

| SNP        | Gene        | Chr | Position    | MAF <sup>a</sup> | Genetic Model <sup>b</sup> | SNP Odds Ratio<br>(95% CI) | Treatment Odds Ratio |                  | Test of Interaction <sup>c</sup> | LRT <sup>d</sup> |            |
|------------|-------------|-----|-------------|------------------|----------------------------|----------------------------|----------------------|------------------|----------------------------------|------------------|------------|
|            |             |     |             |                  |                            |                            | WT (95% CI)          | Variant (95% CI) |                                  | Observed P       | Adjusted P |
| rs6784005  | NCK1        | 3   | 138,095,451 | 0.31             | Add                        | 0.87 (0.58-1.31)           | 1.55 (0.77-3.13)     | 1.81 (0.99-3.33) | 7.06E-01                         | 7.57E-01         | 9.84E-01   |
| rs1385884  | DRD3        | 3   | 115,324,315 | 0.43             | Add                        | 0.95 (0.57-1.59)           | 1.23 (0.58-2.62)     | 1.75 (1.06-2.88) | 1.95E-01                         | 4.33E-01         | 9.84E-01   |
| rs11043016 | TH          | 11  | 2,162,603   | 0.26             | Dom                        | 1.32 (0.81-2.13)           | 1.34 (0.69-2.62)     | 2.04 (1-4.14)    | 4.05E-01                         | 3.30E-01         | 9.84E-01   |
| rs2834590  | CLIC6       | 21  | 34,991,708  | 0.17             | Add                        | 1.08 (0.65-1.81)           | 1.52 (0.85-2.71)     | 1.97 (0.85-4.59) | 5.80E-01                         | 7.84E-01         | 9.84E-01   |
| rs17152020 | DDC         | 7   | 50,517,353  | 0.21             | Dom                        | 1.21 (0.74-1.97)           | 1.31 (0.71-2.43)     | 2.36 (1.08-5.13) | 2.49E-01                         | 3.52E-01         | 9.85E-01   |
| rs10776672 | CALCYON     | 10  | 135,007,945 | 0.11             | Dom                        | 0.91 (0.5-1.67)            | 1.62 (0.95-2.77)     | 1.87 (0.63-5.53) | 8.17E-01                         | 9.36E-01         | 9.85E-01   |
| rs9314348  | CHRNA2      | 8   | 27,401,343  | 0.10             | Dom                        | 1.02 (0.55-1.88)           | 1.97 (1.15-3.37)     | 0.78 (0.26-2.38) | 1.43E-01                         | 3.43E-01         | 9.85E-01   |
| rs7852859  | FREQ (NCS1) | 9   | 132,034,981 | 0.12             | Dom                        | 1.05 (0.61-1.83)           | 1.74 (1-3.05)        | 1.46 (0.56-3.79) | 7.53E-01                         | 9.37E-01         | 9.85E-01   |
| rs10042486 | HTR1A       | 5   | 63,297,085  | 0.50             | Add                        | 1.1 (0.79-1.53)            | 1.39 (0.6-3.2)       | 1.64 (1.01-2.65) | 6.31E-01                         | 7.42E-01         | 9.85E-01   |
| rs6578993  | TH          | 11  | 2,157,739   | 0.14             | Dom                        | 0.95 (0.55-1.65)           | 1.5 (0.86-2.62)      | 2.2 (0.84-5.76)  | 5.00E-01                         | 7.92E-01         | 9.85E-01   |
| rs11030107 | BDNF        | 11  | 27,651,411  | 0.23             | Add                        | 0.74 (0.47-1.18)           | 1.53 (0.84-2.8)      | 2.37 (1.09-5.18) | 3.57E-01                         | 3.62E-01         | 9.85E-01   |
| rs2304297  | CHRNA6      | 8   | 42,727,356  | 0.23             | Add                        | 0.94 (0.62-1.41)           | 1.71 (0.94-3.14)     | 1.57 (0.81-3.05) | 8.35E-01                         | 9.30E-01         | 9.86E-01   |
| rs933063   | EPB41L2     | 6   | 131,225,408 | 0.32             | Add                        | 0.92 (0.65-1.32)           | 2.24 (1.15-4.35)     | 1.4 (0.81-2.44)  | 2.03E-01                         | 4.04E-01         | 9.86E-01   |
| rs3113355  | SNCA        | 4   | 90,964,368  | 0.23             | Dom                        | 1.23 (0.76-1.99)           | 1.96 (1.02-3.76)     | 1.36 (0.66-2.82) | 4.63E-01                         | 5.79E-01         | 9.86E-01   |
| rs17016190 | SNCA        | 4   | 90,941,855  | 0.06             | Add                        | 1.07 (0.52-2.21)           | 1.59 (0.95-2.66)     | 2.3 (0.59-8.93)  | 6.18E-01                         | 8.74E-01         | 9.86E-01   |
| rs3775443  | SNCA        | 4   | 90,934,697  | 0.06             | Add                        | 1.07 (0.52-2.21)           | 1.59 (0.95-2.66)     | 2.3 (0.59-8.93)  | 6.18E-01                         | 8.74E-01         | 9.86E-01   |
| rs2630349  | DRD3        | 3   | 115,356,062 | 0.07             | Add                        | 1.47 (0.81-2.68)           | 1.68 (1-2.83)        | 1.53 (0.5-4.7)   | 8.76E-01                         | 4.63E-01         | 9.86E-01   |
| rs324032   | DRD3        | 3   | 115,360,518 | 0.07             | Add                        | 1.47 (0.81-2.68)           | 1.68 (1-2.83)        | 1.53 (0.5-4.7)   | 8.76E-01                         | 4.63E-01         | 9.86E-01   |
| rs2630350  | DRD3        | 3   | 115,357,686 | 0.07             | Add                        | 1.47 (0.81-2.68)           | 1.68 (1-2.83)        | 1.53 (0.5-4.7)   | 8.76E-01                         | 4.63E-01         | 9.86E-01   |
| rs10902188 | DRD4        | 11  | 644,043     | 0.09             | Add                        | 1.34 (0.76-2.37)           | 1.68 (0.99-2.88)     | 1.48 (0.52-4.19) | 8.29E-01                         | 6.12E-01         | 9.86E-01   |
| rs265971   | DRD1        | 5   | 174,793,017 | 0.28             | Add                        | 0.81 (0.55-1.18)           | 1.62 (0.87-3.01)     | 1.7 (0.91-3.15)  | 9.06E-01                         | 5.34E-01         | 9.86E-01   |
| rs806368   | CNR1        | 6   | 88,906,819  | 0.21             | Dom                        | 1.02 (0.63-1.67)           | 1.62 (0.88-3)        | 1.73 (0.8-3.77)  | 8.96E-01                         | 9.87E-01         | 9.87E-01   |
| rs2565055  | CHRNA2      | 8   | 27,393,297  | 0.24             | Dom                        | 1.29 (0.8-2.08)            | 1.36 (0.71-2.61)     | 2.22 (1.09-4.55) | 3.20E-01                         | 3.14E-01         | 9.87E-01   |
| rs6092704  | GNAS        | 20  | 56,901,873  | 0.10             | Add                        | 0.71 (0.38-1.3)            | 1.88 (1.11-3.18)     | 1 (0.32-3.09)    | 3.16E-01                         | 2.47E-01         | 9.87E-01   |
| rs409588   | SLC6A3      | 5   | 1,483,834   | 0.19             | Add                        | 0.79 (0.5-1.26)            | 1.68 (0.95-2.97)     | 1.63 (0.75-3.56) | 9.51E-01                         | 6.02E-01         | 9.87E-01   |
| rs1108581  | DBH         | 9   | 135,495,062 | 0.18             | Dom                        | 0.64 (0.37-1.09)           | 1.71 (0.97-3.02)     | 1.53 (0.61-3.84) | 8.42E-01                         | 2.24E-01         | 9.87E-01   |
| rs2076370  | PRKCABP     | 22  | 36,793,914  | 0.39             | Dom                        | 1.12 (0.68-1.85)           | 2.49 (1.08-5.72)     | 1.3 (0.71-2.37)  | 2.14E-01                         | 4.42E-01         | 9.87E-01   |
| rs10476156 | DRD1        | 5   | 174,795,276 | 0.14             | Add                        | 0.9 (0.55-1.47)            | 1.91 (1.09-3.35)     | 1.14 (0.49-2.66) | 2.98E-01                         | 5.35E-01         | 9.87E-01   |
| rs12639080 | DRD3        | 3   | 115,386,481 | 0.34             | Add                        | 1.23 (0.86-1.76)           | 1.7 (0.83-3.52)      | 1.68 (1-2.83)    | 9.74E-01                         | 5.20E-01         | 9.88E-01   |
| rs2472554  | CHRNA2      | 8   | 27,384,271  | 0.30             | Dom                        | 1.06 (0.66-1.72)           | 2.46 (1.21-5.04)     | 1.16 (0.6-2.24)  | 1.30E-01                         | 3.14E-01         | 9.88E-01   |
| rs2737033  | SNCA        | 4   | 90,926,970  | 0.27             | Dom                        | 0.77 (0.48-1.26)           | 1.43 (0.75-2.7)      | 2.04 (0.97-4.27) | 4.74E-01                         | 4.93E-01         | 9.88E-01   |
| rs10085024 | HTR1A       | 5   | 63,284,120  | 0.49             | Add                        | 1.08 (0.77-1.51)           | 1.34 (0.59-3.07)     | 1.65 (1.02-2.67) | 5.47E-01                         | 7.36E-01         | 9.88E-01   |
| rs2283791  | MAPK1       | 22  | 20,460,945  | 0.44             | Add                        | 0.81 (0.49-1.34)           | 1.45 (0.69-3.03)     | 1.67 (1.02-2.73) | 4.44E-01                         | 5.74E-01         | 9.88E-01   |
| rs5871     | CALM1       | 14  | 89,941,231  | 0.07             | Add                        | 1.02 (0.55-1.9)            | 1.76 (1.04-2.95)     | 1.18 (0.37-3.75) | 5.34E-01                         | 8.26E-01         | 9.89E-01   |
| rs2191416  | CREBBP      | 16  | 3,710,730   | 0.24             | Add                        | 1.1 (0.74-1.62)            | 1.65 (0.88-3.09)     | 1.67 (0.9-3.1)   | 9.77E-01                         | 8.95E-01         | 9.89E-01   |
| rs7790758  | DDC         | 7   | 50,529,038  | 0.20             | Add                        | 1.28 (0.84-1.93)           | 1.92 (1.05-3.52)     | 1.32 (0.68-2.59) | 3.82E-01                         | 3.95E-01         | 9.89E-01   |
| rs896309   | DDC         | 7   | 50,512,516  | 0.20             | Add                        | 1.28 (0.84-1.93)           | 1.92 (1.05-3.52)     | 1.32 (0.68-2.59) | 3.82E-01                         | 3.95E-01         | 9.89E-01   |
| rs896307   | DDC         | 7   | 50,536,554  | 0.20             | Add                        | 1.28 (0.84-1.93)           | 1.92 (1.05-3.52)     | 1.32 (0.68-2.59) | 3.82E-01                         | 3.95E-01         | 9.89E-01   |
| rs11771818 | DDC         | 7   | 50,509,669  | 0.12             | Add                        | 1.29 (0.77-2.17)           | 1.5 (0.86-2.62)      | 2.25 (0.9-5.58)  | 4.52E-01                         | 4.17E-01         | 9.89E-01   |

**Supplemental Table 2: SNP-Specific Results for Abstinence Rates at 6-Month Follow-up**

| SNP        | Gene    | Chr | Position    | MAF <sup>a</sup> | Genetic Model <sup>b</sup> | SNP Odds Ratio<br>(95% CI) | Treatment Odds Ratio |                  | Test of Interaction <sup>c</sup> | LRT <sup>d</sup> |            |
|------------|---------|-----|-------------|------------------|----------------------------|----------------------------|----------------------|------------------|----------------------------------|------------------|------------|
|            |         |     |             |                  |                            |                            | WT (95% CI)          | Variant (95% CI) |                                  | Observed P       | Adjusted P |
| rs2551928  | CREB1   | 2   | 208,174,023 | 0.19             | Dom                        | 1.22 (0.74-1.99)           | 1.67 (0.91-3.08)     | 1.62 (0.74-3.56) | 9.47E-01                         | 7.43E-01         | 9.89E-01   |
| rs2075572  | OPRM1   | 6   | 154,453,697 | 0.44             | Add                        | 0.78 (0.55-1.09)           | 1.99 (0.95-4.17)     | 1.63 (0.99-2.68) | 5.62E-01                         | 2.58E-01         | 9.89E-01   |
| rs1451372  | DDC     | 7   | 50,521,365  | 0.41             | Add                        | 1.27 (0.91-1.78)           | 1.59 (0.74-3.42)     | 1.68 (1.03-2.74) | 8.66E-01                         | 3.50E-01         | 9.89E-01   |
| rs2110113  | CALM1   | 14  | 89,922,506  | 0.12             | Add                        | 1.04 (0.62-1.74)           | 1.66 (0.96-2.86)     | 1.69 (0.67-4.28) | 9.71E-01                         | 9.90E-01         | 9.90E-01   |
| rs6935267  | EPB41L2 | 6   | 131,204,791 | 0.16             | Add                        | 0.94 (0.59-1.49)           | 1.36 (0.78-2.36)     | 2.61 (1.15-5.96) | 1.70E-01                         | 3.59E-01         | 9.90E-01   |
| rs760973   | PRKCABP | 22  | 36,777,212  | 0.44             | Add                        | 1.22 (0.71-2.11)           | 1.93 (0.85-4.35)     | 1.66 (1.02-2.69) | 2.60E-01                         | 4.55E-01         | 9.90E-01   |
| rs2343662  | NCK1    | 3   | 138,083,736 | 0.31             | Add                        | 0.84 (0.57-1.23)           | 1.6 (0.83-3.11)      | 1.69 (0.95-2.99) | 8.98E-01                         | 6.73E-01         | 9.90E-01   |
| rs6295     | HTR1A   | 5   | 63,294,321  | 0.50             | Add                        | 1.13 (0.81-1.59)           | 1.48 (0.63-3.48)     | 1.65 (1.02-2.69) | 7.54E-01                         | 7.19E-01         | 9.90E-01   |
| rs4821733  | PRKCABP | 22  | 36,779,340  | 0.44             | Dom                        | 1.32 (0.78-2.25)           | 2.42 (0.97-6.07)     | 1.43 (0.81-2.52) | 3.38E-01                         | 4.14E-01         | 9.90E-01   |
| rs6026561  | GNAS    | 20  | 56,860,527  | 0.36             | Add                        | 0.86 (0.6-1.24)            | 1.11 (0.56-2.19)     | 1.94 (1.11-3.37) | 1.35E-01                         | 2.41E-01         | 9.90E-01   |
| rs6347     | SLC6A3  | 5   | 1,464,412   | 0.27             | Dom                        | 1.38 (0.84-2.27)           | 2.07 (0.99-4.31)     | 1.5 (0.76-2.96)  | 5.30E-01                         | 3.97E-01         | 9.90E-01   |
| rs2975226  | SLC6A3  | 5   | 1,498,616   | 0.39             | Add                        | 1.12 (0.78-1.61)           | 2.25 (1.03-4.92)     | 1.35 (0.79-2.29) | 1.63E-01                         | 3.18E-01         | 9.90E-01   |
| rs40184    | SLC6A3  | 5   | 1,448,077   | 0.46             | Add                        | 1.1 (0.78-1.56)            | 2.94 (1.25-6.94)     | 1.7 (1.03-2.79)  | 1.23E-01                         | 2.90E-01         | 9.91E-01   |
| rs6265     | BDNF    | 11  | 27,636,492  | 0.18             | Add                        | 0.96 (0.6-1.51)            | 1.33 (0.75-2.37)     | 2.45 (1.13-5.29) | 1.92E-01                         | 4.12E-01         | 9.91E-01   |
| rs11704205 | MAPK1   | 22  | 20,475,253  | 0.46             | Add                        | 1 (0.71-1.4)               | 1.87 (0.86-4.09)     | 1.64 (1.01-2.66) | 7.02E-01                         | 9.27E-01         | 9.91E-01   |
| rs5999550  | MAPK1   | 22  | 20,481,286  | 0.46             | Add                        | 1 (0.71-1.4)               | 1.87 (0.86-4.09)     | 1.64 (1.01-2.66) | 7.02E-01                         | 9.27E-01         | 9.91E-01   |
| rs1892848  | MAPK1   | 22  | 20,516,562  | 0.46             | Add                        | 1 (0.71-1.4)               | 1.87 (0.86-4.09)     | 1.64 (1.01-2.66) | 7.02E-01                         | 9.27E-01         | 9.91E-01   |
| rs9612225  | GNAZ    | 22  | 21,736,619  | 0.25             | Add                        | 0.78 (0.52-1.17)           | 1.72 (0.94-3.17)     | 1.66 (0.85-3.23) | 9.29E-01                         | 4.77E-01         | 9.91E-01   |
| rs7271854  | GNAS    | 20  | 56,880,417  | 0.41             | Add                        | 0.88 (0.61-1.26)           | 1.59 (0.75-3.37)     | 1.58 (0.95-2.63) | 9.90E-01                         | 7.75E-01         | 9.91E-01   |
| rs2070762  | TH      | 11  | 2,142,911   | 0.50             | Add                        | 0.92 (0.66-1.27)           | 2.14 (0.96-4.8)      | 1.63 (1.01-2.65) | 4.17E-01                         | 5.99E-01         | 9.91E-01   |
| rs1364043  | HTR1A   | 5   | 63,286,607  | 0.24             | Dom                        | 0.87 (0.53-1.43)           | 1.52 (0.82-2.79)     | 1.92 (0.88-4.22) | 6.39E-01                         | 7.92E-01         | 9.91E-01   |
| rs6592961  | DDC     | 7   | 50,540,384  | 0.22             | Dom                        | 1.12 (0.69-1.83)           | 1.54 (0.83-2.86)     | 1.9 (0.88-4.12)  | 6.79E-01                         | 8.12E-01         | 9.91E-01   |
| rs3952     | PRKCABP | 22  | 36,786,544  | 0.31             | Dom                        | 0.99 (0.61-1.6)            | 2.07 (1.03-4.18)     | 1.35 (0.7-2.63)  | 3.86E-01                         | 6.78E-01         | 9.92E-01   |
| rs2237649  | PRKAR2B | 7   | 106,481,518 | 0.47             | Add                        | 0.97 (0.69-1.36)           | 1.79 (0.81-3.99)     | 1.65 (1.01-2.67) | 8.08E-01                         | 9.52E-01         | 9.92E-01   |
| rs265972   | DRD1    | 5   | 174,793,122 | 0.46             | Add                        | 0.86 (0.61-1.19)           | 1.68 (0.78-3.59)     | 1.67 (1.03-2.73) | 9.96E-01                         | 6.51E-01         | 9.92E-01   |
| rs12652860 | SLC6A3  | 5   | 1,506,772   | 0.28             | Dom                        | 1.37 (0.84-2.21)           | 2.01 (1-4.06)        | 1.43 (0.73-2.8)  | 4.90E-01                         | 3.87E-01         | 9.92E-01   |
| rs1858746  | GNAZ    | 22  | 21,763,804  | 0.28             | Add                        | 1.3 (0.89-1.9)             | 1.83 (0.92-3.62)     | 1.57 (0.88-2.81) | 7.00E-01                         | 3.99E-01         | 9.92E-01   |
| rs575710   | EPB41   | 1   | 29,319,242  | 0.09             | Add                        | 0.87 (0.47-1.62)           | 1.65 (0.98-2.76)     | 1.75 (0.55-5.58) | 9.21E-01                         | 9.08E-01         | 9.92E-01   |
| rs2583958  | SNCA    | 4   | 90,939,388  | 0.27             | Dom                        | 0.78 (0.48-1.27)           | 1.44 (0.76-2.73)     | 2.02 (0.96-4.23) | 5.00E-01                         | 5.25E-01         | 9.92E-01   |
| rs2619373  | SNCA    | 4   | 90,941,456  | 0.27             | Dom                        | 0.78 (0.48-1.27)           | 1.44 (0.76-2.73)     | 2.02 (0.96-4.23) | 5.00E-01                         | 5.25E-01         | 9.92E-01   |
| rs2551931  | CREB1   | 2   | 208,179,725 | 0.18             | Dom                        | 1.22 (0.74-2.01)           | 1.7 (0.93-3.12)      | 1.6 (0.72-3.55)  | 9.02E-01                         | 7.38E-01         | 9.92E-01   |
| rs2301134  | SNCA    | 4   | 90,977,968  | 0.49             | Add                        | 0.99 (0.7-1.4)             | 1.34 (0.58-3.11)     | 1.66 (1.03-2.69) | 5.48E-01                         | 8.34E-01         | 9.92E-01   |
| rs456082   | SLC6A3  | 5   | 1,483,515   | 0.19             | Add                        | 0.78 (0.49-1.24)           | 1.6 (0.9-2.85)       | 1.53 (0.7-3.38)  | 9.28E-01                         | 5.60E-01         | 9.92E-01   |
| rs16952813 | ADCYAP1 | 18  | 914,630     | 0.08             | Add                        | 1.04 (0.54-2)              | 1.66 (0.98-2.79)     | 1.67 (0.49-5.66) | 9.93E-01                         | 9.93E-01         | 9.93E-01   |
| rs11660066 | ADCYAP1 | 18  | 918,035     | 0.08             | Add                        | 1.04 (0.54-2)              | 1.66 (0.98-2.79)     | 1.67 (0.49-5.66) | 9.93E-01                         | 9.93E-01         | 9.93E-01   |
| rs1076562  | DRD2    | 11  | 112,801,218 | 0.24             | Add                        | 0.88 (0.54-1.44)           | 1.76 (0.95-3.28)     | 1.56 (0.83-2.92) | 8.82E-01                         | 8.68E-01         | 9.93E-01   |
| rs4947584  | DDC     | 7   | 50,540,203  | 0.35             | Dom                        | 1.38 (0.84-2.27)           | 1.62 (0.73-3.6)      | 1.84 (1-3.4)     | 8.05E-01                         | 3.95E-01         | 9.93E-01   |
| rs6775389  | NCK1    | 3   | 138,142,414 | 0.31             | Add                        | 0.85 (0.58-1.24)           | 1.59 (0.82-3.08)     | 1.69 (0.95-3.01) | 8.70E-01                         | 6.93E-01         | 9.93E-01   |
| rs938525   | NCK1    | 3   | 138,064,643 | 0.31             | Add                        | 0.85 (0.58-1.24)           | 1.59 (0.82-3.08)     | 1.69 (0.95-3.01) | 8.70E-01                         | 6.93E-01         | 9.93E-01   |

**Supplemental Table 2: SNP-Specific Results for Abstinence Rates at 6-Month Follow-up**

| SNP        | Gene        | Chr | Position    | MAF <sup>a</sup> | Genetic Model <sup>b</sup> | SNP Odds Ratio<br>(95% CI) | Treatment Odds Ratio |                   | Test of Interaction <sup>c</sup> | LRT <sup>d</sup> |            |
|------------|-------------|-----|-------------|------------------|----------------------------|----------------------------|----------------------|-------------------|----------------------------------|------------------|------------|
|            |             |     |             |                  |                            |                            | WT (95% CI)          | Variant (95% CI)  |                                  | Observed P       | Adjusted P |
| rs9846691  | NCK1        | 3   | 138,088,961 | 0.31             | Add                        | 0.85 (0.58-1.24)           | 1.59 (0.82-3.08)     | 1.69 (0.95-3.01)  | 8.70E-01                         | 6.93E-01         | 9.93E-01   |
| rs1865149  | NCK1        | 3   | 138,078,300 | 0.31             | Add                        | 0.85 (0.58-1.24)           | 1.59 (0.82-3.08)     | 1.69 (0.95-3.01)  | 8.70E-01                         | 6.93E-01         | 9.93E-01   |
| rs4678274  | NCK1        | 3   | 138,121,927 | 0.31             | Add                        | 0.85 (0.58-1.24)           | 1.59 (0.82-3.08)     | 1.69 (0.95-3.01)  | 8.70E-01                         | 6.93E-01         | 9.93E-01   |
| rs12330283 | NCK1        | 3   | 138,073,101 | 0.31             | Add                        | 0.85 (0.58-1.24)           | 1.59 (0.82-3.08)     | 1.69 (0.95-3.01)  | 8.70E-01                         | 6.93E-01         | 9.93E-01   |
| rs9352483  | HTR1B       | 6   | 78,246,975  | 0.15             | Dom                        | 1.01 (0.59-1.73)           | 1.57 (0.9-2.75)      | 1.97 (0.77-5.06)  | 6.87E-01                         | 9.16E-01         | 9.93E-01   |
| rs835636   | NCK1        | 3   | 138,157,190 | 0.48             | Dom                        | 1.1 (0.63-1.94)            | 2.57 (0.94-6.97)     | 1.43 (0.83-2.49)  | 3.17E-01                         | 5.87E-01         | 9.93E-01   |
| rs737662   | PRKCABP     | 22  | 36,782,311  | 0.31             | Dom                        | 0.96 (0.6-1.56)            | 2.04 (1.02-4.11)     | 1.33 (0.68-2.61)  | 3.85E-01                         | 6.63E-01         | 9.93E-01   |
| rs242942   | CRHR1       | 17  | 41,247,413  | 0.13             | Add                        | 0.95 (0.56-1.6)            | 1.83 (1.06-3.16)     | 1.25 (0.49-3.19)  | 4.85E-01                         | 7.43E-01         | 9.93E-01   |
| rs267405   | DRD1        | 5   | 174,817,158 | 0.42             | Dom                        | 1.12 (0.68-1.87)           | 1.4 (0.6-3.25)       | 1.82 (1.01-3.27)  | 6.16E-01                         | 7.64E-01         | 9.93E-01   |
| rs267406   | DRD1        | 5   | 174,817,347 | 0.42             | Dom                        | 1.12 (0.68-1.87)           | 1.4 (0.6-3.25)       | 1.82 (1.01-3.27)  | 6.16E-01                         | 7.64E-01         | 9.93E-01   |
| rs2985332  | EPB41       | 1   | 29,211,686  | 0.15             | Dom                        | 0.8 (0.44-1.45)            | 1.38 (0.8-2.4)       | 3.11 (1.06-9.18)  | 1.91E-01                         | 3.75E-01         | 9.93E-01   |
| rs6297     | HTR1B       | 6   | 78,228,660  | 0.14             | Add                        | 0.98 (0.59-1.63)           | 2.03 (1.16-3.57)     | 0.97 (0.4-2.33)   | 1.51E-01                         | 3.50E-01         | 9.93E-01   |
| rs5755694  | MAPK1       | 22  | 20,530,530  | 0.44             | Dom                        | 0.93 (0.56-1.55)           | 1.93 (0.83-4.49)     | 1.55 (0.86-2.78)  | 6.71E-01                         | 8.65E-01         | 9.94E-01   |
| rs606148   | OPRM1       | 6   | 154,477,679 | 0.10             | Add                        | 0.88 (0.49-1.56)           | 1.95 (1.14-3.34)     | 0.86 (0.31-2.43)  | 1.63E-01                         | 3.44E-01         | 9.94E-01   |
| rs10040882 | SLC6A3      | 5   | 1,471,558   | 0.23             | Add                        | 0.86 (0.57-1.3)            | 1.92 (1.05-3.5)      | 1.36 (0.7-2.66)   | 4.15E-01                         | 5.00E-01         | 9.94E-01   |
| rs11564764 | SLC6A3      | 5   | 1,458,806   | 0.05             | Dom                        | 0.93 (0.39-2.19)           | 1.53 (0.93-2.54)     | 3.54 (0.65-19.23) | 3.54E-01                         | 6.18E-01         | 9.94E-01   |
| rs936465   | DRD4        | 11  | 633,568     | 0.45             | Add                        | 0.94 (0.66-1.34)           | 1.82 (0.8-4.09)      | 1.5 (0.9-2.48)    | 5.98E-01                         | 8.03E-01         | 9.94E-01   |
| rs3122156  | HCRTR2      | 6   | 55,190,766  | 0.26             | Add                        | 0.74 (0.49-1.11)           | 1.93 (1.04-3.57)     | 1.41 (0.73-2.71)  | 4.58E-01                         | 2.22E-01         | 9.94E-01   |
| rs11575313 | DDC         | 7   | 50,573,662  | 0.10             | Dom                        | 1.41 (0.78-2.57)           | 1.59 (0.92-2.73)     | 2.25 (0.77-6.57)  | 5.65E-01                         | 4.53E-01         | 9.94E-01   |
| rs11575321 | DDC         | 7   | 50,572,601  | 0.10             | Dom                        | 1.41 (0.78-2.57)           | 1.59 (0.92-2.73)     | 2.25 (0.77-6.57)  | 5.65E-01                         | 4.53E-01         | 9.94E-01   |
| rs915172   | EPB41L2     | 6   | 131,226,463 | 0.31             | Dom                        | 1 (0.62-1.61)              | 2.37 (1.16-4.83)     | 1.21 (0.62-2.33)  | 1.74E-01                         | 3.87E-01         | 9.94E-01   |
| rs1433318  | NCK1        | 3   | 138,149,144 | 0.31             | Add                        | 0.85 (0.58-1.25)           | 1.59 (0.82-3.09)     | 1.71 (0.96-3.03)  | 8.58E-01                         | 7.03E-01         | 9.94E-01   |
| rs10935210 | NCK1        | 3   | 138,133,843 | 0.31             | Add                        | 0.85 (0.58-1.25)           | 1.59 (0.82-3.09)     | 1.71 (0.96-3.03)  | 8.58E-01                         | 7.03E-01         | 9.94E-01   |
| rs10485058 | OPRM1       | 6   | 154,486,907 | 0.14             | Add                        | 1.01 (0.63-1.63)           | 1.65 (0.95-2.88)     | 1.73 (0.75-3.98)  | 9.27E-01                         | 9.94E-01         | 9.94E-01   |
| rs613355   | OPRM1       | 6   | 154,491,542 | 0.35             | Dom                        | 0.82 (0.57-1.17)           | 2.1 (1.03-4.32)      | 1.37 (0.71-2.64)  | 4.10E-01                         | 3.12E-01         | 9.94E-01   |
| rs3025388  | DBH         | 9   | 135,493,077 | 0.16             | Add                        | 0.66 (0.39-1.12)           | 1.8 (1.02-3.18)      | 1.54 (0.6-3.91)   | 7.73E-01                         | 2.57E-01         | 9.94E-01   |
| rs806381   | CNR1        | 6   | 88,922,620  | 0.34             | Add                        | 0.84 (0.58-1.21)           | 1.32 (0.68-2.58)     | 1.88 (1.08-3.28)  | 3.49E-01                         | 4.62E-01         | 9.94E-01   |
| rs11772714 | DDC         | 7   | 50,510,337  | 0.20             | Add                        | 1.24 (0.82-1.88)           | 1.83 (1-3.33)        | 1.43 (0.72-2.82)  | 5.66E-01                         | 5.51E-01         | 9.94E-01   |
| rs10064525 | SLC6A3      | 5   | 1,445,721   | 0.06             | Dom                        | 0.57 (0.24-1.37)           | 1.69 (1.02-2.81)     | 2.43 (0.43-13.66) | 6.91E-01                         | 4.12E-01         | 9.94E-01   |
| rs17059736 | EPB41L2     | 6   | 131,232,531 | 0.12             | Dom                        | 0.79 (0.44-1.42)           | 1.85 (1.07-3.19)     | 1.13 (0.4-3.2)    | 4.15E-01                         | 4.88E-01         | 9.94E-01   |
| rs10457561 | EPB41L2     | 6   | 131,223,025 | 0.16             | Add                        | 1.05 (0.66-1.67)           | 1.69 (0.96-2.99)     | 1.61 (0.73-3.52)  | 9.14E-01                         | 9.73E-01         | 9.94E-01   |
| rs2236610  | CLIC6       | 21  | 34,982,538  | 0.16             | Dom                        | 0.81 (0.47-1.39)           | 1.88 (1.05-3.35)     | 1.17 (0.47-2.96)  | 3.99E-01                         | 4.79E-01         | 9.95E-01   |
| rs1228814  | HTR1B       | 6   | 78,230,539  | 0.43             | Add                        | 1.02 (0.71-1.47)           | 1.11 (0.5-2.46)      | 1.93 (1.16-3.23)  | 1.36E-01                         | 3.14E-01         | 9.95E-01   |
| rs7868148  | FREQ (NCS1) | 9   | 132,043,755 | 0.27             | Add                        | 0.97 (0.66-1.43)           | 1.17 (0.62-2.2)      | 2.23 (1.21-4.09)  | 1.04E-01                         | 2.59E-01         | 9.95E-01   |
| rs835648   | NCK1        | 3   | 138,154,194 | 0.30             | Add                        | 0.86 (0.59-1.27)           | 1.57 (0.81-3.02)     | 1.73 (0.96-3.1)   | 8.07E-01                         | 7.47E-01         | 9.95E-01   |
| rs11564767 | SLC6A3      | 5   | 1,457,704   | 0.06             | Dom                        | 0.72 (0.31-1.67)           | 1.55 (0.94-2.58)     | 3.32 (0.63-17.61) | 3.93E-01                         | 5.83E-01         | 9.95E-01   |
| rs9837990  | NCK1        | 3   | 138,115,626 | 0.39             | Dom                        | 0.79 (0.48-1.29)           | 1.96 (0.91-4.22)     | 1.53 (0.83-2.85)  | 6.29E-01                         | 5.38E-01         | 9.95E-01   |
| rs806379   | CNR1        | 6   | 88,917,986  | 0.50             | Add                        | 0.86 (0.62-1.2)            | 1.45 (0.65-3.2)      | 1.67 (1.03-2.72)  | 6.67E-01                         | 6.26E-01         | 9.95E-01   |
| rs12054220 | NCK1        | 3   | 138,160,271 | 0.49             | Dom                        | 1.25 (0.72-2.17)           | 1.22 (0.47-3.19)     | 1.82 (1.03-3.19)  | 4.87E-01                         | 5.54E-01         | 9.95E-01   |

**Supplemental Table 2: SNP-Specific Results for Abstinence Rates at 6-Month Follow-up**

| SNP        | Gene    | Chr | Position    | MAF <sup>a</sup> | Genetic Model <sup>b</sup> | SNP Odds Ratio<br>(95% CI) | Treatment Odds Ratio |                   | Test of Interaction <sup>c</sup> | LRT <sup>d</sup> |            |
|------------|---------|-----|-------------|------------------|----------------------------|----------------------------|----------------------|-------------------|----------------------------------|------------------|------------|
|            |         |     |             |                  |                            |                            | WT (95% CI)          | Variant (95% CI)  |                                  | Observed P       | Adjusted P |
| rs9881139  | NCK1    | 3   | 138,116,730 | 0.39             | Add                        | 0.84 (0.59-1.2)            | 1.53 (0.75-3.12)     | 1.73 (1.03-2.9)   | 7.44E-01                         | 6.11E-01         | 9.95E-01   |
| rs2105250  | EPB41L2 | 6   | 131,325,875 | 0.27             | Dom                        | 0.8 (0.49-1.32)            | 1.37 (0.73-2.59)     | 2.47 (1.12-5.44)  | 2.56E-01                         | 4.13E-01         | 9.95E-01   |
| rs7924316  | TH      | 11  | 2,130,023   | 0.48             | Dom                        | 0.86 (0.51-1.45)           | 1.04 (0.44-2.47)     | 2.02 (1.12-3.64)  | 2.12E-01                         | 4.12E-01         | 9.95E-01   |
| rs11043001 | TH      | 11  | 2,159,621   | 0.15             | Dom                        | 0.95 (0.55-1.64)           | 1.39 (0.8-2.44)      | 2.66 (1.03-6.88)  | 2.50E-01                         | 5.09E-01         | 9.95E-01   |
| rs16956223 | CHRNA7  | 15  | 30,198,075  | 0.17             | Add                        | 0.68 (0.41-1.11)           | 1.69 (0.97-2.95)     | 1.58 (0.67-3.76)  | 8.96E-01                         | 2.58E-01         | 9.95E-01   |
| rs632395   | OPRM1   | 6   | 154,478,944 | 0.10             | Add                        | 0.86 (0.49-1.51)           | 1.93 (1.13-3.3)      | 0.9 (0.32-2.5)    | 1.83E-01                         | 3.68E-01         | 9.95E-01   |
| rs563649   | OPRM1   | 6   | 154,449,660 | 0.09             | Add                        | 0.81 (0.43-1.54)           | 1.44 (0.86-2.41)     | 3.42 (1.02-11.49) | 1.91E-01                         | 3.50E-01         | 9.95E-01   |
| rs2737015  | SNCA    | 4   | 90,964,306  | 0.27             | Dom                        | 0.81 (0.5-1.31)            | 1.44 (0.76-2.73)     | 2.02 (0.96-4.23)  | 5.02E-01                         | 5.82E-01         | 9.95E-01   |
| rs5759593  | GNAZ    | 22  | 21,794,457  | 0.41             | Add                        | 1.06 (0.77-1.47)           | 1.68 (0.81-3.49)     | 1.67 (1.02-2.73)  | 9.80E-01                         | 9.32E-01         | 9.95E-01   |
| rs988749   | EPB41L2 | 6   | 131,201,181 | 0.29             | Add                        | 0.8 (0.55-1.17)            | 1.47 (0.79-2.74)     | 1.93 (1.05-3.57)  | 4.84E-01                         | 4.15E-01         | 9.95E-01   |
| rs6859392  | HTR1A   | 5   | 63,277,237  | 0.30             | Add                        | 1.07 (0.67-1.73)           | 1.64 (0.86-3.12)     | 1.7 (0.95-3.03)   | 9.33E-01                         | 9.56E-01         | 9.95E-01   |
| rs2583981  | SNCA    | 4   | 90,971,605  | 0.27             | Dom                        | 0.81 (0.5-1.31)            | 1.44 (0.76-2.73)     | 2.02 (0.96-4.23)  | 5.02E-01                         | 5.82E-01         | 9.95E-01   |
| rs13148411 | SNCA    | 4   | 90,969,745  | 0.27             | Dom                        | 0.81 (0.5-1.31)            | 1.44 (0.76-2.73)     | 2.02 (0.96-4.23)  | 5.02E-01                         | 5.82E-01         | 9.95E-01   |
| rs6356     | TH      | 11  | 2,147,527   | 0.36             | Dom                        | 1.4 (0.85-2.31)            | 1.89 (0.83-4.28)     | 1.51 (0.83-2.74)  | 6.66E-01                         | 4.01E-01         | 9.95E-01   |
| rs267400   | DRD1    | 5   | 174,815,305 | 0.43             | Dom                        | 1.11 (0.67-1.85)           | 1.42 (0.61-3.31)     | 1.78 (0.99-3.21)  | 6.66E-01                         | 8.10E-01         | 9.96E-01   |
| rs6532191  | SNCA    | 4   | 90,964,953  | 0.50             | Add                        | 0.96 (0.68-1.35)           | 1.3 (0.56-3.04)      | 1.66 (1.02-2.68)  | 5.02E-01                         | 7.89E-01         | 9.96E-01   |
| rs1853384  | OPRM1   | 6   | 154,466,651 | 0.35             | Dom                        | 0.8 (0.5-1.3)              | 2.08 (1.02-4.26)     | 1.38 (0.72-2.66)  | 4.10E-01                         | 4.22E-01         | 9.96E-01   |
| rs10011157 | SNCA    | 4   | 90,969,867  | 0.23             | Dom                        | 1.2 (0.74-1.95)            | 1.96 (1.02-3.74)     | 1.43 (0.68-2.99)  | 5.33E-01                         | 6.68E-01         | 9.96E-01   |
| rs618207   | OPRM1   | 6   | 154,466,362 | 0.35             | Dom                        | 0.8 (0.5-1.3)              | 2.08 (1.02-4.26)     | 1.38 (0.72-2.66)  | 4.10E-01                         | 4.22E-01         | 9.96E-01   |
| rs9818792  | NCK1    | 3   | 138,072,010 | 0.31             | Add                        | 0.86 (0.58-1.26)           | 1.6 (0.82-3.1)       | 1.67 (0.94-2.98)  | 9.05E-01                         | 7.24E-01         | 9.96E-01   |
| rs1107470  | CLIC6   | 21  | 35,021,758  | 0.21             | Dom                        | 1.03 (0.63-1.69)           | 1.41 (0.77-2.59)     | 2.21 (0.99-4.95)  | 3.83E-01                         | 6.59E-01         | 9.96E-01   |
| rs4460839  | DRD2    | 11  | 112,827,006 | 0.09             | Dom                        | 1.01 (0.53-1.93)           | 1.96 (1.14-3.36)     | 0.75 (0.23-2.42)  | 1.44E-01                         | 3.35E-01         | 9.96E-01   |
| rs735421   | CHRNA2  | 8   | 27,375,209  | 0.30             | Dom                        | 1.09 (0.67-1.78)           | 1.67 (0.82-3.39)     | 1.69 (0.87-3.3)   | 9.76E-01                         | 9.37E-01         | 9.96E-01   |
| rs6026567  | GNAS    | 20  | 56,878,310  | 0.41             | Dom                        | 0.99 (0.7-1.41)            | 1.53 (0.66-3.53)     | 1.72 (0.95-3.11)  | 4.17E-01                         | 7.16E-01         | 9.96E-01   |
| rs12895068 | CALM1   | 14  | 89,957,031  | 0.07             | Add                        | 0.87 (0.46-1.65)           | 1.75 (1.05-2.93)     | 1.25 (0.38-4.15)  | 6.06E-01                         | 7.75E-01         | 9.96E-01   |
| rs234623   | GNAS    | 20  | 56,922,359  | 0.48             | Dom                        | 1.31 (0.72-2.38)           | 3.1 (1.03-9.28)      | 1.41 (0.82-2.43)  | 2.09E-01                         | 3.63E-01         | 9.96E-01   |
| rs9370399  | HCRTR2  | 6   | 55,152,984  | 0.45             | Add                        | 1.01 (0.73-1.41)           | 1.67 (0.77-3.59)     | 1.66 (1.02-2.69)  | 9.85E-01                         | 9.96E-01         | 9.96E-01   |
| rs2519765  | DBH     | 9   | 135,484,246 | 0.32             | Add                        | 0.83 (0.56-1.22)           | 2.18 (1.1-4.31)      | 1.35 (0.76-2.42)  | 2.39E-01                         | 2.67E-01         | 9.96E-01   |
| rs3788332  | MAPK1   | 22  | 20,501,567  | 0.46             | Add                        | 1 (0.71-1.4)               | 1.91 (0.87-4.18)     | 1.63 (1-2.64)     | 6.43E-01                         | 8.95E-01         | 9.96E-01   |
| rs7648198  | NCK1    | 3   | 138,154,451 | 0.47             | Dom                        | 0.92 (0.54-1.56)           | 2.27 (0.91-5.67)     | 1.46 (0.83-2.58)  | 4.24E-01                         | 6.61E-01         | 9.96E-01   |
| rs1392808  | CHRNA7  | 15  | 30,198,807  | 0.17             | Add                        | 0.68 (0.42-1.11)           | 1.69 (0.97-2.95)     | 1.56 (0.66-3.71)  | 8.74E-01                         | 2.67E-01         | 9.96E-01   |
| rs10438342 | CHRNA7  | 15  | 30,189,338  | 0.38             | Add                        | 0.79 (0.56-1.12)           | 1.9 (0.95-3.8)       | 1.55 (0.92-2.61)  | 5.73E-01                         | 3.29E-01         | 9.96E-01   |
| rs2652511  | SLC6A3  | 5   | 1,499,389   | 0.39             | Add                        | 1.14 (0.8-1.63)            | 2.29 (1.07-4.9)      | 1.54 (0.93-2.56)  | 2.74E-01                         | 4.43E-01         | 9.96E-01   |
| rs9392     | CREBBP  | 16  | 3,715,170   | 0.22             | Add                        | 1.06 (0.7-1.61)            | 1.86 (1.01-3.43)     | 1.43 (0.74-2.78)  | 5.38E-01                         | 8.01E-01         | 9.96E-01   |
| rs8136867  | MAPK1   | 22  | 20,534,793  | 0.44             | Dom                        | 0.94 (0.56-1.57)           | 1.86 (0.8-4.33)      | 1.56 (0.87-2.81)  | 7.35E-01                         | 9.08E-01         | 9.96E-01   |
| rs3810614  | GNAZ    | 22  | 21,767,271  | 0.29             | Add                        | 1.26 (0.87-1.82)           | 1.62 (0.82-3.2)      | 1.76 (0.98-3.14)  | 8.39E-01                         | 4.41E-01         | 9.96E-01   |
| rs6517254  | CLIC6   | 21  | 35,002,160  | 0.38             | Dom                        | 0.75 (0.46-1.21)           | 1.88 (0.9-3.95)      | 1.58 (0.83-3.01)  | 7.27E-01                         | 4.43E-01         | 9.96E-01   |
| rs129963   | CREBBP  | 16  | 3,736,148   | 0.44             | Dom                        | 1.23 (0.72-2.09)           | 1.96 (0.79-4.85)     | 1.55 (0.88-2.73)  | 6.69E-01                         | 7.07E-01         | 9.96E-01   |
| rs8135665  | PRKCABP | 22  | 36,806,222  | 0.20             | Add                        | 1.25 (0.75-2.07)           | 1.98 (1.07-3.68)     | 1.46 (0.75-2.84)  | 6.51E-01                         | 6.59E-01         | 9.96E-01   |

**Supplemental Table 2: SNP-Specific Results for Abstinence Rates at 6-Month Follow-up**

| SNP        | Gene        | Chr | Position    | MAF <sup>a</sup> | Genetic Model <sup>b</sup> | SNP Odds Ratio<br>(95% CI) | Treatment Odds Ratio |                  | Test of Interaction <sup>c</sup> | LRT <sup>d</sup> |            |
|------------|-------------|-----|-------------|------------------|----------------------------|----------------------------|----------------------|------------------|----------------------------------|------------------|------------|
|            |             |     |             |                  |                            |                            | WT (95% CI)          | Variant (95% CI) |                                  | Observed P       | Adjusted P |
| rs9845460  | NCK1        | 3   | 138,069,807 | 0.24             | Dom                        | 0.8 (0.53-1.22)            | 1.74 (0.93-3.25)     | 1.54 (0.72-3.29) | 7.26E-01                         | 5.47E-01         | 9.96E-01   |
| rs2834604  | CLIC6       | 21  | 35,014,932  | 0.34             | Add                        | 0.81 (0.54-1.2)            | 1.97 (0.97-3.98)     | 1.52 (0.86-2.65) | 5.25E-01                         | 4.12E-01         | 9.97E-01   |
| rs129968   | CREBBP      | 16  | 3,731,262   | 0.35             | Add                        | 0.98 (0.67-1.42)           | 2.35 (1.12-4.94)     | 1.48 (0.87-2.54) | 2.32E-01                         | 4.68E-01         | 9.97E-01   |
| rs965808   | GNAS        | 20  | 56,841,821  | 0.24             | Dom                        | 0.98 (0.61-1.6)            | 1.63 (0.87-3.08)     | 1.68 (0.8-3.53)  | 9.53E-01                         | 9.97E-01         | 9.97E-01   |
| rs2236081  | EPB41L2     | 6   | 131,196,716 | 0.28             | Dom                        | 1.22 (0.76-1.98)           | 2.19 (1.08-4.46)     | 1.29 (0.67-2.5)  | 2.85E-01                         | 4.42E-01         | 9.97E-01   |
| rs8125112  | GNAS        | 20  | 56,864,560  | 0.16             | Dom                        | 0.96 (0.54-1.7)            | 1.34 (0.75-2.39)     | 2.92 (1.06-8.05) | 1.92E-01                         | 4.04E-01         | 9.97E-01   |
| rs6761993  | NCK1        | 3   | 138,108,592 | 0.39             | Add                        | 0.85 (0.6-1.2)             | 1.52 (0.75-3.09)     | 1.69 (1.01-2.84) | 7.68E-01                         | 6.32E-01         | 9.97E-01   |
| rs10244632 | DDC         | 7   | 50,566,197  | 0.27             | Add                        | 1.1 (0.76-1.6)             | 1.36 (0.71-2.61)     | 1.98 (1.09-3.59) | 3.34E-01                         | 5.17E-01         | 9.97E-01   |
| rs3735275  | DDC         | 7   | 50,484,765  | 0.17             | Add                        | 1.29 (0.83-1.98)           | 1.7 (0.96-3.04)      | 1.56 (0.75-3.24) | 8.38E-01                         | 5.30E-01         | 9.97E-01   |
| rs3134710  | HCRTR2      | 6   | 55,190,420  | 0.26             | Add                        | 0.74 (0.49-1.12)           | 1.93 (1.04-3.58)     | 1.41 (0.73-2.72) | 4.60E-01                         | 2.46E-01         | 9.97E-01   |
| rs9357853  | HCRTR2      | 6   | 55,213,660  | 0.26             | Add                        | 0.74 (0.49-1.11)           | 1.9 (1.03-3.5)       | 1.43 (0.75-2.74) | 4.98E-01                         | 2.44E-01         | 9.97E-01   |
| rs12130351 | EPB41       | 1   | 29,269,534  | 0.07             | Dom                        | 1.51 (0.77-2.96)           | 1.59 (0.94-2.67)     | 2.04 (0.58-7.21) | 7.16E-01                         | 4.27E-01         | 9.97E-01   |
| rs1004764  | PRKCABP     | 22  | 36,804,798  | 0.39             | Dom                        | 1.08 (0.65-1.79)           | 2.37 (1.03-5.45)     | 1.36 (0.75-2.47) | 2.91E-01                         | 5.63E-01         | 9.97E-01   |
| rs10891556 | DRD2        | 11  | 112,857,971 | 0.17             | Add                        | 1.1 (0.7-1.74)             | 1.53 (0.86-2.74)     | 1.84 (0.85-3.96) | 6.99E-01                         | 8.19E-01         | 9.97E-01   |
| rs540825   | OPRM1       | 6   | 154,456,139 | 0.25             | Add                        | 0.8 (0.54-1.19)            | 1.8 (0.99-3.27)      | 1.57 (0.81-3.04) | 7.40E-01                         | 4.51E-01         | 9.97E-01   |
| rs9353524  | CNR1        | 6   | 88,894,335  | 0.21             | Dom                        | 0.99 (0.61-1.63)           | 1.51 (0.82-2.77)     | 1.91 (0.86-4.23) | 6.44E-01                         | 8.98E-01         | 9.97E-01   |
| rs10268819 | DDC         | 7   | 50,577,565  | 0.12             | Add                        | 1.35 (0.8-2.3)             | 1.65 (0.92-2.94)     | 2.06 (0.81-5.27) | 6.83E-01                         | 4.54E-01         | 9.97E-01   |
| rs6064714  | GNAS        | 20  | 56,847,535  | 0.15             | Add                        | 0.72 (0.43-1.21)           | 1.48 (0.86-2.55)     | 2.42 (0.94-6.26) | 3.64E-01                         | 3.39E-01         | 9.97E-01   |
| rs4436578  | DRD2        | 11  | 112,811,975 | 0.12             | Add                        | 1.41 (0.88-2.25)           | 1.62 (0.93-2.8)      | 1.9 (0.83-4.32)  | 7.38E-01                         | 3.55E-01         | 9.97E-01   |
| rs2834603  | CLIC6       | 21  | 35,014,793  | 0.07             | Dom                        | 0.82 (0.38-1.77)           | 1.58 (0.95-2.62)     | 2.27 (0.52-9.86) | 6.45E-01                         | 7.74E-01         | 9.97E-01   |
| rs11088294 | CLIC6       | 21  | 35,020,213  | 0.25             | Dom                        | 0.73 (0.45-1.2)            | 1.65 (0.89-3.07)     | 1.73 (0.8-3.74)  | 9.27E-01                         | 4.58E-01         | 9.97E-01   |
| rs2251838  | PRKAR2B     | 7   | 106,507,403 | 0.34             | Dom                        | 1.34 (0.82-2.19)           | 1.33 (0.62-2.85)     | 1.85 (0.99-3.46) | 5.10E-01                         | 3.69E-01         | 9.97E-01   |
| rs2834600  | CLIC6       | 21  | 35,007,972  | 0.15             | Dom                        | 1.31 (0.78-2.21)           | 1.57 (0.88-2.79)     | 1.76 (0.71-4.34) | 8.31E-01                         | 5.52E-01         | 9.97E-01   |
| rs9349768  | HCRTR2      | 6   | 55,199,409  | 0.22             | Add                        | 0.74 (0.48-1.13)           | 1.87 (1.04-3.37)     | 1.35 (0.66-2.77) | 4.62E-01                         | 2.59E-01         | 9.97E-01   |
| rs2834587  | CLIC6       | 21  | 34,986,503  | 0.34             | Dom                        | 0.86 (0.53-1.39)           | 1.89 (0.91-3.89)     | 1.53 (0.8-2.94)  | 6.78E-01                         | 7.40E-01         | 9.97E-01   |
| rs3819041  | CLIC6       | 21  | 35,003,496  | 0.42             | Add                        | 1.19 (0.86-1.66)           | 1.58 (0.74-3.4)      | 1.67 (1.03-2.71) | 8.78E-01                         | 5.49E-01         | 9.97E-01   |
| rs9357850  | HCRTR2      | 6   | 55,204,783  | 0.22             | Add                        | 0.74 (0.48-1.13)           | 1.87 (1.04-3.37)     | 1.35 (0.66-2.77) | 4.62E-01                         | 2.59E-01         | 9.97E-01   |
| rs4947510  | DDC         | 7   | 50,492,914  | 0.29             | Add                        | 1.18 (0.83-1.68)           | 1.51 (0.79-2.89)     | 1.78 (1.02-3.09) | 6.56E-01                         | 5.79E-01         | 9.97E-01   |
| rs2012859  | PRKCABP     | 22  | 36,803,652  | 0.30             | Dom                        | 0.82 (0.51-1.32)           | 1.48 (0.77-2.87)     | 1.91 (0.94-3.86) | 6.10E-01                         | 6.54E-01         | 9.98E-01   |
| rs1057137  | CHRNA2      | 8   | 27,373,362  | 0.40             | Dom                        | 1.21 (0.72-2.02)           | 2.64 (1.12-6.25)     | 1.37 (0.76-2.47) | 2.17E-01                         | 4.01E-01         | 9.98E-01   |
| rs11575453 | DDC         | 7   | 50,515,359  | 0.08             | Add                        | 0.94 (0.5-1.79)            | 1.57 (0.93-2.66)     | 2.1 (0.64-6.91)  | 6.63E-01                         | 9.04E-01         | 9.98E-01   |
| rs1812923  | SNCA        | 4   | 90,958,562  | 0.43             | Dom                        | 0.85 (0.51-1.42)           | 1.29 (0.55-3.01)     | 1.86 (1.04-3.35) | 4.87E-01                         | 6.81E-01         | 9.98E-01   |
| rs6938321  | CNR1        | 6   | 88,892,773  | 0.12             | Dom                        | 0.83 (0.46-1.49)           | 1.82 (1.05-3.13)     | 1.19 (0.42-3.37) | 4.79E-01                         | 6.12E-01         | 9.98E-01   |
| rs876259   | CALM1       | 14  | 89,952,709  | 0.07             | Add                        | 0.9 (0.47-1.73)            | 1.75 (1.05-2.94)     | 1.2 (0.35-4.07)  | 5.68E-01                         | 7.78E-01         | 9.98E-01   |
| rs3788337  | GNAZ        | 22  | 21,742,017  | 0.35             | Dom                        | 0.8 (0.49-1.29)            | 1.3 (0.65-2.59)      | 2.03 (1.02-4.02) | 3.68E-01                         | 4.73E-01         | 9.98E-01   |
| rs12154324 | PRKAR2B     | 7   | 106,508,168 | 0.09             | Add                        | 0.97 (0.54-1.76)           | 1.84 (1.09-3.12)     | 1.01 (0.34-3.03) | 3.25E-01                         | 6.10E-01         | 9.98E-01   |
| rs4820537  | GNAZ        | 22  | 21,794,810  | 0.47             | Dom                        | 0.98 (0.58-1.65)           | 2.37 (0.97-5.8)      | 1.42 (0.8-2.52)  | 3.45E-01                         | 6.18E-01         | 9.98E-01   |
| rs1017112  | FREQ (NCS1) | 9   | 131,976,625 | 0.17             | Add                        | 0.89 (0.56-1.41)           | 1.26 (0.72-2.22)     | 2.72 (1.21-6.08) | 1.06E-01                         | 2.48E-01         | 9.98E-01   |
| rs5326     | DRD1        | 5   | 174,802,802 | 0.13             | Dom                        | 0.98 (0.55-1.71)           | 1.49 (0.86-2.58)     | 2.36 (0.86-6.43) | 4.31E-01                         | 7.29E-01         | 9.98E-01   |

**Supplemental Table 2: SNP-Specific Results for Abstinence Rates at 6-Month Follow-up**

| SNP        | Gene    | Chr | Position    | MAF <sup>a</sup> | Genetic Model <sup>b</sup> | SNP Odds Ratio<br>(95% CI) | Treatment Odds Ratio |                  | Test of Interaction <sup>c</sup> | LRT <sup>d</sup> |            |
|------------|---------|-----|-------------|------------------|----------------------------|----------------------------|----------------------|------------------|----------------------------------|------------------|------------|
|            |         |     |             |                  |                            |                            | WT (95% CI)          | Variant (95% CI) |                                  | Observed P       | Adjusted P |
| rs8046065  | CREBBP  | 16  | 3,778,299   | 0.11             | Dom                        | 0.79 (0.44-1.42)           | 1.59 (0.93-2.73)     | 1.98 (0.67-5.86) | 7.35E-01                         | 7.10E-01         | 9.98E-01   |
| rs2440390  | DRD2    | 11  | 112,792,088 | 0.14             | Dom                        | 0.68 (0.37-1.22)           | 1.71 (0.99-2.95)     | 1.36 (0.48-3.86) | 7.04E-01                         | 3.80E-01         | 9.98E-01   |
| rs891399   | CHRNA2  | 8   | 27,381,340  | 0.13             | Add                        | 0.94 (0.57-1.57)           | 1.46 (0.85-2.52)     | 2.38 (0.94-5.98) | 3.58E-01                         | 6.44E-01         | 9.98E-01   |
| rs4074181  | HCRTR2  | 6   | 55,211,426  | 0.22             | Add                        | 0.75 (0.49-1.15)           | 1.89 (1.05-3.41)     | 1.32 (0.65-2.71) | 4.18E-01                         | 2.68E-01         | 9.98E-01   |
| rs3842748  | TH      | 11  | 2,137,971   | 0.22             | Add                        | 0.88 (0.57-1.37)           | 1.99 (1.06-3.73)     | 1.36 (0.67-2.79) | 4.04E-01                         | 5.59E-01         | 9.98E-01   |
| rs7178176  | CHRNA7  | 15  | 30,231,105  | 0.24             | Dom                        | 1.04 (0.7-1.54)            | 1.77 (0.93-3.37)     | 1.52 (0.74-3.13) | 4.74E-01                         | 7.73E-01         | 9.98E-01   |
| rs7164518  | CHRNA7  | 15  | 30,249,900  | 0.17             | Add                        | 0.9 (0.56-1.45)            | 1.48 (0.83-2.63)     | 1.77 (0.78-4.02) | 7.16E-01                         | 8.81E-01         | 9.98E-01   |
| rs2565062  | CHRNA2  | 8   | 27,381,857  | 0.13             | Add                        | 0.95 (0.57-1.58)           | 1.47 (0.85-2.53)     | 2.38 (0.95-5.99) | 3.64E-01                         | 6.51E-01         | 9.98E-01   |
| rs2186287  | CLIC6   | 21  | 34,990,935  | 0.34             | Add                        | 0.84 (0.57-1.22)           | 1.8 (0.91-3.58)      | 1.51 (0.86-2.67) | 6.61E-01                         | 5.62E-01         | 9.98E-01   |
| rs9612234  | GNAZ    | 22  | 21,797,080  | 0.44             | Add                        | 1.04 (0.75-1.45)           | 1.51 (0.7-3.24)      | 1.68 (1.03-2.73) | 7.44E-01                         | 9.11E-01         | 9.98E-01   |
| rs257384   | PRKAR2B | 7   | 106,592,630 | 0.45             | Dom                        | 1.14 (0.68-1.93)           | 1.09 (0.45-2.65)     | 1.98 (1.11-3.51) | 2.71E-01                         | 4.49E-01         | 9.98E-01   |
| rs7803247  | DDC     | 7   | 50,508,237  | 0.42             | Add                        | 1.15 (0.83-1.61)           | 1.52 (0.71-3.24)     | 1.67 (1.03-2.72) | 7.75E-01                         | 6.51E-01         | 9.98E-01   |
| rs6015389  | GNAS    | 20  | 56,860,121  | 0.36             | Add                        | 0.88 (0.61-1.26)           | 1.15 (0.58-2.28)     | 1.86 (1.07-3.21) | 1.93E-01                         | 3.46E-01         | 9.98E-01   |
| rs9612237  | GNAZ    | 22  | 21,802,954  | 0.44             | Add                        | 1.04 (0.75-1.45)           | 1.42 (0.67-3.04)     | 1.69 (1.04-2.74) | 6.15E-01                         | 8.46E-01         | 9.98E-01   |
| rs2741339  | CHRNA2  | 8   | 27,390,886  | 0.27             | Add                        | 1.24 (0.86-1.79)           | 1.58 (0.82-3.03)     | 1.79 (1.02-3.16) | 7.38E-01                         | 4.53E-01         | 9.98E-01   |
| rs3788339  | GNAZ    | 22  | 21,747,677  | 0.13             | Dom                        | 1.21 (0.69-2.12)           | 1.57 (0.9-2.74)      | 1.83 (0.68-4.94) | 7.93E-01                         | 7.26E-01         | 9.98E-01   |
| rs2486200  | EPB41   | 1   | 29,236,572  | 0.23             | Dom                        | 0.8 (0.48-1.33)            | 1.39 (0.76-2.52)     | 2.38 (1.02-5.54) | 3.09E-01                         | 4.66E-01         | 9.98E-01   |
| rs3798249  | EPB41L2 | 6   | 131,249,136 | 0.48             | Add                        | 0.91 (0.66-1.26)           | 2.39 (1.09-5.28)     | 1.69 (1.04-2.75) | 2.96E-01                         | 4.48E-01         | 9.98E-01   |
| rs3122167  | HCRTR2  | 6   | 55,220,774  | 0.28             | Add                        | 0.75 (0.51-1.1)            | 1.81 (0.97-3.37)     | 1.52 (0.82-2.81) | 6.61E-01                         | 2.74E-01         | 9.98E-01   |
| rs717099   | PRKAR2B | 7   | 106,528,174 | 0.46             | Dom                        | 0.87 (0.52-1.46)           | 2.65 (1.12-6.26)     | 1.37 (0.77-2.46) | 2.15E-01                         | 3.84E-01         | 9.98E-01   |
| rs9426306  | EPB41   | 1   | 29,261,001  | 0.13             | Dom                        | 0.84 (0.46-1.54)           | 1.44 (0.84-2.47)     | 2.89 (0.95-8.78) | 2.70E-01                         | 5.01E-01         | 9.99E-01   |
| rs2985329  | EPB41   | 1   | 29,206,549  | 0.13             | Dom                        | 0.84 (0.46-1.54)           | 1.44 (0.84-2.47)     | 2.89 (0.95-8.78) | 2.70E-01                         | 5.01E-01         | 9.99E-01   |
| rs2619372  | SNCA    | 4   | 90,955,750  | 0.29             | Add                        | 1.15 (0.8-1.66)            | 1.97 (1-3.89)        | 1.52 (0.87-2.64) | 4.93E-01                         | 6.58E-01         | 9.99E-01   |
| rs2737020  | SNCA    | 4   | 90,959,901  | 0.29             | Add                        | 1.15 (0.8-1.66)            | 1.97 (1-3.89)        | 1.52 (0.87-2.64) | 4.93E-01                         | 6.58E-01         | 9.99E-01   |
| rs2788888  | EPB41   | 1   | 29,252,579  | 0.23             | Dom                        | 0.8 (0.48-1.34)            | 1.4 (0.77-2.54)      | 2.38 (1.02-5.54) | 3.15E-01                         | 4.76E-01         | 9.99E-01   |
| rs2153165  | EPB41   | 1   | 29,258,073  | 0.23             | Dom                        | 0.8 (0.48-1.34)            | 1.4 (0.77-2.54)      | 2.38 (1.02-5.54) | 3.15E-01                         | 4.76E-01         | 9.99E-01   |
| rs2834605  | CLIC6   | 21  | 35,019,400  | 0.14             | Add                        | 1.2 (0.7-2.04)             | 1.5 (0.85-2.66)      | 2.01 (0.8-5.07)  | 6.01E-01                         | 6.31E-01         | 9.99E-01   |
| rs3735757  | CHRNA2  | 8   | 27,377,514  | 0.14             | Add                        | 0.87 (0.52-1.45)           | 1.52 (0.88-2.64)     | 2.28 (0.9-5.76)  | 4.48E-01                         | 6.80E-01         | 9.99E-01   |
| rs9624019  | GNAZ    | 22  | 21,737,301  | 0.10             | Add                        | 1.07 (0.58-1.96)           | 1.49 (0.88-2.54)     | 2.43 (0.78-7.56) | 4.37E-01                         | 6.47E-01         | 9.99E-01   |
| rs2834578  | CLIC6   | 21  | 34,981,479  | 0.41             | Dom                        | 1.21 (0.87-1.68)           | 2.1 (0.92-4.82)      | 1.45 (0.8-2.62)  | 9.50E-01                         | 5.21E-01         | 9.99E-01   |
| rs6955387  | PRKAR2B | 7   | 106,535,275 | 0.39             | Dom                        | 0.84 (0.51-1.37)           | 2.19 (1.02-4.73)     | 1.42 (0.77-2.64) | 3.90E-01                         | 5.02E-01         | 9.99E-01   |
| rs12072831 | EPB41   | 1   | 29,265,747  | 0.15             | Dom                        | 0.81 (0.45-1.47)           | 1.44 (0.84-2.49)     | 2.85 (0.96-8.49) | 2.74E-01                         | 4.89E-01         | 9.99E-01   |
| rs4810148  | GNAS    | 20  | 56,881,306  | 0.34             | Add                        | 1.02 (0.71-1.48)           | 1.45 (0.72-2.93)     | 1.77 (1.04-3.03) | 6.00E-01                         | 8.55E-01         | 9.99E-01   |
| rs4364482  | HCRTR2  | 6   | 55,148,947  | 0.18             | Dom                        | 0.91 (0.54-1.53)           | 1.27 (0.71-2.28)     | 2.93 (1.2-7.15)  | 1.24E-01                         | 2.93E-01         | 9.99E-01   |
| rs2834586  | CLIC6   | 21  | 34,986,352  | 0.18             | Dom                        | 0.9 (0.54-1.51)            | 1.88 (1.05-3.38)     | 1.27 (0.55-2.97) | 4.58E-01                         | 6.79E-01         | 9.99E-01   |
| rs4936270  | DRD2    | 11  | 112,823,618 | 0.10             | Dom                        | 0.88 (0.46-1.68)           | 1.91 (1.11-3.29)     | 0.82 (0.26-2.59) | 1.92E-01                         | 4.04E-01         | 9.99E-01   |
| rs3801969  | PRKAR2B | 7   | 106,498,728 | 0.45             | Dom                        | 1 (0.6-1.7)                | 1.03 (0.43-2.47)     | 2.05 (1.14-3.68) | 2.03E-01                         | 4.42E-01         | 9.99E-01   |
| rs760975   | PRKCABP | 22  | 36,797,730  | 0.39             | Dom                        | 1.05 (0.63-1.74)           | 2.37 (1.03-5.45)     | 1.42 (0.78-2.6)  | 3.32E-01                         | 6.20E-01         | 9.99E-01   |
| rs4897473  | EPB41L2 | 6   | 131,256,964 | 0.35             | Add                        | 1.16 (0.82-1.64)           | 1.37 (0.68-2.77)     | 1.8 (1.07-3.02)  | 4.43E-01                         | 4.79E-01         | 9.99E-01   |



**Supplemental Table 2: SNP-Specific Results for Abstinence Rates at 6-Month Follow-up**

| SNP        | Gene        | Chr | Position    | MAF <sup>a</sup> | Genetic Model <sup>b</sup> | SNP Odds Ratio<br>(95% CI) | Treatment Odds Ratio |                  | Test of Interaction <sup>c</sup> | LRT <sup>d</sup> |            |
|------------|-------------|-----|-------------|------------------|----------------------------|----------------------------|----------------------|------------------|----------------------------------|------------------|------------|
|            |             |     |             |                  |                            |                            | WT (95% CI)          | Variant (95% CI) |                                  | Observed P       | Adjusted P |
| rs2472553  | CHRNA2      | 8   | 27,384,428  | 0.13             | Add                        | 1 (0.6-1.66)               | 1.42 (0.82-2.46)     | 2.57 (1.03-6.45) | 2.61E-01                         | 5.11E-01         | 9.99E-01   |
| rs9656135  | PRKAR2B     | 7   | 106,555,592 | 0.08             | Add                        | 0.93 (0.5-1.75)            | 1.86 (1.11-3.15)     | 0.88 (0.27-2.83) | 2.42E-01                         | 4.82E-01         | 9.99E-01   |
| rs1999474  | EPB41L2     | 6   | 131,279,395 | 0.28             | Dom                        | 0.87 (0.53-1.43)           | 1.32 (0.7-2.5)       | 2.32 (1.08-4.98) | 2.68E-01                         | 5.00E-01         | 9.99E-01   |
| rs6919007  | EPB41L2     | 6   | 131,206,179 | 0.37             | Add                        | 1.21 (0.86-1.69)           | 1.51 (0.74-3.1)      | 1.72 (1.04-2.85) | 7.14E-01                         | 4.82E-01         | 9.99E-01   |
| rs9402292  | EPB41L2     | 6   | 131,211,966 | 0.37             | Add                        | 1.21 (0.86-1.69)           | 1.51 (0.74-3.1)      | 1.72 (1.04-2.85) | 7.14E-01                         | 4.82E-01         | 9.99E-01   |
| rs13054985 | GNAZ        | 22  | 21,788,577  | 0.45             | Dom                        | 0.93 (0.56-1.55)           | 1.37 (0.58-3.21)     | 1.82 (1.01-3.26) | 5.89E-01                         | 8.43E-01         | 9.99E-01   |
| rs17340577 | PRKAR2B     | 7   | 106,506,649 | 0.08             | Dom                        | 1.16 (0.6-2.24)            | 1.69 (1-2.86)        | 1.36 (0.4-4.61)  | 7.50E-01                         | 8.73E-01         | 9.99E-01   |
| rs2068147  | EPB41L2     | 6   | 131,263,595 | 0.48             | Add                        | 0.89 (0.64-1.22)           | 2.22 (1.02-4.84)     | 1.65 (1.02-2.67) | 3.65E-01                         | 4.67E-01         | 9.99E-01   |
| rs4897472  | EPB41L2     | 6   | 131,254,831 | 0.48             | Add                        | 0.89 (0.64-1.22)           | 2.22 (1.02-4.84)     | 1.65 (1.02-2.67) | 3.65E-01                         | 4.67E-01         | 9.99E-01   |
| rs4654390  | EPB41       | 1   | 29,311,603  | 0.49             | Add                        | 0.85 (0.61-1.18)           | 1.97 (0.89-4.39)     | 1.63 (1.01-2.65) | 5.84E-01                         | 4.76E-01         | 9.99E-01   |
| rs1076153  | DBH         | 9   | 135,487,964 | 0.20             | Dom                        | 1.39 (0.85-2.28)           | 1.53 (0.82-2.85)     | 1.92 (0.88-4.2)  | 6.59E-01                         | 3.35E-01         | 9.99E-01   |
| rs4897468  | EPB41L2     | 6   | 131,206,765 | 0.37             | Add                        | 1.2 (0.86-1.69)            | 1.5 (0.74-3.08)      | 1.72 (1.04-2.86) | 6.95E-01                         | 4.90E-01         | 9.99E-01   |
| rs6479643  | DBH         | 9   | 135,504,489 | 0.38             | Add                        | 1.01 (0.72-1.42)           | 1.78 (0.87-3.65)     | 1.63 (0.98-2.71) | 8.00E-01                         | 9.68E-01         | 9.99E-01   |
| rs2734841  | ANKK1       | 11  | 112,786,986 | 0.30             | Dom                        | 1.03 (0.64-1.67)           | 2.04 (1-4.13)        | 1.38 (0.71-2.68) | 4.33E-01                         | 7.34E-01         | 9.99E-01   |
| rs7122454  | DRD2        | 11  | 112,832,678 | 0.15             | Add                        | 0.95 (0.58-1.57)           | 1.37 (0.79-2.39)     | 2.69 (1.11-6.55) | 1.95E-01                         | 4.17E-01         | 9.99E-01   |
| rs4733065  | CHRNA2      | 8   | 27,363,921  | 0.45             | Dom                        | 0.86 (0.61-1.2)            | 1.5 (0.66-3.42)      | 1.73 (0.95-3.17) | 7.49E-01                         | 6.51E-01         | 9.99E-01   |
| rs157208   | EPB41       | 1   | 29,117,993  | 0.24             | Add                        | 1.07 (0.72-1.58)           | 1.78 (0.96-3.3)      | 1.51 (0.8-2.85)  | 6.88E-01                         | 8.93E-01         | 9.99E-01   |
| rs3788341  | GNAZ        | 22  | 21,747,758  | 0.47             | Add                        | 1.12 (0.8-1.56)            | 2.06 (0.9-4.73)      | 1.67 (1.03-2.7)  | 5.40E-01                         | 7.00E-01         | 9.99E-01   |
| rs4075265  | EPB41L2     | 6   | 131,208,150 | 0.31             | Add                        | 0.88 (0.62-1.26)           | 1.49 (0.79-2.82)     | 1.82 (1.02-3.23) | 5.94E-01                         | 6.98E-01         | 9.99E-01   |
| rs2073833  | DBH         | 9   | 135,510,103 | 0.42             | Add                        | 1 (0.7-1.41)               | 1.85 (0.85-4.04)     | 1.7 (1.02-2.83)  | 8.10E-01                         | 9.69E-01         | 9.99E-01   |
| rs3829905  | FREQ (NCS1) | 9   | 132,024,932 | 0.35             | Dom                        | 1.11 (0.67-1.85)           | 2.14 (0.98-4.66)     | 1.77 (0.89-3.5)  | 7.22E-01                         | 8.82E-01         | 9.99E-01   |
| rs7867693  | FREQ (NCS1) | 9   | 132,043,625 | 0.11             | Dom                        | 0.94 (0.52-1.68)           | 2.01 (1.17-3.48)     | 0.81 (0.29-2.29) | 1.29E-01                         | 3.00E-01         | 9.99E-01   |
| rs4274224  | DRD2        | 11  | 112,824,662 | 0.45             | Dom                        | 0.79 (0.56-1.12)           | 2.35 (0.99-5.57)     | 1.41 (0.79-2.52) | 8.20E-01                         | 3.68E-01         | 9.99E-01   |
| rs10915216 | EPB41       | 1   | 29,229,250  | 0.49             | Add                        | 0.84 (0.6-1.17)            | 1.91 (0.86-4.25)     | 1.63 (1-2.64)    | 6.42E-01                         | 4.65E-01         | 9.99E-01   |
| rs4938019  | DRD2        | 11  | 112,846,601 | 0.15             | Add                        | 0.93 (0.56-1.52)           | 1.38 (0.79-2.41)     | 2.7 (1.11-6.56)  | 1.98E-01                         | 4.24E-01         | 9.99E-01   |
| rs2741335  | CHRNA2      | 8   | 27,393,708  | 0.27             | Dom                        | 1.07 (0.66-1.72)           | 1.31 (0.68-2.53)     | 2.19 (1.08-4.45) | 2.94E-01                         | 5.33E-01         | 9.99E-01   |
| rs886528   | CREBBP      | 16  | 3,751,557   | 0.47             | Dom                        | 0.95 (0.55-1.63)           | 2.19 (0.86-5.58)     | 1.47 (0.83-2.58) | 4.70E-01                         | 7.42E-01         | 9.99E-01   |
| rs2299419  | PRKAR2B     | 7   | 106,506,772 | 0.09             | Add                        | 0.88 (0.48-1.61)           | 1.85 (1.09-3.14)     | 0.96 (0.31-2.98) | 2.98E-01                         | 5.07E-01         | 9.99E-01   |
| rs2254241  | EPB41       | 1   | 29,290,620  | 0.13             | Dom                        | 0.81 (0.44-1.49)           | 1.46 (0.85-2.5)      | 2.74 (0.89-8.43) | 3.22E-01                         | 5.34E-01         | 9.99E-01   |
| rs2985335  | EPB41       | 1   | 29,218,234  | 0.13             | Dom                        | 0.82 (0.45-1.51)           | 1.46 (0.85-2.51)     | 2.79 (0.92-8.49) | 3.03E-01                         | 5.30E-01         | 9.99E-01   |
| rs3134711  | HCRTR2      | 6   | 55,211,851  | 0.28             | Add                        | 0.75 (0.51-1.11)           | 1.82 (0.97-3.39)     | 1.53 (0.82-2.84) | 6.67E-01                         | 2.96E-01         | 9.99E-01   |
| rs891398   | CHRNA2      | 8   | 27,380,739  | 0.48             | Dom                        | 1.06 (0.74-1.51)           | 1.34 (0.48-3.72)     | 1.8 (1.04-3.12)  | 2.65E-01                         | 4.60E-01         | 9.99E-01   |
| rs6569709  | EPB41L2     | 6   | 131,223,739 | 0.31             | Add                        | 0.9 (0.63-1.29)            | 1.45 (0.77-2.73)     | 1.85 (1.05-3.27) | 5.00E-01                         | 6.90E-01         | 9.99E-01   |
| rs12173930 | HTR1B       | 6   | 78,243,153  | 0.13             | Dom                        | 1.13 (0.65-1.95)           | 1.66 (0.95-2.9)      | 1.68 (0.65-4.37) | 9.82E-01                         | 9.10E-01         | 9.99E-01   |
| rs730092   | DDC         | 7   | 50,503,248  | 0.43             | Add                        | 1.14 (0.82-1.59)           | 1.52 (0.71-3.26)     | 1.68 (1.03-2.74) | 7.70E-01                         | 6.92E-01         | 9.99E-01   |
| rs7003694  | CHRNA2      | 8   | 27,403,111  | 0.09             | Add                        | 0.8 (0.43-1.48)            | 1.75 (1.04-2.94)     | 1.3 (0.4-4.16)   | 6.40E-01                         | 6.41E-01         | 9.99E-01   |
| rs806369   | CNR1        | 6   | 88,912,897  | 0.31             | Add                        | 1.04 (0.73-1.49)           | 1.77 (0.91-3.43)     | 1.6 (0.93-2.76)  | 7.82E-01                         | 9.41E-01         | 9.99E-01   |
| rs6938735  | EPB41L2     | 6   | 131,196,596 | 0.31             | Add                        | 0.88 (0.62-1.26)           | 1.52 (0.8-2.87)      | 1.8 (1.01-3.19)  | 6.47E-01                         | 7.15E-01         | 9.99E-01   |
| rs7741664  | HCRTR2      | 6   | 55,213,260  | 0.25             | Add                        | 0.76 (0.51-1.15)           | 1.91 (1.03-3.52)     | 1.41 (0.73-2.72) | 4.75E-01                         | 3.05E-01         | 9.99E-01   |

**Supplemental Table 2: SNP-Specific Results for Abstinence Rates at 6-Month Follow-up**

| SNP        | Gene        | Chr | Position    | MAF <sup>a</sup> | Genetic Model <sup>b</sup> | SNP Odds Ratio<br>(95% CI) | Treatment Odds Ratio |                  | Test of Interaction <sup>c</sup> | LRT <sup>d</sup> |            |
|------------|-------------|-----|-------------|------------------|----------------------------|----------------------------|----------------------|------------------|----------------------------------|------------------|------------|
|            |             |     |             |                  |                            |                            | WT (95% CI)          | Variant (95% CI) |                                  | Observed P       | Adjusted P |
| rs1413753  | EPB41L2     | 6   | 131,192,197 | 0.32             | Dom                        | 0.83 (0.51-1.34)           | 1.51 (0.77-2.98)     | 1.89 (0.94-3.8)  | 6.55E-01                         | 6.97E-01         | 9.99E-01   |
| rs150089   | EPB41       | 1   | 29,131,901  | 0.32             | Add                        | 1.03 (0.64-1.67)           | 1.78 (0.91-3.47)     | 1.59 (0.92-2.76) | 6.04E-01                         | 8.58E-01         | 9.99E-01   |
| rs10835210 | BDNF        | 11  | 27,652,486  | 0.48             | Dom                        | 1.03 (0.6-1.76)            | 1.81 (0.72-4.53)     | 1.6 (0.91-2.82)  | 8.30E-01                         | 9.74E-01         | 9.99E-01   |
| rs2278319  | CHRNA2      | 8   | 27,364,878  | 0.24             | Dom                        | 0.83 (0.51-1.35)           | 1.82 (0.98-3.39)     | 1.41 (0.66-3.06) | 6.17E-01                         | 6.31E-01         | 9.99E-01   |
| rs4987059  | DRD4        | 11  | 626,433     | 0.05             | Add                        | 1.14 (0.53-2.45)           | 1.7 (1.02-2.83)      | 1.38 (0.32-5.9)  | 7.94E-01                         | 9.20E-01         | 9.99E-01   |
| rs1106359  | CHRNA2      | 8   | 27,365,256  | 0.42             | Dom                        | 1.17 (0.84-1.63)           | 1.85 (0.78-4.35)     | 1.58 (0.88-2.83) | 5.22E-01                         | 5.68E-01         | 9.99E-01   |
| rs11644593 | CREBBP      | 16  | 3,811,287   | 0.10             | Add                        | 0.87 (0.46-1.62)           | 1.5 (0.89-2.55)      | 2.72 (0.83-8.97) | 3.69E-01                         | 6.42E-01         | 9.99E-01   |
| rs4947535  | DDC         | 7   | 50,499,175  | 0.28             | Add                        | 1.14 (0.8-1.64)            | 1.76 (0.92-3.36)     | 1.57 (0.89-2.77) | 7.63E-01                         | 7.54E-01         | 9.99E-01   |
| rs7766004  | EPB41L2     | 6   | 131,295,666 | 0.27             | Dom                        | 0.88 (0.54-1.44)           | 1.33 (0.7-2.52)      | 2.3 (1.07-4.94)  | 2.82E-01                         | 5.24E-01         | 9.99E-01   |
| rs7771240  | HCRTR2      | 6   | 55,201,790  | 0.28             | Add                        | 0.76 (0.51-1.12)           | 1.82 (0.98-3.4)      | 1.52 (0.82-2.82) | 6.47E-01                         | 3.05E-01         | 9.99E-01   |
| rs510769   | OPRM1       | 6   | 154,403,712 | 0.26             | Add                        | 0.89 (0.6-1.32)            | 1.32 (0.72-2.43)     | 2.08 (1.1-3.94)  | 2.61E-01                         | 4.72E-01         | 9.99E-01   |
| rs4245148  | DRD2        | 11  | 112,825,629 | 0.10             | Dom                        | 0.85 (0.45-1.62)           | 1.88 (1.1-3.24)      | 0.87 (0.27-2.75) | 2.33E-01                         | 4.50E-01         | 9.99E-01   |
| rs151331   | GNAS        | 20  | 56,925,899  | 0.30             | Dom                        | 1.14 (0.7-1.86)            | 1.21 (0.6-2.45)      | 2.16 (1.09-4.29) | 2.50E-01                         | 4.11E-01         | 9.99E-01   |
| rs883473   | CHRNA7      | 15  | 30,112,968  | 0.31             | Add                        | 0.87 (0.61-1.24)           | 2.17 (1.13-4.14)     | 1.38 (0.78-2.42) | 2.15E-01                         | 3.30E-01         | 9.99E-01   |
| rs11214611 | DRD2        | 11  | 112,835,429 | 0.15             | Add                        | 0.94 (0.57-1.55)           | 1.38 (0.79-2.41)     | 2.64 (1.09-6.43) | 2.12E-01                         | 4.47E-01         | 9.99E-01   |
| rs8027814  | CHRNA7      | 15  | 30,137,964  | 0.29             | Add                        | 0.88 (0.61-1.25)           | 2.14 (1.13-4.04)     | 1.36 (0.77-2.43) | 2.25E-01                         | 3.48E-01         | 9.99E-01   |
| rs4938016  | ANKK1       | 11  | 112,775,225 | 0.32             | Dom                        | 1.05 (0.65-1.7)            | 2.02 (0.97-4.19)     | 1.43 (0.75-2.72) | 4.88E-01                         | 7.81E-01         | 9.99E-01   |
| rs6975     | EPB41L2     | 6   | 131,197,795 | 0.26             | Add                        | 1.04 (0.7-1.55)            | 1.99 (1.05-3.79)     | 1.42 (0.77-2.62) | 4.02E-01                         | 6.83E-01         | 9.99E-01   |
| rs7456339  | DDC         | 7   | 50,583,334  | 0.14             | Dom                        | 1.11 (0.64-1.94)           | 1.55 (0.89-2.7)      | 2.13 (0.8-5.63)  | 5.78E-01                         | 7.92E-01         | 9.99E-01   |
| rs748283   | CHRNA2      | 8   | 27,373,112  | 0.49             | Add                        | 0.86 (0.62-1.2)            | 1.32 (0.61-2.85)     | 1.69 (1.04-2.74) | 4.71E-01                         | 5.48E-01         | 9.99E-01   |
| rs1913456  | CHRNA7      | 15  | 30,133,241  | 0.20             | Add                        | 0.99 (0.66-1.5)            | 2.09 (1.16-3.76)     | 1.15 (0.57-2.3)  | 1.59E-01                         | 3.66E-01         | 9.99E-01   |
| rs6598007  | DRD4        | 11  | 646,523     | 0.06             | Add                        | 1.16 (0.58-2.3)            | 1.73 (1.03-2.9)      | 1.28 (0.35-4.62) | 6.71E-01                         | 8.61E-01         | 9.99E-01   |
| rs2839942  | EPB41L2     | 6   | 131,250,191 | 0.31             | Dom                        | 0.83 (0.52-1.35)           | 1.6 (0.82-3.14)      | 1.78 (0.88-3.6)  | 8.32E-01                         | 7.54E-01         | 9.99E-01   |
| rs2175886  | CHRNA7      | 15  | 30,143,239  | 0.47             | Dom                        | 0.68 (0.41-1.12)           | 1.68 (0.75-3.81)     | 1.66 (0.91-3.03) | 9.79E-01                         | 3.18E-01         | 9.99E-01   |
| rs891394   | CHRNA2      | 8   | 27,375,686  | 0.26             | Add                        | 0.94 (0.64-1.4)            | 1.48 (0.8-2.73)      | 1.86 (0.99-3.5)  | 5.65E-01                         | 8.29E-01         | 9.99E-01   |
| rs12055940 | PRKAR2B     | 7   | 106,538,782 | 0.09             | Dom                        | 0.98 (0.52-1.85)           | 1.82 (1.07-3.1)      | 1.07 (0.34-3.38) | 4.10E-01                         | 7.10E-01         | 9.99E-01   |
| rs203298   | EPB41       | 1   | 29,105,251  | 0.09             | Add                        | 0.84 (0.45-1.58)           | 1.66 (0.99-2.78)     | 1.51 (0.46-4.91) | 8.85E-01                         | 8.41E-01         | 9.99E-01   |
| rs6977868  | PRKAR2B     | 7   | 106,577,791 | 0.18             | Dom                        | 1.08 (0.65-1.8)            | 1.48 (0.83-2.65)     | 2.11 (0.9-4.98)  | 5.02E-01                         | 7.35E-01         | 1.00E-00   |
| rs11767623 | PRKAR2B     | 7   | 106,579,568 | 0.18             | Dom                        | 1.03 (0.62-1.72)           | 1.5 (0.83-2.68)      | 2.06 (0.88-4.84) | 5.46E-01                         | 8.14E-01         | 1.00E-00   |
| rs9479757  | OPRM1       | 6   | 154,453,037 | 0.10             | Add                        | 0.88 (0.5-1.55)            | 1.89 (1.11-3.23)     | 0.98 (0.35-2.72) | 2.52E-01                         | 4.81E-01         | 1.00E-00   |
| rs7023210  | FREQ (NCS1) | 9   | 132,011,977 | 0.48             | Dom                        | 1.03 (0.59-1.78)           | 3.16 (1.21-8.3)      | 1.3 (0.74-2.28)  | 1.18E-01                         | 2.74E-01         | 1.00E-00   |
| rs7131056  | DRD2        | 11  | 112,834,984 | 0.45             | Add                        | 1.13 (0.8-1.59)            | 2.21 (0.98-4.97)     | 1.64 (1.01-2.66) | 3.93E-01                         | 5.92E-01         | 1.00E-00   |
| rs806371   | CNR1        | 6   | 88,913,082  | 0.12             | Dom                        | 1.09 (0.62-1.94)           | 1.55 (0.9-2.68)      | 2.08 (0.74-5.84) | 6.25E-01                         | 8.22E-01         | 1.00E-00   |
| rs12705406 | PRKAR2B     | 7   | 106,579,790 | 0.13             | Dom                        | 0.96 (0.54-1.71)           | 1.45 (0.84-2.51)     | 2.6 (0.91-7.37)  | 3.35E-01                         | 6.17E-01         | 1.00E-00   |
| rs806376   | CNR1        | 6   | 88,915,367  | 0.49             | Dom                        | 1.12 (0.64-1.93)           | 2.32 (0.9-6)         | 1.48 (0.84-2.58) | 4.20E-01                         | 6.90E-01         | 1.00E-00   |
| rs510587   | OPRM1       | 6   | 154,455,121 | 0.05             | Add                        | 1.03 (0.48-2.18)           | 1.82 (1.1-3.03)      | 0.75 (0.18-3.12) | 2.44E-01                         | 5.03E-01         | 1.00E-00   |
| rs11238131 | DDC         | 7   | 50,506,083  | 0.28             | Add                        | 1.13 (0.79-1.63)           | 1.74 (0.91-3.33)     | 1.58 (0.9-2.79)  | 7.94E-01                         | 7.81E-01         | 1.00E-00   |
| rs10988653 | FREQ (NCS1) | 9   | 132,046,295 | 0.38             | Add                        | 1.1 (0.78-1.56)            | 2.48 (1.19-5.2)      | 1.44 (0.87-2.39) | 1.33E-01                         | 2.99E-01         | 1.00E-00   |
| rs7125415  | DRD2        | 11  | 112,815,891 | 0.09             | Dom                        | 1.39 (0.76-2.55)           | 1.78 (1.04-3.05)     | 1.28 (0.43-3.81) | 5.98E-01                         | 5.19E-01         | 1.00E-00   |

**Supplemental Table 2: SNP-Specific Results for Abstinence Rates at 6-Month Follow-up**

| SNP        | Gene        | Chr | Position    | MAF <sup>a</sup> | Genetic Model <sup>b</sup> | SNP Odds Ratio<br>(95% CI) | Treatment Odds Ratio |                  | Test of Interaction <sup>c</sup> | LRT <sup>d</sup> |            |
|------------|-------------|-----|-------------|------------------|----------------------------|----------------------------|----------------------|------------------|----------------------------------|------------------|------------|
|            |             |     |             |                  |                            |                            | WT (95% CI)          | Variant (95% CI) |                                  | Observed P       | Adjusted P |
| rs885964   | GNAZ        | 22  | 21,791,003  | 0.45             | Dom                        | 0.94 (0.56-1.57)           | 1.42 (0.61-3.31)     | 1.76 (0.98-3.17) | 6.86E-01                         | 9.06E-01         | 1.00E-00   |
| rs2057291  | GNAS        | 20  | 56,905,438  | 0.37             | Add                        | 1.07 (0.75-1.53)           | 1.2 (0.59-2.44)      | 1.84 (1.09-3.13) | 2.45E-01                         | 4.26E-01         | 1.00E-00   |
| rs1799978  | DRD2        | 11  | 112,851,561 | 0.06             | Dom                        | 1.5 (0.75-3.02)            | 1.71 (1.01-2.88)     | 1.56 (0.43-5.73) | 8.98E-01                         | 5.28E-01         | 1.00E-00   |
| rs4812042  | GNAS        | 20  | 56,895,310  | 0.41             | Add                        | 1.13 (0.8-1.58)            | 1.32 (0.62-2.77)     | 1.72 (1.04-2.82) | 4.48E-01                         | 5.35E-01         | 1.00E-00   |
| rs7775013  | EPB41L2     | 6   | 131,228,271 | 0.37             | Add                        | 1.18 (0.84-1.65)           | 1.48 (0.72-3.03)     | 1.73 (1.05-2.87) | 6.51E-01                         | 5.43E-01         | 1.00E-00   |
| rs2191917  | PRKAR2B     | 7   | 106,560,944 | 0.09             | Dom                        | 0.98 (0.52-1.84)           | 1.8 (1.06-3.06)      | 1.13 (0.36-3.59) | 4.77E-01                         | 7.73E-01         | 1.00E-00   |
| rs2322581  | CHRNA2      | 8   | 27,379,524  | 0.17             | Add                        | 0.91 (0.57-1.45)           | 1.53 (0.87-2.69)     | 1.97 (0.88-4.4)  | 5.94E-01                         | 8.10E-01         | 1.00E-00   |
| rs806377   | CNR1        | 6   | 88,915,442  | 0.46             | Add                        | 1.11 (0.8-1.55)            | 1.67 (0.76-3.68)     | 1.67 (1.03-2.7)  | 9.96E-01                         | 8.10E-01         | 1.00E-00   |
| rs10819611 | FREQ (NCS1) | 9   | 131,995,274 | 0.30             | Dom                        | 1.06 (0.65-1.7)            | 2.28 (1.14-4.56)     | 1.21 (0.62-2.38) | 2.03E-01                         | 4.42E-01         | 1.00E-00   |
| rs928592   | EPB41L2     | 6   | 131,219,792 | 0.29             | Dom                        | 0.98 (0.61-1.59)           | 2.04 (1.03-4.03)     | 1.34 (0.68-2.66) | 3.94E-01                         | 6.83E-01         | 1.00E-00   |
| rs9375785  | EPB41L2     | 6   | 131,316,601 | 0.17             | Add                        | 1 (0.63-1.57)              | 1.56 (0.88-2.75)     | 1.92 (0.88-4.19) | 6.52E-01                         | 9.02E-01         | 1.00E-00   |
| rs2073835  | DBH         | 9   | 135,522,004 | 0.30             | Add                        | 1.05 (0.64-1.72)           | 1.61 (0.8-3.21)      | 1.81 (1.02-3.21) | 5.96E-01                         | 8.35E-01         | 1.00E-00   |
| rs6296     | HTR1B       | 6   | 78,228,979  | 0.28             | Add                        | 0.87 (0.58-1.28)           | 1.31 (0.7-2.45)      | 2.08 (1.11-3.89) | 2.59E-01                         | 4.63E-01         | 1.00E-00   |
| rs17209711 | OPRM1       | 6   | 154,438,148 | 0.16             | Add                        | 0.96 (0.6-1.54)            | 1.64 (0.93-2.9)      | 1.69 (0.75-3.79) | 9.55E-01                         | 9.84E-01         | 1.00E-00   |
| rs12422191 | ANKK1       | 11  | 112,779,220 | 0.09             | Dom                        | 1.18 (0.64-2.17)           | 1.75 (1.02-3)        | 1.33 (0.44-3.98) | 6.59E-01                         | 7.95E-01         | 1.00E-00   |
| rs203278   | EPB41       | 1   | 29,114,784  | 0.36             | Add                        | 1.1 (0.77-1.57)            | 2.04 (1-4.16)        | 1.51 (0.9-2.55)  | 4.22E-01                         | 6.65E-01         | 1.00E-00   |
| rs2985322  | EPB41       | 1   | 29,169,054  | 0.32             | Add                        | 1.03 (0.72-1.47)           | 1.8 (0.92-3.5)       | 1.58 (0.91-2.74) | 7.33E-01                         | 9.39E-01         | 1.00E-00   |
| rs6589377  | DRD2        | 11  | 112,860,946 | 0.35             | Add                        | 0.81 (0.56-1.17)           | 1.62 (0.82-3.18)     | 1.76 (1-3.08)    | 8.33E-01                         | 5.16E-01         | 1.00E-00   |
| rs2133965  | CHRNA7      | 15  | 30,171,846  | 0.07             | Dom                        | 1.13 (0.56-2.29)           | 1.61 (0.96-2.7)      | 2.11 (0.56-7.85) | 7.10E-01                         | 8.78E-01         | 1.00E-00   |
| rs7778076  | PRKAR2B     | 7   | 106,510,244 | 0.09             | Dom                        | 0.85 (0.46-1.57)           | 1.76 (1.04-2.97)     | 1.24 (0.38-4.1)  | 6.18E-01                         | 7.49E-01         | 1.00E-00   |
| rs2452788  | EPB41       | 1   | 29,319,398  | 0.15             | Dom                        | 0.82 (0.44-1.51)           | 1.5 (0.85-2.65)      | 2.24 (0.73-6.84) | 5.33E-01                         | 7.20E-01         | 1.00E-00   |
| rs13212041 | HTR1B       | 6   | 78,227,843  | 0.19             | Add                        | 1.03 (0.66-1.61)           | 1.9 (1.05-3.43)      | 1.34 (0.65-2.77) | 4.45E-01                         | 7.48E-01         | 1.00E-00   |
| rs11030104 | BDNF        | 11  | 27,641,093  | 0.19             | Add                        | 1.02 (0.66-1.57)           | 1.39 (0.77-2.5)      | 2.19 (1.07-4.51) | 3.07E-01                         | 5.88E-01         | 1.00E-00   |
| rs7121     | GNAS        | 20  | 56,912,202  | 0.50             | Dom                        | 1.31 (0.72-2.38)           | 1.53 (0.53-4.39)     | 1.65 (0.96-2.85) | 8.97E-01                         | 6.57E-01         | 1.00E-00   |
| rs234627   | GNAS        | 20  | 56,920,375  | 0.28             | Dom                        | 1.07 (0.66-1.73)           | 1.24 (0.63-2.44)     | 2.22 (1.1-4.48)  | 2.45E-01                         | 4.63E-01         | 1.00E-00   |
| rs2250121  | PRKAR2B     | 7   | 106,540,484 | 0.09             | Dom                        | 0.96 (0.51-1.81)           | 1.81 (1.06-3.08)     | 1.11 (0.35-3.5)  | 4.48E-01                         | 7.42E-01         | 1.00E-00   |
| rs17153861 | PRKAR2B     | 7   | 106,556,875 | 0.09             | Dom                        | 1 (0.53-1.88)              | 1.81 (1.06-3.08)     | 1.09 (0.34-3.47) | 4.37E-01                         | 7.40E-01         | 1.00E-00   |
| rs3777466  | EPB41L2     | 6   | 131,309,919 | 0.46             | Add                        | 0.91 (0.66-1.26)           | 2.02 (0.94-4.32)     | 1.64 (1.01-2.67) | 5.39E-01                         | 6.72E-01         | 1.00E-00   |
| rs9359271  | HTR1B       | 6   | 78,222,839  | 0.27             | Add                        | 0.89 (0.6-1.32)            | 1.31 (0.7-2.45)      | 2.07 (1.11-3.89) | 2.62E-01                         | 4.91E-01         | 1.00E-00   |
| rs607759   | OPRM1       | 6   | 154,414,130 | 0.22             | Dom                        | 1.16 (0.71-1.88)           | 1.6 (0.85-3.01)      | 1.71 (0.81-3.61) | 8.95E-01                         | 8.25E-01         | 1.00E-00   |
| rs623956   | OPRM1       | 6   | 154,471,718 | 0.25             | Add                        | 0.85 (0.56-1.28)           | 1.86 (1-3.46)        | 1.62 (0.82-3.18) | 7.46E-01                         | 6.41E-01         | 1.00E-00   |
| rs1514246  | CHRNA7      | 15  | 30,106,782  | 0.25             | Add                        | 1.03 (0.72-1.49)           | 2.21 (1.18-4.14)     | 1.36 (0.75-2.46) | 1.92E-01                         | 4.19E-01         | 1.00E-00   |
| rs12203487 | HTR1B       | 6   | 78,215,602  | 0.13             | Dom                        | 1.13 (0.65-1.96)           | 1.57 (0.9-2.74)      | 1.96 (0.74-5.19) | 7.04E-01                         | 8.29E-01         | 1.00E-00   |
| rs6960842  | PRKAR2B     | 7   | 106,502,556 | 0.42             | Dom                        | 1.19 (0.71-1.98)           | 1.64 (0.7-3.88)      | 1.65 (0.92-2.96) | 9.91E-01                         | 8.05E-01         | 1.00E-00   |
| rs6128461  | GNAS        | 20  | 56,910,485  | 0.39             | Add                        | 0.99 (0.7-1.4)             | 1.21 (0.59-2.47)     | 1.83 (1.09-3.08) | 2.48E-01                         | 5.03E-01         | 1.00E-00   |
| rs12419948 | BDNF        | 11  | 27,623,560  | 0.18             | Add                        | 0.99 (0.63-1.54)           | 1.41 (0.79-2.51)     | 2.21 (1.05-4.66) | 3.18E-01                         | 6.01E-01         | 1.00E-00   |
| rs988748   | BDNF        | 11  | 27,681,321  | 0.20             | Add                        | 0.99 (0.64-1.52)           | 1.39 (0.78-2.5)      | 2.17 (1.06-4.44) | 3.19E-01                         | 6.03E-01         | 1.00E-00   |
| rs2145288  | GNAS        | 20  | 56,877,604  | 0.28             | Dom                        | 0.87 (0.54-1.41)           | 1.91 (0.98-3.72)     | 1.41 (0.7-2.84)  | 5.40E-01                         | 6.75E-01         | 1.00E-00   |
| rs1491850  | BDNF        | 11  | 27,706,301  | 0.37             | Add                        | 1.05 (0.64-1.74)           | 1.33 (0.64-2.76)     | 1.81 (1.08-3.02) | 2.91E-01                         | 5.46E-01         | 1.00E-00   |

**Supplemental Table 2: SNP-Specific Results for Abstinence Rates at 6-Month Follow-up**

| SNP        | Gene        | Chr | Position    | MAF <sup>a</sup> | Genetic Model <sup>b</sup> | SNP Odds Ratio<br>(95% CI) | Treatment Odds Ratio |                  | Test of Interaction <sup>c</sup> | LRT <sup>d</sup> |            |
|------------|-------------|-----|-------------|------------------|----------------------------|----------------------------|----------------------|------------------|----------------------------------|------------------|------------|
|            |             |     |             |                  |                            |                            | WT (95% CI)          | Variant (95% CI) |                                  | Observed P       | Adjusted P |
| rs10806098 | HTR1B       | 6   | 78,232,728  | 0.28             | Add                        | 0.85 (0.57-1.25)           | 1.34 (0.72-2.51)     | 2.04 (1.09-3.83) | 3.06E-01                         | 4.81E-01         | 1.00E-00   |
| rs2000292  | HTR1B       | 6   | 78,223,664  | 0.28             | Add                        | 0.84 (0.56-1.25)           | 1.36 (0.72-2.55)     | 2.02 (1.07-3.79) | 3.39E-01                         | 4.87E-01         | 1.00E-00   |
| rs2900286  | FREQ (NCS1) | 9   | 132,030,234 | 0.31             | Dom                        | 1.01 (0.62-1.64)           | 2.38 (1.15-4.92)     | 1.21 (0.63-2.34) | 1.76E-01                         | 3.91E-01         | 1.00E-00   |
| rs4779563  | CHRNA7      | 15  | 30,124,529  | 0.25             | Add                        | 0.9 (0.61-1.33)            | 2.09 (1.13-3.86)     | 1.29 (0.69-2.44) | 2.34E-01                         | 4.06E-01         | 1.00E-00   |
| rs1413755  | EPB41L2     | 6   | 131,195,892 | 0.37             | Add                        | 1.1 (0.78-1.55)            | 1.49 (0.73-3.02)     | 1.74 (1.05-2.9)  | 6.50E-01                         | 7.63E-01         | 1.00E-00   |
| rs512053   | OPRM1       | 6   | 154,481,209 | 0.09             | Add                        | 1.15 (0.63-2.12)           | 1.52 (0.9-2.56)      | 2.55 (0.81-7.98) | 4.12E-01                         | 5.71E-01         | 1.00E-00   |
| rs12625436 | GNAS        | 20  | 56,878,608  | 0.39             | Add                        | 1.12 (0.78-1.61)           | 1.29 (0.62-2.71)     | 1.77 (1.07-2.95) | 3.90E-01                         | 5.00E-01         | 1.00E-00   |
| rs2049048  | BDNF        | 11  | 27,707,162  | 0.14             | Dom                        | 0.99 (0.57-1.72)           | 1.56 (0.89-2.71)     | 2.01 (0.77-5.28) | 6.52E-01                         | 9.02E-01         | 1.00E-00   |
| rs1054879  | FREQ (NCS1) | 9   | 132,035,589 | 0.46             | Add                        | 0.84 (0.59-1.18)           | 1.15 (0.53-2.49)     | 1.7 (1.04-2.77)  | 2.66E-01                         | 3.57E-01         | 1.00E-00   |
| rs4779565  | CHRNA7      | 15  | 30,177,362  | 0.42             | Add                        | 0.82 (0.58-1.15)           | 1.91 (0.92-3.95)     | 1.57 (0.95-2.61) | 5.85E-01                         | 3.93E-01         | 1.00E-00   |
| rs868437   | CHRNA7      | 15  | 30,111,569  | 0.29             | Add                        | 0.88 (0.61-1.26)           | 2.1 (1.11-3.97)      | 1.39 (0.78-2.47) | 2.64E-01                         | 4.06E-01         | 1.00E-00   |
| rs3729876  | PRKAR2B     | 7   | 106,574,188 | 0.18             | Dom                        | 1.02 (0.61-1.69)           | 1.48 (0.83-2.66)     | 2.1 (0.9-4.94)   | 5.05E-01                         | 7.89E-01         | 1.00E-00   |
| rs1800900  | GNAS        | 20  | 56,848,505  | 0.39             | Dom                        | 1.06 (0.63-1.8)            | 2.18 (0.92-5.16)     | 1.51 (0.81-2.82) | 4.95E-01                         | 7.87E-01         | 1.00E-00   |
| rs3780708  | FREQ (NCS1) | 9   | 131,975,772 | 0.36             | Dom                        | 1.34 (0.81-2.24)           | 2.41 (1.06-5.45)     | 1.36 (0.72-2.56) | 2.79E-01                         | 3.33E-01         | 1.00E-00   |
| rs557748   | OPRM1       | 6   | 154,405,995 | 0.22             | Dom                        | 1.16 (0.71-1.88)           | 1.67 (0.89-3.13)     | 1.68 (0.8-3.55)  | 9.87E-01                         | 8.41E-01         | 1.00E-00   |
| rs477292   | OPRM1       | 6   | 154,405,080 | 0.22             | Dom                        | 1.16 (0.71-1.88)           | 1.67 (0.89-3.13)     | 1.68 (0.8-3.55)  | 9.87E-01                         | 8.41E-01         | 1.00E-00   |
| rs150093   | EPB41       | 1   | 29,101,418  | 0.13             | Add                        | 1.16 (0.72-1.88)           | 1.62 (0.93-2.84)     | 1.76 (0.75-4.08) | 8.76E-01                         | 8.11E-01         | 1.00E-00   |
| rs1519480  | BDNF        | 11  | 27,632,288  | 0.29             | Add                        | 1.07 (0.74-1.55)           | 1.84 (0.95-3.54)     | 1.54 (0.88-2.72) | 6.45E-01                         | 8.62E-01         | 1.00E-00   |
| rs2277200  | FREQ (NCS1) | 9   | 132,028,530 | 0.31             | Dom                        | 1 (0.62-1.62)              | 2.35 (1.14-4.85)     | 1.23 (0.64-2.37) | 1.94E-01                         | 4.18E-01         | 1.00E-00   |
| rs6466156  | PRKAR2B     | 7   | 106,519,170 | 0.35             | Add                        | 1.03 (0.72-1.47)           | 2.12 (1.05-4.28)     | 1.49 (0.88-2.52) | 3.38E-01                         | 6.32E-01         | 1.00E-00   |
| rs2611605  | CHRNA7      | 15  | 30,228,925  | 0.20             | Add                        | 1 (0.64-1.54)              | 1.39 (0.78-2.51)     | 2.4 (1.15-5.01)  | 2.28E-01                         | 4.71E-01         | 1.00E-00   |
| rs12527143 | HTR1B       | 6   | 78,221,317  | 0.20             | Add                        | 0.85 (0.55-1.31)           | 1.72 (0.96-3.08)     | 1.58 (0.75-3.31) | 8.47E-01                         | 7.21E-01         | 1.00E-00   |
| rs4779969  | CHRNA7      | 15  | 30,136,223  | 0.05             | Dom                        | 0.63 (0.25-1.57)           | 1.64 (0.99-2.72)     | 1.5 (0.26-8.56)  | 9.22E-01                         | 5.85E-01         | 1.00E-00   |
| rs504932   | OPRM1       | 6   | 154,472,161 | 0.25             | Add                        | 0.85 (0.57-1.27)           | 1.71 (0.94-3.11)     | 1.63 (0.84-3.15) | 9.07E-01                         | 6.91E-01         | 1.00E-00   |
| rs11214589 | ANKK1       | 11  | 112,750,258 | 0.46             | Add                        | 1.05 (0.72-1.52)           | 1.16 (0.49-2.74)     | 1.69 (1.02-2.81) | 3.24E-01                         | 5.64E-01         | 1.00E-00   |
| rs4630328  | DRD2        | 11  | 112,839,419 | 0.35             | Add                        | 0.81 (0.56-1.18)           | 1.59 (0.81-3.13)     | 1.75 (1-3.08)    | 8.03E-01                         | 5.46E-01         | 1.00E-00   |
| rs2762686  | EPB41       | 1   | 29,188,832  | 0.12             | Dom                        | 0.97 (0.53-1.78)           | 1.49 (0.87-2.55)     | 2.51 (0.82-7.75) | 4.10E-01                         | 6.99E-01         | 1.00E-00   |
| rs6026574  | GNAS        | 20  | 56,889,890  | 0.37             | Dom                        | 1.24 (0.76-2.02)           | 1.44 (0.66-3.15)     | 1.78 (0.96-3.28) | 6.82E-01                         | 6.17E-01         | 1.00E-00   |
| rs2180696  | GNAS        | 20  | 56,887,299  | 0.40             | Add                        | 0.86 (0.61-1.23)           | 1.69 (0.82-3.5)      | 1.62 (0.98-2.7)  | 9.05E-01                         | 6.97E-01         | 1.00E-00   |
| rs257387   | PRKAR2B     | 7   | 106,595,716 | 0.18             | Dom                        | 1.06 (0.64-1.77)           | 1.49 (0.83-2.68)     | 2.07 (0.88-4.86) | 5.41E-01                         | 7.84E-01         | 1.00E-00   |
| rs2519147  | DBH         | 9   | 135,485,139 | 0.35             | Add                        | 0.87 (0.61-1.25)           | 2.17 (1.08-4.35)     | 1.46 (0.86-2.5)  | 2.93E-01                         | 4.00E-01         | 1.00E-00   |
| rs642489   | OPRM1       | 6   | 154,484,368 | 0.24             | Add                        | 0.85 (0.57-1.27)           | 1.72 (0.95-3.13)     | 1.63 (0.84-3.16) | 8.97E-01                         | 6.96E-01         | 1.00E-00   |
| rs609148   | OPRM1       | 6   | 154,472,707 | 0.24             | Add                        | 0.85 (0.57-1.27)           | 1.72 (0.95-3.13)     | 1.63 (0.84-3.16) | 8.97E-01                         | 6.96E-01         | 1.00E-00   |
| rs7124442  | BDNF        | 11  | 27,633,617  | 0.27             | Dom                        | 0.87 (0.53-1.43)           | 1.47 (0.76-2.84)     | 2.35 (1.11-4.98) | 3.55E-01                         | 6.02E-01         | 1.00E-00   |
| rs2519148  | DBH         | 9   | 135,484,387 | 0.50             | Add                        | 1.01 (0.72-1.42)           | 1.41 (0.61-3.24)     | 1.64 (1.01-2.65) | 6.72E-01                         | 9.10E-01         | 1.00E-00   |
| rs9322446  | OPRM1       | 6   | 154,450,395 | 0.15             | Add                        | 1.22 (0.78-1.9)            | 1.63 (0.93-2.88)     | 1.75 (0.81-3.74) | 8.82E-01                         | 6.76E-01         | 1.00E-00   |
| rs8033518  | CHRNA7      | 15  | 30,168,901  | 0.05             | Dom                        | 0.65 (0.26-1.63)           | 1.66 (1-2.74)        | 1.4 (0.25-8.02)  | 8.56E-01                         | 6.32E-01         | 1.00E-00   |
| rs6484320  | BDNF        | 11  | 27,659,764  | 0.19             | Add                        | 1 (0.65-1.54)              | 1.41 (0.78-2.53)     | 2.14 (1.05-4.39) | 3.40E-01                         | 6.30E-01         | 1.00E-00   |
| rs4938010  | ANKK1       | 11  | 112,750,776 | 0.15             | Dom                        | 1.25 (0.74-2.12)           | 1.71 (0.96-3.05)     | 1.64 (0.68-3.95) | 9.42E-01                         | 7.09E-01         | 1.00E-00   |

**Supplemental Table 2: SNP-Specific Results for Abstinence Rates at 6-Month Follow-up**

| SNP        | Gene        | Chr | Position    | MAF <sup>a</sup> | Genetic Model <sup>b</sup> | SNP Odds Ratio<br>(95% CI) | Treatment Odds Ratio |                   | Test of Interaction <sup>c</sup> | LRT <sup>d</sup> |            |
|------------|-------------|-----|-------------|------------------|----------------------------|----------------------------|----------------------|-------------------|----------------------------------|------------------|------------|
|            |             |     |             |                  |                            |                            | WT (95% CI)          | Variant (95% CI)  |                                  | Observed P       | Adjusted P |
| rs234621   | GNAS        | 20  | 56,923,643  | 0.29             | Dom                        | 1.11 (0.69-1.8)            | 1.26 (0.63-2.52)     | 2.12 (1.07-4.22)  | 2.96E-01                         | 4.99E-01         | 1.00E-00   |
| rs157213   | EPB41       | 1   | 29,126,858  | 0.12             | Dom                        | 0.98 (0.53-1.81)           | 1.45 (0.84-2.48)     | 2.52 (0.82-7.78)  | 3.83E-01                         | 6.64E-01         | 1.00E-00   |
| rs1342043  | FREQ (NCS1) | 9   | 131,998,126 | 0.14             | Add                        | 0.83 (0.49-1.39)           | 1.47 (0.85-2.55)     | 2.65 (1.03-6.82)  | 2.75E-01                         | 4.66E-01         | 1.00E-00   |
| rs9802616  | FREQ (NCS1) | 9   | 131,970,944 | 0.16             | Add                        | 0.85 (0.54-1.37)           | 1.94 (1.1-3.42)      | 1.17 (0.52-2.61)  | 2.88E-01                         | 4.41E-01         | 1.00E-00   |
| rs157194   | EPB41       | 1   | 29,108,306  | 0.12             | Dom                        | 0.97 (0.53-1.79)           | 1.5 (0.87-2.56)      | 2.51 (0.81-7.74)  | 4.16E-01                         | 7.04E-01         | 1.00E-00   |
| rs9788657  | CHRNA7      | 15  | 30,182,318  | 0.20             | Add                        | 0.88 (0.57-1.37)           | 1.79 (0.99-3.24)     | 1.41 (0.69-2.89)  | 5.89E-01                         | 7.15E-01         | 1.00E-00   |
| rs8030315  | CHRNA7      | 15  | 30,184,411  | 0.20             | Add                        | 0.88 (0.57-1.37)           | 1.79 (0.99-3.24)     | 1.41 (0.69-2.89)  | 5.89E-01                         | 7.15E-01         | 1.00E-00   |
| rs8035668  | CHRNA7      | 15  | 30,178,638  | 0.20             | Add                        | 0.89 (0.57-1.37)           | 1.81 (1-3.27)        | 1.41 (0.69-2.89)  | 5.73E-01                         | 7.14E-01         | 1.00E-00   |
| rs2281487  | EPB41L2     | 6   | 131,192,810 | 0.40             | Add                        | 1.06 (0.75-1.49)           | 1.37 (0.66-2.84)     | 1.74 (1.06-2.88)  | 4.95E-01                         | 7.46E-01         | 1.00E-00   |
| rs2536504  | PRKAR2B     | 7   | 106,501,141 | 0.34             | Dom                        | 1.17 (0.72-1.9)            | 1.55 (0.74-3.27)     | 1.72 (0.91-3.24)  | 8.38E-01                         | 7.80E-01         | 1.00E-00   |
| rs6064716  | GNAS        | 20  | 56,877,541  | 0.13             | Add                        | 0.99 (0.6-1.62)            | 1.52 (0.88-2.61)     | 2.17 (0.88-5.37)  | 4.87E-01                         | 7.80E-01         | 1.00E-00   |
| rs11030121 | BDNF        | 11  | 27,692,783  | 0.27             | Add                        | 1 (0.69-1.46)              | 1.84 (0.97-3.47)     | 1.53 (0.84-2.76)  | 6.36E-01                         | 8.93E-01         | 1.00E-00   |
| rs484000   | EPB41       | 1   | 29,324,724  | 0.07             | Add                        | 1.14 (0.57-2.28)           | 1.66 (0.96-2.87)     | 1.23 (0.34-4.48)  | 6.75E-01                         | 8.76E-01         | 1.00E-00   |
| rs11071530 | CHRNA7      | 15  | 30,147,264  | 0.10             | Add                        | 0.83 (0.46-1.48)           | 1.61 (0.95-2.72)     | 1.85 (0.63-5.48)  | 8.14E-01                         | 7.92E-01         | 1.00E-00   |
| rs1003641  | ANKK1       | 11  | 112,778,846 | 0.30             | Dom                        | 1.04 (0.64-1.68)           | 2.04 (1-4.13)        | 1.37 (0.7-2.66)   | 4.20E-01                         | 7.21E-01         | 1.00E-00   |
| rs3798683  | OPRM1       | 6   | 154,460,107 | 0.16             | Add                        | 0.96 (0.6-1.54)            | 1.51 (0.86-2.65)     | 2.05 (0.9-4.65)   | 5.28E-01                         | 8.16E-01         | 1.00E-00   |
| rs3778158  | OPRM1       | 6   | 154,447,423 | 0.16             | Add                        | 0.95 (0.6-1.52)            | 1.67 (0.95-2.94)     | 1.64 (0.73-3.64)  | 9.66E-01                         | 9.76E-01         | 1.00E-00   |
| rs4590907  | ANKK1       | 11  | 112,768,580 | 0.14             | Add                        | 1.16 (0.72-1.87)           | 1.78 (1.01-3.14)     | 1.48 (0.65-3.35)  | 7.03E-01                         | 7.71E-01         | 1.00E-00   |
| rs10891545 | ANKK1       | 11  | 112,763,275 | 0.15             | Add                        | 1.1 (0.68-1.77)            | 1.78 (1.01-3.13)     | 1.46 (0.65-3.29)  | 6.83E-01                         | 8.47E-01         | 1.00E-00   |
| rs4543330  | HTR1B       | 6   | 78,247,352  | 0.14             | Add                        | 1.27 (0.8-2.02)            | 1.66 (0.94-2.92)     | 1.67 (0.75-3.75)  | 9.88E-01                         | 5.90E-01         | 1.00E-00   |
| rs9788679  | CHRNA7      | 15  | 30,186,609  | 0.19             | Add                        | 0.92 (0.6-1.42)            | 1.83 (1.01-3.29)     | 1.38 (0.67-2.83)  | 5.23E-01                         | 7.41E-01         | 1.00E-00   |
| rs7768760  | HCRTR2      | 6   | 55,153,334  | 0.49             | Dom                        | 0.96 (0.56-1.67)           | 1.89 (0.75-4.81)     | 1.59 (0.9-2.81)   | 7.53E-01                         | 9.44E-01         | 1.00E-00   |
| rs7175581  | CHRNA7      | 15  | 30,172,759  | 0.43             | Dom                        | 0.95 (0.57-1.59)           | 1.09 (0.47-2.54)     | 2.04 (1.12-3.71)  | 2.35E-01                         | 4.90E-01         | 1.00E-00   |
| rs10819610 | FREQ (NCS1) | 9   | 131,986,436 | 0.28             | Add                        | 1 (0.7-1.43)               | 1.93 (1.02-3.65)     | 1.48 (0.84-2.62)  | 4.75E-01                         | 7.74E-01         | 1.00E-00   |
| rs2337980  | CHRNA7      | 15  | 30,231,488  | 0.44             | Dom                        | 1.22 (0.72-2.08)           | 2.02 (0.81-5.01)     | 1.53 (0.86-2.7)   | 6.11E-01                         | 6.88E-01         | 1.00E-00   |
| rs7402321  | CHRNA7      | 15  | 30,207,700  | 0.38             | Dom                        | 1.25 (0.75-2.1)            | 1.49 (0.64-3.43)     | 1.65 (0.89-3.04)  | 8.48E-01                         | 6.53E-01         | 1.00E-00   |
| rs2734848  | ANKK1       | 11  | 112,775,584 | 0.17             | Dom                        | 0.88 (0.51-1.52)           | 1.88 (1.04-3.42)     | 1.37 (0.55-3.39)  | 5.68E-01                         | 7.36E-01         | 1.00E-00   |
| rs157198   | EPB41       | 1   | 29,076,494  | 0.08             | Add                        | 0.81 (0.43-1.55)           | 1.79 (1.06-3.01)     | 1.31 (0.39-4.37)  | 6.36E-01                         | 7.02E-01         | 1.00E-00   |
| rs77905    | DBH         | 9   | 135,507,918 | 0.48             | Add                        | 0.94 (0.67-1.32)           | 2.45 (1.06-5.63)     | 1.61 (0.99-2.63)  | 2.37E-01                         | 4.29E-01         | 1.00E-00   |
| rs1514248  | CHRNA7      | 15  | 30,164,975  | 0.13             | Add                        | 0.86 (0.54-1.37)           | 1.74 (0.99-3.05)     | 1.21 (0.51-2.89)  | 4.58E-01                         | 5.79E-01         | 1.00E-00   |
| rs1124492  | ANKK1       | 11  | 112,787,485 | 0.11             | Dom                        | 1.21 (0.68-2.16)           | 1.69 (0.97-2.93)     | 1.5 (0.54-4.15)   | 8.45E-01                         | 8.04E-01         | 1.00E-00   |
| rs1039394  | CHRNA7      | 15  | 30,195,021  | 0.05             | Dom                        | 1.32 (0.62-2.81)           | 1.58 (0.95-2.63)     | 2.44 (0.58-10.25) | 5.74E-01                         | 6.39E-01         | 1.00E-00   |
| rs7452651  | HCRTR2      | 6   | 55,243,472  | 0.22             | Add                        | 0.78 (0.51-1.19)           | 1.83 (1.02-3.3)      | 1.4 (0.69-2.84)   | 5.40E-01                         | 3.98E-01         | 1.00E-00   |
| rs4311512  | HCRTR2      | 6   | 55,198,654  | 0.28             | Add                        | 0.78 (0.53-1.14)           | 1.77 (0.95-3.3)      | 1.58 (0.85-2.91)  | 7.73E-01                         | 3.89E-01         | 1.00E-00   |
| rs1381376  | OPRM1       | 6   | 154,434,951 | 0.16             | Add                        | 0.94 (0.59-1.51)           | 1.66 (0.94-2.93)     | 1.65 (0.74-3.7)   | 9.92E-01                         | 9.71E-01         | 1.00E-00   |
| rs130058   | HTR1B       | 6   | 78,230,000  | 0.29             | Add                        | 0.86 (0.58-1.26)           | 1.44 (0.76-2.71)     | 1.81 (0.99-3.31)  | 5.64E-01                         | 6.37E-01         | 1.00E-00   |
| rs2519143  | DBH         | 9   | 135,492,149 | 0.18             | Add                        | 1.01 (0.63-1.63)           | 1.36 (0.76-2.43)     | 2.41 (1.09-5.35)  | 2.41E-01                         | 4.90E-01         | 1.00E-00   |
| rs1213370  | HTR1B       | 6   | 78,235,516  | 0.47             | Dom                        | 0.93 (0.66-1.31)           | 2.18 (0.85-5.63)     | 1.5 (0.86-2.63)   | 3.91E-01                         | 6.60E-01         | 1.00E-00   |
| rs204057   | EPB41       | 1   | 29,144,644  | 0.24             | Dom                        | 1.11 (0.69-1.8)            | 1.59 (0.84-2.99)     | 1.77 (0.84-3.75)  | 8.27E-01                         | 8.75E-01         | 1.00E-00   |

**Supplemental Table 2: SNP-Specific Results for Abstinence Rates at 6-Month Follow-up**

| SNP        | Gene        | Chr | Position    | MAF <sup>a</sup> | Genetic Model <sup>b</sup> | SNP Odds Ratio<br>(95% CI) | Treatment Odds Ratio |                  | Test of Interaction <sup>c</sup> | LRT <sup>d</sup> |            |
|------------|-------------|-----|-------------|------------------|----------------------------|----------------------------|----------------------|------------------|----------------------------------|------------------|------------|
|            |             |     |             |                  |                            |                            | WT (95% CI)          | Variant (95% CI) |                                  | Observed P       | Adjusted P |
| rs4620755  | DRD2        | 11  | 112,814,829 | 0.11             | Add                        | 1.21 (0.74-1.99)           | 1.74 (1.01-2.99)     | 1.5 (0.63-3.6)   | 7.71E-01                         | 7.04E-01         | 1.00E-00   |
| rs10767664 | BDNF        | 11  | 27,682,562  | 0.19             | Add                        | 1.01 (0.65-1.56)           | 1.41 (0.79-2.54)     | 2.1 (1.02-4.32)  | 3.71E-01                         | 6.66E-01         | 1.00E-00   |
| rs9492767  | EPB41L2     | 6   | 131,314,703 | 0.19             | Dom                        | 1.01 (0.61-1.67)           | 1.76 (0.96-3.21)     | 1.52 (0.68-3.41) | 7.81E-01                         | 9.62E-01         | 1.00E-00   |
| rs12378342 | FREQ (NCS1) | 9   | 131,970,164 | 0.08             | Add                        | 1.13 (0.59-2.16)           | 1.68 (0.99-2.83)     | 1.53 (0.46-5.15) | 8.93E-01                         | 9.33E-01         | 1.00E-00   |
| rs11568817 | HTR1B       | 6   | 78,230,101  | 0.44             | Add                        | 1.08 (0.76-1.53)           | 1.22 (0.56-2.69)     | 1.72 (1.05-2.8)  | 3.42E-01                         | 5.58E-01         | 1.00E-00   |
| rs1799971  | OPRM1       | 6   | 154,402,490 | 0.12             | Dom                        | 0.82 (0.46-1.48)           | 1.65 (0.96-2.84)     | 1.7 (0.6-4.83)   | 9.58E-01                         | 8.06E-01         | 1.00E-00   |
| rs7037293  | FREQ (NCS1) | 9   | 132,002,538 | 0.13             | Add                        | 0.82 (0.49-1.38)           | 1.45 (0.85-2.5)      | 2.36 (0.91-6.15) | 3.70E-01                         | 5.44E-01         | 1.00E-00   |
| rs11030119 | BDNF        | 11  | 27,684,678  | 0.26             | Dom                        | 0.93 (0.58-1.5)            | 1.52 (0.8-2.88)      | 1.87 (0.9-3.87)  | 6.75E-01                         | 8.90E-01         | 1.00E-00   |
| rs10819615 | FREQ (NCS1) | 9   | 132,014,745 | 0.36             | Dom                        | 1.2 (0.74-1.97)            | 1.98 (0.92-4.25)     | 1.4 (0.75-2.61)  | 4.92E-01                         | 6.23E-01         | 1.00E-00   |
| rs3897499  | FREQ (NCS1) | 9   | 132,014,885 | 0.36             | Dom                        | 1.13 (0.69-1.83)           | 1.99 (0.93-4.22)     | 1.41 (0.75-2.64) | 4.90E-01                         | 7.27E-01         | 1.00E-00   |
| rs7862394  | FREQ (NCS1) | 9   | 131,989,685 | 0.32             | Dom                        | 0.96 (0.59-1.54)           | 2.16 (1.07-4.34)     | 1.29 (0.66-2.53) | 3.02E-01                         | 5.56E-01         | 1.00E-00   |
| rs1213366  | HTR1B       | 6   | 78,233,589  | 0.43             | Add                        | 1.06 (0.75-1.5)            | 1.39 (0.64-3.04)     | 1.7 (1.04-2.77)  | 5.77E-01                         | 7.96E-01         | 1.00E-00   |
| rs589046   | OPRM1       | 6   | 154,434,831 | 0.26             | Add                        | 0.95 (0.65-1.41)           | 1.45 (0.78-2.7)      | 1.88 (1.01-3.49) | 5.11E-01                         | 7.90E-01         | 1.00E-00   |
| rs908867   | BDNF        | 11  | 27,702,340  | 0.10             | Add                        | 1.1 (0.65-1.88)            | 1.8 (1.05-3.06)      | 1.2 (0.46-3.18)  | 4.63E-01                         | 7.02E-01         | 1.00E-00   |
| rs234630   | GNAS        | 20  | 56,917,050  | 0.30             | Dom                        | 1.15 (0.71-1.86)           | 1.39 (0.69-2.8)      | 1.93 (0.98-3.78) | 5.11E-01                         | 6.54E-01         | 1.00E-00   |
| rs2519154  | DBH         | 9   | 135,502,096 | 0.42             | Dom                        | 1.13 (0.67-1.89)           | 1.69 (0.72-3.97)     | 1.63 (0.91-2.92) | 9.42E-01                         | 8.98E-01         | 1.00E-00   |
| rs648893   | OPRM1       | 6   | 154,480,321 | 0.24             | Add                        | 0.87 (0.58-1.29)           | 1.67 (0.92-3.05)     | 1.6 (0.83-3.09)  | 9.16E-01                         | 7.47E-01         | 1.00E-00   |
| rs7873936  | FREQ (NCS1) | 9   | 132,032,983 | 0.18             | Dom                        | 1.12 (0.68-1.86)           | 1.8 (0.99-3.27)      | 1.4 (0.62-3.16)  | 6.22E-01                         | 8.23E-01         | 1.00E-00   |
| rs4240446  | FREQ (NCS1) | 9   | 132,018,220 | 0.14             | Add                        | 0.83 (0.49-1.41)           | 1.37 (0.78-2.42)     | 2.33 (0.89-6.1)  | 3.35E-01                         | 5.21E-01         | 1.00E-00   |
| rs2798949  | HTR1B       | 6   | 78,246,853  | 0.34             | Dom                        | 1.16 (0.71-1.89)           | 1.98 (0.92-4.26)     | 1.5 (0.8-2.79)   | 5.80E-01                         | 7.45E-01         | 1.00E-00   |
| rs495491   | OPRM1       | 6   | 154,424,235 | 0.26             | Add                        | 0.92 (0.62-1.35)           | 1.39 (0.75-2.56)     | 1.97 (1.05-3.68) | 3.79E-01                         | 6.33E-01         | 1.00E-00   |
| rs10456181 | HCRTR2      | 6   | 55,148,655  | 0.35             | Dom                        | 0.98 (0.6-1.61)            | 2.45 (1.14-5.27)     | 1.26 (0.67-2.35) | 1.84E-01                         | 3.96E-01         | 1.00E-00   |
| rs10988645 | FREQ (NCS1) | 9   | 132,019,357 | 0.29             | Dom                        | 1.16 (0.72-1.87)           | 2.07 (1.02-4.2)      | 1.37 (0.7-2.66)  | 4.02E-01                         | 6.23E-01         | 1.00E-00   |
| rs129886   | DBH         | 9   | 135,518,542 | 0.17             | Dom                        | 1.03 (0.62-1.73)           | 1.56 (0.86-2.82)     | 2.06 (0.88-4.8)  | 6.01E-01                         | 8.59E-01         | 1.00E-00   |
| rs1076150  | DBH         | 9   | 135,488,582 | 0.47             | Add                        | 1.16 (0.83-1.63)           | 1.33 (0.59-3.03)     | 1.73 (1.05-2.86) | 4.53E-01                         | 4.61E-01         | 1.00E-00   |
| rs917690   | FREQ (NCS1) | 9   | 131,974,002 | 0.11             | Add                        | 0.98 (0.56-1.73)           | 1.56 (0.89-2.73)     | 2.1 (0.76-5.83)  | 6.02E-01                         | 8.67E-01         | 1.00E-00   |
| rs9322447  | OPRM1       | 6   | 154,466,013 | 0.48             | Add                        | 0.84 (0.6-1.19)            | 1.61 (0.73-3.55)     | 1.69 (1.04-2.75) | 8.92E-01                         | 6.17E-01         | 1.00E-00   |
| rs3824544  | FREQ (NCS1) | 9   | 131,988,371 | 0.25             | Dom                        | 1.15 (0.8-1.65)            | 1.77 (0.94-3.35)     | 1.57 (0.75-3.29) | 9.97E-01                         | 7.49E-01         | 1.00E-00   |
| rs7103873  | BDNF        | 11  | 27,656,893  | 0.48             | Dom                        | 0.94 (0.55-1.61)           | 1.14 (0.45-2.87)     | 1.9 (1.08-3.35)  | 3.54E-01                         | 6.50E-01         | 1.00E-00   |
| rs1401635  | BDNF        | 11  | 27,650,567  | 0.27             | Dom                        | 1.01 (0.62-1.62)           | 1.49 (0.77-2.87)     | 1.88 (0.93-3.81) | 6.31E-01                         | 8.87E-01         | 1.00E-00   |
| rs1213371  | HTR1B       | 6   | 78,236,764  | 0.43             | Add                        | 1.06 (0.75-1.5)            | 1.43 (0.65-3.11)     | 1.73 (1.06-2.82) | 5.91E-01                         | 8.12E-01         | 1.00E-00   |
| rs7849345  | FREQ (NCS1) | 9   | 131,984,366 | 0.49             | Add                        | 1.1 (0.79-1.55)            | 1.31 (0.57-3.02)     | 1.66 (1.02-2.69) | 5.02E-01                         | 6.20E-01         | 1.00E-00   |
| rs2030324  | BDNF        | 11  | 27,683,491  | 0.46             | Dom                        | 0.88 (0.52-1.49)           | 1.2 (0.49-2.91)      | 1.89 (1.07-3.37) | 3.96E-01                         | 6.52E-01         | 1.00E-00   |
| rs7934165  | BDNF        | 11  | 27,688,559  | 0.46             | Dom                        | 0.88 (0.52-1.5)            | 1.2 (0.49-2.91)      | 1.88 (1.05-3.35) | 4.05E-01                         | 6.61E-01         | 1.00E-00   |
| rs514980   | OPRM1       | 6   | 154,409,860 | 0.22             | Add                        | 1.09 (0.73-1.65)           | 1.43 (0.78-2.62)     | 1.94 (1-3.78)    | 4.72E-01                         | 6.85E-01         | 1.00E-00   |
| rs10819621 | FREQ (NCS1) | 9   | 132,045,353 | 0.14             | Dom                        | 0.96 (0.56-1.64)           | 1.93 (1.1-3.39)      | 1.12 (0.44-2.85) | 3.30E-01                         | 6.01E-01         | 1.00E-00   |
| rs1519479  | BDNF        | 11  | 27,624,107  | 0.47             | Add                        | 1 (0.7-1.41)               | 1.38 (0.61-3.13)     | 1.67 (1.03-2.71) | 5.91E-01                         | 8.64E-01         | 1.00E-00   |
| rs1557123  | FREQ (NCS1) | 9   | 132,042,979 | 0.08             | Add                        | 1.01 (0.55-1.85)           | 1.84 (1.09-3.13)     | 1.06 (0.35-3.21) | 3.64E-01                         | 6.42E-01         | 1.00E-00   |
| rs3780711  | FREQ (NCS1) | 9   | 131,982,864 | 0.12             | Add                        | 1.05 (0.63-1.75)           | 1.44 (0.82-2.53)     | 2.43 (0.96-6.16) | 3.25E-01                         | 5.75E-01         | 1.00E-00   |

**Supplemental Table 2: SNP-Specific Results for Abstinence Rates at 6-Month Follow-up**

| SNP        | Gene        | Chr | Position    | MAF <sup>a</sup> | Genetic Model <sup>b</sup> | SNP Odds Ratio<br>(95% CI) | Treatment Odds Ratio |                   | Test of Interaction <sup>c</sup> | LRT <sup>d</sup> |            |
|------------|-------------|-----|-------------|------------------|----------------------------|----------------------------|----------------------|-------------------|----------------------------------|------------------|------------|
|            |             |     |             |                  |                            |                            | WT (95% CI)          | Variant (95% CI)  |                                  | Observed P       | Adjusted P |
| rs1145831  | HTR1B       | 6   | 78,217,292  | 0.22             | Add                        | 1.15 (0.77-1.71)           | 1.51 (0.82-2.76)     | 1.85 (0.95-3.57)  | 6.23E-01                         | 6.40E-01         | 1.00E-00   |
| rs1323041  | OPRM1       | 6   | 154,480,873 | 0.48             | Add                        | 0.85 (0.6-1.2)             | 1.58 (0.72-3.46)     | 1.68 (1.03-2.73)  | 8.57E-01                         | 6.45E-01         | 1.00E-00   |
| rs3778155  | OPRM1       | 6   | 154,445,511 | 0.17             | Dom                        | 1.07 (0.63-1.82)           | 1.65 (0.88-3.08)     | 1.71 (0.71-4.12)  | 9.44E-01                         | 9.66E-01         | 1.00E-00   |
| rs947513   | FREQ (NCS1) | 9   | 132,013,809 | 0.45             | Add                        | 0.95 (0.68-1.33)           | 1.5 (0.7-3.23)       | 1.68 (1.03-2.73)  | 7.51E-01                         | 9.21E-01         | 1.00E-00   |
| rs1108580  | DBH         | 9   | 135,494,935 | 0.45             | Add                        | 1.16 (0.82-1.65)           | 1.42 (0.63-3.21)     | 1.67 (1.01-2.78)  | 6.43E-01                         | 5.88E-01         | 1.00E-00   |
| rs1013402  | BDNF        | 11  | 27,668,957  | 0.27             | Add                        | 1.11 (0.76-1.61)           | 1.76 (0.92-3.36)     | 1.57 (0.88-2.81)  | 7.68E-01                         | 8.43E-01         | 1.00E-00   |
| rs11030101 | BDNF        | 11  | 27,637,320  | 0.48             | Dom                        | 0.89 (0.52-1.53)           | 1.21 (0.48-3.05)     | 1.86 (1.06-3.28)  | 4.34E-01                         | 7.00E-01         | 1.00E-00   |
| rs129884   | DBH         | 9   | 135,514,907 | 0.16             | Add                        | 0.94 (0.59-1.52)           | 1.41 (0.8-2.5)       | 2.31 (1.02-5.23)  | 3.17E-01                         | 5.99E-01         | 1.00E-00   |
| rs1611115  | DBH         | 9   | 135,490,336 | 0.19             | Dom                        | 0.99 (0.6-1.64)            | 1.38 (0.76-2.5)      | 2.23 (0.98-5.07)  | 3.53E-01                         | 6.44E-01         | 1.00E-00   |
| rs1611118  | DBH         | 9   | 135,494,744 | 0.05             | Dom                        | 1.05 (0.47-2.32)           | 1.58 (0.95-2.62)     | 2.59 (0.56-11.95) | 5.44E-01                         | 8.06E-01         | 1.00E-00   |
| rs2519155  | DBH         | 9   | 135,494,419 | 0.38             | Dom                        | 1.04 (0.63-1.71)           | 2.33 (1.05-5.18)     | 1.34 (0.73-2.47)  | 2.83E-01                         | 5.58E-01         | 1.00E-00   |
| rs2007153  | DBH         | 9   | 135,493,640 | 0.34             | Add                        | 0.84 (0.58-1.21)           | 1.46 (0.74-2.87)     | 1.76 (1.01-3.06)  | 6.25E-01                         | 5.93E-01         | 1.00E-00   |
| rs1541332  | DBH         | 9   | 135,501,337 | 0.45             | Dom                        | 1.31 (0.76-2.25)           | 1.84 (0.73-4.68)     | 1.57 (0.9-2.76)   | 7.74E-01                         | 5.97E-01         | 1.00E-00   |
| rs1541333  | DBH         | 9   | 135,501,206 | 0.44             | Dom                        | 1.18 (0.84-1.64)           | 1.43 (0.59-3.47)     | 1.77 (1-3.14)     | 6.16E-01                         | 5.31E-01         | 1.00E-00   |
| rs2797849  | DBH         | 9   | 135,491,762 | 0.38             | Dom                        | 1.01 (0.62-1.67)           | 2.36 (1.06-5.25)     | 1.34 (0.73-2.47)  | 2.74E-01                         | 5.42E-01         | 1.00E-00   |
| rs4311511  | HCRTR2      | 6   | 55,198,566  | 0.29             | Add                        | 0.8 (0.54-1.17)            | 1.82 (0.96-3.45)     | 1.59 (0.86-2.93)  | 7.28E-01                         | 4.57E-01         | 1.00E-00   |
| rs5320     | DBH         | 9   | 135,497,294 | 0.07             | Add                        | 0.77 (0.35-1.69)           | 1.67 (0.98-2.83)     | 1.61 (0.36-7.25)  | 9.64E-01                         | 7.73E-01         | 1.00E-00   |
| rs3778151  | OPRM1       | 6   | 154,435,373 | 0.16             | Add                        | 0.96 (0.57-1.6)            | 1.71 (0.97-3.03)     | 1.56 (0.71-3.4)   | 6.80E-01                         | 8.97E-01         | 1.00E-00   |
| rs3823010  | OPRM1       | 6   | 154,420,845 | 0.16             | Add                        | 0.93 (0.58-1.49)           | 1.64 (0.93-2.88)     | 1.7 (0.76-3.8)    | 9.36E-01                         | 9.53E-01         | 1.00E-00   |
| rs7773995  | OPRM1       | 6   | 154,424,060 | 0.16             | Add                        | 0.93 (0.58-1.49)           | 1.64 (0.93-2.88)     | 1.7 (0.76-3.8)    | 9.36E-01                         | 9.53E-01         | 1.00E-00   |
| rs129915   | DBH         | 9   | 135,514,739 | 0.29             | Dom                        | 1.24 (0.75-2.05)           | 1.78 (0.84-3.77)     | 1.59 (0.79-3.19)  | 8.27E-01                         | 7.03E-01         | 1.00E-00   |
| rs2653348  | HCRTR2      | 6   | 55,247,827  | 0.41             | Dom                        | 0.99 (0.6-1.64)            | 1.72 (0.75-3.94)     | 1.63 (0.9-2.94)   | 9.18E-01                         | 9.94E-01         | 1.00E-00   |
| rs129883   | DBH         | 9   | 135,514,632 | 0.36             | Dom                        | 1.13 (0.69-1.86)           | 2.12 (0.95-4.73)     | 1.42 (0.78-2.6)   | 4.37E-01                         | 6.81E-01         | 1.00E-00   |
| rs2811239  | HCRTR2      | 6   | 55,229,913  | 0.17             | Add                        | 1.27 (0.83-1.97)           | 1.62 (0.9-2.93)      | 1.78 (0.88-3.63)  | 8.30E-01                         | 5.44E-01         | 1.00E-00   |
| rs3134689  | HCRTR2      | 6   | 55,162,711  | 0.20             | Add                        | 1.04 (0.69-1.55)           | 1.67 (0.93-3)        | 1.64 (0.84-3.22)  | 9.69E-01                         | 9.85E-01         | 1.00E-00   |
| rs9475210  | HCRTR2      | 6   | 55,210,529  | 0.06             | Dom                        | 0.77 (0.32-1.8)            | 1.53 (0.92-2.54)     | 3.73 (0.69-20.11) | 3.20E-01                         | 5.50E-01         | 1.00E-00   |
| rs2653350  | HCRTR2      | 6   | 55,252,061  | 0.43             | Dom                        | 1.03 (0.62-1.71)           | 1.53 (0.66-3.57)     | 1.73 (0.96-3.1)   | 8.22E-01                         | 9.67E-01         | 1.00E-00   |
| rs9396056  | HCRTR2      | 6   | 55,141,716  | 0.39             | Dom                        | 1.01 (0.62-1.67)           | 2.38 (1.07-5.3)      | 1.34 (0.73-2.45)  | 2.61E-01                         | 5.24E-01         | 1.00E-00   |
| rs3122153  | HCRTR2      | 6   | 55,184,612  | 0.22             | Dom                        | 0.76 (0.46-1.26)           | 1.61 (0.89-2.92)     | 1.79 (0.78-4.07)  | 8.43E-01                         | 5.66E-01         | 1.00E-00   |
| rs2811228  | HCRTR2      | 6   | 55,260,768  | 0.38             | Add                        | 1.09 (0.66-1.78)           | 1.55 (0.75-3.19)     | 1.68 (1.02-2.79)  | 7.83E-01                         | 8.98E-01         | 1.00E-00   |
| rs2653342  | HCRTR2      | 6   | 55,239,096  | 0.15             | Add                        | 1.21 (0.76-1.91)           | 1.53 (0.86-2.72)     | 1.99 (0.91-4.31)  | 5.80E-01                         | 6.06E-01         | 1.00E-00   |
| rs2653349  | HCRTR2      | 6   | 55,250,296  | 0.19             | Add                        | 1.18 (0.78-1.79)           | 1.49 (0.83-2.7)      | 1.95 (0.98-3.88)  | 5.31E-01                         | 5.94E-01         | 1.00E-00   |
| rs9357845  | HCRTR2      | 6   | 55,142,145  | 0.39             | Dom                        | 0.84 (0.52-1.37)           | 1.52 (0.71-3.28)     | 1.75 (0.94-3.25)  | 7.81E-01                         | 7.72E-01         | 1.00E-00   |
| rs9464203  | HCRTR2      | 6   | 55,145,083  | 0.21             | Dom                        | 1.12 (0.69-1.83)           | 1.63 (0.88-3.01)     | 1.7 (0.79-3.66)   | 9.33E-01                         | 8.85E-01         | 1.00E-00   |
| rs9382460  | HCRTR2      | 6   | 55,145,443  | 0.19             | Dom                        | 1.04 (0.63-1.71)           | 1.9 (1.04-3.45)      | 1.28 (0.56-2.91)  | 4.49E-01                         | 7.50E-01         | 1.00E-00   |
| rs9367621  | HCRTR2      | 6   | 55,148,249  | 0.45             | Dom                        | 1.3 (0.76-2.22)            | 1.76 (0.7-4.45)      | 1.62 (0.92-2.84)  | 8.79E-01                         | 6.30E-01         | 1.00E-00   |
| rs6927478  | HCRTR2      | 6   | 55,152,345  | 0.39             | Dom                        | 1.15 (0.7-1.9)             | 2 (0.89-4.48)        | 1.5 (0.82-2.74)   | 5.79E-01                         | 7.58E-01         | 1.00E-00   |
| rs7775745  | HCRTR2      | 6   | 55,158,466  | 0.45             | Dom                        | 1.19 (0.69-2.07)           | 1.79 (0.68-4.71)     | 1.62 (0.93-2.82)  | 8.56E-01                         | 8.19E-01         | 1.00E-00   |
| rs4712099  | HCRTR2      | 6   | 55,163,157  | 0.17             | Dom                        | 0.96 (0.57-1.61)           | 1.54 (0.86-2.74)     | 1.89 (0.79-4.54)  | 6.97E-01                         | 9.22E-01         | 1.00E-00   |

**Supplemental Table 2: SNP-Specific Results for Abstinence Rates at 6-Month Follow-up**

| SNP        | Gene   | Chr | Position   | MAF <sup>a</sup> | Genetic Model <sup>b</sup> | SNP Odds Ratio<br>(95% CI) | Treatment Odds Ratio |                  | Test of Interaction <sup>c</sup> | LRT <sup>d</sup> |            |
|------------|--------|-----|------------|------------------|----------------------------|----------------------------|----------------------|------------------|----------------------------------|------------------|------------|
|            |        |     |            |                  |                            |                            | WT (95% CI)          | Variant (95% CI) |                                  | Observed P       | Adjusted P |
| rs4236127  | HCRTR2 | 6   | 55,164,136 | 0.18             | Dom                        | 1.01 (0.61-1.68)           | 1.55 (0.86-2.8)      | 1.87 (0.81-4.34) | 7.21E-01                         | 9.34E-01         | 1.00E-00   |
| rs9475195  | HCRTR2 | 6   | 55,168,977 | 0.39             | Dom                        | 1.09 (0.66-1.79)           | 1.45 (0.65-3.22)     | 1.79 (0.98-3.28) | 6.79E-01                         | 8.52E-01         | 1.00E-00   |
| rs3134696  | HCRTR2 | 6   | 55,170,060 | 0.20             | Dom                        | 1.01 (0.61-1.66)           | 1.56 (0.86-2.84)     | 1.85 (0.83-4.17) | 7.39E-01                         | 9.44E-01         | 1.00E-00   |
| rs3122148  | HCRTR2 | 6   | 55,173,948 | 0.20             | Dom                        | 0.98 (0.6-1.62)            | 1.58 (0.87-2.88)     | 1.82 (0.81-4.08) | 7.89E-01                         | 9.64E-01         | 1.00E-00   |
| rs10498801 | HCRTR2 | 6   | 55,174,923 | 0.18             | Dom                        | 1.02 (0.61-1.69)           | 1.56 (0.87-2.81)     | 1.87 (0.81-4.34) | 7.29E-01                         | 9.37E-01         | 1.00E-00   |
| rs12111375 | HCRTR2 | 6   | 55,176,953 | 0.48             | Add                        | 0.74 (0.4-1.38)            | 1.58 (0.6-4.17)      | 1.49 (0.89-2.49) | 9.24E-01                         | 6.39E-01         | 1.00E-00   |
| rs9367622  | HCRTR2 | 6   | 55,177,132 | 0.15             | Add                        | 1.07 (0.67-1.7)            | 1.57 (0.9-2.73)      | 1.93 (0.86-4.35) | 6.63E-01                         | 8.75E-01         | 1.00E-00   |
| rs3134705  | HCRTR2 | 6   | 55,182,315 | 0.40             | Dom                        | 0.89 (0.55-1.45)           | 1.63 (0.75-3.52)     | 1.67 (0.9-3.1)   | 9.55E-01                         | 9.00E-01         | 1.00E-00   |
| rs4142972  | HCRTR2 | 6   | 55,184,896 | 0.18             | Dom                        | 0.9 (0.54-1.51)            | 1.55 (0.87-2.76)     | 1.93 (0.81-4.6)  | 6.81E-01                         | 8.69E-01         | 1.00E-00   |
| rs3122154  | HCRTR2 | 6   | 55,186,417 | 0.21             | Dom                        | 1.06 (0.65-1.74)           | 1.78 (0.96-3.28)     | 1.48 (0.68-3.22) | 7.14E-01                         | 9.18E-01         | 1.00E-00   |
| rs12662510 | HCRTR2 | 6   | 55,187,850 | 0.15             | Dom                        | 0.9 (0.52-1.57)            | 1.55 (0.89-2.7)      | 2.15 (0.82-5.65) | 5.66E-01                         | 8.13E-01         | 1.00E-00   |
| rs9370403  | HCRTR2 | 6   | 55,189,315 | 0.19             | Add                        | 0.9 (0.57-1.43)            | 1.8 (0.98-3.3)       | 1.51 (0.7-3.28)  | 7.16E-01                         | 8.34E-01         | 1.00E-00   |
| rs9382467  | HCRTR2 | 6   | 55,198,914 | 0.46             | Dom                        | 1 (0.59-1.69)              | 1.45 (0.6-3.5)       | 1.75 (0.98-3.11) | 7.31E-01                         | 9.41E-01         | 1.00E-00   |
| rs3122169  | HCRTR2 | 6   | 55,221,370 | 0.18             | Dom                        | 1.1 (0.71-1.69)            | 1.6 (0.88-2.92)      | 1.77 (0.78-4)    | 7.79E-01                         | 8.80E-01         | 1.00E-00   |
| rs2653343  | HCRTR2 | 6   | 55,241,285 | 0.19             | Add                        | 1.17 (0.77-1.77)           | 1.5 (0.83-2.72)      | 1.92 (0.97-3.82) | 5.62E-01                         | 6.36E-01         | 1.00E-00   |
| rs2134294  | HCRTR2 | 6   | 55,242,206 | 0.44             | Add                        | 0.95 (0.68-1.33)           | 1.59 (0.74-3.41)     | 1.66 (1.02-2.7)  | 9.05E-01                         | 9.47E-01         | 1.00E-00   |
| rs6929837  | HCRTR2 | 6   | 55,244,576 | 0.19             | Add                        | 1.17 (0.77-1.77)           | 1.5 (0.83-2.72)      | 1.92 (0.97-3.82) | 5.62E-01                         | 6.36E-01         | 1.00E-00   |
| rs10456702 | HCRTR2 | 6   | 55,261,975 | 0.45             | Dom                        | 1.06 (0.63-1.79)           | 1.2 (0.5-2.89)       | 1.9 (1.07-3.39)  | 3.91E-01                         | 6.59E-01         | 1.00E-00   |
| rs2653357  | HCRTR2 | 6   | 55,264,698 | 0.38             | Add                        | 0.96 (0.68-1.35)           | 1.52 (0.75-3.11)     | 1.69 (1.02-2.81) | 7.69E-01                         | 9.35E-01         | 1.00E-00   |

<sup>a</sup> The minor allele frequency was calculated using subjects in our study sample. <sup>b</sup> For each SNP, dominant and additive genetic models were fitted and the model yielding the lower adjusted p-value was selected. <sup>c</sup> The Test of Interaction is the observed p-value from a test of heterogeneity for the treatment odds ratios. <sup>d</sup> The Likelihood Ratio Test Observed P-value was obtained using a joint 2-df test combining the genetic marginal effect and the gene-treatment interaction effect. Adjusted P-values were estimated by accounting for the correlation between observed SNPs within respective gene regions. This adjustment was also used when selecting a genetic model. <sup>e</sup> After adjustment, rs2072661 and rs2072660 reached pathway level significance ( $p < 0.0009$ ) at 6-month follow-up.



**Supplemental Table 3: SNP Information**

| SNP        | Gene    | Chr | Position    | Major Allele | Minor Allele | MAF <sup>a</sup> | Call Rate <sup>b</sup> | Chromosomal Location <sup>c</sup> | Amino Acid Change <sup>d</sup> | LD Bin ( $r^2 > 0.80$ ) <sup>e</sup>                                                                                       | Analysis Sample <sup>f</sup> |
|------------|---------|-----|-------------|--------------|--------------|------------------|------------------------|-----------------------------------|--------------------------------|----------------------------------------------------------------------------------------------------------------------------|------------------------------|
| rs12608148 | ADCYAP1 | 18  | 879,159     | G            | A            | 0.272            | 0.998                  | flanking 5'UTR                    | NA                             | rs11081414, rs2846578, rs2846581, rs2846583, rs2846584, rs6506614, rs8093310                                               | T                            |
| rs4797325  | ADCYAP1 | 18  | 879,905     | G            | A            | 0.404            | 0.978                  | flanking 5'UTR                    | NA                             | rs9304023                                                                                                                  | T                            |
| rs1599789  | ADCYAP1 | 18  | 881,312     | A            | G            | 0.261            | 1.000                  | flanking 5'UTR                    | NA                             | rs10775442, rs10853365, rs4797328, rs4798684, rs7241142                                                                    | T                            |
| rs2040176  | ADCYAP1 | 18  | 882,467     | T            | C            | 0.120            | 1.000                  | flanking 5'UTR                    | NA                             | rs2846579, rs2846808                                                                                                       | T                            |
| rs1916610  | ADCYAP1 | 18  | 882,847     | C            | T            | 0.469            | 1.000                  | flanking 5'UTR                    | NA                             | rs11877293, rs2040177                                                                                                      | T                            |
| rs11081411 | ADCYAP1 | 18  | 883,205     | A            | G            | 0.164            | 0.986                  | flanking 5'UTR                    | NA                             | rs12968039                                                                                                                 | T                            |
| rs11665625 | ADCYAP1 | 18  | 890,332     | G            | A            | 0.457            | 1.000                  | flanking 5'UTR                    | NA                             | rs9957039                                                                                                                  | T                            |
| rs12961210 | ADCYAP1 | 18  | 890,523     | T            | G            | 0.321            | 0.998                  | flanking 5'UTR                    | NA                             | rs12967004                                                                                                                 | T                            |
| rs9635870  | ADCYAP1 | 18  | 890,765     | G            | A            | 0.294            | 0.976                  | flanking 5'UTR                    | NA                             | NA                                                                                                                         | T                            |
| rs2846579  | ADCYAP1 | 18  | 891,897     | C            | T            | 0.121            | 1.000                  | flanking 5'UTR                    | NA                             | rs2040176, rs2846808                                                                                                       | T                            |
| rs2846583  | ADCYAP1 | 18  | 892,965     | A            | T            | 0.281            | 1.000                  | flanking 5'UTR                    | NA                             | rs11081414, rs12608148, rs2846578, rs2846581, rs2846584, rs6506614, rs8093310                                              | T                            |
| rs2846584  | ADCYAP1 | 18  | 894,054     | C            | T            | 0.276            | 1.000                  | flanking 5'UTR                    | NA                             | rs11081414, rs12608148, rs2846578, rs2846581, rs2846583, rs6506614, rs8093310                                              | T                            |
| rs8192595  | ADCYAP1 | 18  | 897,521     | A            | G            | 0.086            | 1.000                  | intron                            | NA                             | NA                                                                                                                         | T                            |
| rs11659736 | ADCYAP1 | 18  | 905,937     | C            | T            | 0.362            | 1.000                  | flanking 3'UTR                    | NA                             | NA                                                                                                                         | T                            |
| rs7228988  | ADCYAP1 | 18  | 907,957     | A            | G            | 0.308            | 0.998                  | flanking 3'UTR                    | NA                             | rs11663168, rs11663363, rs17501755, rs17501915, rs17579719                                                                 | T                            |
| rs11663172 | ADCYAP1 | 18  | 910,173     | G            | A            | 0.392            | 0.998                  | flanking 3'UTR                    | NA                             | rs11081461, rs12373400, rs12955513, rs4638663                                                                              | T                            |
| rs17501755 | ADCYAP1 | 18  | 910,497     | T            | C            | 0.300            | 0.998                  | flanking 3'UTR                    | NA                             | rs11663168, rs11663363, rs17501915, rs17579719, rs7228988                                                                  | T                            |
| rs12373400 | ADCYAP1 | 18  | 913,096     | A            | G            | 0.377            | 0.998                  | flanking 3'UTR                    | NA                             | rs11663172, rs11081461, rs12955513, rs4638663                                                                              | T                            |
| rs10853372 | ADCYAP1 | 18  | 913,261     | G            | A            | 0.411            | 1.000                  | flanking 3'UTR                    | NA                             | rs4798767                                                                                                                  | T                            |
| rs16952813 | ADCYAP1 | 18  | 914,630     | G            | A            | 0.077            | 1.000                  | flanking 3'UTR                    | NA                             | rs10502291, rs11660066, rs11660111, rs11664132                                                                             | T                            |
| rs17501915 | ADCYAP1 | 18  | 915,250     | G            | A            | 0.300            | 0.998                  | flanking 3'UTR                    | NA                             | rs11663168, rs11663363, rs17501755, rs17579719, rs7228988                                                                  | T                            |
| rs4798767  | ADCYAP1 | 18  | 917,475     | A            | T            | 0.415            | 1.000                  | flanking 3'UTR                    | NA                             | rs10853372                                                                                                                 | T                            |
| rs11660066 | ADCYAP1 | 18  | 918,035     | C            | T            | 0.077            | 1.000                  | flanking 3'UTR                    | NA                             | rs10502291, rs11660111, rs11664132, rs16952813                                                                             | T                            |
| rs11214589 | ANKK1   | 11  | 112,750,258 | G            | A            | 0.464            | 0.945                  | flanking 3'UTR                    | NA                             | rs754672                                                                                                                   | T                            |
| rs4938010  | ANKK1   | 11  | 112,750,776 | A            | G            | 0.150            | 1.000                  | flanking 3'UTR                    | NA                             | rs10891541, rs12224538, rs4590907, rs4938011, rs4938014                                                                    | T                            |
| rs754672   | ANKK1   | 11  | 112,754,346 | T            | C            | 0.494            | 0.998                  | flanking 3'UTR                    | NA                             | rs6277, rs10891544, rs10891549, rs11214589, rs11214594, rs11214596, rs12360992, rs1554929, rs17600713, rs7107223, rs877137 | T                            |

**Supplemental Table 3: SNP Information**

| SNP        | Gene  | Chr | Position    | Major Allele | Minor Allele | MAF <sup>a</sup> | Call Rate <sup>b</sup> | Chromosomal Location <sup>c</sup> | Amino Acid Change <sup>d</sup> | LD Bin ( $r^2 > 0.80$ ) <sup>e</sup>                                                                                                                                                                              | Analysis Sample <sup>f</sup> |
|------------|-------|-----|-------------|--------------|--------------|------------------|------------------------|-----------------------------------|--------------------------------|-------------------------------------------------------------------------------------------------------------------------------------------------------------------------------------------------------------------|------------------------------|
| rs3897584  | ANKK1 | 11  | 112,754,935 | C            | G            | 0.348            | 0.993                  | flanking 3'UTR                    | NA                             | rs10891546, rs17115439, rs4601821, rs4938012, rs4938013, rs4938015, rs7945132, rs877138                                                                                                                           | T                            |
| rs10891545 | ANKK1 | 11  | 112,763,275 | T            | C            | 0.145            | 1.000                  | flanking 5'UTR                    | NA                             | rs10891541, rs12224538, rs4590907, rs4938014                                                                                                                                                                      | T                            |
| rs4938012  | ANKK1 | 11  | 112,764,864 | G            | A            | 0.345            | 0.998                  | intron                            | NA                             | rs10891546, rs17115439, rs3897584, rs4601821, rs4938013, rs4938015, rs7123797, rs7945132, rs877138                                                                                                                | T                            |
| rs7123797  | ANKK1 | 11  | 112,767,781 | G            | A            | 0.356            | 0.998                  | intron                            | NA                             | rs10891546, rs17115439, rs4601821, rs4938012, rs4938013, rs4938015, rs7945132                                                                                                                                     | T                            |
| rs12360992 | ANKK1 | 11  | 112,768,110 | C            | A            | 0.488            | 0.998                  | intron                            | NA                             | rs6277, rs10891544, rs10891549, rs11214594, rs11214596, rs1554929, rs17600713, rs7107223, rs754672, rs877137                                                                                                      | T                            |
| rs4590907  | ANKK1 | 11  | 112,768,580 | T            | G            | 0.140            | 1.000                  | intron                            | NA                             | rs10891541, rs10891545, rs12224538, rs4938010, rs4938014                                                                                                                                                          | T                            |
| rs17115439 | ANKK1 | 11  | 112,769,482 | C            | T            | 0.349            | 1.000                  | coding                            | NA                             | rs10891546, rs3897584, rs4601821, rs4938012, rs4938013, rs4938015, rs7123797, rs7945132, rs877138                                                                                                                 | T                            |
| rs11214596 | ANKK1 | 11  | 112,769,721 | G            | C            | 0.488            | 0.998                  | intron                            | NA                             | rs6277, rs10891544, rs10891549, rs11214594, rs12360992, rs1554929, rs17600713, rs7107223, rs754672, rs877137                                                                                                      | T                            |
| rs4938015  | ANKK1 | 11  | 112,769,854 | C            | T            | 0.347            | 0.998                  | intron                            | NA                             | rs10891546, rs17115439, rs3897584, rs4601821, rs4938012, rs4938013, rs7123797, rs7945132, rs877138                                                                                                                | T                            |
| rs7118900  | ANKK1 | 11  | 112,772,031 | G            | A            | 0.198            | 0.998                  | coding                            | A239T<br>(NP_848605)           | rs1800497                                                                                                                                                                                                         | T                            |
| rs4938016  | ANKK1 | 11  | 112,775,225 | C            | G            | 0.318            | 1.000                  | coding                            | G442R<br>(NP_848605)           | rs1003641, rs11214598, rs1124493, rs2242592, rs2587550, rs2734841, rs2734842, rs2859545, rs6275, rs6276, rs6279                                                                                                   | T                            |
| rs2734849  | ANKK1 | 11  | 112,775,370 | A            | G            | 0.486            | 0.995                  | coding                            | H490R<br>(NP_848605)           | rs11604671                                                                                                                                                                                                        | T                            |
| rs2734848  | ANKK1 | 11  | 112,775,584 | T            | C            | 0.170            | 0.954                  | coding                            | Y561Y<br>(NP_848605)           | rs2234689                                                                                                                                                                                                         | T                            |
| rs7104979  | ANKK1 | 11  | 112,775,688 | C            | NA           | 0.000            | 1.000                  | coding                            | P596L<br>(NP_848605)           | NA                                                                                                                                                                                                                | NA                           |
| rs1800497  | ANKK1 | 11  | 112,776,038 | G            | A            | 0.215            | 0.959                  | coding                            | E713K<br>(NP_848605)           | rs7118900                                                                                                                                                                                                         | G                            |
| rs11214601 | ANKK1 | 11  | 112,777,972 | C            | T            | 0.180            | 1.000                  | flanking 3'UTR                    | NA                             | rs1076560, rs1079594, rs1079595, rs1079596, rs1079597, rs1079727, rs11214599, rs11214607, rs1124491, rs1125394, rs2075654, rs2283265, rs2471851, rs2471854, rs2471857, rs2734836, rs4648319, rs7103679, rs7350522 | T                            |

**Supplemental Table 3: SNP Information**

| SNP        | Gene  | Chr | Position    | Major Allele | Minor Allele | MAF <sup>a</sup> | Call Rate <sup>b</sup> | Chromosomal Location <sup>c</sup> | Amino Acid Change <sup>d</sup> | LD Bin ( $r^2 > 0.80$ ) <sup>e</sup>                                                                                                                                                                               | Analysis Sample <sup>f</sup> |
|------------|-------|-----|-------------|--------------|--------------|------------------|------------------------|-----------------------------------|--------------------------------|--------------------------------------------------------------------------------------------------------------------------------------------------------------------------------------------------------------------|------------------------------|
| rs1003641  | ANKK1 | 11  | 112,778,846 | G            | A            | 0.297            | 0.998                  | flanking 3'UTR                    | NA                             | rs11214598, rs1124493, rs2242592, rs2587550, rs2734841, rs2734842, rs2859545, rs4938016, rs6275, rs6276, rs6279                                                                                                    | T                            |
| rs12422191 | ANKK1 | 11  | 112,779,220 | G            | A            | 0.089            | 0.998                  | flanking 3'UTR                    | NA                             | NA                                                                                                                                                                                                                 | T                            |
| rs10891549 | ANKK1 | 11  | 112,783,657 | C            | T            | 0.478            | 0.983                  | flanking 3'UTR                    | NA                             | rs6277, rs10891544, rs11214594, rs11214596, rs11604671, rs12360992, rs1554929, rs17600713, rs7107223, rs754672, rs877137                                                                                           | T                            |
| rs2734841  | ANKK1 | 11  | 112,786,986 | C            | A            | 0.297            | 1.000                  | intron                            | NA                             | rs1003641, rs11214598, rs1124493, rs2242592, rs2587550, rs2734842, rs2859545, rs4938016, rs6275, rs6276, rs6279                                                                                                    | T                            |
| rs1124491  | ANKK1 | 11  | 112,787,300 | G            | A            | 0.180            | 1.000                  | intron                            | NA                             | rs1076560, rs1079594, rs1079595, rs1079596, rs1079597, rs1079727, rs11214599, rs11214601, rs11214607, rs1125394, rs2075654, rs2283265, rs2471851, rs2471854, rs2471857, rs2734836, rs4648319, rs7103679, rs7350522 | T                            |
| rs1124492  | ANKK1 | 11  | 112,787,485 | C            | A            | 0.111            | 0.998                  | intron                            | NA                             | rs17115583, rs4436578, rs4620755                                                                                                                                                                                   | T                            |
| rs6277     | ANKK1 | 11  | 112,788,669 | A            | G            | 0.478            | 0.983                  | coding                            | P290P (NP_057658)              | rs10891544, rs10891549, rs11214594, rs11214596, rs12360992, rs1554929, rs17600713, rs7107223, rs754672, rs877137                                                                                                   | T                            |
| rs1076560  | ANKK1 | 11  | 112,788,898 | C            | A            | 0.182            | 1.000                  | intron                            | NA                             | rs1079594, rs1079595, rs1079596, rs1079597, rs1079727, rs11214599, rs11214601, rs11214607, rs1124491, rs1125394, rs2075654, rs2283265, rs2471851, rs2471854, rs2471857, rs2734836, rs4648319, rs7103679, rs7350522 | T                            |
| rs12419948 | BDNF  | 11  | 27,623,560  | T            | A            | 0.184            | 0.995                  | flanking 3'UTR                    | NA                             | rs6265, rs10501087, rs10767664, rs11030104, rs16917237, rs2030323, rs2049045, rs6484320, rs7103411, rs925947, rs988748                                                                                             | T                            |
| rs1519479  | BDNF  | 11  | 27,624,107  | T            | C            | 0.472            | 1.000                  | flanking 3'UTR                    | NA                             | rs10767665, rs11030101, rs2030324, rs2049046, rs2203877, rs7103873, rs7934165                                                                                                                                      | T                            |
| rs11030098 | BDNF  | 11  | 27,628,869  | C            | G            | 0.004            | 1.000                  | flanking 3'UTR                    | NA                             | NA                                                                                                                                                                                                                 | NA                           |
| rs1519480  | BDNF  | 11  | 27,632,288  | T            | C            | 0.288            | 1.000                  | flanking 3'UTR                    | NA                             | rs1013402, rs10767658, rs11030108, rs11030119, rs11030121, rs1401635, rs7124442, rs7127507, rs925946, rs962369                                                                                                     | T                            |
| rs7124442  | BDNF  | 11  | 27,633,617  | T            | C            | 0.274            | 0.981                  | 3'UTR                             | NA                             | rs1013402, rs10767658, rs11030108, rs11030119, rs11030121, rs1401635, rs1519480, rs7127507, rs925946, rs962369                                                                                                     | T                            |
| rs6265     | BDNF  | 11  | 27,636,492  | C            | T            | 0.181            | 1.000                  | coding                            | M66V (NP_733931)               | rs10501087, rs11030104, rs12419948, rs16917237, rs2049045, rs925947                                                                                                                                                | T                            |

**Supplemental Table 3: SNP Information**

| SNP        | Gene | Chr | Position   | Major Allele | Minor Allele | MAF <sup>a</sup> | Call Rate <sup>b</sup> | Chromosomal Location <sup>c</sup> | Amino Acid Change <sup>d</sup> | LD Bin ( $r^2 > 0.80$ ) <sup>e</sup>                                                                                   | Analysis Sample <sup>f</sup> |
|------------|------|-----|------------|--------------|--------------|------------------|------------------------|-----------------------------------|--------------------------------|------------------------------------------------------------------------------------------------------------------------|------------------------------|
| rs11030101 | BDNF | 11  | 27,637,320 | T            | A            | 0.482            | 1.000                  | flanking 5'UTR                    | NA                             | rs10767665, rs10835210, rs1519479, rs2030324, rs2049046, rs2203877, rs7103873, rs7931247, rs7934165                    | T                            |
| rs11030104 | BDNF | 11  | 27,641,093 | A            | G            | 0.193            | 1.000                  | flanking 5'UTR                    | NA                             | rs6265, rs10501087, rs10767664, rs12419948, rs16917237, rs2030323, rs2049045, rs6484320, rs7103411, rs925947, rs988748 | T                            |
| rs1401635  | BDNF | 11  | 27,650,567 | G            | C            | 0.273            | 1.000                  | flanking 5'UTR                    | NA                             | rs1013402, rs10767658, rs11030108, rs11030119, rs11030121, rs1519480, rs7124442, rs7127507, rs925946, rs962369         | T                            |
| rs12291063 | BDNF | 11  | 27,650,677 | T            | C            | 0.004            | 1.000                  | flanking 5'UTR                    | NA                             | NA                                                                                                                     | NA                           |
| rs2049045  | BDNF | 11  | 27,650,817 | G            | C            | 0.179            | 1.000                  | flanking 5'UTR                    | NA                             | rs6265, rs10501087, rs11030104, rs12419948, rs16917237, rs925947                                                       | T                            |
| rs11030107 | BDNF | 11  | 27,651,411 | A            | G            | 0.228            | 0.983                  | flanking 5'UTR                    | NA                             | rs10835211, rs11030102, rs17309874                                                                                     | T                            |
| rs10835210 | BDNF | 11  | 27,652,486 | C            | A            | 0.480            | 1.000                  | flanking 5'UTR                    | NA                             | rs11030101, rs2049046, rs2203877, rs7103873                                                                            | T                            |
| rs7103873  | BDNF | 11  | 27,656,893 | C            | G            | 0.476            | 1.000                  | flanking 5'UTR                    | NA                             | rs10767665, rs10835210, rs11030101, rs1519479, rs2030324, rs2049046, rs2203877, rs7931247, rs7934165                   | T                            |
| rs6484320  | BDNF | 11  | 27,659,764 | A            | T            | 0.194            | 1.000                  | flanking 3'UTR                    | NA                             | rs10501087, rs10767664, rs11030104, rs12419948, rs16917237, rs2030323, rs7103411, rs925947, rs988748                   | T                            |
| rs1013402  | BDNF | 11  | 27,668,957 | A            | G            | 0.272            | 0.998                  | flanking 3'UTR                    | NA                             | rs10767658, rs11030108, rs11030119, rs11030121, rs1401635, rs1519480, rs7124442, rs7127507, rs925946, rs962369         | T                            |
| rs988748   | BDNF | 11  | 27,681,321 | G            | C            | 0.195            | 1.000                  | flanking 5'UTR                    | NA                             | rs10501087, rs10767664, rs11030104, rs12419948, rs16917237, rs2030323, rs6484320, rs7103411, rs925947                  | T                            |
| rs10767664 | BDNF | 11  | 27,682,562 | A            | T            | 0.192            | 0.998                  | flanking 5'UTR                    | NA                             | rs10501087, rs11030104, rs12419948, rs16917237, rs2030323, rs6484320, rs7103411, rs925947, rs988748                    | T                            |
| rs2030324  | BDNF | 11  | 27,683,491 | G            | A            | 0.464            | 1.000                  | flanking 5'UTR                    | NA                             | rs10767665, rs11030101, rs1519479, rs2049046, rs2203877, rs7103873, rs7931247, rs7934165                               | T                            |
| rs11030119 | BDNF | 11  | 27,684,678 | G            | A            | 0.259            | 1.000                  | flanking 5'UTR                    | NA                             | rs1013402, rs10767658, rs11030108, rs11030121, rs1401635, rs1519480, rs7124442, rs7127507, rs925946, rs962369          | T                            |
| rs7934165  | BDNF | 11  | 27,688,559 | A            | G            | 0.464            | 0.993                  | flanking 5'UTR                    | NA                             | rs10767665, rs11030101, rs1519479, rs2030324, rs2049046, rs2203877, rs7103873, rs7931247                               | T                            |
| rs11030121 | BDNF | 11  | 27,692,783 | C            | T            | 0.270            | 1.000                  | flanking 3'UTR                    | NA                             | rs1013402, rs10767658, rs11030108, rs11030119, rs1401635, rs1519480, rs7124442, rs7127507, rs925946, rs962369          | T                            |
| rs12273363 | BDNF | 11  | 27,701,435 | T            | C            | 0.160            | 0.988                  | flanking 5'UTR                    | NA                             | rs12288512, rs17309930                                                                                                 | T                            |
| rs908867   | BDNF | 11  | 27,702,340 | C            | T            | 0.097            | 0.998                  | flanking 5'UTR                    | NA                             | rs11030123                                                                                                             | T                            |
| rs1491850  | BDNF | 11  | 27,706,301 | T            | C            | 0.365            | 0.998                  | flanking 5'UTR                    | NA                             | NA                                                                                                                     | T                            |

**Supplemental Table 3: SNP Information**

| SNP        | Gene    | Chr | Position    | Major Allele | Minor Allele | MAF <sup>a</sup> | Call Rate <sup>b</sup> | Chromosomal Location <sup>c</sup> | Amino Acid Change <sup>d</sup> | LD Bin (r <sup>2</sup> > 0.80) <sup>e</sup>                                                        | Analysis Sample <sup>f</sup> |
|------------|---------|-----|-------------|--------------|--------------|------------------|------------------------|-----------------------------------|--------------------------------|----------------------------------------------------------------------------------------------------|------------------------------|
| rs2049048  | BDNF    | 11  | 27,707,162  | G            | A            | 0.143            | 1.000                  | flanking 5'UTR                    | NA                             | NA                                                                                                 | T                            |
| rs12244716 | CALCYON | 10  | 134,978,372 | G            | C            | 0.138            | 0.998                  | flanking 3'UTR                    | NA                             | rs11101694, rs12250582, rs2105341                                                                  | T                            |
| rs2275723  | CALCYON | 10  | 134,989,625 | G            | A            | 0.107            | 0.993                  | intron                            | NA                             | NA                                                                                                 | T                            |
| rs2298122  | CALCYON | 10  | 134,991,562 | T            | G            | 0.194            | 0.945                  | intron                            | NA                             | rs7085530                                                                                          | G                            |
| rs11101694 | CALCYON | 10  | 134,996,704 | T            | C            | 0.136            | 0.938                  | intron                            | NA                             | rs12244716, rs12250582, rs2105341                                                                  | G                            |
| rs10776672 | CALCYON | 10  | 135,007,945 | A            | G            | 0.109            | 0.998                  | flanking 5'UTR                    | NA                             | NA                                                                                                 | T                            |
| rs4838721  | CALCYON | 10  | 135,010,940 | T            | C            | 0.189            | 1.000                  | intron                            | NA                             | NA                                                                                                 | T                            |
| rs2110113  | CALM1   | 14  | 89,922,506  | A            | G            | 0.116            | 1.000                  | flanking 5'UTR                    | NA                             | rs12147703, rs2110114, rs2159912, rs2300497, rs2300502, rs6575130, rs6575131, rs7144433, rs9806062 | T                            |
| rs3814847  | CALM1   | 14  | 89,931,789  | C            | G            | 0.369            | 1.000                  | flanking 5'UTR                    | NA                             | rs2268433                                                                                          | T                            |
| rs12885713 | CALM1   | 14  | 89,933,110  | T            | C            | 0.459            | 0.995                  | flanking 5'UTR                    | NA                             | NA                                                                                                 | T                            |
| rs3213718  | CALM1   | 14  | 89,939,666  | T            | C            | 0.436            | 1.000                  | intron                            | NA                             | rs12891145, rs2300496, rs2300500, rs3179089                                                        | T                            |
| rs5871     | CALM1   | 14  | 89,941,231  | T            | C            | 0.075            | 0.998                  | 3'UTR                             | NA                             | rs17126689                                                                                         | T                            |
| rs3814843  | CALM1   | 14  | 89,942,766  | T            | G            | 0.038            | 1.000                  | 3'UTR                             | NA                             | NA                                                                                                 | NA                           |
| rs8006462  | CALM1   | 14  | 89,948,429  | C            | T            | 0.349            | 0.998                  | flanking 3'UTR                    | NA                             | NA                                                                                                 | T                            |
| rs2896135  | CALM1   | 14  | 89,950,493  | A            | G            | 0.421            | 1.000                  | flanking 3'UTR                    | NA                             | NA                                                                                                 | T                            |
| rs876259   | CALM1   | 14  | 89,952,709  | T            | G            | 0.072            | 1.000                  | flanking 3'UTR                    | NA                             | rs10129175, rs12433818, rs12895068, rs4904690                                                      | T                            |
| rs12895068 | CALM1   | 14  | 89,957,031  | A            | T            | 0.073            | 0.998                  | flanking 3'UTR                    | NA                             | rs10129175, rs12433818, rs4904690, rs876259                                                        | T                            |
| rs2303928  | CDK5    | 7   | 150,370,263 | C            | G            | 0.396            | 1.000                  | intron                            | NA                             | NA                                                                                                 | T                            |
| rs2069459  | CDK5    | 7   | 150,382,523 | C            | A            | 0.376            | 0.998                  | intron                            | NA                             | NA                                                                                                 | T                            |
| rs891507   | CDK5    | 7   | 150,382,999 | C            | T            | 0.155            | 0.993                  | intron                            | NA                             | rs1549759, rs2288645                                                                               | G                            |
| rs2069454  | CDK5    | 7   | 150,383,915 | C            | G            | 0.140            | 0.930                  | intron                            | NA                             | NA                                                                                                 | T                            |
| rs2069443  | CDK5    | 7   | 150,386,106 | T            | G            | 0.248            | 1.000                  | flanking 5'UTR                    | NA                             | rs1549760                                                                                          | T                            |
| rs1549760  | CDK5    | 7   | 150,386,772 | C            | T            | 0.213            | 1.000                  | flanking 5'UTR                    | NA                             | rs2069443, rs2069456, rs2303929                                                                    | T                            |
| rs3793336  | CDK5    | 7   | 150,393,804 | A            | G            | 0.150            | 0.719                  | intron                            | NA                             | rs1549759                                                                                          | T                            |
| rs2303933  | CDK5    | 7   | 150,397,732 | G            | A            | 0.427            | 1.000                  | intron                            | NA                             | NA                                                                                                 | T                            |
| rs2303937  | CDK5    | 7   | 150,399,719 | G            | A            | 0.446            | 1.000                  | coding                            | T734T<br>(NP_003031)           | NA                                                                                                 | T                            |
| rs11765015 | CDK5    | 7   | 150,401,765 | G            | A            | 0.263            | 1.000                  | intron                            | NA                             | NA                                                                                                 | T                            |
| rs4733065  | CHRNA2  | 8   | 27,363,921  | G            | A            | 0.447            | 0.990                  | intron                            | NA                             | rs1560344, rs2292974, rs2292975, rs748283, rs751019, rs752993                                      | T                            |
| rs2278319  | CHRNA2  | 8   | 27,364,878  | C            | T            | 0.240            | 1.000                  | intron                            | NA                             | rs1019832, rs2280376, rs735421, rs891394                                                           | T                            |
| rs1106359  | CHRNA2  | 8   | 27,365,256  | T            | C            | 0.420            | 1.000                  | intron                            | NA                             | rs10093964, rs1057137, rs2271920, rs7007145, rs751018, rs7831523, rs7846626, rs919494              | T                            |

**Supplemental Table 3: SNP Information**

| SNP        | Gene   | Chr | Position   | Major Allele | Minor Allele | MAF <sup>a</sup> | Call Rate <sup>b</sup> | Chromosomal Location <sup>c</sup> | Amino Acid Change <sup>d</sup> | LD Bin ( $r^2 > 0.80$ ) <sup>e</sup>                                                                                                                                                                                                                                          | Analysis Sample <sup>f</sup> |
|------------|--------|-----|------------|--------------|--------------|------------------|------------------------|-----------------------------------|--------------------------------|-------------------------------------------------------------------------------------------------------------------------------------------------------------------------------------------------------------------------------------------------------------------------------|------------------------------|
| rs1879184  | CHRNA2 | 8   | 27,367,620 | C            | T            | 0.135            | 1.000                  | coding                            | T876T<br>(NP_775268)           | rs2565062, rs10100812, rs1583092, rs1864375, rs1879181, rs1879182, rs2043063, rs2099166, rs2163177, rs2251430, rs2280375, rs2292976, rs2292977, rs2322583, rs2322584, rs2472553, rs2565061, rs3735757, rs3735758, rs6981168, rs748281, rs748282, rs891393, rs891397, rs891399 | T                            |
| rs10093964 | CHRNA2 | 8   | 27,367,957 | C            | T            | 0.430            | 0.998                  | intron                            | NA                             | rs1057137, rs1106359, rs2271920, rs7007145, rs751018, rs7831523, rs7846626, rs919494                                                                                                                                                                                          | T                            |
| rs1879182  | CHRNA2 | 8   | 27,371,793 | G            | A            | 0.135            | 1.000                  | coding                            | A960A<br>(NP_775268)           | rs2565062, rs10100812, rs1583092, rs1864375, rs1879181, rs1879184, rs2043063, rs2099166, rs2163177, rs2251430, rs2280375, rs2292976, rs2292977, rs2322583, rs2322584, rs2472553, rs3735757, rs3735758, rs6981168, rs748281, rs748282, rs891393, rs891397, rs891399            | T                            |
| rs748283   | CHRNA2 | 8   | 27,373,112 | C            | A            | 0.487            | 1.000                  | flanking 3'UTR                    | NA                             | rs1560344, rs2292974, rs2292975, rs4733065, rs751019, rs752993                                                                                                                                                                                                                | T                            |
| rs1057137  | CHRNA2 | 8   | 27,373,362 | G            | T            | 0.399            | 0.998                  | flanking 3'UTR                    | NA                             | rs10093964, rs1106359, rs2271920, rs7007145, rs751018, rs7831523, rs7846626, rs919494                                                                                                                                                                                         | T                            |
| rs735421   | CHRNA2 | 8   | 27,375,209 | A            | G            | 0.305            | 0.995                  | intron                            | NA                             | rs1019832, rs2278319, rs2280376, rs891394                                                                                                                                                                                                                                     | T                            |
| rs891394   | CHRNA2 | 8   | 27,375,686 | C            | G            | 0.255            | 1.000                  | intron                            | NA                             | rs1019832, rs2278319, rs2280376, rs735421                                                                                                                                                                                                                                     | T                            |
| rs3735757  | CHRNA2 | 8   | 27,377,514 | C            | G            | 0.136            | 0.990                  | intron                            | NA                             | rs2565062, rs10100812, rs1583092, rs1864375, rs1879181, rs1879182, rs1879184, rs2043063, rs2099166, rs2163177, rs2251430, rs2280375, rs2292976, rs2322581, rs2322583, rs2322584, rs2472553, rs2565061, rs3735758, rs6981168, rs748281, rs748282, rs891393, rs891397, rs891399 | T                            |
| rs2322581  | CHRNA2 | 8   | 27,379,524 | T            | G            | 0.165            | 1.000                  | intron                            | NA                             | rs2565062, rs10100812, rs1583092, rs1864375, rs2043063, rs2099166, rs2163177, rs2251430, rs2280375, rs2322583, rs2322584, rs2472553, rs3735757, rs3735758, rs6981168, rs748282, rs891397, rs891399                                                                            | T                            |
| rs891398   | CHRNA2 | 8   | 27,380,739 | T            | C            | 0.483            | 1.000                  | coding                            | T125A<br>(NP_000733)           | rs2741343                                                                                                                                                                                                                                                                     | T                            |

**Supplemental Table 3: SNP Information**

| SNP       | Gene              | Chr | Position   | Major Allele | Minor Allele | MAF <sup>a</sup> | Call Rate <sup>b</sup> | Chromosomal Location <sup>c</sup> | Amino Acid Change <sup>d</sup> | LD Bin ( $r^2 > 0.80$ ) <sup>e</sup>                                                                                                                                                                                                                                           | Analysis Sample <sup>f</sup> |
|-----------|-------------------|-----|------------|--------------|--------------|------------------|------------------------|-----------------------------------|--------------------------------|--------------------------------------------------------------------------------------------------------------------------------------------------------------------------------------------------------------------------------------------------------------------------------|------------------------------|
| rs891399  | CHRNA2            | 8   | 27,381,340 | G            | A            | 0.131            | 0.998                  | intron                            | NA                             | rs2565062, rs10100812, rs1583092, rs1864375, rs1879181, rs1879182, rs1879184, rs2043063, rs2099166, rs2163177, rs2251430, rs2280375, rs2292976, rs2322581, rs2322583, rs2322584, rs2472553, rs2565061, rs3735757, rs3735758, rs6981168, rs748281, rs748282, rs891393, rs891397 | T                            |
| rs2565062 | CHRNA2            | 8   | 27,381,857 | G            | A            | 0.131            | 1.000                  | intron                            | NA                             | rs10100812, rs1583092, rs1864375, rs1879181, rs1879182, rs1879184, rs2043063, rs2099166, rs2163177, rs2251430, rs2280375, rs2292976, rs2322581, rs2322583, rs2322584, rs2472553, rs2565061, rs3735757, rs3735758, rs6981168, rs748281, rs748282, rs891393, rs891397, rs891399  | T                            |
| rs2472554 | CHRNA2            | 8   | 27,384,271 | C            | G            | 0.305            | 1.000                  | intron                            | NA                             | rs2565065                                                                                                                                                                                                                                                                      | T                            |
| rs2472553 | CHRNA2            | 8   | 27,384,428 | G            | A            | 0.131            | 1.000                  | coding                            | T221 (NP_000733)               | rs2565062, rs10100812, rs1583092, rs1864375, rs1879181, rs1879182, rs1879184, rs2043063, rs2099166, rs2163177, rs2251430, rs2280375, rs2292976, rs2322581, rs2322583, rs2322584, rs2565061, rs3735757, rs3735758, rs6981168, rs748281, rs748282, rs891393, rs891397, rs891399  | T                            |
| rs7815010 | CHRNA2            | 8   | 27,386,013 | C            | T            | 0.251            | 1.000                  | intron                            | NA                             | NA                                                                                                                                                                                                                                                                             | T                            |
| rs2741339 | CHRNA2            | 8   | 27,390,886 | A            | G            | 0.270            | 1.000                  | intron                            | NA                             | rs2565055, rs2565056, rs2741337, rs2741338                                                                                                                                                                                                                                     | T                            |
| rs2565059 | CHRNA2            | 8   | 27,392,895 | G            | A            | 0.191            | 0.998                  | flanking 5'UTR                    | NA                             | NA                                                                                                                                                                                                                                                                             | T                            |
| rs2565055 | CHRNA2            | 8   | 27,393,297 | G            | T            | 0.242            | 1.000                  | flanking 5'UTR                    | NA                             | rs2565056, rs2741335, rs2741337, rs2741338, rs2741339                                                                                                                                                                                                                          | T                            |
| rs2741335 | CHRNA2            | 8   | 27,393,708 | A            | C            | 0.269            | 0.998                  | flanking 5'UTR                    | NA                             | rs2565055, rs2565056, rs2741337, rs2741338                                                                                                                                                                                                                                     | T                            |
| rs6558000 | CHRNA2            | 8   | 27,395,271 | T            | C            | 0.068            | 1.000                  | flanking 5'UTR                    | NA                             | NA                                                                                                                                                                                                                                                                             | T                            |
| rs7017417 | CHRNA2            | 8   | 27,401,222 | A            | G            | 0.095            | 1.000                  | flanking 5'UTR                    | NA                             | rs7003694                                                                                                                                                                                                                                                                      | T                            |
| rs9314348 | CHRNA2            | 8   | 27,401,343 | T            | C            | 0.096            | 1.000                  | flanking 5'UTR                    | NA                             | NA                                                                                                                                                                                                                                                                             | T                            |
| rs7003694 | CHRNA2            | 8   | 27,403,111 | T            | C            | 0.085            | 1.000                  | flanking 5'UTR                    | NA                             | rs7017417                                                                                                                                                                                                                                                                      | T                            |
| rs938682  | CHRNA3            | 15  | 76,683,602 | A            | G            | 0.159            | 1.000                  | intron                            | NA                             | rs11637630, rs12910984, rs3743078, rs4887069, rs569207, rs578776, rs637137, rs6495308, rs6495309, rs667282, rs7177514, rs8042059, rs8042374                                                                                                                                    | T                            |
| rs555018  | CHRNA3;<br>CHRNA5 | 15  | 76,666,297 | A            | G            | 0.417            | 1.000                  | intron                            | NA                             | rs11637635, rs1878399, rs2869546, rs3743077, rs481134, rs495956, rs588765, rs601079, rs621849, rs647041, rs6495306, rs6495307, rs680244, rs692780                                                                                                                              | T                            |

**Supplemental Table 3: SNP Information**

| SNP       | Gene              | Chr | Position   | Major Allele | Minor Allele | MAF <sup>a</sup> | Call Rate <sup>b</sup> | Chromosomal Location <sup>c</sup> | Amino Acid Change <sup>d</sup> | LD Bin ( $r^2 > 0.80$ ) <sup>e</sup>                                                                                                                                                                                                     | Analysis Sample <sup>f</sup> |
|-----------|-------------------|-----|------------|--------------|--------------|------------------|------------------------|-----------------------------------|--------------------------------|------------------------------------------------------------------------------------------------------------------------------------------------------------------------------------------------------------------------------------------|------------------------------|
| rs647041  | CHRNA3;<br>CHRNA5 | 15  | 76,667,536 | C            | T            | 0.418            | 1.000                  | intron                            | NA                             | rs17408276, rs1878399, rs2869546, rs3743073, rs3743074, rs3743077, rs472054, rs481134, rs514743, rs555018, rs588765, rs601079, rs615470, rs621849, rs6495306, rs6495307, rs660652, rs680244                                              | T                            |
| rs514743  | CHRNA3;<br>CHRNA5 | 15  | 76,671,282 | A            | T            | 0.374            | 1.000                  | intron                            | NA                             | rs11637635, rs17408276, rs1878399, rs2869546, rs3743073, rs3743074, rs3743075, rs3743077, rs4275821, rs472054, rs495956, rs588765, rs601079, rs615470, rs621849, rs647041, rs6495306, rs6495307, rs660652, rs680244, rs692780, rs7173512 | T                            |
| rs578776  | CHRNA3;<br>CHRNA5 | 15  | 76,675,455 | G            | A            | 0.207            | 1.000                  | 3'UTR                             | NA                             | rs11637630, rs12910984, rs3743078, rs518425, rs6495308, rs7177514, rs8042059, rs8042374, rs938682                                                                                                                                        | T                            |
| rs6495307 | CHRNA3;<br>CHRNA5 | 15  | 76,677,376 | C            | T            | 0.423            | 1.000                  | intron                            | NA                             | rs17408276, rs1878399, rs2869546, rs3743073, rs3743074, rs3743075, rs3743077, rs472054, rs481134, rs514743, rs555018, rs588765, rs601079, rs615470, rs621849, rs647041, rs6495306, rs660652, rs680244                                    | T                            |
| rs1051730 | CHRNA3;<br>CHRNA5 | 15  | 76,681,394 | G            | A            | 0.406            | 0.986                  | coding                            | Y215Y<br>(NP_000734)           | rs1317286, rs16969968, rs17486278, rs2036527, rs7180002, rs951266                                                                                                                                                                        | T                            |
| rs3743078 | CHRNA3;<br>CHRNA5 | 15  | 76,681,814 | G            | C            | 0.169            | 1.000                  | intron                            | NA                             | rs11637630, rs12910984, rs4887069, rs569207, rs578776, rs637137, rs6495308, rs6495309, rs667282, rs7177514, rs8042059, rs8042374, rs938682                                                                                               | T                            |
| rs3743077 | CHRNA3;<br>CHRNA5 | 15  | 76,681,951 | C            | T            | 0.394            | 0.935                  | intron                            | NA                             | rs17408276, rs1878399, rs2869546, rs3743073, rs3743074, rs472054, rs481134, rs514743, rs555018, rs588765, rs601079, rs615470, rs621849, rs647041, rs6495306, rs6495307, rs660652, rs680244                                               | T                            |
| rs1317286 | CHRNA3;<br>CHRNA5 | 15  | 76,683,184 | A            | G            | 0.419            | 0.998                  | intron                            | NA                             | rs1051730, rs12914385, rs16969968, rs17486278, rs17487223, rs2036527, rs7180002, rs8040868, rs951266                                                                                                                                     | T                            |
| rs4887069 | CHRNA3;<br>CHRN4  | 15  | 76,696,125 | A            | G            | 0.166            | 0.995                  | intron                            | NA                             | rs11637630, rs12910984, rs3743078, rs569207, rs6495308, rs6495309, rs667282, rs7177514, rs8042059, rs8042374, rs938682                                                                                                                   | T                            |
| rs3743075 | CHRNA3;<br>CHRN4  | 15  | 76,696,507 | C            | T            | 0.374            | 1.000                  | coding                            | K97K<br>(NP_000734)            | rs11637635, rs17408276, rs2869546, rs3743073, rs3743074, rs472054, rs495956, rs514743, rs588765, rs615470, rs6495307, rs660652, rs692780                                                                                                 | T                            |
| rs3743073 | CHRNA3;<br>CHRN4  | 15  | 76,696,594 | T            | G            | 0.380            | 1.000                  | intron                            | NA                             | rs11637635, rs17408276, rs2869546, rs3743074, rs3743075, rs3743077, rs4275821, rs472054, rs495956, rs514743, rs588765, rs615470, rs647041, rs6495307, rs660652, rs692780, rs7173512                                                      | T                            |



**Supplemental Table 3: SNP Information**

| SNP       | Gene              | Chr | Position   | Major Allele | Minor Allele | MAF <sup>a</sup> | Call Rate <sup>b</sup> | Chromosomal Location <sup>c</sup> | Amino Acid Change <sup>d</sup> | LD Bin ( $r^2 > 0.80$ ) <sup>e</sup>                                                                                                                                                                   | Analysis Sample <sup>f</sup> |
|-----------|-------------------|-----|------------|--------------|--------------|------------------|------------------------|-----------------------------------|--------------------------------|--------------------------------------------------------------------------------------------------------------------------------------------------------------------------------------------------------|------------------------------|
| rs1878399 | CHRNA3;<br>CHRNB4 | 15  | 76,699,058 | C            | G            | 0.419            | 0.993                  | intron                            | NA                             | rs17408276, rs2869546, rs3743074, rs3743077, rs481134, rs514743, rs555018, rs588765, rs601079, rs615470, rs621849, rs647041, rs6495306, rs6495307, rs660652, rs680244, rs7178270                       | T                            |
| rs6495309 | CHRNA3;<br>CHRNB4 | 15  | 76,702,300 | C            | T            | 0.152            | 1.000                  | flanking 3'UTR                    | NA                             | rs11637630, rs12910984, rs3743078, rs4887069, rs569207, rs637137, rs6495308, rs667282, rs7177514, rs8042059, rs8042374, rs938682                                                                       | T                            |
| rs1948    | CHRNA3;<br>CHRNB4 | 15  | 76,704,454 | G            | A            | 0.351            | 1.000                  | 3'UTR                             | NA                             | NA                                                                                                                                                                                                     | T                            |
| rs7178270 | CHRNA3;<br>CHRNB4 | 15  | 76,708,132 | C            | G            | 0.403            | 1.000                  | intron                            | NA                             | rs1878399                                                                                                                                                                                              | T                            |
| rs4603829 | CHRNA4            | 20  | 61,439,336 | T            | C            | 0.356            | 1.000                  | flanking 3'UTR                    | NA                             | rs9680065                                                                                                                                                                                              | T                            |
| rs4809538 | CHRNA4            | 20  | 61,440,620 | G            | A            | 0.215            | 1.000                  | flanking 3'UTR                    | NA                             | NA                                                                                                                                                                                                     | T                            |
| rs4522666 | CHRNA4            | 20  | 61,444,924 | A            | G            | 0.361            | 1.000                  | flanking 3'UTR                    | NA                             | NA                                                                                                                                                                                                     | T                            |
| rs2236196 | CHRNA4            | 20  | 61,448,000 | A            | G            | 0.275            | 1.000                  | intron                            | NA                             | NA                                                                                                                                                                                                     | T                            |
| rs3787137 | CHRNA4            | 20  | 61,449,544 | A            | G            | 0.406            | 0.981                  | intron                            | NA                             | NA                                                                                                                                                                                                     | G                            |
| rs3787138 | CHRNA4            | 20  | 61,449,668 | A            | G            | 0.128            | 0.928                  | intron                            | NA                             | rs6011776                                                                                                                                                                                              | G                            |
| rs1044396 | CHRNA4            | 20  | 61,451,578 | A            | G            | 0.440            | 0.962                  | coding                            | S543S<br>(NP_000735)           | NA                                                                                                                                                                                                     | G                            |
| rs2273504 | CHRNA4            | 20  | 61,458,505 | G            | A            | 0.146            | 0.935                  | intron                            | NA                             | NA                                                                                                                                                                                                     | T                            |
| rs6010918 | CHRNA4            | 20  | 61,459,945 | G            | A            | 0.046            | 0.942                  | intron                            | NA                             | rs1044394                                                                                                                                                                                              | NA                           |
| rs2273505 | CHRNA4            | 20  | 61,461,322 | C            | T            | 0.074            | 0.938                  | intron                            | NA                             | NA                                                                                                                                                                                                     | G                            |
| rs755203  | CHRNA4            | 20  | 61,464,708 | A            | G            | 0.419            | 0.990                  | flanking 5'UTR                    | NA                             | NA                                                                                                                                                                                                     | G                            |
| rs4809549 | CHRNA4            | 20  | 61,472,553 | G            | C            | 0.460            | 0.998                  | flanking 5'UTR                    | NA                             | NA                                                                                                                                                                                                     | T                            |
| rs4275821 | CHRNA5            | 15  | 76,636,596 | T            | C            | 0.373            | 1.000                  | flanking 3'UTR                    | NA                             | rs11637635, rs17408276, rs3743073, rs3743074, rs472054, rs495956, rs514743, rs615470, rs660652, rs692780, rs7173512                                                                                    | T                            |
| rs2036527 | CHRNA5            | 15  | 76,638,670 | G            | A            | 0.416            | 0.998                  | flanking 5'UTR                    | NA                             | rs1051730, rs1317286, rs16969968, rs17486278, rs17487223, rs7180002, rs951266                                                                                                                          | T                            |
| rs684513  | CHRNA5            | 15  | 76,645,455 | C            | G            | 0.141            | 0.998                  | intron                            | NA                             | rs569207, rs637137, rs667282                                                                                                                                                                           | T                            |
| rs871058  | CHRNA5            | 15  | 76,645,546 | G            | A            | 0.357            | 1.000                  | intron                            | NA                             | NA                                                                                                                                                                                                     | T                            |
| rs667282  | CHRNA5            | 15  | 76,650,527 | T            | C            | 0.163            | 1.000                  | intron                            | NA                             | rs11637630, rs12910984, rs3743078, rs4887069, rs569207, rs637137, rs6495308, rs6495309, rs684513, rs7177514, rs8042059, rs8042374, rs938682                                                            | T                            |
| rs601079  | CHRNA5            | 15  | 76,656,634 | A            | T            | 0.423            | 1.000                  | intron                            | NA                             | rs11637635, rs17408276, rs1878399, rs2869546, rs3743074, rs3743077, rs481134, rs495956, rs514743, rs555018, rs588765, rs615470, rs621849, rs647041, rs6495306, rs6495307, rs660652, rs680244, rs692780 | T                            |

**Supplemental Table 3: SNP Information**

| SNP        | Gene             | Chr | Position   | Major Allele | Minor Allele | MAF <sup>a</sup> | Call Rate <sup>b</sup> | Chromosomal Location <sup>c</sup> | Amino Acid Change <sup>d</sup> | LD Bin ( $r^2 > 0.80$ ) <sup>e</sup>                                                                                                                                                                              | Analysis Sample <sup>f</sup> |
|------------|------------------|-----|------------|--------------|--------------|------------------|------------------------|-----------------------------------|--------------------------------|-------------------------------------------------------------------------------------------------------------------------------------------------------------------------------------------------------------------|------------------------------|
| rs637137   | CHRNA5           | 15  | 76,661,031 | T            | A            | 0.163            | 1.000                  | intron                            | NA                             | rs11637630, rs12910984, rs3743078, rs569207, rs6495308, rs6495309, rs667282, rs684513, rs7177514, rs8042059, rs8042374, rs938682                                                                                  | T                            |
| rs692780   | CHRNA5           | 15  | 76,663,560 | G            | C            | 0.372            | 1.000                  | intron                            | NA                             | rs11637635, rs17408276, rs2869546, rs3743073, rs3743074, rs3743075, rs4275821, rs472054, rs481134, rs495956, rs514743, rs555018, rs588765, rs601079, rs615470, rs621849, rs6495306, rs660652, rs680244, rs7173512 | T                            |
| rs9298628  | CHRNA6           | 8   | 42,725,148 | C            | T            | 0.194            | 0.988                  | flanking 3'UTR                    | NA                             | rs10087172, rs10107450, rs10109040, rs1072003, rs2196128, rs2217732, rs2304297, rs6982753, rs7812298, rs7824155, rs7845663, rs892413, rs9298629                                                                   | T                            |
| rs2304297  | CHRNA6           | 8   | 42,727,356 | G            | C            | 0.226            | 0.998                  | 3'UTR                             | NA                             | rs10087172, rs10107450, rs10109040, rs1072003, rs2217732, rs6982753, rs7812298, rs7824155, rs7845663, rs892413, rs9298628, rs9298629                                                                              | T                            |
| rs2196128  | CHRNA6           | 8   | 42,737,443 | T            | C            | 0.208            | 0.995                  | intron                            | NA                             | rs10087172, rs10109040, rs1072003, rs2217732, rs6982753, rs7812298, rs7824155, rs7845663, rs892413, rs9298628, rs9298629                                                                                          | T                            |
| rs16891620 | CHRNA6           | 8   | 42,744,820 | C            | A            | 0.112            | 1.000                  | flanking 5'UTR                    | NA                             | rs2196129, rs4398905, rs7828365                                                                                                                                                                                   | T                            |
| rs10107450 | CHRNA6           | 8   | 42,749,052 | C            | T            | 0.224            | 0.998                  | flanking 5'UTR                    | NA                             | rs10087172, rs10109040, rs1072003, rs2217732, rs2304297, rs6982753, rs7812298, rs7824155, rs7845663, rs892413, rs9298628, rs9298629                                                                               | T                            |
| rs6474419  | CHRNA6           | 8   | 42,754,456 | A            | G            | 0.034            | 1.000                  | flanking 5'UTR                    | NA                             | rs10109429                                                                                                                                                                                                        | NA                           |
| rs7017612  | CHRNA6;<br>CHRN3 | 8   | 42,718,402 | A            | C            | 0.196            | 0.995                  | flanking 3'UTR                    | NA                             | NA                                                                                                                                                                                                                | T                            |
| rs1514246  | CHRNA7           | 15  | 30,106,782 | C            | A            | 0.253            | 0.986                  | flanking 5'UTR                    | NA                             | rs10851669, rs868437, rs883473, rs965435                                                                                                                                                                          | T                            |
| rs868437   | CHRNA7           | 15  | 30,111,569 | T            | C            | 0.290            | 0.998                  | intron                            | NA                             | rs10851669, rs11071503, rs1514246, rs4779563, rs4779968, rs4779971, rs8037484, rs883473, rs965435                                                                                                                 | T                            |
| rs883473   | CHRNA7           | 15  | 30,112,968 | G            | A            | 0.308            | 0.998                  | intron                            | NA                             | rs10851669, rs1514246, rs868437, rs965435                                                                                                                                                                         | T                            |
| rs4779563  | CHRNA7           | 15  | 30,124,529 | C            | T            | 0.246            | 0.995                  | intron                            | NA                             | rs11071503, rs4779968, rs4779971, rs8037484, rs868437, rs965435                                                                                                                                                   | T                            |
| rs1913456  | CHRNA7           | 15  | 30,133,241 | A            | T            | 0.196            | 0.998                  | intron                            | NA                             | rs11635941, rs11637923, rs1514252, rs1606659, rs3826029, rs885071, rs9672321                                                                                                                                      | T                            |
| rs4779969  | CHRNA7           | 15  | 30,136,223 | C            | A            | 0.052            | 1.000                  | intron                            | NA                             | rs11071511, rs11071512, rs11635209, rs1913459, rs2133965, rs4779970, rs6494182, rs6494185, rs8027034, rs8033518, rs8035663                                                                                        | T                            |
| rs8027814  | CHRNA7           | 15  | 30,137,964 | A            | G            | 0.290            | 0.995                  | intron                            | NA                             | NA                                                                                                                                                                                                                | T                            |
| rs2175886  | CHRNA7           | 15  | 30,143,239 | T            | C            | 0.467            | 0.993                  | intron                            | NA                             | rs7179733                                                                                                                                                                                                         | T                            |

**Supplemental Table 3: SNP Information**

| SNP        | Gene   | Chr | Position   | Major Allele | Minor Allele | MAF <sup>a</sup> | Call Rate <sup>b</sup> | Chromosomal Location <sup>c</sup> | Amino Acid Change <sup>d</sup> | LD Bin ( $r^2 > 0.80$ ) <sup>e</sup>                                                                                       | Analysis Sample <sup>f</sup> |
|------------|--------|-----|------------|--------------|--------------|------------------|------------------------|-----------------------------------|--------------------------------|----------------------------------------------------------------------------------------------------------------------------|------------------------------|
| rs11071530 | CHRNA7 | 15  | 30,147,264 | G            | A            | 0.098            | 1.000                  | intron                            | NA                             | rs11071532, rs12914788, rs12916592, rs1355920, rs1514248, rs1514250, rs1604265, rs8027035, rs982574                        | T                            |
| rs6494211  | CHRNA7 | 15  | 30,164,880 | A            | T            | 0.343            | 0.998                  | intron                            | NA                             | NA                                                                                                                         | T                            |
| rs1514248  | CHRNA7 | 15  | 30,164,975 | T            | C            | 0.134            | 0.866                  | intron                            | NA                             | rs11071530, rs11071532, rs12914788, rs12916592, rs1355920, rs1514250, rs1604265, rs8027035, rs982574                       | T                            |
| rs8033518  | CHRNA7 | 15  | 30,168,901 | G            | A            | 0.050            | 1.000                  | intron                            | NA                             | rs11071511, rs11071512, rs11635209, rs1913459, rs2133965, rs4779969, rs4779970, rs6494182, rs6494185, rs8027034, rs8035663 | T                            |
| rs2133965  | CHRNA7 | 15  | 30,171,846 | G            | A            | 0.068            | 1.000                  | intron                            | NA                             | rs11071511, rs11071512, rs11635209, rs1913459, rs4779969, rs4779970, rs6494182, rs6494185, rs8027034, rs8033518, rs8035663 | T                            |
| rs7175581  | CHRNA7 | 15  | 30,172,759 | G            | A            | 0.430            | 1.000                  | intron                            | NA                             | NA                                                                                                                         | T                            |
| rs4779565  | CHRNA7 | 15  | 30,177,362 | G            | T            | 0.417            | 1.000                  | intron                            | NA                             | rs12438848                                                                                                                 | T                            |
| rs8035668  | CHRNA7 | 15  | 30,178,638 | A            | G            | 0.198            | 1.000                  | intron                            | NA                             | rs6494216, rs8030315, rs8036104, rs8037084, rs9788657, rs9788679                                                           | T                            |
| rs9788657  | CHRNA7 | 15  | 30,182,318 | C            | A            | 0.198            | 0.998                  | intron                            | NA                             | rs6494216, rs8030315, rs8035668, rs8036104, rs8037084, rs9788679                                                           | T                            |
| rs6494223  | CHRNA7 | 15  | 30,183,749 | C            | T            | 0.385            | 1.000                  | intron                            | NA                             | rs8028396, rs8029400                                                                                                       | T                            |
| rs8030315  | CHRNA7 | 15  | 30,184,411 | C            | T            | 0.198            | 0.998                  | intron                            | NA                             | rs6494216, rs8035668, rs8036104, rs8037084, rs9788657, rs9788679                                                           | T                            |
| rs9788679  | CHRNA7 | 15  | 30,186,609 | C            | A            | 0.194            | 0.998                  | intron                            | NA                             | rs6494216, rs8030315, rs8035668, rs8036104, rs8037084, rs9788657                                                           | T                            |
| rs10438342 | CHRNA7 | 15  | 30,189,338 | G            | A            | 0.385            | 0.998                  | intron                            | NA                             | rs12915695                                                                                                                 | T                            |
| rs11852956 | CHRNA7 | 15  | 30,190,622 | T            | C            | 0.231            | 0.998                  | intron                            | NA                             | rs10438287, rs11858834, rs12915265, rs1500946, rs35057608                                                                  | T                            |
| rs1039394  | CHRNA7 | 15  | 30,195,021 | C            | G            | 0.052            | 0.998                  | intron                            | NA                             | NA                                                                                                                         | T                            |
| rs16956223 | CHRNA7 | 15  | 30,198,075 | G            | A            | 0.167            | 1.000                  | intron                            | NA                             | rs12440000, rs13329159, rs13329490, rs1392808, rs2221223                                                                   | T                            |
| rs1392808  | CHRNA7 | 15  | 30,198,807 | C            | A            | 0.166            | 0.998                  | intron                            | NA                             | rs12440000, rs13329159, rs13329490, rs16956223, rs2221223                                                                  | T                            |
| rs904952   | CHRNA7 | 15  | 30,206,037 | T            | C            | 0.478            | 0.998                  | intron                            | NA                             | rs2651418, rs12904458, rs7170028, rs7175359, rs8025554, rs904951                                                           | T                            |
| rs7402321  | CHRNA7 | 15  | 30,207,700 | C            | T            | 0.381            | 0.957                  | intron                            | NA                             | rs1909884                                                                                                                  | T                            |
| rs7175359  | CHRNA7 | 15  | 30,212,239 | C            | T            | 0.476            | 1.000                  | intron                            | NA                             | rs2651418, rs12904458, rs7170028, rs8025554, rs904951, rs904952                                                            | T                            |
| rs2651418  | CHRNA7 | 15  | 30,226,573 | T            | C            | 0.486            | 0.993                  | intron                            | NA                             | rs12904458, rs7170028, rs7175359, rs8025554, rs904951, rs904952                                                            | T                            |
| rs2611605  | CHRNA7 | 15  | 30,228,925 | C            | T            | 0.198            | 0.995                  | intron                            | NA                             | NA                                                                                                                         | T                            |
| rs7178176  | CHRNA7 | 15  | 30,231,105 | C            | T            | 0.245            | 1.000                  | intron                            | NA                             | rs7179008                                                                                                                  | T                            |
| rs2337980  | CHRNA7 | 15  | 30,231,488 | C            | T            | 0.435            | 1.000                  | intron                            | NA                             | NA                                                                                                                         | T                            |
| rs7164518  | CHRNA7 | 15  | 30,249,900 | A            | G            | 0.172            | 0.978                  | flanking 3'UTR                    | NA                             | NA                                                                                                                         | T                            |

**Supplemental Table 3: SNP Information**

| SNP        | Gene   | Chr | Position    | Major Allele | Minor Allele | MAF <sup>a</sup> | Call Rate <sup>b</sup> | Chromosomal Location <sup>c</sup> | Amino Acid Change <sup>d</sup> | LD Bin ( $r^2 > 0.80$ ) <sup>e</sup>                                                                                                                      | Analysis Sample <sup>f</sup> |
|------------|--------|-----|-------------|--------------|--------------|------------------|------------------------|-----------------------------------|--------------------------------|-----------------------------------------------------------------------------------------------------------------------------------------------------------|------------------------------|
| rs7539745  | CHRNA2 | 1   | 152,793,038 | G            | C            | 0.142            | 0.998                  | intron                            | NA                             | rs7543174, rs7553602                                                                                                                                      | T                            |
| rs7543174  | CHRNA2 | 1   | 152,794,296 | T            | C            | 0.159            | 1.000                  | intron                            | NA                             | rs7539745, rs7553602                                                                                                                                      | T                            |
| rs4845652  | CHRNA2 | 1   | 152,804,829 | C            | T            | 0.092            | 1.000                  | flanking 5'UTR                    | NA                             | rs6660775                                                                                                                                                 | T                            |
| rs2072658  | CHRNA2 | 1   | 152,806,849 | G            | A            | 0.019            | 1.000                  | flanking 5'UTR                    | NA                             | NA                                                                                                                                                        | NA                           |
| rs2072659  | CHRNA2 | 1   | 152,815,145 | C            | G            | 0.097            | 0.954                  | 3'UTR                             | NA                             | NA                                                                                                                                                        | G                            |
| rs2072660  | CHRNA2 | 1   | 152,815,345 | C            | T            | 0.225            | 0.995                  | 3'UTR                             | NA                             | rs2072661                                                                                                                                                 | T                            |
| rs2072661  | CHRNA2 | 1   | 152,815,504 | G            | A            | 0.229            | 1.000                  | 3'UTR                             | NA                             | rs2072660                                                                                                                                                 | T                            |
| rs3811450  | CHRNA2 | 1   | 152,817,656 | C            | T            | 0.077            | 0.998                  | flanking 3'UTR                    | NA                             | NA                                                                                                                                                        | T                            |
| rs9616     | CHRNA2 | 1   | 152,822,357 | A            | T            | 0.272            | 1.000                  | 3'UTR                             | NA                             | NA                                                                                                                                                        | T                            |
| rs1127314  | CHRNA2 | 1   | 152,822,890 | A            | G            | 0.299            | 1.000                  | 3'UTR                             | NA                             | rs11264222, rs1127309, rs1127317, rs1127326, rs2131902, rs3766927, rs6656743                                                                              | T                            |
| rs1127313  | CHRNA2 | 1   | 152,823,049 | G            | A            | 0.470            | 1.000                  | 3'UTR                             | NA                             | rs1127311, rs9427094                                                                                                                                      | T                            |
| rs2131902  | CHRNA2 | 1   | 152,826,222 | T            | C            | 0.307            | 1.000                  | intron                            | NA                             | rs11264222, rs1127309, rs1127314, rs1127317, rs1127326, rs3766927, rs6656743                                                                              | T                            |
| rs3766927  | CHRNA2 | 1   | 152,830,765 | C            | T            | 0.299            | 1.000                  | flanking 5'UTR                    | NA                             | rs11264222, rs1127309, rs1127314, rs1127317, rs1127326, rs2131902, rs6656743                                                                              | T                            |
| rs950776   | CHRNA4 | 15  | 76,713,073  | T            | C            | 0.348            | 1.000                  | intron                            | NA                             | NA                                                                                                                                                        | T                            |
| rs12441998 | CHNA4  | 15  | 76,716,427  | A            | G            | 0.165            | 1.000                  | intron                            | NA                             | rs11072768, rs11636605, rs1316971                                                                                                                         | T                            |
| rs1316971  | CHNA4  | 15  | 76,717,565  | G            | A            | 0.167            | 1.000                  | intron                            | NA                             | rs11072768, rs11636605, rs12441998, rs9920506                                                                                                             | T                            |
| rs11633223 | CHNA4  | 15  | 76,722,531  | T            | C            | 0.379            | 1.000                  | flanking 5'UTR                    | NA                             | rs11636753, rs11637890                                                                                                                                    | T                            |
| rs3971872  | CHNA4  | 15  | 76,729,090  | C            | T            | 0.095            | 1.000                  | flanking 5'UTR                    | NA                             | NA                                                                                                                                                        | T                            |
| rs7281533  | CLIC6  | 21  | 34,969,460  | T            | C            | 0.205            | 1.000                  | intron                            | NA                             | rs2154443, rs2236610, rs2409531, rs2834572, rs2834573, rs2834574, rs2834575, rs2834576, rs2834577, rs2834579, rs7281040                                   | T                            |
| rs2409531  | CLIC6  | 21  | 34,975,371  | A            | G            | 0.205            | 1.000                  | intron                            | NA                             | rs2154443, rs2236610, rs2834572, rs2834573, rs2834574, rs2834575, rs2834576, rs2834577, rs2834579, rs7281040, rs7281533                                   | T                            |
| rs7281040  | CLIC6  | 21  | 34,978,271  | C            | T            | 0.204            | 0.998                  | intron                            | NA                             | rs2154443, rs2236610, rs2409531, rs2834572, rs2834573, rs2834574, rs2834575, rs2834576, rs2834577, rs2834579, rs7281533                                   | T                            |
| rs2834578  | CLIC6  | 21  | 34,981,479  | C            | T            | 0.405            | 1.000                  | intron                            | NA                             | rs2070368, rs2834599, rs3819041                                                                                                                           | T                            |
| rs2236610  | CLIC6  | 21  | 34,982,538  | C            | G            | 0.163            | 0.964                  | intron                            | NA                             | rs11702251, rs2070367, rs2154443, rs2409531, rs2834572, rs2834573, rs2834574, rs2834575, rs2834576, rs2834577, rs2834579, rs2834586, rs7281040, rs7281533 | T                            |

**Supplemental Table 3: SNP Information**

| SNP        | Gene  | Chr | Position   | Major Allele | Minor Allele | MAF <sup>a</sup> | Call Rate <sup>b</sup> | Chromosomal Location <sup>c</sup> | Amino Acid Change <sup>d</sup> | LD Bin ( $r^2 > 0.80$ ) <sup>e</sup>                                                  | Analysis Sample <sup>f</sup> |
|------------|-------|-----|------------|--------------|--------------|------------------|------------------------|-----------------------------------|--------------------------------|---------------------------------------------------------------------------------------|------------------------------|
| rs2834586  | CLIC6 | 21  | 34,986,352 | G            | A            | 0.180            | 1.000                  | intron                            | NA                             | rs11702251, rs2070367, rs2236610, rs2834574                                           | T                            |
| rs2834587  | CLIC6 | 21  | 34,986,503 | G            | C            | 0.344            | 1.000                  | intron                            | NA                             | rs1557271, rs2186287, rs2834585, rs2834591, rs2834593, rs6517254, rs7275340, rs733014 | T                            |
| rs2186287  | CLIC6 | 21  | 34,990,935 | C            | A            | 0.338            | 0.986                  | intron                            | NA                             | rs1557271, rs2834585, rs2834587, rs2834591, rs2834593, rs6517254, rs7275340, rs733014 | T                            |
| rs2834590  | CLIC6 | 21  | 34,991,708 | G            | A            | 0.170            | 1.000                  | intron                            | NA                             | rs11911845, rs16992167, rs2834592, rs2834596, rs6517252                               | T                            |
| rs2070367  | CLIC6 | 21  | 35,001,362 | G            | A            | 0.197            | 1.000                  | intron                            | NA                             | rs11702251, rs2236610, rs2834586                                                      | T                            |
| rs6517254  | CLIC6 | 21  | 35,002,160 | C            | T            | 0.380            | 1.000                  | coding                            | F511F (NP_444507)              | rs1557271, rs2186287, rs2834585, rs2834587, rs2834591, rs2834593, rs7275340, rs733014 | T                            |
| rs3819041  | CLIC6 | 21  | 35,003,496 | C            | G            | 0.418            | 1.000                  | intron                            | NA                             | rs2070368, rs2834578, rs2834599                                                       | T                            |
| rs2834600  | CLIC6 | 21  | 35,007,972 | C            | T            | 0.145            | 1.000                  | intron                            | NA                             | rs2834605                                                                             | T                            |
| rs2834603  | CLIC6 | 21  | 35,014,793 | A            | G            | 0.066            | 1.000                  | flanking 3'UTR                    | NA                             | rs2834601                                                                             | T                            |
| rs2834604  | CLIC6 | 21  | 35,014,932 | C            | T            | 0.342            | 1.000                  | flanking 3'UTR                    | NA                             | NA                                                                                    | T                            |
| rs2834605  | CLIC6 | 21  | 35,019,400 | T            | C            | 0.143            | 1.000                  | flanking 3'UTR                    | NA                             | rs2834600                                                                             | T                            |
| rs11088294 | CLIC6 | 21  | 35,020,213 | G            | A            | 0.248            | 0.995                  | flanking 3'UTR                    | NA                             | NA                                                                                    | T                            |
| rs1107470  | CLIC6 | 21  | 35,021,758 | T            | A            | 0.208            | 0.998                  | flanking 3'UTR                    | NA                             | NA                                                                                    | T                            |
| rs6938321  | CNR1  | 6   | 88,892,773 | T            | C            | 0.119            | 1.000                  | flanking 3'UTR                    | NA                             | NA                                                                                    | T                            |
| rs9353524  | CNR1  | 6   | 88,894,335 | C            | G            | 0.210            | 0.998                  | flanking 3'UTR                    | NA                             | rs806368                                                                              | T                            |
| rs10485171 | CNR1  | 6   | 88,900,109 | A            | G            | 0.421            | 0.998                  | flanking 3'UTR                    | NA                             | NA                                                                                    | T                            |
| rs806365   | CNR1  | 6   | 88,902,668 | C            | T            | 0.457            | 0.993                  | flanking 3'UTR                    | NA                             | NA                                                                                    | T                            |
| rs7766029  | CNR1  | 6   | 88,904,154 | C            | T            | 0.482            | 1.000                  | flanking 3'UTR                    | NA                             | NA                                                                                    | T                            |
| rs806366   | CNR1  | 6   | 88,904,308 | C            | T            | 0.480            | 0.998                  | flanking 3'UTR                    | NA                             | NA                                                                                    | T                            |
| rs806368   | CNR1  | 6   | 88,906,819 | T            | C            | 0.214            | 0.993                  | 3'UTR                             | NA                             | rs9353524                                                                             | T                            |
| rs1049353  | CNR1  | 6   | 88,910,354 | C            | T            | 0.258            | 0.998                  | coding                            | T392T (NP_149421)              | rs4707436                                                                             | T                            |
| rs806369   | CNR1  | 6   | 88,912,897 | C            | T            | 0.313            | 1.000                  | flanking 5'UTR                    | NA                             | NA                                                                                    | T                            |
| rs806371   | CNR1  | 6   | 88,913,082 | T            | G            | 0.120            | 1.000                  | flanking 5'UTR                    | NA                             | rs806370, rs806372, rs9353525                                                         | T                            |
| rs806374   | CNR1  | 6   | 88,914,039 | T            | C            | 0.346            | 0.995                  | flanking 5'UTR                    | NA                             | NA                                                                                    | T                            |
| rs806375   | CNR1  | 6   | 88,915,240 | A            | T            | 0.457            | 0.998                  | flanking 5'UTR                    | NA                             | NA                                                                                    | T                            |
| rs806376   | CNR1  | 6   | 88,915,367 | C            | T            | 0.492            | 0.998                  | flanking 5'UTR                    | NA                             | rs806379, rs806377                                                                    | T                            |
| rs806377   | CNR1  | 6   | 88,915,442 | C            | T            | 0.462            | 0.998                  | flanking 5'UTR                    | NA                             | rs806379, rs806376                                                                    | T                            |
| rs806378   | CNR1  | 6   | 88,916,270 | C            | T            | 0.275            | 0.976                  | flanking 5'UTR                    | NA                             | rs6454673, rs6454674, rs806381                                                        | T                            |
| rs2023239  | CNR1  | 6   | 88,917,201 | T            | C            | 0.185            | 1.000                  | flanking 5'UTR                    | NA                             | rs6928499, rs6928813, rs9444584, rs9450898                                            | T                            |
| rs806379   | CNR1  | 6   | 88,917,986 | A            | T            | 0.499            | 0.998                  | flanking 5'UTR                    | NA                             | rs806376, rs806377                                                                    | T                            |

**Supplemental Table 3: SNP Information**

| SNP       | Gene | Chr | Position   | Major Allele | Minor Allele | MAF <sup>a</sup> | Call Rate <sup>b</sup> | Chromosomal Location <sup>c</sup> | Amino Acid Change <sup>d</sup> | LD Bin ( $r^2 > 0.80$ ) <sup>e</sup>                                                                                                                       | Analysis Sample <sup>f</sup> |
|-----------|------|-----|------------|--------------|--------------|------------------|------------------------|-----------------------------------|--------------------------------|------------------------------------------------------------------------------------------------------------------------------------------------------------|------------------------------|
| rs6454672 | CNR1 | 6   | 88,918,289 | T            | C            | 0.139            | 1.000                  | flanking 5'UTR                    | NA                             | rs10485170, rs11966501, rs6454676, rs6454677, rs7752758, rs9444586, rs9444587, rs9444588, rs9450901, rs9450902, rs9450903, rs9450905, rs9450906, rs9450907 | T                            |
| rs9444584 | CNR1 | 6   | 88,919,278 | C            | T            | 0.216            | 1.000                  | flanking 5'UTR                    | NA                             | rs2023239, rs6928499, rs6928813, rs9450898                                                                                                                 | T                            |
| rs806381  | CNR1 | 6   | 88,922,620 | A            | G            | 0.344            | 0.993                  | flanking 5'UTR                    | NA                             | rs6454673, rs6454674, rs806378                                                                                                                             | T                            |
| rs6454673 | CNR1 | 6   | 88,927,768 | G            | A            | 0.308            | 0.998                  | flanking 5'UTR                    | NA                             | rs6454674, rs806378, rs806381                                                                                                                              | T                            |
| rs4485648 | COMT | 22  | 18,299,405 | T            | C            | 0.177            | 1.000                  | intron                            | NA                             | rs11705619, rs4646310, rs6518591                                                                                                                           | T                            |
| rs8140265 | COMT | 22  | 18,301,641 | G            | A            | 0.266            | 0.998                  | flanking 5'UTR                    | NA                             | rs737865, rs2020917, rs5748484, rs737866, rs8185002, rs9605031, rs9606189                                                                                  | T                            |
| rs8137828 | COMT | 22  | 18,303,406 | C            | T            | 0.493            | 0.998                  | flanking 3'UTR                    | NA                             | rs5746846                                                                                                                                                  | T                            |
| rs2871047 | COMT | 22  | 18,306,331 | G            | A            | 0.064            | 0.993                  | flanking 5'UTR                    | NA                             | NA                                                                                                                                                         | T                            |
| rs6518592 | COMT | 22  | 18,307,146 | C            | A            | 0.447            | 1.000                  | flanking 5'UTR                    | NA                             | rs1544325, rs5746847, rs5748483, rs5748485, rs5993883, rs9606186                                                                                           | T                            |
| rs737865  | COMT | 22  | 18,310,121 | A            | G            | 0.269            | 1.000                  | intron                            | NA                             | rs2020917, rs5748484, rs737866, rs8140265, rs8185002, rs9605031, rs9606189                                                                                 | T                            |
| rs1544325 | COMT | 22  | 18,311,668 | G            | A            | 0.453            | 0.998                  | intron                            | NA                             | rs5746847, rs5748483, rs5748485, rs5993883, rs6518592, rs9606186                                                                                           | T                            |
| rs174675  | COMT | 22  | 18,314,051 | C            | T            | 0.277            | 1.000                  | intron                            | NA                             | rs174674, rs933271                                                                                                                                         | T                            |
| rs5993883 | COMT | 22  | 18,317,638 | T            | G            | 0.487            | 1.000                  | intron                            | NA                             | rs1544325, rs5746847, rs5748483, rs5748485, rs6518592                                                                                                      | T                            |
| rs5992500 | COMT | 22  | 18,321,947 | C            | T            | 0.004            | 1.000                  | intron                            | NA                             | NA                                                                                                                                                         | NA                           |
| rs7290221 | COMT | 22  | 18,322,680 | C            | G            | 0.476            | 0.998                  | intron                            | NA                             | NA                                                                                                                                                         | T                            |
| rs740603  | COMT | 22  | 18,325,177 | A            | G            | 0.486            | 1.000                  | intron                            | NA                             | NA                                                                                                                                                         | T                            |
| rs4646312 | COMT | 22  | 18,328,337 | T            | C            | 0.373            | 1.000                  | intron                            | NA                             | rs2239393, rs4818, rs740601                                                                                                                                | T                            |
| rs165656  | COMT | 22  | 18,328,863 | C            | G            | 0.466            | 0.988                  | intron                            | NA                             | NA                                                                                                                                                         | T                            |
| rs4633    | COMT | 22  | 18,330,235 | T            | C            | 0.471            | 1.000                  | coding                            | H12H (NP_009294)               | rs4680                                                                                                                                                     | T                            |
| rs2239393 | COMT | 22  | 18,330,428 | A            | G            | 0.381            | 1.000                  | flanking 3'UTR                    | NA                             | rs4646312, rs4818, rs740601                                                                                                                                | T                            |
| rs4646316 | COMT | 22  | 18,332,132 | C            | T            | 0.208            | 0.995                  | intron                            | NA                             | NA                                                                                                                                                         | T                            |
| rs165774  | COMT | 22  | 18,332,561 | G            | A            | 0.329            | 0.988                  | intron                            | NA                             | NA                                                                                                                                                         | T                            |
| rs174696  | COMT | 22  | 18,333,176 | T            | C            | 0.227            | 0.995                  | intron                            | NA                             | NA                                                                                                                                                         | T                            |
| rs174697  | COMT | 22  | 18,333,832 | G            | A            | 0.053            | 0.998                  | intron                            | NA                             | NA                                                                                                                                                         | T                            |
| rs174699  | COMT | 22  | 18,334,458 | T            | C            | 0.050            | 1.000                  | intron                            | NA                             | NA                                                                                                                                                         | T                            |
| rs165599  | COMT | 22  | 18,336,781 | A            | G            | 0.319            | 1.000                  | flanking 3'UTR                    | NA                             | NA                                                                                                                                                         | T                            |
| rs165824  | COMT | 22  | 18,339,366 | A            | G            | 0.083            | 0.952                  | intron                            | NA                             | NA                                                                                                                                                         | T                            |
| rs165815  | COMT | 22  | 18,339,473 | T            | C            | 0.149            | 1.000                  | coding                            | Q906R (NP_001661)              | rs887199                                                                                                                                                   | T                            |
| rs5993891 | COMT | 22  | 18,339,746 | C            | T            | 0.057            | 0.990                  | intron                            | NA                             | rs2239395, rs2240713                                                                                                                                       | T                            |

**Supplemental Table 3: SNP Information**

| SNP        | Gene  | Chr | Position    | Major Allele | Minor Allele | MAF <sup>a</sup> | Call Rate <sup>b</sup> | Chromosomal Location <sup>c</sup> | Amino Acid Change <sup>d</sup> | LD Bin ( $r^2 > 0.80$ ) <sup>e</sup>                                                                                                                                                                                   | Analysis Sample <sup>f</sup> |
|------------|-------|-----|-------------|--------------|--------------|------------------|------------------------|-----------------------------------|--------------------------------|------------------------------------------------------------------------------------------------------------------------------------------------------------------------------------------------------------------------|------------------------------|
| rs2240713  | COMT  | 22  | 18,341,101  | C            | T            | 0.054            | 0.993                  | intron                            | NA                             | rs2239394, rs2239395, rs2240714, rs5993891, rs758373                                                                                                                                                                   | T                            |
| rs887199   | COMT  | 22  | 18,341,955  | G            | A            | 0.146            | 1.000                  | intron                            | NA                             | rs1110478, rs165815, rs887200                                                                                                                                                                                          | T                            |
| rs887200   | COMT  | 22  | 18,343,666  | T            | C            | 0.130            | 0.988                  | intron                            | NA                             | rs887199, rs1110478, rs758373                                                                                                                                                                                          | G                            |
| rs2709371  | CREB1 | 2   | 208,092,932 | A            | G            | 0.187            | 1.000                  | flanking 5'UTR                    | NA                             | rs1045780, rs1806584, rs2464978, rs2551639, rs2551919, rs2551920, rs2551921, rs2551923, rs2551928, rs2551931, rs2709356, rs2709373, rs2709387, rs2709392, rs2709396, rs2709399, rs2709402, rs6785, rs889895            | T                            |
| rs2253206  | CREB1 | 2   | 208,100,223 | G            | A            | 0.480            | 0.995                  | flanking 5'UTR                    | NA                             | NA                                                                                                                                                                                                                     | T                            |
| rs2551640  | CREB1 | 2   | 208,116,138 | A            | G            | 0.356            | 0.998                  | intron                            | NA                             | rs11904814, rs2254137, rs7369949                                                                                                                                                                                       | T                            |
| rs2551642  | CREB1 | 2   | 208,121,742 | C            | A            | 0.181            | 1.000                  | intron                            | NA                             | NA                                                                                                                                                                                                                     | T                            |
| rs2709402  | CREB1 | 2   | 208,129,222 | C            | A            | 0.180            | 0.998                  | intron                            | NA                             | rs1045780, rs1806584, rs2464978, rs2551639, rs2551919, rs2551920, rs2551921, rs2551923, rs2551928, rs2551931, rs2709356, rs2709371, rs2709373, rs2709387, rs2709392, rs2709396, rs2709399, rs2709402, rs6785, rs889895 | T                            |
| rs10932201 | CREB1 | 2   | 208,134,502 | G            | A            | 0.460            | 1.000                  | flanking 3'UTR                    | NA                             | rs6740584                                                                                                                                                                                                              | T                            |
| rs11904814 | CREB1 | 2   | 208,135,043 | T            | G            | 0.310            | 0.998                  | flanking 3'UTR                    | NA                             | rs2254137, rs2551640, rs7369949, rs7569963                                                                                                                                                                             | T                            |
| rs16839883 | CREB1 | 2   | 208,137,587 | A            | G            | 0.018            | 0.998                  | flanking 5'UTR                    | NA                             | NA                                                                                                                                                                                                                     | NA                           |
| rs2551921  | CREB1 | 2   | 208,143,800 | T            | C            | 0.181            | 1.000                  | intron                            | NA                             | rs1045780, rs1806584, rs2464978, rs2551639, rs2551919, rs2551920, rs2551923, rs2551928, rs2551931, rs2709356, rs2709371, rs2709373, rs2709387, rs2709392, rs2709396, rs2709399, rs2709402, rs6785, rs889895            | T                            |
| rs2551923  | CREB1 | 2   | 208,150,021 | C            | T            | 0.180            | 0.995                  | intron                            | NA                             | rs1045780, rs1806584, rs2464978, rs2551639, rs2551919, rs2551920, rs2551921, rs2551928, rs2551931, rs2709356, rs2709371, rs2709373, rs2709387, rs2709392, rs2709396, rs2709399, rs2709402, rs6785, rs889895            | T                            |
| rs7369949  | CREB1 | 2   | 208,159,033 | T            | C            | 0.359            | 1.000                  | intron                            | NA                             | rs11904814, rs2254137, rs2551640                                                                                                                                                                                       | T                            |
| rs13397461 | CREB1 | 2   | 208,166,082 | A            | NA           | 0.000            | 1.000                  | intron                            | NA                             | NA                                                                                                                                                                                                                     | NA                           |
| rs2551928  | CREB1 | 2   | 208,174,023 | G            | A            | 0.187            | 1.000                  | flanking 3'UTR                    | NA                             | rs1045780, rs1806584, rs2464978, rs2551639, rs2551919, rs2551920, rs2551921, rs2551923, rs2551931, rs2709356, rs2709371, rs2709373, rs2709387, rs2709392, rs2709396, rs2709399, rs2709402, rs6785, rs889895            | T                            |

**Supplemental Table 3: SNP Information**

| SNP        | Gene   | Chr | Position    | Major Allele | Minor Allele | MAF <sup>a</sup> | Call Rate <sup>b</sup> | Chromosomal Location <sup>c</sup> | Amino Acid Change <sup>d</sup> | LD Bin ( $r^2 > 0.80$ ) <sup>e</sup>                                                                                                                                                                        | Analysis Sample <sup>f</sup> |
|------------|--------|-----|-------------|--------------|--------------|------------------|------------------------|-----------------------------------|--------------------------------|-------------------------------------------------------------------------------------------------------------------------------------------------------------------------------------------------------------|------------------------------|
| rs1806584  | CREB1  | 2   | 208,174,515 | A            | G            | 0.181            | 1.000                  | flanking 3'UTR                    | NA                             | rs1045780, rs2464978, rs2551639, rs2551919, rs2551920, rs2551921, rs2551923, rs2551928, rs2551931, rs2709356, rs2709371, rs2709373, rs2709387, rs2709392, rs2709396, rs2709399, rs2709402, rs6785, rs889895 | T                            |
| rs1045780  | CREB1  | 2   | 208,175,395 | G            | A            | 0.181            | 1.000                  | flanking 3'UTR                    | NA                             | rs1806584, rs2464978, rs2551639, rs2551919, rs2551920, rs2551921, rs2551923, rs2551928, rs2551931, rs2709356, rs2709371, rs2709373, rs2709387, rs2709392, rs2709396, rs2709399, rs2709402, rs6785, rs889895 | T                            |
| rs2551931  | CREB1  | 2   | 208,179,725 | G            | A            | 0.183            | 0.988                  | flanking 3'UTR                    | NA                             | rs1045780, rs1806584, rs2464978, rs2551639, rs2551919, rs2551920, rs2551921, rs2551923, rs2551928, rs2709356, rs2709371, rs2709373, rs2709387, rs2709392, rs2709396, rs2709399, rs2709402, rs6785, rs889895 | T                            |
| rs7569963  | CREB1  | 2   | 208,181,429 | G            | A            | 0.288            | 0.998                  | flanking 3'UTR                    | NA                             | rs11904814                                                                                                                                                                                                  | T                            |
| rs2191416  | CREBBP | 16  | 3,710,730   | G            | A            | 0.244            | 0.998                  | flanking 5'UTR                    | NA                             | rs9392                                                                                                                                                                                                      | T                            |
| rs9392     | CREBBP | 16  | 3,715,170   | G            | A            | 0.219            | 1.000                  | flanking 3'UTR                    | NA                             | rs2191416                                                                                                                                                                                                   | T                            |
| rs130008   | CREBBP | 16  | 3,721,953   | C            | G            | 0.025            | 1.000                  | intron                            | NA                             | NA                                                                                                                                                                                                          | NA                           |
| rs130016   | CREBBP | 16  | 3,730,308   | T            | C            | 0.499            | 1.000                  | intron                            | NA                             | NA                                                                                                                                                                                                          | T                            |
| rs129968   | CREBBP | 16  | 3,731,262   | G            | A            | 0.352            | 0.978                  | intron                            | NA                             | NA                                                                                                                                                                                                          | T                            |
| rs3025684  | CREBBP | 16  | 3,735,364   | G            | A            | 0.025            | 0.962                  | intron                            | NA                             | NA                                                                                                                                                                                                          | NA                           |
| rs129963   | CREBBP | 16  | 3,736,148   | C            | T            | 0.436            | 1.000                  | intron                            | NA                             | NA                                                                                                                                                                                                          | T                            |
| rs11864123 | CREBBP | 16  | 3,744,325   | T            | A            | 0.019            | 1.000                  | intron                            | NA                             | NA                                                                                                                                                                                                          | NA                           |
| rs886528   | CREBBP | 16  | 3,751,557   | A            | G            | 0.470            | 0.998                  | intron                            | NA                             | NA                                                                                                                                                                                                          | T                            |
| rs13380693 | CREBBP | 16  | 3,757,049   | T            | C            | 0.023            | 1.000                  | intron                            | NA                             | NA                                                                                                                                                                                                          | NA                           |
| rs12051375 | CREBBP | 16  | 3,767,554   | G            | A            | 0.006            | 1.000                  | intron                            | NA                             | NA                                                                                                                                                                                                          | NA                           |
| rs130002   | CREBBP | 16  | 3,767,932   | T            | C            | 0.006            | 1.000                  | intron                            | NA                             | NA                                                                                                                                                                                                          | NA                           |
| rs8052927  | CREBBP | 16  | 3,768,586   | G            | T            | 0.020            | 0.998                  | intron                            | NA                             | NA                                                                                                                                                                                                          | NA                           |
| rs130021   | CREBBP | 16  | 3,772,472   | A            | G            | 0.353            | 1.000                  | intron                            | NA                             | NA                                                                                                                                                                                                          | T                            |
| rs130025   | CREBBP | 16  | 3,772,960   | C            | A            | 0.016            | 1.000                  | intron                            | NA                             | NA                                                                                                                                                                                                          | NA                           |
| rs8046065  | CREBBP | 16  | 3,778,299   | C            | T            | 0.114            | 1.000                  | intron                            | NA                             | NA                                                                                                                                                                                                          | T                            |
| rs3789033  | CREBBP | 16  | 3,779,536   | T            | C            | 0.236            | 1.000                  | intron                            | NA                             | rs17199030, rs2239316                                                                                                                                                                                       | T                            |
| rs8047652  | CREBBP | 16  | 3,789,559   | G            | T            | 0.023            | 1.000                  | intron                            | NA                             | NA                                                                                                                                                                                                          | NA                           |
| rs13334803 | CREBBP | 16  | 3,798,348   | T            | A            | 0.017            | 0.995                  | intron                            | NA                             | NA                                                                                                                                                                                                          | NA                           |
| rs130046   | CREBBP | 16  | 3,803,947   | A            | C            | 0.016            | 1.000                  | intron                            | NA                             | NA                                                                                                                                                                                                          | NA                           |
| rs11644593 | CREBBP | 16  | 3,811,287   | G            | A            | 0.098            | 1.000                  | intron                            | NA                             | rs11076786, rs130005, rs130052, rs2239317, rs2239318                                                                                                                                                        | T                            |
| rs1296720  | CREBBP | 16  | 3,813,643   | A            | C            | 0.184            | 0.998                  | intron                            | NA                             | NA                                                                                                                                                                                                          | T                            |



**Supplemental Table 3: SNP Information**

| SNP        | Gene   | Chr | Position   | Major Allele | Minor Allele | MAF <sup>a</sup> | Call Rate <sup>b</sup> | Chromosomal Location <sup>c</sup> | Amino Acid Change <sup>d</sup> | LD Bin ( $r^2 > 0.80$ ) <sup>e</sup>                                                                                                                                                                                                                                                                        | Analysis Sample <sup>f</sup> |
|------------|--------|-----|------------|--------------|--------------|------------------|------------------------|-----------------------------------|--------------------------------|-------------------------------------------------------------------------------------------------------------------------------------------------------------------------------------------------------------------------------------------------------------------------------------------------------------|------------------------------|
| rs4567717  | CREBBP | 16  | 3,838,834  | A            | C            | 0.013            | 1.000                  | intron                            | NA                             | NA                                                                                                                                                                                                                                                                                                          | NA                           |
| rs2540038  | CREBBP | 16  | 3,848,845  | G            | A            | 0.012            | 0.998                  | intron                            | NA                             | NA                                                                                                                                                                                                                                                                                                          | NA                           |
| rs2239316  | CREBBP | 16  | 3,853,996  | A            | G            | 0.267            | 1.000                  | intron                            | NA                             | rs17199030, rs3789033                                                                                                                                                                                                                                                                                       | T                            |
| rs7202140  | CREBBP | 16  | 3,864,655  | C            | G            | 0.022            | 1.000                  | intron                            | NA                             | NA                                                                                                                                                                                                                                                                                                          | NA                           |
| rs2526687  | CREBBP | 16  | 3,872,726  | G            | A            | 0.012            | 1.000                  | flanking 5'UTR                    | NA                             | NA                                                                                                                                                                                                                                                                                                          | NA                           |
| rs12953076 | CRHR1  | 17  | 41,209,781 | C            | T            | 0.174            | 1.000                  | flanking 5'UTR                    | NA                             | rs4076452                                                                                                                                                                                                                                                                                                   | T                            |
| rs4074461  | CRHR1  | 17  | 41,210,922 | T            | G            | 0.458            | 0.993                  | flanking 5'UTR                    | NA                             | rs110402, rs171440, rs242924, rs7209436, rs81189                                                                                                                                                                                                                                                            | T                            |
| rs12944712 | CRHR1  | 17  | 41,226,918 | G            | A            | 0.415            | 1.000                  | intron                            | NA                             | rs110402, rs171440, rs242924, rs7209436, rs81189                                                                                                                                                                                                                                                            | T                            |
| rs4792887  | CRHR1  | 17  | 41,232,791 | C            | T            | 0.120            | 1.000                  | intron                            | NA                             | rs12936181, rs16940646, rs171441, rs4792886, rs4792888, rs9892359                                                                                                                                                                                                                                           | T                            |
| rs16940646 | CRHR1  | 17  | 41,235,682 | A            | C            | 0.119            | 0.998                  | intron                            | NA                             | rs242939, rs12936181, rs4792886, rs4792887, rs4792888                                                                                                                                                                                                                                                       | T                            |
| rs242924   | CRHR1  | 17  | 41,241,147 | G            | T            | 0.445            | 1.000                  | intron                            | NA                             | rs110402, rs12944712, rs171440, rs4074461, rs7209436, rs81189                                                                                                                                                                                                                                               | T                            |
| rs242942   | CRHR1  | 17  | 41,247,413 | C            | T            | 0.129            | 1.000                  | intron                            | NA                             | NA                                                                                                                                                                                                                                                                                                          | T                            |
| rs81189    | CRHR1  | 17  | 41,250,579 | G            | C            | 0.481            | 1.000                  | intron                            | NA                             | rs110402, rs12944712, rs171440, rs242924, rs4074461, rs7209436                                                                                                                                                                                                                                              | T                            |
| rs242939   | CRHR1  | 17  | 41,251,360 | T            | C            | 0.086            | 1.000                  | intron                            | NA                             | rs16940646, rs171441, rs4792888                                                                                                                                                                                                                                                                             | T                            |
| rs1876829  | CRHR1  | 17  | 41,267,224 | T            | C            | 0.209            | 0.899                  | intron                            | NA                             | rs10445364, rs1396862, rs16940665, rs16940674, rs17689471, rs17689653, rs17689824, rs17689882, rs17689918, rs17690314, rs17690326, rs17762769, rs17762954, rs17763086, rs17763533, rs17763596, rs17763634, rs1876831, rs1912151, rs4074462, rs4277389, rs4566211, rs4640231, rs8072451, rs878886, rs878887  | T                            |
| rs1876828  | CRHR1  | 17  | 41,267,306 | C            | T            | 0.201            | 0.950                  | intron                            | NA                             | NA                                                                                                                                                                                                                                                                                                          | G                            |
| rs878887   | CRHR1  | 17  | 41,268,363 | C            | T            | 0.200            | 0.990                  | 3'UTR                             | NA                             | rs10445364, rs1396862, rs16940665, rs16940674, rs17689471, rs17689653, rs17689824, rs17689882, rs17689918, rs17690314, rs17690326, rs17762769, rs17762954, rs17763086, rs17763533, rs17763596, rs17763634, rs1876829, rs1876831, rs1912151, rs4074462, rs4277389, rs4566211, rs4640231, rs8072451, rs878886 | T                            |

**Supplemental Table 3: SNP Information**

| SNP        | Gene  | Chr | Position    | Major Allele | Minor Allele | MAF <sup>a</sup> | Call Rate <sup>b</sup> | Chromosomal Location <sup>c</sup> | Amino Acid Change <sup>d</sup> | LD Bin ( $r^2 > 0.80$ ) <sup>e</sup>                                                                                                                                                                                                                                                                      | Analysis Sample <sup>f</sup> |
|------------|-------|-----|-------------|--------------|--------------|------------------|------------------------|-----------------------------------|--------------------------------|-----------------------------------------------------------------------------------------------------------------------------------------------------------------------------------------------------------------------------------------------------------------------------------------------------------|------------------------------|
| rs10445364 | CRHR1 | 17  | 41,272,136  | G            | A            | 0.198            | 0.995                  | flanking 3'UTR                    | NA                             | rs1396862, rs16940665, rs16940674, rs17689471, rs17689653, rs17689824, rs17689882, rs17689918, rs17690314, rs17690326, rs17762769, rs17762954, rs17763086, rs17763533, rs17763596, rs17763634, rs1876829, rs1876831, rs1912151, rs4074462, rs4277389, rs4566211, rs4640231, rs8072451, rs878886, rs878887 | T                            |
| rs4792825  | CRHR1 | 17  | 41,275,461  | A            | G            | 0.126            | 1.000                  | flanking 5'UTR                    | NA                             | rs242936                                                                                                                                                                                                                                                                                                  | T                            |
| rs17690326 | CRHR1 | 17  | 41,276,754  | T            | C            | 0.198            | 0.998                  | flanking 5'UTR                    | NA                             | rs10445364, rs1396862, rs16940665, rs16940674, rs17689471, rs17689653, rs17689824, rs17689882, rs17689918, rs17690314, rs17762769, rs17762954, rs17763086, rs17763533, rs17763596, rs17763634, rs1876829, rs1876831, rs1912151, rs4074462, rs4277389, rs4566211, rs4640231, rs8072451, rs878886, rs878887 | T                            |
| rs242944   | CRHR1 | 17  | 41,278,960  | A            | G            | 0.430            | 1.000                  | coding                            | R303H<br>(NP_787078)           | rs173365, rs17689966                                                                                                                                                                                                                                                                                      | T                            |
| rs2519765  | DBH   | 9   | 135,484,246 | C            | T            | 0.316            | 0.986                  | flanking 5'UTR                    | NA                             | rs2519147, rs2519149, rs2519764                                                                                                                                                                                                                                                                           | T                            |
| rs2519148  | DBH   | 9   | 135,484,387 | G            | A            | 0.495            | 0.988                  | flanking 5'UTR                    | NA                             | NA                                                                                                                                                                                                                                                                                                        | T                            |
| rs2519147  | DBH   | 9   | 135,485,139 | A            | G            | 0.353            | 0.998                  | flanking 5'UTR                    | NA                             | rs2519149, rs2519764, rs2519765                                                                                                                                                                                                                                                                           | T                            |
| rs1076153  | DBH   | 9   | 135,487,964 | G            | T            | 0.197            | 0.998                  | flanking 5'UTR                    | NA                             | NA                                                                                                                                                                                                                                                                                                        | T                            |
| rs1076150  | DBH   | 9   | 135,488,582 | C            | T            | 0.465            | 0.966                  | flanking 5'UTR                    | NA                             | NA                                                                                                                                                                                                                                                                                                        | G                            |
| rs1611115  | DBH   | 9   | 135,490,336 | C            | T            | 0.189            | 0.998                  | flanking 5'UTR                    | NA                             | NA                                                                                                                                                                                                                                                                                                        | T                            |
| rs2797849  | DBH   | 9   | 135,491,762 | G            | C            | 0.376            | 1.000                  | intron                            | NA                             | rs2519155, rs2797851, rs2797852                                                                                                                                                                                                                                                                           | T                            |
| rs2519143  | DBH   | 9   | 135,492,149 | G            | A            | 0.175            | 1.000                  | intron                            | NA                             | NA                                                                                                                                                                                                                                                                                                        | T                            |
| rs3025388  | DBH   | 9   | 135,493,077 | A            | G            | 0.162            | 0.954                  | intron                            | NA                             | NA                                                                                                                                                                                                                                                                                                        | G                            |
| rs2007153  | DBH   | 9   | 135,493,640 | C            | T            | 0.341            | 1.000                  | intron                            | NA                             | NA                                                                                                                                                                                                                                                                                                        | T                            |
| rs2519155  | DBH   | 9   | 135,494,419 | T            | C            | 0.375            | 0.998                  | intron                            | NA                             | rs2797849, rs2797851, rs2797852                                                                                                                                                                                                                                                                           | T                            |
| rs1611118  | DBH   | 9   | 135,494,744 | C            | T            | 0.052            | 1.000                  | intron                            | NA                             | rs1611119                                                                                                                                                                                                                                                                                                 | T                            |
| rs1108580  | DBH   | 9   | 135,494,935 | G            | A            | 0.445            | 0.945                  | intron                            | E148E<br>(NP_000778)           | rs1541333, rs1548364, rs1611122, rs1611125, rs2873804                                                                                                                                                                                                                                                     | G                            |
| rs1108581  | DBH   | 9   | 135,495,062 | A            | G            | 0.183            | 1.000                  | intron                            | NA                             | NA                                                                                                                                                                                                                                                                                                        | T                            |
| rs5320     | DBH   | 9   | 135,497,294 | G            | A            | 0.067            | 0.916                  | coding                            | A197T<br>(NP_000778)           | NA                                                                                                                                                                                                                                                                                                        | T                            |
| rs5324     | DBH   | 9   | 135,498,479 | G            | A            | 0.001            | 0.998                  | coding                            | D276N<br>(NP_000778)           | NA                                                                                                                                                                                                                                                                                                        | NA                           |
| rs3025399  | DBH   | 9   | 135,498,795 | A            | C            | 0.041            | 1.000                  | intron                            | NA                             | NA                                                                                                                                                                                                                                                                                                        | NA                           |
| rs1611123  | DBH   | 9   | 135,498,904 | C            | T            | 0.498            | 1.000                  | intron                            | NA                             | rs2797855                                                                                                                                                                                                                                                                                                 | T                            |
| rs2797855  | DBH   | 9   | 135,500,715 | G            | C            | 0.434            | 0.998                  | intron                            | NA                             | rs1611123                                                                                                                                                                                                                                                                                                 | T                            |

**Supplemental Table 3: SNP Information**

| SNP        | Gene | Chr | Position    | Major Allele | Minor Allele | MAF <sup>a</sup> | Call Rate <sup>b</sup> | Chromosomal Location <sup>c</sup> | Amino Acid Change <sup>d</sup> | LD Bin ( $r^2 > 0.80$ ) <sup>e</sup>                                                                                                                                                                                                                                                        | Analysis Sample <sup>f</sup> |
|------------|------|-----|-------------|--------------|--------------|------------------|------------------------|-----------------------------------|--------------------------------|---------------------------------------------------------------------------------------------------------------------------------------------------------------------------------------------------------------------------------------------------------------------------------------------|------------------------------|
| rs1541333  | DBH  | 9   | 135,501,206 | G            | C            | 0.441            | 1.000                  | intron                            | NA                             | rs1108580, rs1548364, rs1611122, rs1611125, rs2873804                                                                                                                                                                                                                                       | T                            |
| rs1541332  | DBH  | 9   | 135,501,337 | G            | A            | 0.450            | 1.000                  | intron                            | NA                             | NA                                                                                                                                                                                                                                                                                          | T                            |
| rs2519154  | DBH  | 9   | 135,502,096 | T            | C            | 0.417            | 0.998                  | intron                            | NA                             | NA                                                                                                                                                                                                                                                                                          | T                            |
| rs2797853  | DBH  | 9   | 135,502,336 | C            | T            | 0.356            | 1.000                  | intron                            | NA                             | NA                                                                                                                                                                                                                                                                                          | T                            |
| rs6479643  | DBH  | 9   | 135,504,489 | G            | C            | 0.378            | 1.000                  | intron                            | NA                             | NA                                                                                                                                                                                                                                                                                          | T                            |
| rs77905    | DBH  | 9   | 135,507,918 | A            | G            | 0.476            | 0.995                  | coding                            | T456T<br>(NP_000778)           | NA                                                                                                                                                                                                                                                                                          | T                            |
| rs2097628  | DBH  | 9   | 135,509,523 | T            | C            | 0.026            | 1.000                  | intron                            | NA                             | rs2097629                                                                                                                                                                                                                                                                                   | NA                           |
| rs2073833  | DBH  | 9   | 135,510,103 | G            | C            | 0.421            | 0.976                  | intron                            | NA                             | rs732833                                                                                                                                                                                                                                                                                    | G                            |
| rs6271     | DBH  | 9   | 135,512,095 | C            | T            | 0.077            | 0.990                  | coding                            | R535C<br>(NP_000778)           | NA                                                                                                                                                                                                                                                                                          | T                            |
| rs10993948 | DBH  | 9   | 135,512,723 | G            | C            | 0.020            | 1.000                  | intron                            | NA                             | NA                                                                                                                                                                                                                                                                                          | NA                           |
| rs10993949 | DBH  | 9   | 135,512,806 | A            | G            | 0.020            | 1.000                  | intron                            | NA                             | NA                                                                                                                                                                                                                                                                                          | NA                           |
| rs3025425  | DBH  | 9   | 135,512,987 | C            | T            | 0.020            | 0.998                  | intron                            | NA                             | NA                                                                                                                                                                                                                                                                                          | NA                           |
| rs129883   | DBH  | 9   | 135,514,632 | C            | G            | 0.363            | 1.000                  | flanking 3'UTR                    | NA                             | NA                                                                                                                                                                                                                                                                                          | T                            |
| rs129915   | DBH  | 9   | 135,514,739 | A            | G            | 0.289            | 0.914                  | flanking 3'UTR                    | NA                             | rs129888, rs129928, rs1611131, rs2073835, rs2073836, rs2073837                                                                                                                                                                                                                              | T                            |
| rs129884   | DBH  | 9   | 135,514,907 | G            | A            | 0.163            | 1.000                  | flanking 3'UTR                    | NA                             | rs129882, rs129886                                                                                                                                                                                                                                                                          | T                            |
| rs129886   | DBH  | 9   | 135,518,542 | C            | T            | 0.173            | 0.998                  | 3'UTR                             | NA                             | rs129882, rs129884                                                                                                                                                                                                                                                                          | T                            |
| rs2073835  | DBH  | 9   | 135,522,004 | G            | A            | 0.303            | 0.976                  | intron                            | NA                             | rs129888, rs129915, rs129928, rs1611131, rs2073836, rs2073837                                                                                                                                                                                                                               | G                            |
| rs3735275  | DDC  | 7   | 50,484,765  | A            | G            | 0.167            | 1.000                  | 5'UTR                             | NA                             | rs2060762                                                                                                                                                                                                                                                                                   | T                            |
| rs4947510  | DDC  | 7   | 50,492,914  | G            | A            | 0.293            | 1.000                  | flanking 3'UTR                    | NA                             | NA                                                                                                                                                                                                                                                                                          | T                            |
| rs4947511  | DDC  | 7   | 50,493,367  | G            | A            | 0.005            | 1.000                  | flanking 3'UTR                    | NA                             | NA                                                                                                                                                                                                                                                                                          | NA                           |
| rs11575553 | DDC  | 7   | 50,493,713  | G            | A            | 0.107            | 1.000                  | 3'UTR                             | NA                             | rs2242041                                                                                                                                                                                                                                                                                   | T                            |
| rs4947535  | DDC  | 7   | 50,499,175  | A            | T            | 0.283            | 1.000                  | intron                            | NA                             | rs11238131, rs7785224                                                                                                                                                                                                                                                                       | T                            |
| rs730092   | DDC  | 7   | 50,503,248  | G            | C            | 0.428            | 0.995                  | intron                            | NA                             | rs10899734, rs10899735, rs11238138, rs11575457, rs11980368, rs12718527, rs12718528, rs12718529, rs12718541, rs13311361, rs1349492, rs1451372, rs2122822, rs2329365, rs2876827, rs3887825, rs4329234, rs4433100, rs4579483, rs4580999, rs4947577, rs4948196, rs4992502, rs6592952, rs7803247 | T                            |
| rs11238131 | DDC  | 7   | 50,506,083  | C            | T            | 0.284            | 1.000                  | intron                            | NA                             | rs4947535, rs7785224                                                                                                                                                                                                                                                                        | T                            |

**Supplemental Table 3: SNP Information**

| SNP        | Gene | Chr | Position   | Major Allele | Minor Allele | MAF <sup>a</sup> | Call Rate <sup>b</sup> | Chromosomal Location <sup>c</sup> | Amino Acid Change <sup>d</sup> | LD Bin ( $r^2 > 0.80$ ) <sup>e</sup>                                                                                                                                                                                                                                                       | Analysis Sample <sup>f</sup> |
|------------|------|-----|------------|--------------|--------------|------------------|------------------------|-----------------------------------|--------------------------------|--------------------------------------------------------------------------------------------------------------------------------------------------------------------------------------------------------------------------------------------------------------------------------------------|------------------------------|
| rs7803247  | DDC  | 7   | 50,508,237 | C            | T            | 0.424            | 0.993                  | intron                            | NA                             | rs10899734, rs10899735, rs11238138, rs11575457, rs11980368, rs12718527, rs12718528, rs12718529, rs12718541, rs13311361, rs1349492, rs1451372, rs2122822, rs2329365, rs2876827, rs3887825, rs4329234, rs4433100, rs4579483, rs4580999, rs4947577, rs4948196, rs4992502, rs6592952, rs730092 | T                            |
| rs11771818 | DDC  | 7   | 50,509,669 | G            | A            | 0.124            | 1.000                  | intron                            | NA                             | rs10268819, rs10499696, rs11575298, rs11575342, rs1466163, rs17553791, rs17634771, rs7809234                                                                                                                                                                                               | T                            |
| rs11772714 | DDC  | 7   | 50,510,337 | A            | G            | 0.196            | 0.998                  | intron                            | NA                             | rs10271341, rs10276473, rs11575320, rs11575463, rs17733244, rs2329371, rs2876829, rs3779078, rs3807555, rs3807556, rs3807558, rs745042, rs745043, rs896307, rs896309, rs9942686                                                                                                            | T                            |
| rs11238133 | DDC  | 7   | 50,510,408 | C            | A            | 0.324            | 0.976                  | intron                            | NA                             | rs11761683                                                                                                                                                                                                                                                                                 | T                            |
| rs732215   | DDC  | 7   | 50,511,557 | A            | C            | 0.451            | 0.998                  | intron                            | NA                             | rs10899736, rs12718574, rs1451371, rs3807566, rs3823674, rs4947582                                                                                                                                                                                                                         | T                            |
| rs896309   | DDC  | 7   | 50,512,516 | G            | A            | 0.198            | 1.000                  | intron                            | NA                             | rs10271341, rs10276473, rs11575320, rs11575463, rs11772714, rs17733244, rs2329371, rs2876829, rs3779078, rs3807555, rs3807556, rs3807558, rs745042, rs745043, rs896307, rs9942686                                                                                                          | T                            |
| rs4579483  | DDC  | 7   | 50,513,594 | T            | C            | 0.407            | 0.995                  | intron                            | NA                             | rs10899734, rs10899735, rs11238138, rs11575457, rs11980368, rs12718527, rs12718528, rs12718529, rs12718541, rs13311361, rs1349492, rs1451372, rs2122822, rs2329365, rs2876827, rs3887825, rs4329234, rs4433100, rs4580999, rs4947577, rs4948196, rs4992502, rs6592952, rs730092, rs7803247 | T                            |
| rs11575453 | DDC  | 7   | 50,515,359 | C            | T            | 0.084            | 0.998                  | intron                            | NA                             | rs11575383, rs11575387, rs17133853, rs2329368, rs7791875                                                                                                                                                                                                                                   | T                            |
| rs4947577  | DDC  | 7   | 50,516,103 | C            | G            | 0.410            | 0.998                  | intron                            | NA                             | rs10899734, rs10899735, rs11238138, rs11575457, rs11980368, rs12718527, rs12718528, rs12718529, rs12718541, rs13311361, rs1349492, rs1451372, rs2122822, rs2329365, rs2876827, rs3887825, rs4329234, rs4433100, rs4579483, rs4580999, rs4948196, rs4992502, rs6592952, rs730092, rs7803247 | T                            |
| rs17152020 | DDC  | 7   | 50,517,353 | T            | A            | 0.210            | 0.998                  | intron                            | NA                             | rs3779084, rs4490786, rs7808025, rs880028                                                                                                                                                                                                                                                  | T                            |

**Supplemental Table 3: SNP Information**

| SNP        | Gene | Chr | Position   | Major Allele | Minor Allele | MAF <sup>a</sup> | Call Rate <sup>b</sup> | Chromosomal Location <sup>c</sup> | Amino Acid Change <sup>d</sup> | LD Bin ( $r^2 > 0.80$ ) <sup>e</sup>                                                                                                                                                                                                                                                       | Analysis Sample <sup>f</sup> |
|------------|------|-----|------------|--------------|--------------|------------------|------------------------|-----------------------------------|--------------------------------|--------------------------------------------------------------------------------------------------------------------------------------------------------------------------------------------------------------------------------------------------------------------------------------------|------------------------------|
| rs1451372  | DDC  | 7   | 50,521,365 | G            | C            | 0.409            | 1.000                  | intron                            | NA                             | rs10899734, rs10899735, rs11238138, rs11575457, rs11980368, rs12718527, rs12718528, rs12718529, rs12718541, rs13311361, rs1349492, rs2122822, rs2329365, rs2876827, rs3887825, rs4329234, rs4433100, rs4579483, rs4580999, rs4947577, rs4948196, rs4992502, rs6592952, rs730092, rs7803247 | T                            |
| rs7790758  | DDC  | 7   | 50,529,038 | A            | G            | 0.198            | 1.000                  | intron                            | NA                             | NA                                                                                                                                                                                                                                                                                         | T                            |
| rs4602840  | DDC  | 7   | 50,530,315 | C            | A            | 0.126            | 1.000                  | intron                            | NA                             | rs1107743, rs11575548, rs17634717, rs17634958, rs17635123, rs2122817, rs2329367                                                                                                                                                                                                            | T                            |
| rs1037351  | DDC  | 7   | 50,532,898 | T            | C            | 0.337            | 0.998                  | intron                            | NA                             | rs1817074, rs2167364, rs2198144, rs4947584, rs7809758                                                                                                                                                                                                                                      | T                            |
| rs11575383 | DDC  | 7   | 50,535,184 | C            | A            | 0.071            | 1.000                  | intron                            | NA                             | rs11575387, rs11575453, rs17133853, rs2329368, rs7791875                                                                                                                                                                                                                                   | T                            |
| rs896307   | DDC  | 7   | 50,536,554 | C            | T            | 0.198            | 1.000                  | intron                            | NA                             | rs10271341, rs10276473, rs11575320, rs11575463, rs11772714, rs17733244, rs2329371, rs2876829, rs3779078, rs3807555, rs3807556, rs3807558, rs745042, rs745043, rs896309, rs9942686                                                                                                          | T                            |
| rs880028   | DDC  | 7   | 50,537,630 | A            | G            | 0.210            | 0.995                  | intron                            | NA                             | rs17152020, rs3779084, rs4490786, rs7808025                                                                                                                                                                                                                                                | T                            |
| rs4947584  | DDC  | 7   | 50,540,203 | A            | T            | 0.351            | 0.998                  | intron                            | NA                             | rs1037351, rs1817074, rs2167364, rs2198144, rs7809758                                                                                                                                                                                                                                      | T                            |
| rs6592961  | DDC  | 7   | 50,540,384 | G            | A            | 0.216            | 1.000                  | intron                            | NA                             | rs7808025                                                                                                                                                                                                                                                                                  | T                            |
| rs12718574 | DDC  | 7   | 50,541,342 | G            | C            | 0.435            | 1.000                  | intron                            | NA                             | rs10899736, rs1451371, rs3807566, rs3823674, rs4947582, rs732215                                                                                                                                                                                                                           | T                            |
| rs1817074  | DDC  | 7   | 50,541,506 | T            | C            | 0.366            | 1.000                  | intron                            | NA                             | rs1037351, rs2167364, rs2198144, rs4947584, rs7809758                                                                                                                                                                                                                                      | T                            |
| rs17635123 | DDC  | 7   | 50,543,469 | T            | C            | 0.125            | 1.000                  | intron                            | NA                             | rs1107743, rs11575548, rs17634717, rs17634958, rs2329367, rs4602840                                                                                                                                                                                                                        | T                            |
| rs1470750  | DDC  | 7   | 50,544,142 | C            | G            | 0.420            | 1.000                  | intron                            | NA                             | rs12718572, rs3807566                                                                                                                                                                                                                                                                      | T                            |
| rs2100280  | DDC  | 7   | 50,548,330 | A            | G            | 0.248            | 0.974                  | intron                            | NA                             | rs10244632, rs10249982, rs12535064, rs12538830, rs1982406, rs3735274, rs6592963, rs6944090, rs7777600, rs9918702                                                                                                                                                                           | T                            |
| rs1451368  | DDC  | 7   | 50,555,261 | C            | T            | 0.259            | 1.000                  | intron                            | NA                             | NA                                                                                                                                                                                                                                                                                         | T                            |
| rs10244632 | DDC  | 7   | 50,566,197 | C            | T            | 0.274            | 0.942                  | intron                            | NA                             | rs10249982, rs12535064, rs12538830, rs1982406, rs2100280, rs6592963, rs9918702                                                                                                                                                                                                             | T                            |
| rs11575321 | DDC  | 7   | 50,572,601 | C            | G            | 0.101            | 1.000                  | intron                            | NA                             | rs11575286, rs11575313, rs11575322, rs11575338, rs1349491, rs2876830, rs3807553, rs7456339                                                                                                                                                                                                 | T                            |
| rs11575313 | DDC  | 7   | 50,573,662 | T            | C            | 0.101            | 1.000                  | intron                            | NA                             | rs11575286, rs11575321, rs11575322, rs11575338, rs1349491, rs2876830, rs3807553, rs7456339                                                                                                                                                                                                 | T                            |

**Supplemental Table 3: SNP Information**

| SNP        | Gene | Chr | Position    | Major Allele | Minor Allele | MAF <sup>a</sup> | Call Rate <sup>b</sup> | Chromosomal Location <sup>c</sup> | Amino Acid Change <sup>d</sup> | LD Bin ( $r^2 > 0.80$ ) <sup>e</sup>                                                                                                                                                       | Analysis Sample <sup>f</sup> |
|------------|------|-----|-------------|--------------|--------------|------------------|------------------------|-----------------------------------|--------------------------------|--------------------------------------------------------------------------------------------------------------------------------------------------------------------------------------------|------------------------------|
| rs10268819 | DDC  | 7   | 50,577,565  | C            | T            | 0.124            | 0.954                  | intron                            | NA                             | rs10499696, rs11575298, rs11575342, rs11771818, rs1466163, rs17553791, rs17634771, rs7809234                                                                                               | G                            |
| rs3807552  | DDC  | 7   | 50,578,236  | G            | A            | 0.190            | 0.902                  | intron                            | NA                             | rs2329371, rs3735273, rs3807558, rs6950777                                                                                                                                                 | T                            |
| rs3779078  | DDC  | 7   | 50,578,412  | C            | T            | 0.197            | 1.000                  | intron                            | NA                             | rs10271341, rs10276473, rs11575320, rs11575463, rs11772714, rs17733244, rs2329371, rs2876829, rs3807555, rs3807556, rs3807558, rs745042, rs745043, rs896307, rs896309, rs9942686           | T                            |
| rs6264     | DDC  | 7   | 50,579,229  | C            | NA           | 0.000            | 1.000                  | coding                            | V17M (NP_000781)               | NA                                                                                                                                                                                         | NA                           |
| rs2044859  | DDC  | 7   | 50,580,056  | A            | G            | 0.353            | 1.000                  | intron                            | NA                             | rs3779074, rs7786398                                                                                                                                                                       | T                            |
| rs7786398  | DDC  | 7   | 50,580,400  | A            | G            | 0.453            | 1.000                  | intron                            | NA                             | rs10499694, rs11575334, rs11765748, rs2044859, rs3779074, rs4947644, rs998850                                                                                                              | T                            |
| rs10276473 | DDC  | 7   | 50,580,491  | G            | T            | 0.208            | 0.998                  | intron                            | NA                             | rs10271341, rs11575320, rs11575463, rs11772714, rs17733244, rs2329371, rs2876829, rs3779078, rs3807555, rs3807556, rs3807558, rs745042, rs745043, rs7803440, rs896307, rs896309, rs9942686 | T                            |
| rs11765748 | DDC  | 7   | 50,583,110  | A            | T            | 0.488            | 1.000                  | intron                            | NA                             | rs10499694, rs11575334, rs4947644, rs7786398, rs998850                                                                                                                                     | T                            |
| rs7456339  | DDC  | 7   | 50,583,334  | A            | G            | 0.135            | 1.000                  | intron                            | NA                             | rs11575286, rs11575313, rs11575321, rs11575322, rs11575338, rs1349491, rs2876830, rs3807553                                                                                                | T                            |
| rs10499695 | DDC  | 7   | 50,586,098  | C            | T            | 0.487            | 1.000                  | intron                            | NA                             | rs4947644                                                                                                                                                                                  | T                            |
| rs4947644  | DDC  | 7   | 50,586,370  | T            | C            | 0.500            | 1.000                  | intron                            | NA                             | rs10499694, rs10499695, rs11575334, rs11765748, rs7786398, rs7804365, rs998850                                                                                                             | T                            |
| rs2329340  | DDC  | 7   | 50,587,723  | C            | T            | 0.330            | 1.000                  | intron                            | NA                             | rs10250513, rs1451373, rs1451374, rs1451375, rs1966839, rs2329341, rs2329342, rs4452748, rs6593010, rs6949897, rs6962356, rs6969081, rs921450, rs921451                                    | T                            |
| rs11954565 | DRD1 | 5   | 174,782,513 | A            | G            | 0.364            | 0.995                  | flanking 3'UTR                    | NA                             | rs2644635                                                                                                                                                                                  | T                            |
| rs1587176  | DRD1 | 5   | 174,783,796 | T            | G            | 0.161            | 0.990                  | flanking 3'UTR                    | NA                             | NA                                                                                                                                                                                         | T                            |
| rs1310277  | DRD1 | 5   | 174,786,176 | G            | A            | 0.133            | 1.000                  | flanking 3'UTR                    | NA                             | rs266002                                                                                                                                                                                   | T                            |
| rs11739696 | DRD1 | 5   | 174,789,227 | G            | A            | 0.386            | 1.000                  | flanking 3'UTR                    | NA                             | rs2453737, rs265967, rs6881740                                                                                                                                                             | T                            |
| rs2453737  | DRD1 | 5   | 174,791,508 | T            | C            | 0.391            | 1.000                  | flanking 3'UTR                    | NA                             | rs11739696, rs265967, rs6881740                                                                                                                                                            | T                            |
| rs6881740  | DRD1 | 5   | 174,791,768 | C            | G            | 0.372            | 0.990                  | flanking 3'UTR                    | NA                             | rs11739696, rs2453737, rs265967                                                                                                                                                            | T                            |
| rs11742274 | DRD1 | 5   | 174,792,103 | C            | G            | 0.188            | 0.998                  | flanking 3'UTR                    | NA                             | rs10039221, rs10476156, rs11746172                                                                                                                                                         | T                            |
| rs265971   | DRD1 | 5   | 174,793,017 | T            | C            | 0.276            | 0.998                  | flanking 3'UTR                    | NA                             | rs265969                                                                                                                                                                                   | T                            |
| rs265972   | DRD1 | 5   | 174,793,122 | A            | G            | 0.462            | 0.998                  | flanking 3'UTR                    | NA                             | NA                                                                                                                                                                                         | T                            |
| rs265973   | DRD1 | 5   | 174,793,305 | C            | T            | 0.435            | 1.000                  | flanking 3'UTR                    | NA                             | rs265968                                                                                                                                                                                   | T                            |

**Supplemental Table 3: SNP Information**

| SNP        | Gene | Chr | Position    | Major Allele | Minor Allele | MAF <sup>a</sup> | Call Rate <sup>b</sup> | Chromosomal Location <sup>c</sup> | Amino Acid Change <sup>d</sup> | LD Bin ( $r^2 > 0.80$ ) <sup>e</sup>                                                                                                                                                                               | Analysis Sample <sup>f</sup> |
|------------|------|-----|-------------|--------------|--------------|------------------|------------------------|-----------------------------------|--------------------------------|--------------------------------------------------------------------------------------------------------------------------------------------------------------------------------------------------------------------|------------------------------|
| rs265974   | DRD1 | 5   | 174,793,846 | A            | G            | 0.329            | 0.998                  | flanking 3'UTR                    | NA                             | rs265975                                                                                                                                                                                                           | T                            |
| rs265975   | DRD1 | 5   | 174,794,801 | C            | T            | 0.325            | 0.995                  | flanking 3'UTR                    | NA                             | rs265974                                                                                                                                                                                                           | T                            |
| rs265976   | DRD1 | 5   | 174,795,026 | G            | T            | 0.177            | 0.998                  | flanking 3'UTR                    | NA                             | rs265977                                                                                                                                                                                                           | T                            |
| rs10476156 | DRD1 | 5   | 174,795,276 | A            | G            | 0.144            | 1.000                  | flanking 3'UTR                    | NA                             | rs10039221, rs11742274, rs11746172                                                                                                                                                                                 | T                            |
| rs265977   | DRD1 | 5   | 174,795,863 | C            | T            | 0.165            | 0.995                  | flanking 3'UTR                    | NA                             | rs265976                                                                                                                                                                                                           | T                            |
| rs863126   | DRD1 | 5   | 174,795,954 | A            | T            | 0.341            | 1.000                  | flanking 3'UTR                    | NA                             | NA                                                                                                                                                                                                                 | T                            |
| rs835616   | DRD1 | 5   | 174,796,296 | G            | A            | 0.359            | 0.998                  | flanking 3'UTR                    | NA                             | NA                                                                                                                                                                                                                 | T                            |
| rs835540   | DRD1 | 5   | 174,796,497 | T            | C            | 0.267            | 0.995                  | flanking 3'UTR                    | NA                             | NA                                                                                                                                                                                                                 | T                            |
| rs4867796  | DRD1 | 5   | 174,798,127 | A            | C            | 0.173            | 1.000                  | flanking 3'UTR                    | NA                             | rs11738801, rs11746641, rs11747886, rs2168631, rs4867797                                                                                                                                                           | T                            |
| rs11746641 | DRD1 | 5   | 174,798,697 | T            | G            | 0.161            | 1.000                  | flanking 3'UTR                    | NA                             | rs11738801, rs11747886, rs11749035, rs2168631, rs4867796, rs4867797                                                                                                                                                | T                            |
| rs11749676 | DRD1 | 5   | 174,798,904 | G            | A            | 0.409            | 0.998                  | flanking 3'UTR                    | NA                             | rs2471005, rs265978, rs265981, rs267417, rs4532, rs686                                                                                                                                                             | T                            |
| rs5326     | DRD1 | 5   | 174,802,802 | C            | T            | 0.127            | 1.000                  | intron                            | NA                             | rs12518222, rs28465440                                                                                                                                                                                             | T                            |
| rs265981   | DRD1 | 5   | 174,803,508 | G            | A            | 0.408            | 0.904                  | 5'UTR                             | NA                             | rs2471005, rs11749676, rs265978, rs267417, rs4532, rs686                                                                                                                                                           | T                            |
| rs2168631  | DRD1 | 5   | 174,808,608 | G            | A            | 0.171            | 1.000                  | flanking 5'UTR                    | NA                             | rs11738801, rs11746641, rs11747886, rs11749035, rs4867796, rs4867797                                                                                                                                               | T                            |
| rs6878159  | DRD1 | 5   | 174,809,007 | A            | T            | 0.010            | 1.000                  | flanking 5'UTR                    | NA                             | rs10042051                                                                                                                                                                                                         | NA                           |
| rs267417   | DRD1 | 5   | 174,813,120 | G            | T            | 0.394            | 1.000                  | flanking 5'UTR                    | NA                             | rs2471005, rs11749676, rs2471020, rs265981, rs4532                                                                                                                                                                 | T                            |
| rs2471005  | DRD1 | 5   | 174,814,813 | G            | A            | 0.393            | 0.998                  | flanking 5'UTR                    | NA                             | rs11749676, rs2471020, rs265981, rs267417, rs4532, rs686                                                                                                                                                           | T                            |
| rs267400   | DRD1 | 5   | 174,815,305 | C            | T            | 0.425            | 0.998                  | flanking 5'UTR                    | NA                             | rs267405, rs267406, rs267407, rs267409, rs267418                                                                                                                                                                   | T                            |
| rs11749035 | DRD1 | 5   | 174,815,658 | C            | T            | 0.159            | 1.000                  | flanking 5'UTR                    | NA                             | rs11738801, rs11746641, rs11747886, rs2168631, rs4867797                                                                                                                                                           | T                            |
| rs267405   | DRD1 | 5   | 174,817,158 | G            | T            | 0.424            | 1.000                  | flanking 5'UTR                    | NA                             | rs267400, rs267406, rs267407, rs267409, rs267418                                                                                                                                                                   | T                            |
| rs267406   | DRD1 | 5   | 174,817,347 | G            | T            | 0.424            | 1.000                  | flanking 5'UTR                    | NA                             | rs267400, rs267405, rs267407, rs267409, rs267418                                                                                                                                                                   | T                            |
| rs10042051 | DRD1 | 5   | 174,819,467 | A            | G            | 0.012            | 1.000                  | flanking 5'UTR                    | NA                             | rs6878159                                                                                                                                                                                                          | NA                           |
| rs2440390  | DRD2 | 11  | 112,792,088 | C            | T            | 0.135            | 1.000                  | intron                            | NA                             | rs12574471                                                                                                                                                                                                         | T                            |
| rs1079727  | DRD2 | 11  | 112,794,392 | T            | C            | 0.180            | 1.000                  | intron                            | NA                             | rs1076560, rs1079594, rs1079595, rs1079596, rs1079597, rs11214599, rs11214601, rs11214607, rs1124491, rs1125394, rs2075654, rs2283265, rs2471851, rs2471854, rs2471857, rs2734836, rs4648319, rs7103679, rs7350522 | T                            |

**Supplemental Table 3: SNP Information**

| SNP        | Gene | Chr | Position    | Major Allele | Minor Allele | MAF <sup>a</sup> | Call Rate <sup>b</sup> | Chromosomal Location <sup>c</sup> | Amino Acid Change <sup>d</sup> | LD Bin ( $r^2 > 0.80$ ) <sup>e</sup>                                                                                                                                                                               | Analysis Sample <sup>f</sup> |
|------------|------|-----|-------------|--------------|--------------|------------------|------------------------|-----------------------------------|--------------------------------|--------------------------------------------------------------------------------------------------------------------------------------------------------------------------------------------------------------------|------------------------------|
| rs2734833  | DRD2 | 11  | 112,798,130 | A            | G            | 0.419            | 0.978                  | intron                            | NA                             | rs1076563, rs1107162, rs1116313, rs12363125, rs12364051, rs12800853, rs2587548, rs2734831, rs2734837, rs2734838, rs2734839, rs4587762, rs4938017, rs7122246, rs7131440                                             | T                            |
| rs1076562  | DRD2 | 11  | 112,801,218 | G            | A            | 0.245            | 1.000                  | intron                            | NA                             | rs2002453, rs2005313, rs2245805, rs4586205, rs4648318                                                                                                                                                              | T                            |
| rs2471851  | DRD2 | 11  | 112,806,279 | A            | C            | 0.180            | 1.000                  | intron                            | NA                             | rs1076560, rs1079594, rs1079595, rs1079596, rs1079597, rs1079727, rs11214599, rs11214601, rs11214607, rs1124491, rs1125394, rs2075654, rs2283265, rs2471854, rs2471857, rs2734836, rs4648319, rs7103679, rs7350522 | T                            |
| rs7122246  | DRD2 | 11  | 112,809,667 | A            | G            | 0.424            | 0.998                  | intron                            | NA                             | rs1076563, rs1107162, rs1116313, rs12363125, rs12364051, rs12800853, rs2587548, rs2734831, rs2734833, rs2734837, rs2734838, rs2734839, rs4587762, rs4938017, rs7131440                                             | T                            |
| rs4436578  | DRD2 | 11  | 112,811,975 | T            | C            | 0.120            | 1.000                  | intron                            | NA                             | rs1124492, rs17115583, rs4620755                                                                                                                                                                                   | T                            |
| rs4587762  | DRD2 | 11  | 112,812,103 | A            | G            | 0.428            | 1.000                  | intron                            | NA                             | rs1076563, rs1107162, rs1116313, rs12363125, rs12364051, rs12800853, rs2587548, rs2734831, rs2734833, rs2734837, rs2734838, rs2734839, rs4938017, rs7122246, rs7131440                                             | T                            |
| rs4586205  | DRD2 | 11  | 112,812,339 | T            | G            | 0.251            | 1.000                  | intron                            | NA                             | rs1076562, rs2002453, rs2005313, rs2245805, rs4648318                                                                                                                                                              | T                            |
| rs4620755  | DRD2 | 11  | 112,814,829 | G            | A            | 0.113            | 0.998                  | intron                            | NA                             | rs1124492, rs17115583, rs4436578                                                                                                                                                                                   | T                            |
| rs7125415  | DRD2 | 11  | 112,815,891 | C            | T            | 0.090            | 1.000                  | intron                            | NA                             | rs17115583                                                                                                                                                                                                         | T                            |
| rs4936270  | DRD2 | 11  | 112,823,618 | C            | T            | 0.102            | 0.998                  | intron                            | NA                             | rs11214613, rs4245148, rs4460839, rs4581480, rs4936274                                                                                                                                                             | T                            |
| rs4274224  | DRD2 | 11  | 112,824,662 | A            | G            | 0.450            | 0.998                  | intron                            | NA                             | rs4245146, rs4245147, rs4936271                                                                                                                                                                                    | T                            |
| rs4245148  | DRD2 | 11  | 112,825,629 | C            | T            | 0.105            | 0.998                  | intron                            | NA                             | rs11214613, rs4460839, rs4581480, rs4936270, rs4936274                                                                                                                                                             | T                            |
| rs4460839  | DRD2 | 11  | 112,827,006 | T            | C            | 0.094            | 0.998                  | intron                            | NA                             | rs11214613, rs4245148, rs4581480, rs4936270, rs4936274                                                                                                                                                             | T                            |
| rs7122454  | DRD2 | 11  | 112,832,678 | G            | C            | 0.145            | 1.000                  | intron                            | NA                             | rs10891551, rs11214611, rs4350392, rs4648317, rs4938019                                                                                                                                                            | T                            |
| rs7131056  | DRD2 | 11  | 112,834,984 | C            | A            | 0.446            | 1.000                  | intron                            | NA                             | NA                                                                                                                                                                                                                 | T                            |
| rs11214611 | DRD2 | 11  | 112,835,429 | A            | G            | 0.146            | 1.000                  | intron                            | NA                             | rs10891551, rs4648317, rs7122454                                                                                                                                                                                   | T                            |
| rs10891552 | DRD2 | 11  | 112,838,881 | A            | T            | 0.034            | 1.000                  | intron                            | NA                             | NA                                                                                                                                                                                                                 | NA                           |
| rs4630328  | DRD2 | 11  | 112,839,419 | G            | A            | 0.347            | 0.998                  | intron                            | NA                             | rs17601612, rs6589377                                                                                                                                                                                              | T                            |
| rs11214613 | DRD2 | 11  | 112,840,469 | G            | A            | 0.086            | 1.000                  | intron                            | NA                             | rs4245148, rs4460839, rs4581480, rs4936270, rs4936274                                                                                                                                                              | T                            |
| rs4938019  | DRD2 | 11  | 112,846,601 | T            | C            | 0.148            | 0.998                  | intron                            | NA                             | rs10891551, rs4350392, rs4648317, rs7122454                                                                                                                                                                        | T                            |



**Supplemental Table 3: SNP Information**

| SNP        | Gene | Chr | Position    | Major Allele | Minor Allele | MAF <sup>a</sup> | Call Rate <sup>b</sup> | Chromosomal Location <sup>c</sup> | Amino Acid Change <sup>d</sup> | LD Bin ( $r^2 > 0.80$ ) <sup>e</sup>                            | Analysis Sample <sup>f</sup> |
|------------|------|-----|-------------|--------------|--------------|------------------|------------------------|-----------------------------------|--------------------------------|-----------------------------------------------------------------|------------------------------|
| rs1799978  | DRD2 | 11  | 112,851,561 | T            | C            | 0.059            | 1.000                  | flanking 5'UTR                    | NA                             | NA                                                              | T                            |
| rs10891556 | DRD2 | 11  | 112,857,971 | G            | T            | 0.171            | 0.983                  | flanking 5'UTR                    | NA                             | NA                                                              | T                            |
| rs6589377  | DRD2 | 11  | 112,860,946 | A            | G            | 0.349            | 1.000                  | flanking 5'UTR                    | NA                             | rs17601612, rs4630328                                           | T                            |
| rs10934253 | DRD3 | 3   | 115,320,474 | A            | T            | 0.031            | 1.000                  | flanking 3'UTR                    | NA                             | NA                                                              | NA                           |
| rs1385884  | DRD3 | 3   | 115,324,315 | T            | A            | 0.431            | 0.998                  | flanking 3'UTR                    | NA                             | rs1486012, rs2087017, rs3732790, rs3773679, rs963468            | T                            |
| rs2087017  | DRD3 | 3   | 115,324,703 | A            | G            | 0.433            | 1.000                  | flanking 3'UTR                    | NA                             | rs1385884, rs1486012, rs3732790, rs3773679, rs963468            | T                            |
| rs2399496  | DRD3 | 3   | 115,328,703 | A            | T            | 0.481            | 1.000                  | flanking 3'UTR                    | NA                             | rs9817063                                                       | T                            |
| rs2134655  | DRD3 | 3   | 115,340,891 | C            | T            | 0.266            | 1.000                  | flanking 3'UTR                    | NA                             | NA                                                              | T                            |
| rs963468   | DRD3 | 3   | 115,345,577 | G            | A            | 0.387            | 1.000                  | flanking 3'UTR                    | NA                             | rs1385884, rs1486012, rs2087017, rs3732790, rs3773679           | T                            |
| rs324035   | DRD3 | 3   | 115,351,544 | C            | A            | 0.211            | 1.000                  | intron                            | NA                             | rs167771                                                        | T                            |
| rs3773679  | DRD3 | 3   | 115,352,025 | C            | T            | 0.387            | 1.000                  | intron                            | NA                             | rs1385884, rs1486012, rs2087017, rs3732790, rs963468            | T                            |
| rs3773678  | DRD3 | 3   | 115,352,768 | G            | A            | 0.153            | 1.000                  | intron                            | NA                             | rs324036, rs9880168                                             | T                            |
| rs2630349  | DRD3 | 3   | 115,356,062 | G            | A            | 0.068            | 1.000                  | intron                            | NA                             | rs2630350, rs2630351, rs324032                                  | T                            |
| rs2630350  | DRD3 | 3   | 115,357,686 | C            | T            | 0.068            | 1.000                  | intron                            | NA                             | rs2630349, rs2630351, rs324032                                  | T                            |
| rs167771   | DRD3 | 3   | 115,358,965 | A            | G            | 0.193            | 1.000                  | intron                            | NA                             | rs324035                                                        | T                            |
| rs324032   | DRD3 | 3   | 115,360,518 | A            | G            | 0.068            | 1.000                  | intron                            | NA                             | rs2630349, rs2630350, rs2630351                                 | T                            |
| rs167770   | DRD3 | 3   | 115,362,252 | A            | G            | 0.284            | 0.993                  | intron                            | NA                             | rs11721264, rs226082, rs324022, rs324029, rs324030, rs7625282   | T                            |
| rs7625282  | DRD3 | 3   | 115,364,217 | A            | G            | 0.254            | 1.000                  | intron                            | NA                             | rs11721264, rs167770, rs226082, rs324022, rs324029, rs324030    | T                            |
| rs324029   | DRD3 | 3   | 115,364,313 | G            | A            | 0.285            | 1.000                  | intron                            | NA                             | rs11721264, rs167770, rs226082, rs324022, rs324030, rs7625282   | T                            |
| rs7633291  | DRD3 | 3   | 115,369,758 | T            | G            | 0.196            | 0.995                  | intron                            | NA                             | rs10934256, rs1587756, rs1587757, rs1800828                     | T                            |
| rs324022   | DRD3 | 3   | 115,369,988 | G            | A            | 0.287            | 1.000                  | intron                            | NA                             | rs11721264, rs167770, rs226082, rs324029, rs324030, rs7625282   | T                            |
| rs1486009  | DRD3 | 3   | 115,371,222 | A            | G            | 0.059            | 1.000                  | intron                            | NA                             | rs1486008, rs1486011, rs16822416                                | T                            |
| rs6280     | DRD3 | 3   | 115,373,505 | T            | C            | 0.343            | 0.988                  | coding                            | S9G<br>(NP_387509)             | rs12639080, rs324026, rs7629232, rs7638876, rs7638961           | T                            |
| rs324026   | DRD3 | 3   | 115,373,732 | T            | C            | 0.339            | 0.998                  | flanking 5'UTR                    | NA                             | rs11721264, rs12639080, rs6280, rs7629232, rs7638876, rs7638961 | T                            |
| rs7638876  | DRD3 | 3   | 115,376,990 | T            | C            | 0.347            | 0.998                  | flanking 3'UTR                    | NA                             | rs11721264, rs12639080, rs324026, rs6280, rs7629232, rs7638961  | T                            |
| rs9825563  | DRD3 | 3   | 115,382,910 | A            | G            | 0.310            | 0.995                  | flanking 5'UTR                    | NA                             | rs1800828                                                       | T                            |
| rs12639080 | DRD3 | 3   | 115,386,481 | G            | A            | 0.343            | 0.998                  | flanking 5'UTR                    | NA                             | rs324026, rs6280, rs7629232, rs7638876, rs7638961               | T                            |
| rs7932167  | DRD4 | 11  | 610,599     | T            | G            | 0.212            | 0.998                  | intron                            | NA                             | NA                                                              | T                            |
| rs12280580 | DRD4 | 11  | 616,220     | C            | G            | 0.267            | 1.000                  | flanking 3'UTR                    | NA                             | NA                                                              | T                            |
| rs4987059  | DRD4 | 11  | 626,433     | G            | A            | 0.050            | 1.000                  | flanking 5'UTR                    | NA                             | NA                                                              | T                            |

**Supplemental Table 3: SNP Information**

| SNP        | Gene  | Chr | Position   | Major Allele | Minor Allele | MAF <sup>a</sup> | Call Rate <sup>b</sup> | Chromosomal Location <sup>c</sup> | Amino Acid Change <sup>d</sup> | LD Bin ( $r^2 > 0.80$ ) <sup>e</sup>                                                                                                                                                                                                                                                                                                                                                                                                | Analysis Sample <sup>f</sup> |
|------------|-------|-----|------------|--------------|--------------|------------------|------------------------|-----------------------------------|--------------------------------|-------------------------------------------------------------------------------------------------------------------------------------------------------------------------------------------------------------------------------------------------------------------------------------------------------------------------------------------------------------------------------------------------------------------------------------|------------------------------|
| rs936461   | DRD4  | 11  | 626,496    | G            | A            | 0.355            | 0.940                  | flanking 5'UTR                    | NA                             | NA                                                                                                                                                                                                                                                                                                                                                                                                                                  | T                            |
| rs1800443  | DRD4  | 11  | 629,830    | T            | NA           | 0.000            | 0.998                  | coding                            | V194G<br>(NP_000788)           | NA                                                                                                                                                                                                                                                                                                                                                                                                                                  | NA                           |
| rs11246226 | DRD4  | 11  | 631,191    | A            | C            | 0.484            | 0.914                  | flanking 3'UTR                    | NA                             | rs4331145, rs936465                                                                                                                                                                                                                                                                                                                                                                                                                 | G                            |
| rs936465   | DRD4  | 11  | 633,568    | C            | G            | 0.449            | 0.911                  | flanking 3'UTR                    | NA                             | rs11246226, rs4331145                                                                                                                                                                                                                                                                                                                                                                                                               | T                            |
| rs10902188 | DRD4  | 11  | 644,043    | G            | A            | 0.089            | 1.000                  | coding                            | NA                             | NA                                                                                                                                                                                                                                                                                                                                                                                                                                  | T                            |
| rs6598007  | DRD4  | 11  | 646,523    | C            | T            | 0.065            | 1.000                  | intron                            | NA                             | NA                                                                                                                                                                                                                                                                                                                                                                                                                                  | T                            |
| rs4963126  | DRD4  | 11  | 646,845    | G            | A            | 0.482            | 1.000                  | intron                            | NA                             | NA                                                                                                                                                                                                                                                                                                                                                                                                                                  | T                            |
| rs11603404 | DRD4  | 11  | 646,940    | G            | A            | 0.150            | 1.000                  | intron                            | NA                             | NA                                                                                                                                                                                                                                                                                                                                                                                                                                  | T                            |
| rs7655090  | DRD5  | 4   | 9,374,973  | A            | G            | 0.321            | 1.000                  | flanking 5'UTR                    | NA                             | rs2867383, rs10001006, rs10003216,<br>rs10033951, rs11731100, rs13106539,<br>rs1519097, rs2280207                                                                                                                                                                                                                                                                                                                                   | T                            |
| rs10939514 | DRD5  | 4   | 9,382,294  | T            | C            | 0.048            | 1.000                  | flanking 5'UTR                    | NA                             | rs10939504, rs10939507, rs1533615,<br>rs1850739, rs1850744, rs2280208, rs938556                                                                                                                                                                                                                                                                                                                                                     | NA                           |
| rs10939515 | DRD5  | 4   | 9,382,394  | G            | A            | 0.175            | 1.000                  | flanking 5'UTR                    | NA                             | NA                                                                                                                                                                                                                                                                                                                                                                                                                                  | T                            |
| rs10033951 | DRD5  | 4   | 9,388,678  | C            | T            | 0.313            | 0.983                  | flanking 5'UTR                    | NA                             | rs2867383, rs10001006, rs10003216,<br>rs11731100, rs13106539, rs1519097,<br>rs2280207, rs7655090                                                                                                                                                                                                                                                                                                                                    | T                            |
| rs2867383  | DRD5  | 4   | 9,397,033  | G            | A            | 0.323            | 1.000                  | flanking 3'UTR                    | NA                             | rs10001006, rs10003216, rs10033951,<br>rs11731100, rs13106539, rs1519097,<br>rs2280207, rs7655090                                                                                                                                                                                                                                                                                                                                   | T                            |
| rs1850744  | DRD5  | 4   | 9,399,810  | C            | T            | 0.046            | 0.981                  | flanking 3'UTR                    | NA                             | rs10939504, rs10939507, rs10939514,<br>rs1533615, rs1850739, rs2280208, rs938556                                                                                                                                                                                                                                                                                                                                                    | NA                           |
| rs13106539 | DRD5  | 4   | 9,406,801  | T            | C            | 0.374            | 1.000                  | flanking 3'UTR                    | NA                             | rs2867383, rs10001006, rs10003216,<br>rs10033951, rs11731100, rs2280206,<br>rs2280207, rs7655090, rs7685396                                                                                                                                                                                                                                                                                                                         | T                            |
| rs1519097  | DRD5  | 4   | 9,411,951  | A            | G            | 0.324            | 0.993                  | flanking 3'UTR                    | NA                             | rs2867383, rs10033951, rs7655090                                                                                                                                                                                                                                                                                                                                                                                                    | T                            |
| rs157198   | EPB41 | 1   | 29,076,494 | T            | C            | 0.082            | 0.998                  | flanking 5'UTR                    | NA                             | NA                                                                                                                                                                                                                                                                                                                                                                                                                                  | T                            |
| rs157220   | EPB41 | 1   | 29,083,883 | G            | A            | 0.377            | 0.993                  | flanking 5'UTR                    | NA                             | rs10915207, rs126013, rs126014                                                                                                                                                                                                                                                                                                                                                                                                      | T                            |
| rs126014   | EPB41 | 1   | 29,092,765 | A            | G            | 0.383            | 0.976                  | flanking 3'UTR                    | NA                             | rs10915207, rs126013, rs157220                                                                                                                                                                                                                                                                                                                                                                                                      | T                            |
| rs150093   | EPB41 | 1   | 29,101,418 | T            | C            | 0.134            | 1.000                  | flanking 3'UTR                    | NA                             | NA                                                                                                                                                                                                                                                                                                                                                                                                                                  | T                            |
| rs10915208 | EPB41 | 1   | 29,102,916 | T            | C            | 0.113            | 1.000                  | flanking 3'UTR                    | NA                             | rs12038347, rs12045054, rs12045750,<br>rs12047323                                                                                                                                                                                                                                                                                                                                                                                   | T                            |
| rs203298   | EPB41 | 1   | 29,105,251 | C            | G            | 0.087            | 0.998                  | flanking 3'UTR                    | NA                             | rs10158728, rs10915212, rs10915220,<br>rs10915223, rs1175044, rs12065644,<br>rs12065679, rs12070045, rs12072697,<br>rs12075737, rs12081600, rs12085162,<br>rs149933, rs157197, rs157231, rs157232,<br>rs157233, rs1613500, rs16837813,<br>rs1767803, rs203279, rs203283, rs203285,<br>rs203292, rs203299, rs2452767, rs4128350,<br>rs460745, rs551807, rs558956, rs570187,<br>rs575675, rs578800, rs6686152, rs7513398,<br>rs957634 | T                            |

**Supplemental Table 3: SNP Information**

| SNP        | Gene  | Chr | Position   | Major Allele | Minor Allele | MAF <sup>a</sup> | Call Rate <sup>b</sup> | Chromosomal Location <sup>c</sup> | Amino Acid Change <sup>d</sup> | LD Bin ( $r^2 > 0.80$ ) <sup>e</sup>                                                                                                                                                   | Analysis Sample <sup>f</sup> |
|------------|-------|-----|------------|--------------|--------------|------------------|------------------------|-----------------------------------|--------------------------------|----------------------------------------------------------------------------------------------------------------------------------------------------------------------------------------|------------------------------|
| rs203277   | EPB41 | 1   | 29,107,918 | A            | T            | 0.289            | 1.000                  | flanking 3'UTR                    | NA                             | rs1185779, rs12723108, rs150085, rs150087, rs150088, rs204060, rs2762682, rs2788889, rs2930836, rs2930838, rs2930842, rs2985325, rs2985334, rs2985340, rs2993712, rs2993715, rs3102739 | T                            |
| rs157194   | EPB41 | 1   | 29,108,306 | A            | G            | 0.120            | 1.000                  | flanking 3'UTR                    | NA                             | rs11581096, rs150083, rs157196, rs157213, rs2249138, rs2254241, rs2486198, rs2503015, rs2788890, rs2985329, rs2985330, rs2993713, rs4360499, rs4654381, rs6686151, rs9426306           | T                            |
| rs203278   | EPB41 | 1   | 29,114,784 | T            | C            | 0.356            | 1.000                  | flanking 3'UTR                    | NA                             | NA                                                                                                                                                                                     | T                            |
| rs157208   | EPB41 | 1   | 29,117,993 | T            | C            | 0.237            | 0.990                  | flanking 3'UTR                    | NA                             | rs1038493, rs157206, rs204057                                                                                                                                                          | T                            |
| rs150085   | EPB41 | 1   | 29,120,374 | A            | C            | 0.289            | 1.000                  | flanking 3'UTR                    | NA                             | rs1185779, rs12723108, rs150087, rs150088, rs203277, rs204060, rs2762682, rs2788889, rs2930836, rs2930838, rs2930842, rs2985325, rs2985334, rs2985340, rs2993712, rs2993715, rs3102739 | T                            |
| rs157213   | EPB41 | 1   | 29,126,858 | C            | G            | 0.119            | 0.995                  | flanking 3'UTR                    | NA                             | rs11581096, rs150083, rs157194, rs157196, rs2249138, rs2254241, rs2486198, rs2503015, rs2788890, rs2985329, rs2985330, rs2993713, rs4360499, rs4654381, rs6686151, rs9426306           | T                            |
| rs150089   | EPB41 | 1   | 29,131,901 | T            | C            | 0.324            | 1.000                  | flanking 3'UTR                    | NA                             | rs204058, rs204059, rs2762681, rs2930843, rs2985322, rs2985327, rs4578183, rs4654383, rs6656832                                                                                        | T                            |
| rs12038347 | EPB41 | 1   | 29,141,303 | A            | G            | 0.098            | 1.000                  | flanking 5'UTR                    | NA                             | rs10915208, rs12045054, rs12045750, rs12047323, rs16837840, rs957633                                                                                                                   | T                            |
| rs204057   | EPB41 | 1   | 29,144,644 | C            | A            | 0.236            | 0.995                  | flanking 5'UTR                    | NA                             | rs1038493, rs157206, rs157208                                                                                                                                                          | T                            |
| rs204060   | EPB41 | 1   | 29,152,213 | T            | C            | 0.277            | 1.000                  | flanking 5'UTR                    | NA                             | rs1185779, rs12723108, rs150085, rs150087, rs150088, rs203277, rs2762682, rs2788889, rs2930836, rs2930838, rs2930842, rs2985325, rs2985334, rs2985340, rs2993712, rs2993715, rs3102739 | T                            |
| rs2985319  | EPB41 | 1   | 29,162,203 | G            | A            | 0.011            | 1.000                  | flanking 5'UTR                    | NA                             | NA                                                                                                                                                                                     | NA                           |
| rs2985322  | EPB41 | 1   | 29,169,054 | T            | C            | 0.323            | 1.000                  | flanking 5'UTR                    | NA                             | rs150089, rs204058, rs204059, rs2762681, rs2930843, rs2985327, rs4578183, rs4654383, rs6656832                                                                                         | T                            |
| rs2985344  | EPB41 | 1   | 29,176,902 | G            | A            | 0.289            | 1.000                  | flanking 5'UTR                    | NA                             | NA                                                                                                                                                                                     | T                            |
| rs2762682  | EPB41 | 1   | 29,182,405 | C            | T            | 0.289            | 1.000                  | flanking 5'UTR                    | NA                             | rs1185779, rs12723108, rs150085, rs150087, rs150088, rs203277, rs204060, rs2788889, rs2930836, rs2930838, rs2930842, rs2985325, rs2985334, rs2985340, rs2993712, rs2993715, rs3102739  | T                            |

**Supplemental Table 3: SNP Information**

| SNP        | Gene  | Chr | Position   | Major Allele | Minor Allele | MAF <sup>a</sup> | Call Rate <sup>b</sup> | Chromosomal Location <sup>c</sup> | Amino Acid Change <sup>d</sup> | LD Bin ( $r^2 > 0.80$ ) <sup>e</sup>                                                                                                                                                                                                                                                                                                                                                                          | Analysis Sample <sup>f</sup> |
|------------|-------|-----|------------|--------------|--------------|------------------|------------------------|-----------------------------------|--------------------------------|---------------------------------------------------------------------------------------------------------------------------------------------------------------------------------------------------------------------------------------------------------------------------------------------------------------------------------------------------------------------------------------------------------------|------------------------------|
| rs12021667 | EPB41 | 1   | 29,183,661 | T            | C            | 0.387            | 1.000                  | flanking 5'UTR                    | NA                             | rs10429865, rs12021646, rs12039988, rs4654328, rs6702335                                                                                                                                                                                                                                                                                                                                                      | T                            |
| rs2762686  | EPB41 | 1   | 29,188,832 | G            | C            | 0.119            | 0.998                  | intron                            | NA                             | NA                                                                                                                                                                                                                                                                                                                                                                                                            | T                            |
| rs2985329  | EPB41 | 1   | 29,206,549 | G            | C            | 0.132            | 0.998                  | intron                            | NA                             | rs2452788, rs12072831, rs150083, rs157194, rs157196, rs157213, rs2249138, rs2254241, rs2486198, rs2503015, rs2788890, rs2985330, rs2985332, rs2985335, rs2993713, rs3003631, rs4360499, rs6686151, rs9426306                                                                                                                                                                                                  | T                            |
| rs16837840 | EPB41 | 1   | 29,207,867 | A            | C            | 0.098            | 1.000                  | intron                            | NA                             | rs12038347, rs12045750, rs957633                                                                                                                                                                                                                                                                                                                                                                              | T                            |
| rs2985331  | EPB41 | 1   | 29,207,950 | T            | C            | 0.154            | 0.998                  | intron                            | NA                             | rs12122962, rs12125204                                                                                                                                                                                                                                                                                                                                                                                        | T                            |
| rs12072697 | EPB41 | 1   | 29,209,878 | G            | A            | 0.088            | 0.995                  | intron                            | NA                             | rs10158728, rs10915212, rs10915220, rs10915223, rs1175044, rs12065644, rs12065679, rs12070045, rs12075737, rs12081600, rs12085162, rs149933, rs157197, rs157231, rs157232, rs157233, rs1613500, rs16837813, rs1767803, rs203279, rs203283, rs203285, rs203292, rs203298, rs203299, rs2452767, rs4128350, rs460745, rs551807, rs558956, rs570187, rs575675, rs575710, rs578800, rs6686152, rs7513398, rs957634 | T                            |
| rs2985332  | EPB41 | 1   | 29,211,686 | A            | G            | 0.151            | 0.998                  | intron                            | NA                             | rs2452788, rs12072831, rs2249138, rs2254241, rs2503015, rs2788890, rs2985329, rs2985330, rs2985335, rs2993713, rs3003631, rs9426306                                                                                                                                                                                                                                                                           | T                            |
| rs2985335  | EPB41 | 1   | 29,218,234 | G            | A            | 0.133            | 1.000                  | intron                            | NA                             | rs2452788, rs12072831, rs2249138, rs2254241, rs2503015, rs2788890, rs2985329, rs2985330, rs2985332, rs2993713, rs3003631, rs9426306                                                                                                                                                                                                                                                                           | T                            |
| rs11807517 | EPB41 | 1   | 29,223,797 | A            | NA           | 0.000            | 1.000                  | intron                            | NA                             | NA                                                                                                                                                                                                                                                                                                                                                                                                            | NA                           |
| rs10915216 | EPB41 | 1   | 29,229,250 | T            | A            | 0.488            | 0.995                  | intron                            | NA                             | rs12045777, rs4654390                                                                                                                                                                                                                                                                                                                                                                                         | T                            |
| rs2486200  | EPB41 | 1   | 29,236,572 | T            | C            | 0.234            | 0.998                  | intron                            | NA                             | rs12070152, rs2153165, rs2788888, rs2985337, rs2985338, rs3003627, rs3003628, rs502393, rs550712, rs6703599, rs7544914                                                                                                                                                                                                                                                                                        | T                            |
| rs12027267 | EPB41 | 1   | 29,251,462 | C            | A            | 0.389            | 0.998                  | intron                            | NA                             | NA                                                                                                                                                                                                                                                                                                                                                                                                            | T                            |
| rs2788888  | EPB41 | 1   | 29,252,579 | G            | A            | 0.234            | 1.000                  | flanking 3'UTR                    | NA                             | rs12070152, rs2153165, rs2486200, rs2985337, rs2985338, rs3003627, rs3003628, rs502393, rs550712, rs6703599, rs7544914                                                                                                                                                                                                                                                                                        | T                            |
| rs2153165  | EPB41 | 1   | 29,258,073 | G            | C            | 0.234            | 1.000                  | flanking 3'UTR                    | NA                             | rs12070152, rs2486200, rs2788888, rs2985337, rs2985338, rs3003627, rs3003628, rs502393, rs550712, rs6703599, rs7544914                                                                                                                                                                                                                                                                                        | T                            |

**Supplemental Table 3: SNP Information**

| SNP        | Gene    | Chr | Position   | Major Allele | Minor Allele | MAF <sup>a</sup> | Call Rate <sup>b</sup> | Chromosomal Location <sup>c</sup> | Amino Acid Change <sup>d</sup> | LD Bin ( $r^2 > 0.80$ ) <sup>e</sup>                                                                                                                                                                                                                                                                                                                                                                  | Analysis Sample <sup>f</sup> |
|------------|---------|-----|------------|--------------|--------------|------------------|------------------------|-----------------------------------|--------------------------------|-------------------------------------------------------------------------------------------------------------------------------------------------------------------------------------------------------------------------------------------------------------------------------------------------------------------------------------------------------------------------------------------------------|------------------------------|
| rs9426306  | EPB41   | 1   | 29,261,001 | C            | T            | 0.132            | 0.998                  | intron                            | NA                             | rs2452788, rs12072831, rs150083, rs157194, rs157196, rs157213, rs2249138, rs2254241, rs2486198, rs2503015, rs2788890, rs2985329, rs2985330, rs2985332, rs2985335, rs2993713, rs3003631, rs4360499, rs6686151                                                                                                                                                                                          | T                            |
| rs12072831 | EPB41   | 1   | 29,265,747 | G            | A            | 0.146            | 1.000                  | intron                            | NA                             | rs2452788, rs2249138, rs2254241, rs2503015, rs2788890, rs2985329, rs2985330, rs2985332, rs2985335, rs2993713, rs3003631, rs9426306                                                                                                                                                                                                                                                                    | T                            |
| rs12130351 | EPB41   | 1   | 29,269,534 | C            | T            | 0.070            | 0.998                  | intron                            | NA                             | NA                                                                                                                                                                                                                                                                                                                                                                                                    | T                            |
| rs6702335  | EPB41   | 1   | 29,283,837 | A            | G            | 0.385            | 1.000                  | intron                            | NA                             | rs10429865, rs12021646, rs12021667, rs12039988, rs4654328                                                                                                                                                                                                                                                                                                                                             | T                            |
| rs2254241  | EPB41   | 1   | 29,290,620 | G            | A            | 0.130            | 0.998                  | intron                            | NA                             | rs2452788, rs12072831, rs150083, rs157194, rs157196, rs157213, rs2249138, rs2486198, rs2503015, rs2788890, rs2985329, rs2985330, rs2985332, rs2985335, rs2993713, rs3003631, rs4360499, rs6686151, rs9426306                                                                                                                                                                                          | T                            |
| rs12039988 | EPB41   | 1   | 29,298,420 | G            | A            | 0.388            | 1.000                  | flanking 3'UTR                    | NA                             | rs10429865, rs12021646, rs12021667, rs4654328, rs6702335                                                                                                                                                                                                                                                                                                                                              | T                            |
| rs4654390  | EPB41   | 1   | 29,311,603 | T            | A            | 0.486            | 1.000                  | intron                            | NA                             | rs10915216, rs12045777                                                                                                                                                                                                                                                                                                                                                                                | T                            |
| rs575710   | EPB41   | 1   | 29,319,242 | A            | G            | 0.089            | 1.000                  | 3'UTR                             | NA                             | rs10158728, rs10915212, rs10915220, rs10915223, rs1175044, rs12065644, rs12065679, rs12070045, rs12072697, rs12075737, rs12081600, rs12085162, rs149933, rs157197, rs157231, rs157232, rs157233, rs1613500, rs16837813, rs1767803, rs203279, rs203283, rs203285, rs203292, rs203299, rs2452767, rs4128350, rs460745, rs551807, rs558956, rs570187, rs575675, rs578800, rs6686152, rs7513398, rs957634 | T                            |
| rs2452788  | EPB41   | 1   | 29,319,398 | G            | A            | 0.149            | 0.954                  | 3'UTR                             | NA                             | rs12072831, rs2249138, rs2254241, rs2503015, rs2788890, rs2985329, rs2985330, rs2985332, rs2985335, rs2993713, rs3003631, rs9426306                                                                                                                                                                                                                                                                   | G                            |
| rs484000   | EPB41   | 1   | 29,324,724 | G            | A            | 0.072            | 0.902                  | flanking 5'UTR                    | NA                             | NA                                                                                                                                                                                                                                                                                                                                                                                                    | T                            |
| rs6142508  | EPB41L1 | 20  | 34,160,719 | A            | G            | 0.174            | 1.000                  | flanking 5'UTR                    | NA                             | rs2746103, rs11700298, rs2069229, rs2425191, rs2590949, rs2590991, rs2746086, rs2746097, rs2746100, rs2746102, rs2746105, rs2752898, rs2859715, rs3813918, rs3850528, rs6060845, rs6141601, rs6142512, rs873925                                                                                                                                                                                       | T                            |

**Supplemental Table 3: SNP Information**

| SNP        | Gene    | Chr | Position   | Major Allele | Minor Allele | MAF <sup>a</sup> | Call Rate <sup>b</sup> | Chromosomal Location <sup>c</sup> | Amino Acid Change <sup>d</sup> | LD Bin ( $r^2 > 0.80$ ) <sup>e</sup>                                                                                                                                                                                                                                   | Analysis Sample <sup>f</sup> |
|------------|---------|-----|------------|--------------|--------------|------------------|------------------------|-----------------------------------|--------------------------------|------------------------------------------------------------------------------------------------------------------------------------------------------------------------------------------------------------------------------------------------------------------------|------------------------------|
| rs2746103  | EPB41L1 | 20  | 34,167,348 | T            | G            | 0.225            | 0.995                  | flanking 3'UTR                    | NA                             | rs11700298, rs2069229, rs2425191, rs2590949, rs2590991, rs2746086, rs2746097, rs2746100, rs2746102, rs2746105, rs2752898, rs2859715, rs3813918, rs3850528, rs6060845, rs6141601, rs6142508, rs6142512, rs761312, rs873925, rs964786                                    | T                            |
| rs6141600  | EPB41L1 | 20  | 34,175,724 | T            | C            | 0.280            | 0.981                  | flanking 3'UTR                    | NA                             | NA                                                                                                                                                                                                                                                                     | T                            |
| rs6121156  | EPB41L1 | 20  | 34,176,747 | A            | G            | 0.001            | 1.000                  | flanking 3'UTR                    | NA                             | NA                                                                                                                                                                                                                                                                     | NA                           |
| rs6142512  | EPB41L1 | 20  | 34,178,851 | A            | G            | 0.174            | 1.000                  | flanking 3'UTR                    | NA                             | rs2746103, rs11700298, rs2069229, rs2425191, rs2590949, rs2590991, rs2746086, rs2746097, rs2746100, rs2746102, rs2746105, rs2752898, rs2859715, rs3813918, rs3850528, rs6060845, rs6141601, rs6142508, rs873925                                                        | T                            |
| rs1474976  | EPB41L1 | 20  | 34,195,786 | A            | C            | 0.109            | 1.000                  | flanking 5'UTR                    | NA                             | NA                                                                                                                                                                                                                                                                     | T                            |
| rs6121163  | EPB41L1 | 20  | 34,200,451 | T            | G            | 0.047            | 1.000                  | flanking 5'UTR                    | NA                             | rs6058429                                                                                                                                                                                                                                                              | NA                           |
| rs7266316  | EPB41L1 | 20  | 34,203,883 | C            | NA           | 0.000            | 1.000                  | flanking 5'UTR                    | NA                             | NA                                                                                                                                                                                                                                                                     | NA                           |
| rs6060831  | EPB41L1 | 20  | 34,209,464 | T            | NA           | 0.000            | 0.998                  | intron                            | NA                             | NA                                                                                                                                                                                                                                                                     | NA                           |
| rs6058429  | EPB41L1 | 20  | 34,219,275 | A            | G            | 0.049            | 1.000                  | intron                            | NA                             | rs6121163                                                                                                                                                                                                                                                              | NA                           |
| rs6060845  | EPB41L1 | 20  | 34,233,225 | A            | G            | 0.248            | 0.998                  | intron                            | NA                             | rs2746103, rs1046383, rs11700298, rs11700361, rs2069229, rs2425191, rs2590949, rs2590991, rs2746086, rs2746097, rs2746100, rs2746102, rs2746105, rs2752898, rs2859715, rs3813918, rs3850528, rs6058435, rs6121179, rs6141601, rs6142508, rs6142512, rs709050, rs873925 | T                            |
| rs2247688  | EPB41L1 | 20  | 34,238,965 | A            | G            | 0.251            | 1.000                  | intron                            | NA                             | rs1046383, rs11700361, rs6058435, rs6121179, rs709050                                                                                                                                                                                                                  | T                            |
| rs6121179  | EPB41L1 | 20  | 34,256,911 | A            | G            | 0.187            | 0.993                  | intron                            | NA                             | rs1046383, rs11700298, rs11700361, rs2247688, rs2425191, rs2746086, rs3813918, rs6058435, rs6060845, rs709050                                                                                                                                                          | T                            |
| rs6119707  | EPB41L1 | 20  | 34,267,901 | A            | NA           | 0.000            | 0.995                  | flanking 3'UTR                    | NA                             | NA                                                                                                                                                                                                                                                                     | NA                           |
| rs11700361 | EPB41L1 | 20  | 34,285,729 | C            | T            | 0.171            | 0.998                  | flanking 3'UTR                    | NA                             | rs1046383, rs11700298, rs2247688, rs2425191, rs2746086, rs3813918, rs6058435, rs6060845, rs6121179, rs709050                                                                                                                                                           | T                            |
| rs709050   | EPB41L1 | 20  | 34,292,023 | G            | A            | 0.198            | 0.998                  | intron                            | NA                             | rs1046383, rs11700298, rs11700361, rs2247688, rs2425191, rs2590949, rs2746097, rs2752898, rs3813918, rs6058435, rs6060845, rs6121179                                                                                                                                   | T                            |

**Supplemental Table 3: SNP Information**

| SNP        | Gene    | Chr | Position    | Major Allele | Minor Allele | MAF <sup>a</sup> | Call Rate <sup>b</sup> | Chromosomal Location <sup>c</sup> | Amino Acid Change <sup>d</sup> | LD Bin ( $r^2 > 0.80$ ) <sup>e</sup>                                                                                                                                                                                                                                                                                                                                                                 | Analysis Sample <sup>f</sup> |
|------------|---------|-----|-------------|--------------|--------------|------------------|------------------------|-----------------------------------|--------------------------------|------------------------------------------------------------------------------------------------------------------------------------------------------------------------------------------------------------------------------------------------------------------------------------------------------------------------------------------------------------------------------------------------------|------------------------------|
| rs1413753  | EPB41L2 | 6   | 131,192,197 | C            | T            | 0.321            | 0.998                  | flanking 3'UTR                    | NA                             | rs1571911, rs2039830, rs2183969, rs2839942, rs4075265, rs4895898, rs6569709, rs6907284, rs6938309, rs6938735, rs7738572, rs7741462, rs7748468, rs7754351, rs7768048, rs9285468, rs9375777, rs9388867, rs998228                                                                                                                                                                                       | T                            |
| rs2281487  | EPB41L2 | 6   | 131,192,810 | T            | C            | 0.396            | 1.000                  | flanking 3'UTR                    | NA                             | rs1413755, rs2183967, rs3777434, rs3777435, rs3777436, rs4897468, rs4897473, rs6569707, rs6918160, rs6938552, rs7760965, rs7775013, rs9388861, rs9388863, rs9402292, rs942                                                                                                                                                                                                                           | T                            |
| rs1413755  | EPB41L2 | 6   | 131,195,892 | C            | T            | 0.368            | 0.998                  | flanking 3'UTR                    | NA                             | rs17770255, rs2183967, rs2281487, rs3777434, rs3777435, rs3777436, rs4895908, rs4897468, rs4897473, rs6569707, rs6569708, rs6918160, rs6919007, rs6931804, rs6938552, rs7760965, rs7775013, rs872576, rs9385564, rs9388861, rs9388863, rs942                                                                                                                                                         | T                            |
| rs6938735  | EPB41L2 | 6   | 131,196,596 | T            | C            | 0.307            | 1.000                  | flanking 3'UTR                    | NA                             | rs1006655, rs1334689, rs1413753, rs1571911, rs1999474, rs2039509, rs2039830, rs2183969, rs2184408, rs2839942, rs4075265, rs4895898, rs4897475, rs6536, rs6569709, rs6907284, rs6933789, rs6938309, rs761835, rs7738572, rs7741462, rs7748468, rs7754351, rs7761655, rs7766505, rs7768048, rs9285468, rs9375777, rs9375786, rs9388867, rs9388870, rs9388871, rs9402304, rs9402305, rs955191, rs998228 | T                            |
| rs2236081  | EPB41L2 | 6   | 131,196,716 | T            | C            | 0.283            | 1.000                  | flanking 3'UTR                    | NA                             | rs12202038, rs1413754, rs2236075, rs2281490, rs867707                                                                                                                                                                                                                                                                                                                                                | T                            |
| rs6975     | EPB41L2 | 6   | 131,197,795 | G            | T            | 0.258            | 1.000                  | flanking 3'UTR                    | NA                             | rs12199765, rs2281490, rs915171                                                                                                                                                                                                                                                                                                                                                                      | T                            |
| rs3734186  | EPB41L2 | 6   | 131,199,378 | T            | C            | 0.030            | 1.000                  | flanking 3'UTR                    | NA                             | NA                                                                                                                                                                                                                                                                                                                                                                                                   | NA                           |
| rs988749   | EPB41L2 | 6   | 131,201,181 | T            | G            | 0.291            | 1.000                  | flanking 3'UTR                    | NA                             | rs2184408, rs4075265, rs6536, rs6907284, rs6933789, rs761835, rs9375777, rs955191                                                                                                                                                                                                                                                                                                                    | T                            |
| rs17059669 | EPB41L2 | 6   | 131,201,485 | G            | A            | 0.016            | 1.000                  | flanking 3'UTR                    | NA                             | rs3822859                                                                                                                                                                                                                                                                                                                                                                                            | NA                           |
| rs6935267  | EPB41L2 | 6   | 131,204,791 | G            | T            | 0.162            | 1.000                  | intron                            | NA                             | NA                                                                                                                                                                                                                                                                                                                                                                                                   | T                            |

**Supplemental Table 3: SNP Information**

| SNP        | Gene    | Chr | Position    | Major Allele | Minor Allele | MAF <sup>a</sup> | Call Rate <sup>b</sup> | Chromosomal Location <sup>c</sup> | Amino Acid Change <sup>d</sup> | LD Bin ( $r^2 > 0.80$ ) <sup>e</sup>                                                                                                                                                                                                                                                                                                                                                                       | Analysis Sample <sup>f</sup> |
|------------|---------|-----|-------------|--------------|--------------|------------------|------------------------|-----------------------------------|--------------------------------|------------------------------------------------------------------------------------------------------------------------------------------------------------------------------------------------------------------------------------------------------------------------------------------------------------------------------------------------------------------------------------------------------------|------------------------------|
| rs6919007  | EPB41L2 | 6   | 131,206,179 | A            | T            | 0.366            | 1.000                  | intron                            | NA                             | rs13437326, rs1413755, rs17180687, rs17770255, rs17784418, rs17785507, rs2183967, rs28482889, rs3777434, rs3777435, rs3777436, rs4895901, rs4895903, rs4895907, rs4895908, rs4897468, rs4897473, rs4897484, rs4897485, rs6569707, rs6569708, rs6906478, rs6918160, rs6931804, rs6935108, rs6938552, rs7760965, rs7775013, rs872576, rs9385564, rs9388861, rs9388863, rs9402292, rs942, rs954211            | T                            |
| rs4897468  | EPB41L2 | 6   | 131,206,765 | T            | C            | 0.367            | 1.000                  | intron                            | NA                             | rs13437326, rs1413755, rs17180687, rs17770255, rs17784418, rs17785507, rs2183967, rs2281487, rs28482889, rs3777434, rs3777435, rs3777436, rs4895901, rs4895903, rs4895907, rs4895908, rs4897473, rs4897484, rs4897485, rs6569707, rs6569708, rs6906478, rs6918160, rs6919007, rs6931804, rs6935108, rs6938552, rs7760965, rs7775013, rs872576, rs9385564, rs9388861, rs9388863, rs9402292, rs942, rs954211 | T                            |
| rs4075265  | EPB41L2 | 6   | 131,208,150 | C            | T            | 0.307            | 1.000                  | intron                            | NA                             | rs1413753, rs1571911, rs2039830, rs2183969, rs2184408, rs4895898, rs6536, rs6569709, rs6907284, rs6933789, rs6938309, rs6938735, rs761835, rs7738572, rs7741462, rs7748468, rs7754351, rs7768048, rs9285468, rs9375777, rs9388867, rs955191, rs988749, rs998228                                                                                                                                            | T                            |
| rs10499174 | EPB41L2 | 6   | 131,209,689 | T            | G            | 0.023            | 1.000                  | intron                            | NA                             | rs1043598, rs12661081, rs12664355, rs12965, rs13193246, rs17059681, rs17059702, rs2236078, rs2275063, rs3777450, rs3777453, rs3777463, rs3822864, rs7747881, rs7769153                                                                                                                                                                                                                                     | NA                           |
| rs9402292  | EPB41L2 | 6   | 131,211,966 | A            | G            | 0.366            | 1.000                  | intron                            | NA                             | rs17180687, rs17770255, rs17784418, rs17785507, rs2183967, rs2281487, rs28482889, rs3777434, rs3777435, rs3777436, rs4895907, rs4897468, rs4897473, rs6569707, rs6569708, rs6906478, rs6919007, rs6931804, rs6935108, rs7760965, rs7775013, rs872576, rs9385564, rs9388861, rs9388863, rs954211                                                                                                            | T                            |
| rs928592   | EPB41L2 | 6   | 131,219,792 | G            | A            | 0.288            | 1.000                  | intron                            | NA                             | rs915171                                                                                                                                                                                                                                                                                                                                                                                                   | T                            |



**Supplemental Table 3: SNP Information**

| SNP        | Gene    | Chr | Position    | Major Allele | Minor Allele | MAF <sup>a</sup> | Call Rate <sup>b</sup> | Chromosomal Location <sup>c</sup> | Amino Acid Change <sup>d</sup> | LD Bin ( $r^2 > 0.80$ ) <sup>e</sup>                                                                                                                                                                                                                                                                                                                                                                                             | Analysis Sample <sup>f</sup> |
|------------|---------|-----|-------------|--------------|--------------|------------------|------------------------|-----------------------------------|--------------------------------|----------------------------------------------------------------------------------------------------------------------------------------------------------------------------------------------------------------------------------------------------------------------------------------------------------------------------------------------------------------------------------------------------------------------------------|------------------------------|
| rs10457561 | EPB41L2 | 6   | 131,223,025 | T            | C            | 0.161            | 1.000                  | intron                            | NA                             | rs10457562, rs10457563, rs11760051, rs12197829, rs12203760, rs17059954, rs3777432, rs4498389, rs6905151, rs6907809, rs6916206, rs7770892, rs9375785, rs9375787, rs9375788, rs9375789, rs9375794, rs9375797, rs9385567, rs9388860, rs9388876, rs9398967, rs9398971, rs9402306, rs9483210, rs9492792, rs954919                                                                                                                     | T                            |
| rs6569709  | EPB41L2 | 6   | 131,223,739 | C            | T            | 0.309            | 1.000                  | intron                            | NA                             | rs1006655, rs1334689, rs1413753, rs1571911, rs1999474, rs2039509, rs2039830, rs2105250, rs2183969, rs2184408, rs2839942, rs4075265, rs4895898, rs4897475, rs6536, rs6907284, rs6938309, rs6938735, rs761835, rs7738572, rs7741462, rs7748468, rs7754351, rs7761655, rs7766505, rs7768048, rs9285468, rs9375777, rs9375786, rs9388867, rs9388870, rs9388871, rs9402304, rs9402305, rs9492764, rs998228                            | T                            |
| rs933063   | EPB41L2 | 6   | 131,225,408 | C            | T            | 0.317            | 0.995                  | intron                            | NA                             | rs1043596, rs12194612, rs1811949, rs2095961, rs2281490, rs2297853, rs6921396, rs6922045, rs6922177, rs7741148, rs7769678, rs867707, rs915172, rs9321263, rs9372985                                                                                                                                                                                                                                                               | T                            |
| rs3777432  | EPB41L2 | 6   | 131,225,509 | G            | A            | 0.161            | 1.000                  | intron                            | NA                             | rs10457561, rs10457562, rs10457563, rs6905151, rs6916206, rs9385567, rs9388860, rs9402306                                                                                                                                                                                                                                                                                                                                        | T                            |
| rs915172   | EPB41L2 | 6   | 131,226,463 | T            | G            | 0.307            | 1.000                  | intron                            | NA                             | rs1043596, rs12194612, rs12202038, rs1811949, rs2095961, rs2236075, rs2281490, rs2297853, rs6921396, rs6922045, rs6922177, rs7741148, rs7769678, rs867707, rs9321263, rs933063, rs9372985, rs9492774                                                                                                                                                                                                                             | T                            |
| rs7775013  | EPB41L2 | 6   | 131,228,271 | T            | G            | 0.371            | 1.000                  | intron                            | NA                             | rs13437326, rs1413755, rs17180687, rs17770255, rs17784418, rs17785507, rs2183967, rs2281487, rs28482889, rs3777434, rs3777435, rs3777436, rs4895901, rs4895903, rs4895907, rs4895908, rs4897468, rs4897473, rs4897484, rs4897485, rs6569707, rs6569708, rs6906478, rs6918160, rs6919007, rs6926250, rs6928920, rs6931804, rs6935108, rs6938552, rs7760965, rs872576, rs9385564, rs9388861, rs9388863, rs9402292, rs942, rs954211 | T                            |

**Supplemental Table 3: SNP Information**

| SNP        | Gene    | Chr | Position    | Major Allele | Minor Allele | MAF <sup>a</sup> | Call Rate <sup>b</sup> | Chromosomal Location <sup>c</sup> | Amino Acid Change <sup>d</sup> | LD Bin ( $r^2 > 0.80$ ) <sup>e</sup>                                                                                                                                                                                                                                                                                                                                                                                             | Analysis Sample <sup>f</sup> |
|------------|---------|-----|-------------|--------------|--------------|------------------|------------------------|-----------------------------------|--------------------------------|----------------------------------------------------------------------------------------------------------------------------------------------------------------------------------------------------------------------------------------------------------------------------------------------------------------------------------------------------------------------------------------------------------------------------------|------------------------------|
| rs17059736 | EPB41L2 | 6   | 131,232,531 | G            | A            | 0.125            | 1.000                  | coding                            | NA                             | rs10499177, rs12527605, rs12528626, rs12529894, rs17059678, rs17059852, rs17832366, rs3777452, rs3798251, rs6941909, rs9492762                                                                                                                                                                                                                                                                                                   | T                            |
| rs3777438  | EPB41L2 | 6   | 131,241,795 | C            | A            | 0.163            | 0.978                  | intron                            | NA                             | rs12110524, rs12206057, rs12530288, rs3777457, rs3777458, rs4357159, rs6938586, rs9321260, rs9492755                                                                                                                                                                                                                                                                                                                             | T                            |
| rs3822859  | EPB41L2 | 6   | 131,248,402 | A            | T            | 0.014            | 0.998                  | intron                            | NA                             | rs17059669                                                                                                                                                                                                                                                                                                                                                                                                                       | NA                           |
| rs3798249  | EPB41L2 | 6   | 131,249,136 | T            | C            | 0.484            | 0.998                  | intron                            | NA                             | rs12193574, rs2068147, rs3777440, rs3777441, rs3777442, rs3777455, rs3777461, rs3777466, rs3798250, rs3822863, rs4897471, rs4897472, rs9402299                                                                                                                                                                                                                                                                                   | T                            |
| rs2839942  | EPB41L2 | 6   | 131,250,191 | G            | A            | 0.315            | 0.998                  | intron                            | NA                             | rs1413753, rs1571911, rs2039509, rs2039830, rs2183969, rs4895898, rs6569709, rs6907284, rs6938309, rs6938735, rs7738572, rs7741462, rs7748468, rs7754351, rs7768048, rs9285468, rs9375777, rs9388867, rs998228                                                                                                                                                                                                                   | T                            |
| rs12206057 | EPB41L2 | 6   | 131,254,210 | A            | T            | 0.169            | 1.000                  | intron                            | NA                             | rs12110524, rs3777438, rs3777457, rs3777458, rs4357159, rs6938586, rs9321260, rs9492755                                                                                                                                                                                                                                                                                                                                          | T                            |
| rs4897472  | EPB41L2 | 6   | 131,254,831 | A            | G            | 0.483            | 1.000                  | intron                            | NA                             | rs12193574, rs2068147, rs3777440, rs3777441, rs3777442, rs3777455, rs3777461, rs3777466, rs3798249, rs3798250, rs3822863, rs4897471, rs9402299                                                                                                                                                                                                                                                                                   | T                            |
| rs4897473  | EPB41L2 | 6   | 131,256,964 | C            | T            | 0.349            | 1.000                  | intron                            | NA                             | rs13437326, rs1413755, rs17180687, rs17770255, rs17784418, rs17785507, rs2183967, rs2281487, rs28482889, rs3777434, rs3777435, rs3777436, rs4895901, rs4895903, rs4895907, rs4895908, rs4897468, rs4897484, rs4897485, rs6569707, rs6569708, rs6906478, rs6918160, rs6919007, rs6926250, rs6928920, rs6931804, rs6935108, rs6938552, rs7760965, rs7775013, rs872576, rs9385564, rs9388861, rs9388863, rs9402292, rs942, rs954211 | T                            |
| rs10499177 | EPB41L2 | 6   | 131,257,514 | A            | G            | 0.089            | 1.000                  | intron                            | NA                             | rs12527605, rs12528626, rs12529894, rs17059678, rs17059736, rs17059852, rs17832366, rs3777452, rs3798251, rs4513821, rs6941909, rs9492762                                                                                                                                                                                                                                                                                        | T                            |

**Supplemental Table 3: SNP Information**

| SNP        | Gene    | Chr | Position    | Major Allele | Minor Allele | MAF <sup>a</sup> | Call Rate <sup>b</sup> | Chromosomal Location <sup>c</sup> | Amino Acid Change <sup>d</sup> | LD Bin ( $r^2 > 0.80$ ) <sup>e</sup>                                                                                                                                                                                                                                                                                                                      | Analysis Sample <sup>f</sup> |
|------------|---------|-----|-------------|--------------|--------------|------------------|------------------------|-----------------------------------|--------------------------------|-----------------------------------------------------------------------------------------------------------------------------------------------------------------------------------------------------------------------------------------------------------------------------------------------------------------------------------------------------------|------------------------------|
| rs2068147  | EPB41L2 | 6   | 131,263,595 | C            | T            | 0.483            | 1.000                  | intron                            | NA                             | rs12193574, rs3777440, rs3777441, rs3777442, rs3777455, rs3777461, rs3777466, rs3798249, rs3798250, rs3822863, rs4897471, rs4897472, rs9402299                                                                                                                                                                                                            | T                            |
| rs3777450  | EPB41L2 | 6   | 131,269,439 | T            | C            | 0.024            | 1.000                  | intron                            | NA                             | rs1043598, rs10499174, rs12661081, rs12664355, rs12965, rs13193246, rs17059681, rs17059702, rs2236078, rs2275063, rs3777453, rs3777463, rs3822864, rs7747881, rs7769153                                                                                                                                                                                   | NA                           |
| rs1999474  | EPB41L2 | 6   | 131,279,395 | T            | C            | 0.276            | 1.000                  | intron                            | NA                             | rs1006655, rs1334689, rs1571911, rs2039509, rs2039830, rs2105250, rs2183969, rs4895898, rs4897475, rs6536, rs6569709, rs6907284, rs6938309, rs6938735, rs761835, rs7738572, rs7741462, rs7748468, rs7754351, rs7761655, rs7766505, rs7768048, rs9285468, rs9375777, rs9375786, rs9388867, rs9388870, rs9388871, rs9402304, rs9402305, rs9492764, rs998228 | T                            |
| rs12528626 | EPB41L2 | 6   | 131,291,090 | A            | G            | 0.088            | 1.000                  | intron                            | NA                             | rs10499177, rs12527605, rs12529894, rs17059678, rs17059736, rs17059852, rs17832366, rs3777452, rs3777464, rs3798251, rs4513821, rs6941909, rs9492762                                                                                                                                                                                                      | T                            |
| rs3777457  | EPB41L2 | 6   | 131,291,580 | G            | A            | 0.170            | 1.000                  | intron                            | NA                             | rs12110524, rs12206057, rs3777438, rs3777458, rs6938586, rs9321260, rs9492755                                                                                                                                                                                                                                                                             | T                            |
| rs7766004  | EPB41L2 | 6   | 131,295,666 | G            | A            | 0.273            | 1.000                  | intron                            | NA                             | NA                                                                                                                                                                                                                                                                                                                                                        | T                            |
| rs3822864  | EPB41L2 | 6   | 131,295,963 | G            | A            | 0.024            | 1.000                  | intron                            | NA                             | rs1043598, rs10499174, rs12661081, rs12664355, rs12965, rs13193246, rs17059681, rs17059702, rs2236078, rs2275063, rs3777450, rs3777453, rs3777463, rs7747881, rs7769153                                                                                                                                                                                   | NA                           |
| rs9321260  | EPB41L2 | 6   | 131,305,235 | A            | T            | 0.187            | 1.000                  | intron                            | NA                             | rs12206057, rs12526896, rs12530288, rs3777438, rs3777457, rs3777458, rs4357159, rs6938586, rs6941712, rs9492755                                                                                                                                                                                                                                           | T                            |
| rs3777463  | EPB41L2 | 6   | 131,307,487 | A            | G            | 0.024            | 1.000                  | intron                            | NA                             | rs1043598, rs10499174, rs12661081, rs12664355, rs12965, rs13193246, rs17059681, rs17059702, rs2236078, rs2275063, rs3777450, rs3777453, rs3822864, rs7747881, rs7769153                                                                                                                                                                                   | NA                           |
| rs3777464  | EPB41L2 | 6   | 131,308,450 | A            | G            | 0.102            | 1.000                  | intron                            | NA                             | rs12527605, rs12528626, rs12529894, rs17059852, rs3777452, rs6941909, rs9492762                                                                                                                                                                                                                                                                           | T                            |

**Supplemental Table 3: SNP Information**

| SNP        | Gene    | Chr | Position    | Major Allele | Minor Allele | MAF <sup>a</sup> | Call Rate <sup>b</sup> | Chromosomal Location <sup>c</sup> | Amino Acid Change <sup>d</sup> | LD Bin ( $r^2 > 0.80$ ) <sup>e</sup>                                                                                                                                                                                                                                                                                                                                            | Analysis Sample <sup>f</sup> |
|------------|---------|-----|-------------|--------------|--------------|------------------|------------------------|-----------------------------------|--------------------------------|---------------------------------------------------------------------------------------------------------------------------------------------------------------------------------------------------------------------------------------------------------------------------------------------------------------------------------------------------------------------------------|------------------------------|
| rs3777466  | EPB41L2 | 6   | 131,309,919 | A            | G            | 0.460            | 1.000                  | intron                            | NA                             | rs12193574, rs2068147, rs3777440, rs3777441, rs3777442, rs3777455, rs3777461, rs3798249, rs3798250, rs3822863, rs4897471, rs4897472, rs9402299                                                                                                                                                                                                                                  | T                            |
| rs9492767  | EPB41L2 | 6   | 131,314,703 | T            | C            | 0.191            | 0.998                  | intron                            | NA                             | rs12202038, rs2236075, rs2281490                                                                                                                                                                                                                                                                                                                                                | T                            |
| rs9375785  | EPB41L2 | 6   | 131,316,601 | C            | T            | 0.171            | 0.998                  | intron                            | NA                             | rs10457561, rs10457562, rs10457563, rs11760051, rs12195366, rs12196734, rs12197829, rs17059954, rs2151068, rs4498389, rs6905151, rs6907809, rs6916206, rs7770892, rs9372987, rs9372989, rs9375787, rs9375788, rs9375789, rs9375790, rs9375795, rs9375796, rs9375797, rs9388873, rs9388876, rs9398967, rs9398969, rs9402306, rs9402310, rs9483210, rs9492792, rs951251, rs954919 | T                            |
| rs2297853  | EPB41L2 | 6   | 131,318,638 | G            | T            | 0.352            | 0.995                  | intron                            | NA                             | rs1043596, rs12194612, rs1811949, rs2095961, rs6921396, rs6922045, rs6922177, rs7741148, rs7761311, rs7769678, rs915172, rs9321263, rs933063, rs9372985, rs9385568, rs9492774                                                                                                                                                                                                   | T                            |
| rs6941712  | EPB41L2 | 6   | 131,323,903 | T            | C            | 0.125            | 1.000                  | intron                            | NA                             | rs12526896, rs12530288, rs3777458, rs4357159, rs9321260, rs9492755                                                                                                                                                                                                                                                                                                              | T                            |
| rs2105250  | EPB41L2 | 6   | 131,325,875 | A            | T            | 0.274            | 0.998                  | intron                            | NA                             | rs1006655, rs1334689, rs1999474, rs2039509, rs4897475, rs6569709, rs6907284, rs6938309, rs7738572, rs7748468, rs7761655, rs7766505, rs9285468, rs9375777, rs9375786, rs9388867, rs9388870, rs9388871, rs9402304, rs9402305                                                                                                                                                      | T                            |
| rs2095961  | EPB41L2 | 6   | 131,325,953 | C            | T            | 0.355            | 1.000                  | intron                            | NA                             | rs1043596, rs12194612, rs1811949, rs2297853, rs6921396, rs6922045, rs6922177, rs7741148, rs7761311, rs7769678, rs867707, rs915172, rs9321263, rs933063, rs9372985, rs9385568, rs9492774                                                                                                                                                                                         | T                            |
| rs12527605 | EPB41L2 | 6   | 131,326,069 | C            | T            | 0.087            | 0.998                  | intron                            | NA                             | rs10499177, rs12528626, rs12529894, rs17059678, rs17059736, rs17059852, rs17832366, rs3777452, rs3777464, rs3798251, rs4513821, rs6941909, rs9492762                                                                                                                                                                                                                            | T                            |
| rs2070822  | FLNA    | X   | 153,232,642 | A            | G            | 0.256            | 0.964                  | intron                            | NA                             | rs5945185, rs17426, rs17428, rs2070816, rs2239470, rs4898478, rs4898479, rs5945423                                                                                                                                                                                                                                                                                              | NA                           |
| rs2070827  | FLNA    | X   | 153,235,897 | G            | A            | 0.088            | 0.971                  | intron                            | NA                             | rs2070819, rs2070829, rs2239469                                                                                                                                                                                                                                                                                                                                                 | NA                           |
| rs5945185  | FLNA    | X   | 153,244,670 | T            | G            | 0.236            | 0.962                  | intron                            | NA                             | rs2070822, rs17426, rs17428, rs2070816, rs2239470, rs4898478, rs4898479, rs5945423                                                                                                                                                                                                                                                                                              | NA                           |

**Supplemental Table 3: SNP Information**

| SNP        | Gene           | Chr | Position    | Major Allele | Minor Allele | MAF <sup>a</sup> | Call Rate <sup>b</sup> | Chromosomal Location <sup>c</sup> | Amino Acid Change <sup>d</sup> | LD Bin ( $r^2 > 0.80$ ) <sup>e</sup>                                                       | Analysis Sample <sup>f</sup> |
|------------|----------------|-----|-------------|--------------|--------------|------------------|------------------------|-----------------------------------|--------------------------------|--------------------------------------------------------------------------------------------|------------------------------|
| rs1064816  | FLNA           | X   | 153,248,322 | A            | G            | 0.249            | 0.962                  | coding                            | V320A<br>(NP_001447)           | NA                                                                                         | NA                           |
| rs17428    | FLNA           | X   | 153,263,157 | C            | T            | 0.223            | 0.978                  | flanking 3'UTR                    | NA                             | rs2070822, rs5945185, rs17426, rs2070816,<br>rs2239470, rs4898478, rs4898479,<br>rs5945423 | NA                           |
| rs10423854 | FOSB           | 19  | 50,647,512  | A            | G            | 0.425            | 0.998                  | flanking 5'UTR                    | NA                             | NA                                                                                         | T                            |
| rs10415949 | FOSB           | 19  | 50,654,639  | A            | G            | 0.242            | 1.000                  | flanking 5'UTR                    | NA                             | rs10402243                                                                                 | T                            |
| rs2238687  | FOSB           | 19  | 50,665,006  | G            | C            | 0.133            | 1.000                  | intron                            | NA                             | rs12373539, rs2238686                                                                      | T                            |
| rs2276469  | FOSB           | 19  | 50,666,433  | T            | C            | 0.449            | 0.916                  | intron                            | NA                             | rs2276470                                                                                  | T                            |
| rs708905   | FOSB           | 19  | 50,669,312  | G            | C            | 0.128            | 0.995                  | 3'UTR                             | NA                             | NA                                                                                         | T                            |
| rs6509214  | FOSB           | 19  | 50,673,655  | G            | T            | 0.339            | 0.998                  | flanking 3'UTR                    | NA                             | NA                                                                                         | T                            |
| rs4511641  | FOSB           | 19  | 50,685,408  | C            | A            | 0.440            | 1.000                  | intron                            | NA                             | NA                                                                                         | T                            |
| rs10988625 | FREQ<br>(NCS1) | 9   | 131,967,389 | G            | A            | 0.061            | 1.000                  | flanking 5'UTR                    | NA                             | NA                                                                                         | T                            |
| rs12378342 | FREQ<br>(NCS1) | 9   | 131,970,164 | T            | C            | 0.077            | 1.000                  | flanking 5'UTR                    | NA                             | rs12376641, rs41354949                                                                     | T                            |
| rs9802616  | FREQ<br>(NCS1) | 9   | 131,970,944 | T            | A            | 0.164            | 1.000                  | flanking 5'UTR                    | NA                             | NA                                                                                         | T                            |
| rs917690   | FREQ<br>(NCS1) | 9   | 131,974,002 | T            | G            | 0.105            | 0.945                  | flanking 5'UTR                    | NA                             | NA                                                                                         | G                            |
| rs3780708  | FREQ<br>(NCS1) | 9   | 131,975,772 | C            | T            | 0.356            | 0.988                  | intron                            | NA                             | NA                                                                                         | G                            |
| rs1017112  | FREQ<br>(NCS1) | 9   | 131,976,625 | T            | C            | 0.172            | 0.998                  | intron                            | NA                             | rs3780712, rs4837479                                                                       | T                            |
| rs4837479  | FREQ<br>(NCS1) | 9   | 131,979,828 | C            | T            | 0.151            | 1.000                  | intron                            | NA                             | rs1017112, rs3780712                                                                       | T                            |
| rs3780711  | FREQ<br>(NCS1) | 9   | 131,982,864 | T            | C            | 0.122            | 0.964                  | intron                            | NA                             | NA                                                                                         | G                            |
| rs7849345  | FREQ<br>(NCS1) | 9   | 131,984,366 | C            | T            | 0.490            | 0.993                  | intron                            | NA                             | NA                                                                                         | T                            |
| rs10819610 | FREQ<br>(NCS1) | 9   | 131,986,436 | G            | T            | 0.283            | 1.000                  | intron                            | NA                             | rs7862394, rs4424362                                                                       | T                            |
| rs3824544  | FREQ<br>(NCS1) | 9   | 131,988,371 | C            | T            | 0.247            | 0.986                  | intron                            | NA                             | NA                                                                                         | T                            |
| rs7862394  | FREQ<br>(NCS1) | 9   | 131,989,685 | A            | G            | 0.315            | 1.000                  | intron                            | NA                             | rs10819610, rs4424362                                                                      | T                            |
| rs10819611 | FREQ<br>(NCS1) | 9   | 131,995,274 | T            | C            | 0.299            | 1.000                  | intron                            | NA                             | rs13288372                                                                                 | T                            |
| rs1009502  | FREQ<br>(NCS1) | 9   | 131,996,050 | G            | A            | 0.317            | 0.962                  | intron                            | NA                             | rs12003792                                                                                 | T                            |
| rs1342043  | FREQ<br>(NCS1) | 9   | 131,998,126 | T            | C            | 0.143            | 0.988                  | intron                            | NA                             | rs4240446, rs7022964, rs7037293, rs887534                                                  | T                            |
| rs7856531  | FREQ<br>(NCS1) | 9   | 132,000,447 | T            | G            | 0.462            | 1.000                  | intron                            | NA                             | rs3780715, rs7023210, rs7024495,<br>rs7045735, rs7847466, rs870811, rs885345               | T                            |
| rs7037293  | FREQ<br>(NCS1) | 9   | 132,002,538 | G            | A            | 0.134            | 0.986                  | intron                            | NA                             | rs1342043, rs4240446, rs7022964, rs887534                                                  | T                            |

**Supplemental Table 3: SNP Information**

| SNP        | Gene        | Chr | Position    | Major Allele | Minor Allele | MAF <sup>a</sup> | Call Rate <sup>b</sup> | Chromosomal Location <sup>c</sup> | Amino Acid Change <sup>d</sup> | LD Bin ( $r^2 > 0.80$ ) <sup>e</sup>                                      | Analysis Sample <sup>f</sup> |
|------------|-------------|-----|-------------|--------------|--------------|------------------|------------------------|-----------------------------------|--------------------------------|---------------------------------------------------------------------------|------------------------------|
| rs7045735  | FREQ (NCS1) | 9   | 132,004,454 | A            | G            | 0.402            | 0.969                  | intron                            | NA                             | rs3780715, rs7023210, rs7024495, rs7847466, rs7856531, rs870811, rs885345 | G                            |
| rs7024495  | FREQ (NCS1) | 9   | 132,007,017 | G            | A            | 0.481            | 0.998                  | intron                            | NA                             | rs3780715, rs7023210, rs7045735, rs7847466, rs7856531, rs870811, rs885345 | T                            |
| rs7023210  | FREQ (NCS1) | 9   | 132,011,977 | T            | C            | 0.477            | 0.998                  | intron                            | NA                             | rs3780715, rs7024495, rs7045735, rs7847466, rs7856531, rs870811, rs885345 | T                            |
| rs947513   | FREQ (NCS1) | 9   | 132,013,809 | A            | G            | 0.447            | 1.000                  | intron                            | NA                             | rs6478953, rs7875376                                                      | T                            |
| rs10819615 | FREQ (NCS1) | 9   | 132,014,745 | C            | T            | 0.361            | 0.995                  | intron                            | NA                             | NA                                                                        | T                            |
| rs3897499  | FREQ (NCS1) | 9   | 132,014,885 | A            | T            | 0.355            | 0.986                  | intron                            | NA                             | NA                                                                        | T                            |
| rs4240446  | FREQ (NCS1) | 9   | 132,018,220 | G            | A            | 0.143            | 0.945                  | intron                            | NA                             | rs1342043, rs7022964, rs7037293, rs887534                                 | T                            |
| rs10988645 | FREQ (NCS1) | 9   | 132,019,357 | G            | A            | 0.295            | 1.000                  | intron                            | NA                             | rs12346070, rs4240447, rs4836695, rs4836697                               | T                            |
| rs3829905  | FREQ (NCS1) | 9   | 132,024,932 | C            | T            | 0.348            | 0.851                  | intron                            | NA                             | rs10988648                                                                | T                            |
| rs2277200  | FREQ (NCS1) | 9   | 132,028,530 | T            | G            | 0.313            | 1.000                  | coding                            | G172G (NP_055101)              | rs2900286                                                                 | T                            |
| rs2900286  | FREQ (NCS1) | 9   | 132,030,234 | G            | C            | 0.311            | 1.000                  | intron                            | NA                             | rs2277200                                                                 | T                            |
| rs7873936  | FREQ (NCS1) | 9   | 132,032,983 | G            | A            | 0.182            | 1.000                  | intron                            | NA                             | NA                                                                        | T                            |
| rs7852859  | FREQ (NCS1) | 9   | 132,034,981 | A            | G            | 0.125            | 1.000                  | intron                            | NA                             | NA                                                                        | T                            |
| rs1054879  | FREQ (NCS1) | 9   | 132,035,589 | A            | G            | 0.463            | 1.000                  | 3'UTR                             | NA                             | NA                                                                        | T                            |
| rs13710    | FREQ (NCS1) | 9   | 132,037,596 | T            | C            | 0.290            | 1.000                  | 3'UTR                             | NA                             | rs709611                                                                  | T                            |
| rs709611   | FREQ (NCS1) | 9   | 132,038,180 | C            | T            | 0.277            | 0.995                  | 3'UTR                             | NA                             | rs13710                                                                   | T                            |
| rs7867364  | FREQ (NCS1) | 9   | 132,040,103 | C            | T            | 0.166            | 0.998                  | flanking 3'UTR                    | NA                             | NA                                                                        | T                            |
| rs7863731  | FREQ (NCS1) | 9   | 132,042,626 | C            | T            | 0.389            | 0.981                  | flanking 3'UTR                    | NA                             | NA                                                                        | T                            |
| rs1557123  | FREQ (NCS1) | 9   | 132,042,979 | C            | G            | 0.083            | 0.998                  | flanking 3'UTR                    | NA                             | NA                                                                        | T                            |
| rs7867693  | FREQ (NCS1) | 9   | 132,043,625 | G            | A            | 0.114            | 1.000                  | flanking 3'UTR                    | NA                             | rs10819621                                                                | T                            |
| rs7868148  | FREQ (NCS1) | 9   | 132,043,755 | G            | A            | 0.273            | 1.000                  | flanking 3'UTR                    | NA                             | NA                                                                        | T                            |
| rs10819621 | FREQ (NCS1) | 9   | 132,045,353 | T            | C            | 0.143            | 0.998                  | flanking 3'UTR                    | NA                             | rs7867693                                                                 | T                            |
| rs10988653 | FREQ (NCS1) | 9   | 132,046,295 | T            | C            | 0.376            | 0.998                  | flanking 3'UTR                    | NA                             | NA                                                                        | T                            |
| rs965808   | GNAS        | 20  | 56,841,821  | A            | C            | 0.244            | 0.998                  | flanking 5'UTR                    | NA                             | NA                                                                        | T                            |

**Supplemental Table 3: SNP Information**

| SNP        | Gene | Chr | Position   | Major Allele | Minor Allele | MAF <sup>a</sup> | Call Rate <sup>b</sup> | Chromosomal Location <sup>c</sup> | Amino Acid Change <sup>d</sup> | LD Bin ( $r^2 > 0.80$ ) <sup>e</sup>         | Analysis Sample <sup>f</sup> |
|------------|------|-----|------------|--------------|--------------|------------------|------------------------|-----------------------------------|--------------------------------|----------------------------------------------|------------------------------|
| rs3761264  | GNAS | 20  | 56,846,766 | C            | T            | 0.432            | 1.000                  | flanking 5'UTR                    | NA                             | rs4810147, rs4812040                         | T                            |
| rs6064714  | GNAS | 20  | 56,847,535 | A            | G            | 0.146            | 1.000                  | flanking 5'UTR                    | NA                             | NA                                           | T                            |
| rs1800900  | GNAS | 20  | 56,848,505 | G            | A            | 0.393            | 0.952                  | 5'UTR                             | NA                             | rs1800905, rs3761263, rs6026557, rs6123832   | G                            |
| rs4810147  | GNAS | 20  | 56,855,022 | G            | A            | 0.457            | 1.000                  | flanking 3'UTR                    | NA                             | rs3761264, rs4812040, rs6123833              | T                            |
| rs6015389  | GNAS | 20  | 56,860,121 | T            | C            | 0.361            | 0.986                  | flanking 5'UTR                    | NA                             | rs6026561                                    | T                            |
| rs6026561  | GNAS | 20  | 56,860,527 | T            | C            | 0.359            | 0.995                  | flanking 5'UTR                    | NA                             | rs6015389                                    | T                            |
| rs8125112  | GNAS | 20  | 56,864,560 | T            | C            | 0.160            | 0.962                  | flanking 3'UTR                    | NA                             | NA                                           | T                            |
| rs6064716  | GNAS | 20  | 56,877,541 | G            | C            | 0.132            | 1.000                  | flanking 3'UTR                    | NA                             | rs11699704, rs6070638                        | T                            |
| rs2145288  | GNAS | 20  | 56,877,604 | A            | C            | 0.277            | 1.000                  | flanking 3'UTR                    | NA                             | NA                                           | T                            |
| rs6026567  | GNAS | 20  | 56,878,310 | A            | G            | 0.412            | 1.000                  | flanking 3'UTR                    | NA                             | rs12625436                                   | T                            |
| rs12625436 | GNAS | 20  | 56,878,608 | G            | A            | 0.390            | 1.000                  | flanking 3'UTR                    | NA                             | rs6026567                                    | T                            |
| rs7271854  | GNAS | 20  | 56,880,417 | C            | T            | 0.409            | 0.986                  | flanking 3'UTR                    | NA                             | NA                                           | T                            |
| rs4810148  | GNAS | 20  | 56,881,306 | T            | C            | 0.343            | 1.000                  | flanking 3'UTR                    | NA                             | rs6123836                                    | T                            |
| rs2180696  | GNAS | 20  | 56,887,299 | C            | G            | 0.403            | 1.000                  | flanking 5'UTR                    | NA                             | NA                                           | T                            |
| rs6026574  | GNAS | 20  | 56,889,890 | A            | T            | 0.372            | 1.000                  | flanking 5'UTR                    | NA                             | rs4812042                                    | T                            |
| rs4812042  | GNAS | 20  | 56,895,310 | A            | G            | 0.412            | 1.000                  | flanking 5'UTR                    | NA                             | rs2057291, rs6026574, rs6026584              | T                            |
| rs6092704  | GNAS | 20  | 56,901,873 | A            | C            | 0.102            | 1.000                  | flanking 3'UTR                    | NA                             | rs3730164                                    | T                            |
| rs2057291  | GNAS | 20  | 56,905,438 | G            | A            | 0.368            | 1.000                  | intron                            | NA                             | rs4812042, rs6026584, rs8121252              | T                            |
| rs6128461  | GNAS | 20  | 56,910,485 | C            | T            | 0.392            | 1.000                  | intron                            | NA                             | rs6026592                                    | T                            |
| rs7121     | GNAS | 20  | 56,912,202 | C            | T            | 0.495            | 1.000                  | coding                            | I117I<br>(NP_536351)           | NA                                           | T                            |
| rs3730168  | GNAS | 20  | 56,912,334 | G            | A            | 0.336            | 1.000                  | intron                            | NA                             | NA                                           | T                            |
| rs6026593  | GNAS | 20  | 56,912,528 | A            | G            | 0.113            | 1.000                  | intron                            | NA                             | rs6100269                                    | T                            |
| rs919197   | GNAS | 20  | 56,914,328 | C            | T            | 0.459            | 1.000                  | intron                            | NA                             | rs234628, rs234629, rs3787493                | T                            |
| rs3787493  | GNAS | 20  | 56,914,543 | G            | A            | 0.459            | 1.000                  | intron                            | NA                             | rs234628, rs234629, rs919197                 | T                            |
| rs234630   | GNAS | 20  | 56,917,050 | T            | C            | 0.300            | 0.998                  | intron                            | NA                             | rs151331, rs234618, rs234627                 | T                            |
| rs234628   | GNAS | 20  | 56,919,006 | C            | T            | 0.430            | 1.000                  | intron                            | NA                             | rs234629, rs3787493, rs919197                | T                            |
| rs234627   | GNAS | 20  | 56,920,375 | C            | T            | 0.284            | 1.000                  | flanking 3'UTR                    | NA                             | rs151331, rs234618, rs234630                 | T                            |
| rs234623   | GNAS | 20  | 56,922,359 | A            | G            | 0.483            | 1.000                  | flanking 3'UTR                    | NA                             | NA                                           | T                            |
| rs234621   | GNAS | 20  | 56,923,643 | C            | A            | 0.295            | 1.000                  | flanking 3'UTR                    | NA                             | rs151331, rs234618                           | T                            |
| rs151331   | GNAS | 20  | 56,925,899 | G            | A            | 0.299            | 1.000                  | flanking 3'UTR                    | NA                             | rs234618, rs234621, rs234627, rs234630       | T                            |
| rs9612225  | GNAZ | 22  | 21,736,619 | G            | A            | 0.246            | 0.995                  | flanking 5'UTR                    | NA                             | rs13054331, rs13054904, rs9608071            | T                            |
| rs13054331 | GNAZ | 22  | 21,737,063 | G            | A            | 0.242            | 1.000                  | flanking 5'UTR                    | NA                             | rs13054904, rs13055979, rs9608071, rs9612225 | T                            |
| rs9624019  | GNAZ | 22  | 21,737,301 | A            | C            | 0.102            | 0.998                  | flanking 5'UTR                    | NA                             | NA                                           | T                            |
| rs3788337  | GNAZ | 22  | 21,742,017 | G            | A            | 0.351            | 0.995                  | flanking 5'UTR                    | NA                             | NA                                           | T                            |
| rs3788339  | GNAZ | 22  | 21,747,677 | A            | G            | 0.127            | 1.000                  | intron                            | NA                             | NA                                           | T                            |

**Supplemental Table 3: SNP Information**

| SNP       | Gene | Chr | Position   | Major Allele | Minor Allele | MAF <sup>a</sup> | Call Rate <sup>b</sup> | Chromosomal Location <sup>c</sup> | Amino Acid Change <sup>d</sup> | LD Bin ( $r^2 > 0.80$ ) <sup>e</sup>                                                                                                                                                                                                 | Analysis Sample <sup>f</sup> |
|-----------|------|-----|------------|--------------|--------------|------------------|------------------------|-----------------------------------|--------------------------------|--------------------------------------------------------------------------------------------------------------------------------------------------------------------------------------------------------------------------------------|------------------------------|
| rs3788341 | GNAZ | 22  | 21,747,758 | A            | G            | 0.472            | 0.995                  | intron                            | NA                             | NA                                                                                                                                                                                                                                   | T                            |
| rs9306383 | GNAZ | 22  | 21,751,058 | A            | C            | 0.431            | 0.995                  | intron                            | NA                             | NA                                                                                                                                                                                                                                   | T                            |
| rs3827315 | GNAZ | 22  | 21,752,890 | T            | C            | 0.288            | 0.998                  | intron                            | NA                             | rs1805058, rs1858746, rs1989777, rs2266995, rs2266997, rs2266999, rs2283802, rs2330336, rs2330338, rs3788343, rs3810614, rs4820536, rs4822354, rs5751576, rs5751578, rs5751579, rs5759580, rs6003502, rs6519411, rs739362, rs874138  | T                            |
| rs5751579 | GNAZ | 22  | 21,759,224 | C            | T            | 0.275            | 1.000                  | intron                            | NA                             | rs3827315, rs1805058, rs1858746, rs1989777, rs2266995, rs2266997, rs2266999, rs2283802, rs2330336, rs2330338, rs3788343, rs3810614, rs4820536, rs4822354, rs5751576, rs5751578, rs5759580, rs6003502, rs6519411, rs739362, rs874138  | T                            |
| rs1858746 | GNAZ | 22  | 21,763,804 | T            | C            | 0.279            | 0.978                  | intron                            | NA                             | rs3827315, rs1805058, rs1989777, rs2266995, rs2266997, rs2266999, rs2283802, rs2330336, rs2330338, rs3788343, rs3810614, rs4820536, rs4822354, rs5751576, rs5751578, rs5751579, rs5759580, rs6003502, rs6519411, rs739362, rs874138  | G                            |
| rs5751583 | GNAZ | 22  | 21,764,327 | G            | A            | 0.058            | 0.998                  | intron                            | NA                             | NA                                                                                                                                                                                                                                   | T                            |
| rs3810614 | GNAZ | 22  | 21,767,271 | G            | A            | 0.289            | 0.976                  | intron                            | NA                             | rs3827315, rs1805058, rs1858746, rs1989777, rs2266995, rs2266997, rs2266999, rs2283802, rs2330336, rs2330338, rs3788343, rs4820536, rs4822354, rs5751576, rs5751578, rs5751579, rs5759580, rs6003502, rs6519411, rs739362, rs874138  | G                            |
| rs739362  | GNAZ | 22  | 21,774,067 | G            | C            | 0.279            | 0.950                  | intron                            | NA                             | rs3827315, rs1805058, rs1858746, rs1989777, rs2266995, rs2266997, rs2266999, rs2283802, rs2330336, rs2330338, rs3788343, rs3810614, rs4820536, rs4822354, rs5751576, rs5751578, rs5751579, rs5759580, rs6003502, rs6519411, rs874138 | G                            |
| rs2266999 | GNAZ | 22  | 21,781,775 | G            | C            | 0.275            | 0.998                  | intron                            | NA                             | rs3827315, rs1805058, rs1858746, rs1989777, rs2266995, rs2266997, rs2283802, rs2330336, rs2330338, rs3788343, rs3810614, rs4820536, rs4822354, rs5751576, rs5751578, rs5751579, rs5759580, rs6003502, rs6519411, rs739362, rs874138  | T                            |



**Supplemental Table 3: SNP Information**

| SNP        | Gene | Chr | Position   | Major Allele | Minor Allele | MAF <sup>a</sup> | Call Rate <sup>b</sup> | Chromosomal Location <sup>c</sup> | Amino Acid Change <sup>d</sup> | LD Bin ( $r^2 > 0.80$ ) <sup>e</sup>                                                                                                                                                                                                          | Analysis Sample <sup>f</sup> |
|------------|------|-----|------------|--------------|--------------|------------------|------------------------|-----------------------------------|--------------------------------|-----------------------------------------------------------------------------------------------------------------------------------------------------------------------------------------------------------------------------------------------|------------------------------|
| rs2283802  | GNAZ | 22  | 21,784,722 | C            | T            | 0.263            | 0.993                  | intron                            | NA                             | rs3827315, rs1805058, rs1858746, rs1989777, rs2266995, rs2266997, rs2266999, rs2330336, rs2330338, rs3788343, rs3810614, rs4820536, rs4822354, rs5751576, rs5751578, rs5751579, rs5759580, rs6003502, rs6519411, rs739362, rs874138           | T                            |
| rs13054985 | GNAZ | 22  | 21,788,577 | A            | G            | 0.453            | 1.000                  | intron                            | NA                             | rs1051875, rs2157710, rs2267000, rs2267003, rs2267004, rs2283803, rs3788347, rs3788348, rs3788350, rs3788351, rs4822357, rs4822359, rs5751589, rs6003518, rs756631, rs885963, rs885964, rs916583, rs916585, rs9612234, rs9612237              | T                            |
| rs885964   | GNAZ | 22  | 21,791,003 | C            | G            | 0.446            | 0.995                  | intron                            | NA                             | rs1051875, rs13054985, rs2157710, rs2267000, rs2267003, rs2267004, rs2283803, rs3788347, rs3788348, rs3788350, rs3788351, rs4822357, rs4822359, rs5751589, rs5759593, rs6003518, rs756631, rs885963, rs916583, rs916585, rs9612234, rs9612237 | T                            |
| rs5759593  | GNAZ | 22  | 21,794,457 | G            | A            | 0.408            | 0.995                  | intron                            | NA                             | rs1051875, rs2157710, rs2267000, rs2267003, rs2267004, rs2283803, rs3788347, rs3788348, rs3788350, rs3788351, rs4822357, rs4822359, rs5751589, rs6003518, rs756631, rs885963, rs885964, rs916583, rs916585, rs9612234, rs9612237              | T                            |
| rs4820537  | GNAZ | 22  | 21,794,810 | G            | A            | 0.471            | 0.990                  | intron                            | NA                             | NA                                                                                                                                                                                                                                            | T                            |
| rs9612234  | GNAZ | 22  | 21,797,080 | T            | C            | 0.444            | 1.000                  | 3'UTR                             | NA                             | rs1051875, rs13054985, rs2157710, rs2267000, rs2267003, rs2267004, rs2283803, rs3788347, rs3788348, rs3788350, rs3788351, rs4822357, rs4822359, rs5751589, rs5759593, rs6003518, rs756631, rs885963, rs885964, rs916583, rs916585, rs9612237  | T                            |
| rs756632   | GNAZ | 22  | 21,799,918 | C            | T            | 0.148            | 0.995                  | flanking 3'UTR                    | NA                             | NA                                                                                                                                                                                                                                            | T                            |
| rs9612237  | GNAZ | 22  | 21,802,954 | C            | T            | 0.438            | 0.998                  | flanking 3'UTR                    | NA                             | rs1051875, rs13054985, rs2157710, rs2267000, rs2267003, rs2267004, rs2283803, rs3788347, rs3788348, rs3788350, rs3788351, rs4822357, rs4822359, rs5751589, rs5759593, rs6003518, rs756631, rs885963, rs885964, rs916583, rs916585, rs9612234  | T                            |
| rs9909443  | GRB2 | 17  | 70,819,941 | C            | T            | 0.261            | 0.998                  | flanking 3'UTR                    | NA                             | rs12936583, rs4542691, rs4559942, rs7207618, rs7219, rs8079197                                                                                                                                                                                | T                            |
| rs4559942  | GRB2 | 17  | 70,820,864 | A            | G            | 0.269            | 1.000                  | flanking 3'UTR                    | NA                             | rs12936583, rs12946365, rs4542691, rs7207618, rs7219, rs8079197, rs9909443                                                                                                                                                                    | T                            |

**Supplemental Table 3: SNP Information**

| SNP        | Gene | Chr | Position   | Major Allele | Minor Allele | MAF <sup>a</sup> | Call Rate <sup>b</sup> | Chromosomal Location <sup>c</sup> | Amino Acid Change <sup>d</sup> | LD Bin ( $r^2 > 0.80$ ) <sup>e</sup>                                                                                                                                                                                                  | Analysis Sample <sup>f</sup> |
|------------|------|-----|------------|--------------|--------------|------------------|------------------------|-----------------------------------|--------------------------------|---------------------------------------------------------------------------------------------------------------------------------------------------------------------------------------------------------------------------------------|------------------------------|
| rs6501775  | GRB2 | 17  | 70,822,168 | C            | T            | 0.053            | 0.998                  | flanking 3'UTR                    | NA                             | NA                                                                                                                                                                                                                                    | T                            |
| rs8081778  | GRB2 | 17  | 70,823,867 | C            | T            | 0.194            | 1.000                  | flanking 3'UTR                    | NA                             | rs1108355, rs12945469, rs2033607, rs2053156, rs2053158, rs2117562, rs2117563, rs2385264, rs2891713, rs4788889, rs4788890, rs4788891, rs4789181, rs4789186, rs4789188, rs4789189, rs4789193, rs6501786, rs7207506, rs959260, rs9901434 | T                            |
| rs7219     | GRB2 | 17  | 70,826,963 | T            | C            | 0.273            | 1.000                  | 3'UTR                             | NA                             | rs12936583, rs12946365, rs4542691, rs4559942, rs7207618, rs8079197, rs9909443                                                                                                                                                         | T                            |
| rs8079197  | GRB2 | 17  | 70,828,274 | C            | G            | 0.273            | 0.998                  | intron                            | NA                             | rs1076094, rs11077787, rs1109033, rs12936583, rs12946365, rs2053159, rs2164243, rs2891714, rs4542691, rs4559942, rs4789170, rs7207618, rs7219, rs9900586, rs9909443, rs9912608                                                        | T                            |
| rs12946365 | GRB2 | 17  | 70,829,239 | T            | C            | 0.272            | 1.000                  | intron                            | NA                             | rs12936583, rs4542691, rs4559942, rs7207618, rs7219, rs8079197                                                                                                                                                                        | T                            |
| rs12600908 | GRB2 | 17  | 70,839,969 | G            | A            | 0.124            | 1.000                  | flanking 3'UTR                    | NA                             | rs16967789, rs9897815                                                                                                                                                                                                                 | T                            |
| rs4789170  | GRB2 | 17  | 70,844,389 | C            | T            | 0.264            | 1.000                  | intron                            | NA                             | rs1076094, rs11077787, rs1109033, rs12950752, rs2053159, rs2164243, rs2891714, rs4542691, rs4624215, rs7207618, rs8079197, rs9900586, rs9912608                                                                                       | T                            |
| rs9912608  | GRB2 | 17  | 70,848,626 | C            | G            | 0.263            | 0.998                  | intron                            | NA                             | rs1076094, rs11077787, rs1109033, rs12950752, rs2053159, rs2164243, rs2891714, rs4542691, rs4624215, rs4789170, rs7207618, rs8079197, rs9900586                                                                                       | T                            |
| rs4789172  | GRB2 | 17  | 70,853,307 | C            | T            | 0.492            | 0.998                  | intron                            | NA                             | NA                                                                                                                                                                                                                                    | T                            |
| rs1369299  | GRB2 | 17  | 70,858,920 | C            | T            | 0.187            | 1.000                  | intron                            | NA                             | rs4789173, rs4789176, rs8065441, rs930296, rs930297, rs9302989, rs9302990, rs9899687, rs9914731                                                                                                                                       | T                            |
| rs4789176  | GRB2 | 17  | 70,864,463 | T            | A            | 0.188            | 1.000                  | intron                            | NA                             | rs1369299, rs4789173, rs8065441, rs930296, rs930297, rs9302989, rs9302990, rs9899687, rs9914731                                                                                                                                       | T                            |
| rs4350602  | GRB2 | 17  | 70,867,364 | T            | C            | 0.309            | 1.000                  | intron                            | NA                             | rs4789182                                                                                                                                                                                                                             | T                            |
| rs9902966  | GRB2 | 17  | 70,873,742 | T            | C            | 0.195            | 0.995                  | intron                            | NA                             | NA                                                                                                                                                                                                                                    | T                            |
| rs4789178  | GRB2 | 17  | 70,879,837 | G            | C            | 0.197            | 0.998                  | intron                            | NA                             | NA                                                                                                                                                                                                                                    | T                            |
| rs4789182  | GRB2 | 17  | 70,886,540 | A            | G            | 0.319            | 0.998                  | intron                            | NA                             | rs4350602                                                                                                                                                                                                                             | T                            |

**Supplemental Table 3: SNP Information**

| SNP        | Gene   | Chr | Position   | Major Allele | Minor Allele | MAF <sup>a</sup> | Call Rate <sup>b</sup> | Chromosomal Location <sup>c</sup> | Amino Acid Change <sup>d</sup> | LD Bin ( $r^2 > 0.80$ ) <sup>e</sup>                                                                                                                                                                                                             | Analysis Sample <sup>f</sup> |
|------------|--------|-----|------------|--------------|--------------|------------------|------------------------|-----------------------------------|--------------------------------|--------------------------------------------------------------------------------------------------------------------------------------------------------------------------------------------------------------------------------------------------|------------------------------|
| rs2053156  | GRB2   | 17  | 70,890,035 | T            | G            | 0.197            | 1.000                  | intron                            | NA                             | rs1108355, rs12945469, rs2033607, rs2053158, rs2117562, rs2117563, rs2385264, rs2891713, rs4788889, rs4788890, rs4788891, rs4789181, rs4789186, rs4789188, rs4789189, rs4789193, rs6501786, rs7207506, rs8081778, rs959260, rs9901434            | T                            |
| rs9909076  | GRB2   | 17  | 70,896,404 | T            | G            | 0.197            | 1.000                  | intron                            | NA                             | NA                                                                                                                                                                                                                                               | T                            |
| rs4788891  | GRB2   | 17  | 70,902,740 | G            | A            | 0.194            | 1.000                  | intron                            | NA                             | rs1108355, rs12945469, rs2033607, rs2053156, rs2053158, rs2117562, rs2117563, rs2385264, rs2891713, rs4788889, rs4788890, rs4789181, rs4789186, rs4789188, rs4789189, rs4789193, rs6501786, rs7207506, rs8081778, rs959260, rs9901434            | T                            |
| rs4789189  | GRB2   | 17  | 70,909,580 | G            | C            | 0.199            | 0.995                  | intron                            | NA                             | rs1108355, rs12945469, rs2033607, rs2053156, rs2053158, rs2117562, rs2117563, rs2385264, rs2891713, rs4788889, rs4788890, rs4788891, rs4789181, rs4789186, rs4789188, rs4789189, rs4789193, rs6501786, rs7207506, rs8081778, rs959260, rs9901434 | T                            |
| rs9908820  | GRB2   | 17  | 70,920,414 | G            | A            | 0.341            | 1.000                  | flanking 5'UTR                    | NA                             | NA                                                                                                                                                                                                                                               | T                            |
| rs8065441  | GRB2   | 17  | 70,922,042 | G            | C            | 0.147            | 0.998                  | flanking 5'UTR                    | NA                             | rs1369299, rs4789173, rs4789176, rs930296, rs930297, rs9302989, rs9302990, rs9899687, rs9914731                                                                                                                                                  | T                            |
| rs10914453 | HCRTR1 | 1   | 31,847,623 | G            | A            | 0.404            | 1.000                  | flanking 5'UTR                    | NA                             | rs10798880, rs10914456, rs10914458, rs2271933, rs2280386, rs6663012, rs6664789, rs7524405, rs7529064, rs7546297, rs871634                                                                                                                        | T                            |
| rs3753612  | HCRTR1 | 1   | 31,854,997 | G            | C            | 0.475            | 0.954                  | flanking 5'UTR                    | NA                             | rs10914456, rs2176807, rs2271933, rs3753613, rs4949454, rs6663012, rs6681414, rs6703093, rs7529064, rs968335                                                                                                                                     | G                            |
| rs968335   | HCRTR1 | 1   | 31,858,363 | A            | G            | 0.484            | 1.000                  | intron                            | NA                             | rs10914456, rs2176807, rs2271933, rs3753612, rs3753613, rs4949454, rs6663012, rs6681414, rs6703093, rs7529064                                                                                                                                    | T                            |
| rs10914456 | HCRTR1 | 1   | 31,860,758 | C            | T            | 0.452            | 0.923                  | intron                            | NA                             | rs10798880, rs10914453, rs10914458, rs2176807, rs2271933, rs2280386, rs3753612, rs3753613, rs4949454, rs6663012, rs6664789, rs6703093, rs7524405, rs7529064, rs7546297, rs871634, rs968335                                                       | G                            |
| rs7516785  | HCRTR1 | 1   | 31,861,808 | G            | NA           | 0.000            | 0.998                  | coding                            | R279Q<br>(NP_001516)           | NA                                                                                                                                                                                                                                               | NA                           |

**Supplemental Table 3: SNP Information**

| SNP        | Gene   | Chr | Position   | Major Allele | Minor Allele | MAF <sup>a</sup> | Call Rate <sup>b</sup> | Chromosomal Location <sup>c</sup> | Amino Acid Change <sup>d</sup> | LD Bin ( $r^2 > 0.80$ ) <sup>e</sup>                                                                                                                                                        | Analysis Sample <sup>f</sup> |
|------------|--------|-----|------------|--------------|--------------|------------------|------------------------|-----------------------------------|--------------------------------|---------------------------------------------------------------------------------------------------------------------------------------------------------------------------------------------|------------------------------|
| rs2271933  | HCRTR1 | 1   | 31,865,112 | G            | A            | 0.426            | 0.993                  | coding                            | I408V (NP_001516)              | rs10798880, rs10914453, rs10914456, rs10914458, rs2176807, rs2280386, rs3753612, rs3753613, rs4949454, rs6663012, rs6664789, rs6703093, rs7524405, rs7529064, rs7546297, rs871634, rs968335 | T                            |
| rs6703093  | HCRTR1 | 1   | 31,866,148 | T            | C            | 0.486            | 1.000                  | flanking 3'UTR                    | NA                             | rs10914456, rs2176807, rs2271933, rs3753612, rs3753613, rs4949454, rs6681414, rs7529064, rs968335                                                                                           | T                            |
| rs10914457 | HCRTR1 | 1   | 31,866,848 | C            | A            | 0.405            | 0.957                  | flanking 3'UTR                    | NA                             | NA                                                                                                                                                                                          | G                            |
| rs10798880 | HCRTR1 | 1   | 31,869,675 | T            | G            | 0.412            | 1.000                  | intron                            | NA                             | rs10914453, rs10914456, rs10914458, rs2271933, rs2280386, rs6663012, rs6664789, rs7524405, rs7529064, rs7546297, rs871634                                                                   | T                            |
| rs7546297  | HCRTR1 | 1   | 31,879,081 | G            | A            | 0.405            | 1.000                  | intron                            | NA                             | rs10798880, rs10914453, rs10914456, rs10914458, rs2271933, rs2280386, rs6663012, rs6664789, rs7524405, rs7529064, rs871634                                                                  | T                            |
| rs7524405  | HCRTR1 | 1   | 31,881,166 | A            | C            | 0.410            | 0.998                  | intron                            | NA                             | rs10798880, rs10914453, rs10914456, rs10914458, rs2271933, rs2280386, rs6663012, rs6664789, rs7529064, rs7546297, rs871634                                                                  | T                            |
| rs9396056  | HCRTR2 | 6   | 55,141,716 | C            | T            | 0.392            | 1.000                  | flanking 5'UTR                    | NA                             | NA                                                                                                                                                                                          | T                            |
| rs9357845  | HCRTR2 | 6   | 55,142,145 | G            | C            | 0.387            | 1.000                  | flanking 5'UTR                    | NA                             | rs4431422, rs7756097, rs7767642, rs7771743                                                                                                                                                  | T                            |
| rs9464203  | HCRTR2 | 6   | 55,145,083 | G            | A            | 0.213            | 1.000                  | flanking 5'UTR                    | NA                             | rs11751491, rs13198993, rs13200042, rs3122154, rs3122163, rs3134704, rs3134707, rs4609033, rs9370403                                                                                        | T                            |
| rs9382460  | HCRTR2 | 6   | 55,145,443 | C            | A            | 0.187            | 1.000                  | flanking 5'UTR                    | NA                             | rs4467775                                                                                                                                                                                   | T                            |
| rs9367621  | HCRTR2 | 6   | 55,148,249 | A            | T            | 0.448            | 0.998                  | intron                            | NA                             | rs7738215                                                                                                                                                                                   | T                            |
| rs10456181 | HCRTR2 | 6   | 55,148,655 | G            | A            | 0.351            | 1.000                  | intron                            | NA                             | rs10456182                                                                                                                                                                                  | T                            |
| rs4364482  | HCRTR2 | 6   | 55,148,947 | G            | A            | 0.185            | 1.000                  | intron                            | NA                             | NA                                                                                                                                                                                          | T                            |
| rs6927478  | HCRTR2 | 6   | 55,152,345 | T            | G            | 0.390            | 1.000                  | intron                            | NA                             | NA                                                                                                                                                                                          | T                            |
| rs9370399  | HCRTR2 | 6   | 55,152,984 | A            | C            | 0.453            | 1.000                  | intron                            | NA                             | rs6929450, rs7768760                                                                                                                                                                        | T                            |
| rs7768760  | HCRTR2 | 6   | 55,153,334 | T            | G            | 0.492            | 1.000                  | intron                            | NA                             | rs6929450, rs9370399                                                                                                                                                                        | T                            |
| rs7775745  | HCRTR2 | 6   | 55,158,466 | G            | A            | 0.452            | 1.000                  | intron                            | NA                             | NA                                                                                                                                                                                          | T                            |
| rs3134689  | HCRTR2 | 6   | 55,162,711 | A            | G            | 0.203            | 0.998                  | intron                            | NA                             | rs3122148, rs13343017, rs3006854, rs3122149, rs3122151, rs3122153, rs3134696, rs3134699, rs3134701, rs3134708                                                                               | T                            |
| rs4712099  | HCRTR2 | 6   | 55,163,157 | G            | A            | 0.173            | 0.995                  | intron                            | NA                             | rs4142972                                                                                                                                                                                   | T                            |
| rs4236127  | HCRTR2 | 6   | 55,164,136 | T            | C            | 0.184            | 0.998                  | intron                            | NA                             | rs3122148, rs10498801, rs10948894, rs12526414, rs12663056, rs6922310, rs6937705, rs6937878                                                                                                  | T                            |
| rs9475195  | HCRTR2 | 6   | 55,168,977 | T            | C            | 0.388            | 1.000                  | intron                            | NA                             | rs12111375                                                                                                                                                                                  | T                            |

**Supplemental Table 3: SNP Information**

| SNP        | Gene   | Chr | Position   | Major Allele | Minor Allele | MAF <sup>a</sup> | Call Rate <sup>b</sup> | Chromosomal Location <sup>c</sup> | Amino Acid Change <sup>d</sup> | LD Bin ( $r^2 > 0.80$ ) <sup>e</sup>                                                                                                                                                                      | Analysis Sample <sup>f</sup> |
|------------|--------|-----|------------|--------------|--------------|------------------|------------------------|-----------------------------------|--------------------------------|-----------------------------------------------------------------------------------------------------------------------------------------------------------------------------------------------------------|------------------------------|
| rs3134696  | HCRTR2 | 6   | 55,170,060 | T            | C            | 0.203            | 1.000                  | intron                            | NA                             | rs3122148, rs13343017, rs3006854, rs3122149, rs3122151, rs3122153, rs3134689, rs3134699, rs3134701, rs3134708                                                                                             | T                            |
| rs3122148  | HCRTR2 | 6   | 55,173,948 | A            | G            | 0.205            | 0.995                  | intron                            | NA                             | rs10498801, rs10948894, rs12526414, rs12663056, rs13343017, rs3006854, rs3122149, rs3122151, rs3122153, rs3134689, rs3134696, rs3134699, rs3134701, rs3134708, rs4236127, rs6922310, rs6937705, rs6937878 | T                            |
| rs10498801 | HCRTR2 | 6   | 55,174,923 | G            | A            | 0.183            | 1.000                  | intron                            | NA                             | rs3122148, rs10948894, rs12526414, rs12663056, rs4236127, rs6922310, rs6937705, rs6937878                                                                                                                 | T                            |
| rs12111375 | HCRTR2 | 6   | 55,176,953 | T            | C            | 0.478            | 0.906                  | intron                            | NA                             | rs9475195                                                                                                                                                                                                 | T                            |
| rs9367622  | HCRTR2 | 6   | 55,177,132 | T            | C            | 0.147            | 1.000                  | intron                            | NA                             | rs12662510, rs9396060                                                                                                                                                                                     | T                            |
| rs3134705  | HCRTR2 | 6   | 55,182,315 | G            | A            | 0.400            | 1.000                  | intron                            | NA                             | NA                                                                                                                                                                                                        | T                            |
| rs3122153  | HCRTR2 | 6   | 55,184,612 | T            | G            | 0.218            | 0.998                  | intron                            | NA                             | rs3122148, rs13343017, rs3006854, rs3122149, rs3122151, rs3134689, rs3134696, rs3134699, rs3134701, rs3134708                                                                                             | T                            |
| rs4142972  | HCRTR2 | 6   | 55,184,896 | G            | A            | 0.177            | 1.000                  | intron                            | NA                             | rs4712099                                                                                                                                                                                                 | T                            |
| rs3122154  | HCRTR2 | 6   | 55,186,417 | C            | T            | 0.207            | 1.000                  | intron                            | NA                             | rs11751491, rs13198993, rs13200042, rs3122163, rs3134704, rs3134707, rs4609033, rs9370403, rs9464203                                                                                                      | T                            |
| rs12662510 | HCRTR2 | 6   | 55,187,850 | A            | G            | 0.146            | 0.983                  | intron                            | NA                             | rs9367622, rs9396060                                                                                                                                                                                      | T                            |
| rs9370403  | HCRTR2 | 6   | 55,189,315 | G            | C            | 0.191            | 0.954                  | intron                            | NA                             | rs11751491, rs13198993, rs13200042, rs3122154, rs3122163, rs3134704, rs3134707, rs4609033, rs9464203                                                                                                      | T                            |
| rs3134710  | HCRTR2 | 6   | 55,190,420 | A            | T            | 0.259            | 1.000                  | intron                            | NA                             | rs3122156, rs3122160, rs9382464                                                                                                                                                                           | T                            |
| rs3122156  | HCRTR2 | 6   | 55,190,766 | T            | G            | 0.261            | 1.000                  | intron                            | NA                             | rs3122160, rs3134710, rs9382464                                                                                                                                                                           | T                            |
| rs4311511  | HCRTR2 | 6   | 55,198,566 | A            | G            | 0.287            | 0.986                  | intron                            | NA                             | rs3122162, rs3122164, rs3122167, rs3134711, rs9349772, rs9349774, rs9396069, rs9475208, rs9475214                                                                                                         | T                            |
| rs4311512  | HCRTR2 | 6   | 55,198,654 | A            | G            | 0.283            | 1.000                  | intron                            | NA                             | rs7771240, rs9357849, rs9367624                                                                                                                                                                           | T                            |
| rs9382467  | HCRTR2 | 6   | 55,198,914 | A            | T            | 0.457            | 0.998                  | intron                            | NA                             | NA                                                                                                                                                                                                        | T                            |
| rs9349768  | HCRTR2 | 6   | 55,199,409 | A            | T            | 0.221            | 1.000                  | intron                            | NA                             | rs10498802, rs3800539, rs4074181, rs4496804, rs4530845, rs7452651, rs9349771, rs9357850, rs9357851, rs9357853, rs9357855, rs9367625, rs9367626, rs9367629, rs9396062                                      | T                            |
| rs7771240  | HCRTR2 | 6   | 55,201,790 | T            | C            | 0.280            | 0.998                  | intron                            | NA                             | rs4311512, rs9357849, rs9367624                                                                                                                                                                           | T                            |

**Supplemental Table 3: SNP Information**

| SNP       | Gene   | Chr | Position   | Major Allele | Minor Allele | MAF <sup>a</sup> | Call Rate <sup>b</sup> | Chromosomal Location <sup>c</sup> | Amino Acid Change <sup>d</sup> | LD Bin ( $r^2 > 0.80$ ) <sup>e</sup>                                                                                                                                 | Analysis Sample <sup>f</sup> |
|-----------|--------|-----|------------|--------------|--------------|------------------|------------------------|-----------------------------------|--------------------------------|----------------------------------------------------------------------------------------------------------------------------------------------------------------------|------------------------------|
| rs9357850 | HCRTR2 | 6   | 55,204,783 | C            | T            | 0.221            | 1.000                  | intron                            | NA                             | rs10498802, rs3800539, rs4074181, rs4496804, rs4530845, rs7452651, rs9349768, rs9349771, rs9357851, rs9357855, rs9367625, rs9367626, rs9367629, rs9396062            | T                            |
| rs9475210 | HCRTR2 | 6   | 55,210,529 | G            | A            | 0.061            | 1.000                  | intron                            | NA                             | rs9367624, rs9475206                                                                                                                                                 | T                            |
| rs4074181 | HCRTR2 | 6   | 55,211,426 | C            | T            | 0.218            | 0.998                  | intron                            | NA                             | rs10498802, rs3800539, rs4496804, rs4530845, rs7452651, rs9349768, rs9349771, rs9357850, rs9357851, rs9357853, rs9357855, rs9367625, rs9367626, rs9367629, rs9396062 | T                            |
| rs3134711 | HCRTR2 | 6   | 55,211,851 | G            | A            | 0.282            | 1.000                  | intron                            | NA                             | rs3122162, rs3122164, rs3122167, rs4311511, rs9349772, rs9349774, rs9396069, rs9475208, rs9475214                                                                    | T                            |
| rs7741664 | HCRTR2 | 6   | 55,213,260 | T            | C            | 0.255            | 0.998                  | intron                            | NA                             | rs9357853, rs9382471                                                                                                                                                 | T                            |
| rs9357853 | HCRTR2 | 6   | 55,213,660 | T            | C            | 0.261            | 1.000                  | intron                            | NA                             | rs3122167, rs4074181, rs7741664, rs9349768, rs9349772, rs9349774, rs9357851, rs9357855, rs9367626, rs9382471, rs9396062, rs9396069, rs9475208, rs9475214             | T                            |
| rs3122167 | HCRTR2 | 6   | 55,220,774 | T            | C            | 0.283            | 0.995                  | intron                            | NA                             | rs3122162, rs3122164, rs3134711, rs4311511, rs9349772, rs9349774, rs9357853, rs9396069, rs9475208, rs9475214                                                         | T                            |
| rs3122169 | HCRTR2 | 6   | 55,221,370 | A            | C            | 0.183            | 1.000                  | intron                            | NA                             | NA                                                                                                                                                                   | T                            |
| rs2811239 | HCRTR2 | 6   | 55,229,913 | G            | A            | 0.173            | 1.000                  | intron                            | NA                             | rs2653342, rs2653355                                                                                                                                                 | T                            |
| rs2653342 | HCRTR2 | 6   | 55,239,096 | G            | A            | 0.152            | 1.000                  | intron                            | NA                             | rs2653355, rs2811239                                                                                                                                                 | T                            |
| rs2653343 | HCRTR2 | 6   | 55,241,285 | A            | T            | 0.189            | 1.000                  | intron                            | NA                             | rs2653344, rs2653349, rs6929837                                                                                                                                      | T                            |
| rs2134294 | HCRTR2 | 6   | 55,242,206 | C            | T            | 0.438            | 0.998                  | intron                            | NA                             | rs10456702, rs12191932, rs1542896, rs1553332, rs1910123, rs2653348                                                                                                   | T                            |
| rs7452651 | HCRTR2 | 6   | 55,243,472 | G            | A            | 0.219            | 0.998                  | intron                            | NA                             | rs10498802, rs3800539, rs4074181, rs4496804, rs4530845, rs9349768, rs9349771, rs9357850, rs9357851, rs9357855, rs9367626, rs9367629, rs9396062                       | T                            |
| rs2653346 | HCRTR2 | 6   | 55,244,249 | G            | A            | 0.028            | 0.998                  | intron                            | NA                             | NA                                                                                                                                                                   | NA                           |
| rs6929837 | HCRTR2 | 6   | 55,244,576 | T            | A            | 0.189            | 1.000                  | intron                            | NA                             | rs2653343, rs2653344, rs2653349                                                                                                                                      | T                            |
| rs2653348 | HCRTR2 | 6   | 55,247,827 | C            | T            | 0.415            | 1.000                  | intron                            | NA                             | rs1553332, rs1910123, rs2134294, rs2653350, rs2653351                                                                                                                | T                            |
| rs2653349 | HCRTR2 | 6   | 55,250,296 | G            | A            | 0.188            | 1.000                  | coding                            | I308V (NP_001517)              | rs2653343, rs2653344, rs6929837                                                                                                                                      | T                            |
| rs2653350 | HCRTR2 | 6   | 55,252,061 | A            | G            | 0.429            | 1.000                  | intron                            | NA                             | rs10456702, rs12191932, rs1542896, rs2653348, rs2653351, rs2653352, rs2653353, rs2653354, rs2653357, rs2653359, rs2811228, rs2811231, rs2811232, rs2811233           | T                            |

**Supplemental Table 3: SNP Information**

| SNP        | Gene   | Chr | Position   | Major Allele | Minor Allele | MAF <sup>a</sup> | Call Rate <sup>b</sup> | Chromosomal Location <sup>c</sup> | Amino Acid Change <sup>d</sup> | LD Bin (r <sup>2</sup> > 0.80) <sup>e</sup>                                                                   | Analysis Sample <sup>f</sup> |
|------------|--------|-----|------------|--------------|--------------|------------------|------------------------|-----------------------------------|--------------------------------|---------------------------------------------------------------------------------------------------------------|------------------------------|
| rs2811228  | HCRTR2 | 6   | 55,260,768 | C            | A            | 0.385            | 0.998                  | flanking 3'UTR                    | NA                             | rs2653350, rs2653351, rs2653352, rs2653353, rs2653354, rs2653357, rs2653359, rs2811231, rs2811232, rs2811233  | T                            |
| rs10456702 | HCRTR2 | 6   | 55,261,975 | A            | G            | 0.453            | 1.000                  | flanking 3'UTR                    | NA                             | rs12191932, rs1542896, rs1553332, rs1910123, rs2134294, rs2653350, rs2653351                                  | T                            |
| rs2653357  | HCRTR2 | 6   | 55,264,698 | G            | A            | 0.382            | 0.998                  | flanking 3'UTR                    | NA                             | rs2653350, rs2653351, rs2653352, rs2653353, rs2653354, rs2653359, rs2811228, rs2811231, rs2811232, rs2811233  | T                            |
| rs6859392  | HTR1A  | 5   | 63,277,237 | G            | C            | 0.296            | 0.998                  | flanking 3'UTR                    | NA                             | NA                                                                                                            | T                            |
| rs10085024 | HTR1A  | 5   | 63,284,120 | C            | G            | 0.494            | 1.000                  | flanking 3'UTR                    | NA                             | rs10042486, rs12653018, rs1423691, rs1549274, rs2161615, rs4521432, rs6449693, rs6871991, rs6878612, rs878567 | T                            |
| rs1364043  | HTR1A  | 5   | 63,286,607 | T            | G            | 0.235            | 1.000                  | flanking 3'UTR                    | NA                             | NA                                                                                                            | T                            |
| rs6295     | HTR1A  | 5   | 63,294,321 | C            | G            | 0.499            | 0.993                  | flanking 5'UTR                    | NA                             | NA                                                                                                            | T                            |
| rs10042486 | HTR1A  | 5   | 63,297,085 | C            | T            | 0.496            | 0.998                  | flanking 5'UTR                    | NA                             | rs10085024, rs12653018, rs1423691, rs1549274, rs2161615, rs4521432, rs6449693, rs6871991, rs6878612, rs878567 | T                            |
| rs13436914 | HTR1A  | 5   | 63,297,951 | T            | C            | 0.001            | 1.000                  | flanking 5'UTR                    | NA                             | NA                                                                                                            | NA                           |
| rs12203487 | HTR1B  | 6   | 78,215,602 | T            | A            | 0.126            | 1.000                  | flanking 3'UTR                    | NA                             | rs10943458                                                                                                    | T                            |
| rs1145831  | HTR1B  | 6   | 78,217,292 | T            | C            | 0.220            | 0.998                  | flanking 3'UTR                    | NA                             | NA                                                                                                            | T                            |
| rs12527054 | HTR1B  | 6   | 78,220,647 | T            | C            | 0.075            | 0.998                  | flanking 3'UTR                    | NA                             | NA                                                                                                            | T                            |
| rs9350712  | HTR1B  | 6   | 78,220,836 | A            | T            | 0.457            | 0.995                  | flanking 3'UTR                    | NA                             | rs1160077, rs9352481                                                                                          | T                            |
| rs12527143 | HTR1B  | 6   | 78,221,317 | T            | C            | 0.199            | 1.000                  | flanking 3'UTR                    | NA                             | rs2211488                                                                                                     | T                            |
| rs9359271  | HTR1B  | 6   | 78,222,839 | A            | C            | 0.270            | 1.000                  | flanking 3'UTR                    | NA                             | NA                                                                                                            | T                            |
| rs2000292  | HTR1B  | 6   | 78,223,664 | G            | A            | 0.279            | 1.000                  | flanking 3'UTR                    | NA                             | rs10806098, rs13192352, rs6296, rs6298                                                                        | T                            |
| rs13212041 | HTR1B  | 6   | 78,227,843 | T            | C            | 0.193            | 1.000                  | flanking 3'UTR                    | NA                             | NA                                                                                                            | T                            |
| rs6297     | HTR1B  | 6   | 78,228,660 | T            | C            | 0.138            | 1.000                  | flanking 3'UTR                    | NA                             | rs12173930, rs1778258                                                                                         | T                            |
| rs6296     | HTR1B  | 6   | 78,228,979 | C            | G            | 0.281            | 1.000                  | coding                            | V287V<br>(NP_000854)           | rs10806098, rs12662392, rs13192352, rs2000292, rs6298                                                         | T                            |
| rs130060   | HTR1B  | 6   | 78,229,469 | A            | C            | 0.017            | 1.000                  | coding                            | F124C<br>(NP_000854)           | NA                                                                                                            | NA                           |
| rs130058   | HTR1B  | 6   | 78,230,000 | T            | A            | 0.286            | 0.998                  | flanking 5'UTR                    | NA                             | NA                                                                                                            | T                            |
| rs11568817 | HTR1B  | 6   | 78,230,101 | A            | C            | 0.440            | 1.000                  | flanking 5'UTR                    | NA                             | rs1213366, rs1213371, rs1213373, rs1228814, rs17273700, rs9361235                                             | T                            |
| rs1228814  | HTR1B  | 6   | 78,230,539 | G            | T            | 0.433            | 0.971                  | flanking 5'UTR                    | NA                             | rs11568817, rs1213366, rs1213371, rs1213373, rs17273700, rs9361235                                            | T                            |
| rs4140535  | HTR1B  | 6   | 78,231,771 | G            | A            | 0.372            | 1.000                  | flanking 5'UTR                    | NA                             | rs1936158                                                                                                     | T                            |
| rs10806098 | HTR1B  | 6   | 78,232,728 | G            | A            | 0.279            | 1.000                  | flanking 5'UTR                    | NA                             | rs12662392, rs13192352, rs2000292, rs6296, rs6298                                                             | T                            |
| rs1213365  | HTR1B  | 6   | 78,233,274 | C            | G            | 0.499            | 0.882                  | flanking 5'UTR                    | NA                             | rs1213370                                                                                                     | T                            |

**Supplemental Table 3: SNP Information**

| SNP        | Gene  | Chr | Position    | Major Allele | Minor Allele | MAF <sup>a</sup> | Call Rate <sup>b</sup> | Chromosomal Location <sup>c</sup> | Amino Acid Change <sup>d</sup> | LD Bin ( $r^2 > 0.80$ ) <sup>e</sup>                                                                                                                                                                                                                              | Analysis Sample <sup>f</sup> |
|------------|-------|-----|-------------|--------------|--------------|------------------|------------------------|-----------------------------------|--------------------------------|-------------------------------------------------------------------------------------------------------------------------------------------------------------------------------------------------------------------------------------------------------------------|------------------------------|
| rs1213366  | HTR1B | 6   | 78,233,589  | A            | G            | 0.433            | 1.000                  | flanking 5'UTR                    | NA                             | rs11568817, rs1213371, rs1213373, rs1228814, rs17273700, rs9361235                                                                                                                                                                                                | T                            |
| rs1213369  | HTR1B | 6   | 78,234,976  | C            | G            | 0.427            | 1.000                  | flanking 5'UTR                    | NA                             | rs1936158                                                                                                                                                                                                                                                         | T                            |
| rs1213370  | HTR1B | 6   | 78,235,516  | C            | G            | 0.475            | 1.000                  | flanking 5'UTR                    | NA                             | rs1213365                                                                                                                                                                                                                                                         | T                            |
| rs1213371  | HTR1B | 6   | 78,236,764  | C            | T            | 0.434            | 0.993                  | flanking 5'UTR                    | NA                             | rs11568817, rs1213366, rs1213373, rs1228814, rs17273700, rs9361235                                                                                                                                                                                                | T                            |
| rs1936158  | HTR1B | 6   | 78,241,094  | G            | T            | 0.409            | 1.000                  | flanking 5'UTR                    | NA                             | rs1213369, rs4140535                                                                                                                                                                                                                                              | T                            |
| rs12173930 | HTR1B | 6   | 78,243,153  | C            | T            | 0.133            | 1.000                  | flanking 5'UTR                    | NA                             | rs1778258, rs6297                                                                                                                                                                                                                                                 | T                            |
| rs2798949  | HTR1B | 6   | 78,246,853  | G            | A            | 0.340            | 0.998                  | flanking 5'UTR                    | NA                             | rs1891752                                                                                                                                                                                                                                                         | T                            |
| rs9352483  | HTR1B | 6   | 78,246,975  | G            | A            | 0.150            | 0.998                  | flanking 5'UTR                    | NA                             | rs6908090                                                                                                                                                                                                                                                         | T                            |
| rs4543330  | HTR1B | 6   | 78,247,352  | A            | C            | 0.139            | 0.998                  | flanking 5'UTR                    | NA                             | rs2226183                                                                                                                                                                                                                                                         | T                            |
| rs1343491  | HTR1B | 6   | 78,247,981  | C            | T            | 0.084            | 1.000                  | flanking 5'UTR                    | NA                             | rs13218546                                                                                                                                                                                                                                                        | T                            |
| rs1186675  | KCNJ9 | 1   | 158,305,708 | G            | A            | 0.124            | 1.000                  | intron                            | NA                             | rs12402888, rs3180694, rs3747619                                                                                                                                                                                                                                  | T                            |
| rs4656874  | KCNJ9 | 1   | 158,311,246 | C            | T            | 0.311            | 1.000                  | flanking 5'UTR                    | NA                             | rs2753268                                                                                                                                                                                                                                                         | T                            |
| rs4656876  | KCNJ9 | 1   | 158,317,016 | G            | C            | 0.477            | 1.000                  | flanking 5'UTR                    | NA                             | rs11265320, rs1321649, rs6677510                                                                                                                                                                                                                                  | T                            |
| rs2737703  | KCNJ9 | 1   | 158,322,556 | C            | T            | 0.356            | 0.998                  | intron                            | NA                             | rs11265318                                                                                                                                                                                                                                                        | T                            |
| rs2753268  | KCNJ9 | 1   | 158,324,876 | G            | A            | 0.308            | 1.000                  | 3'UTR                             | NA                             | rs4656874                                                                                                                                                                                                                                                         | T                            |
| rs2494211  | KCNJ9 | 1   | 158,325,236 | C            | T            | 0.356            | 0.998                  | 3'UTR                             | NA                             | NA                                                                                                                                                                                                                                                                | T                            |
| rs3180694  | KCNJ9 | 1   | 158,328,008 | C            | T            | 0.121            | 1.000                  | 3'UTR                             | NA                             | rs1186675, rs12402888, rs3747619                                                                                                                                                                                                                                  | T                            |
| rs12401728 | KCNJ9 | 1   | 158,328,583 | C            | T            | 0.205            | 1.000                  | intron                            | NA                             | rs12092798, rs12408242, rs2295621                                                                                                                                                                                                                                 | T                            |
| rs2369406  | KCNJ9 | 1   | 158,331,042 | C            | T            | 0.435            | 1.000                  | intron                            | NA                             | NA                                                                                                                                                                                                                                                                | T                            |
| rs11265320 | KCNJ9 | 1   | 158,336,536 | C            | T            | 0.481            | 0.998                  | flanking 5'UTR                    | NA                             | rs1321649, rs4656876, rs6677510                                                                                                                                                                                                                                   | T                            |
| rs11667211 | KLF16 | 19  | 1,790,483   | C            | T            | 0.143            | 1.000                  | intron                            | NA                             | NA                                                                                                                                                                                                                                                                | T                            |
| rs893539   | KLF16 | 19  | 1,794,493   | G            | A            | 0.254            | 0.990                  | intron                            | NA                             | rs1609760, rs893540                                                                                                                                                                                                                                               | T                            |
| rs1609761  | KLF16 | 19  | 1,798,698   | A            | C            | 0.211            | 0.988                  | intron                            | NA                             | rs11084912, rs12460105, rs3746038, rs3810417, rs4806814, rs4807152, rs893541                                                                                                                                                                                      | T                            |
| rs893541   | KLF16 | 19  | 1,809,183   | T            | C            | 0.186            | 1.000                  | intron                            | NA                             | rs11084912, rs12460105, rs1609761, rs3746038, rs3810417, rs4806814, rs4807152                                                                                                                                                                                     | T                            |
| rs3810417  | KLF16 | 19  | 1,815,601   | C            | T            | 0.169            | 0.993                  | flanking 5'UTR                    | NA                             | rs11084912, rs12460105, rs1609761, rs3746038, rs4806814, rs4807152, rs893541                                                                                                                                                                                      | T                            |
| rs10401329 | KLF16 | 19  | 1,822,699   | G            | A            | 0.130            | 0.952                  | flanking 3'UTR                    | NA                             | NA                                                                                                                                                                                                                                                                | G                            |
| rs5905613  | MAOA  | X   | 43,392,244  | C            | T            | 0.278            | 1.000                  | flanking 5'UTR                    | NA                             | rs1465108, rs2064070, rs2205718, rs2235185, rs2235186, rs2239448, rs3027400, rs3027401, rs3027407, rs3027410, rs3788863, rs4301558, rs4570308, rs5905702, rs5906729, rs5906883, rs5906893, rs5906938, rs5906974, rs5953385, rs6323, rs6520894, rs979605, rs979606 | NA                           |
| rs4824657  | MAOA  | X   | 43,397,246  | C            | G            | 0.276            | 0.930                  | flanking 5'UTR                    | NA                             | NA                                                                                                                                                                                                                                                                | NA                           |



**Supplemental Table 3: SNP Information**

| SNP       | Gene | Chr | Position   | Major Allele | Minor Allele | MAF <sup>a</sup> | Call Rate <sup>b</sup> | Chromosomal Location <sup>c</sup> | Amino Acid Change <sup>d</sup> | LD Bin ( $r^2 > 0.80$ ) <sup>e</sup>                                                                                                                                                                                                                               | Analysis Sample <sup>f</sup> |
|-----------|------|-----|------------|--------------|--------------|------------------|------------------------|-----------------------------------|--------------------------------|--------------------------------------------------------------------------------------------------------------------------------------------------------------------------------------------------------------------------------------------------------------------|------------------------------|
| rs3788862 | MAOA | X   | 43,402,308 | G            | A            | 0.281            | 0.998                  | intron                            | NA                             | NA                                                                                                                                                                                                                                                                 | NA                           |
| rs5906883 | MAOA | X   | 43,411,887 | C            | A            | 0.283            | 1.000                  | intron                            | NA                             | rs1465108, rs2064070, rs2205718, rs2235185, rs2235186, rs2239448, rs3027400, rs3027401, rs3027407, rs3027410, rs3788863, rs4301558, rs4570308, rs5905613, rs5905702, rs5906729, rs5906893, rs5906938, rs5906974, rs5953385, rs6323, rs6520894, rs979605, rs979606  | NA                           |
| rs1465108 | MAOA | X   | 43,423,153 | G            | A            | 0.284            | 1.000                  | intron                            | NA                             | rs2064070, rs2205718, rs2235185, rs2235186, rs2239448, rs3027400, rs3027401, rs3027407, rs3027410, rs3788863, rs4301558, rs4570308, rs5905613, rs5905702, rs5906729, rs5906883, rs5906893, rs5906938, rs5906974, rs5953385, rs6323, rs6520894, rs979605, rs979606  | NA                           |
| rs5906957 | MAOA | X   | 43,432,254 | G            | A            | 0.239            | 0.998                  | intron                            | NA                             | NA                                                                                                                                                                                                                                                                 | NA                           |
| rs909525  | MAOA | X   | 43,438,146 | T            | C            | 0.331            | 1.000                  | intron                            | NA                             | rs2072743, rs2072744, rs2283724, rs3027396, rs3027397, rs5905859                                                                                                                                                                                                   | NA                           |
| rs2283725 | MAOA | X   | 43,444,920 | G            | A            | 0.331            | 1.000                  | intron                            | NA                             | NA                                                                                                                                                                                                                                                                 | NA                           |
| rs3027399 | MAOA | X   | 43,477,666 | G            | C            | 0.058            | 0.995                  | intron                            | NA                             | NA                                                                                                                                                                                                                                                                 | NA                           |
| rs2205718 | MAOA | X   | 43,482,409 | G            | T            | 0.299            | 1.000                  | intron                            | NA                             | rs1465108, rs2064070, rs2235185, rs2235186, rs2239448, rs3027400, rs3027401, rs3027407, rs3027410, rs3788863, rs4301558, rs4570308, rs5905613, rs5905702, rs5906729, rs5906883, rs5906893, rs5906938, rs5906974, rs5953385, rs6323, rs6520894, rs979605, rs979606  | NA                           |
| rs2072743 | MAOA | X   | 43,484,465 | C            | T            | 0.347            | 0.998                  | intron                            | NA                             | rs2072744, rs2283724, rs3027396, rs3027397, rs5905859, rs909525                                                                                                                                                                                                    | NA                           |
| rs979606  | MAOA | X   | 43,486,086 | T            | C            | 0.299            | 0.998                  | intron                            | NA                             | rs1465108, rs2064070, rs2205718, rs2235185, rs2235186, rs2239448, rs3027400, rs3027401, rs3027407, rs3027410, rs3788863, rs4301558, rs4570308, rs5905613, rs5905702, rs5906729, rs5906883, rs5906893, rs5906938, rs5906974, rs5953385, rs6323, rs6520894, rs979605 | NA                           |
| rs3027409 | MAOA | X   | 43,491,977 | T            | G            | 0.050            | 1.000                  | flanking 3'UTR                    | NA                             | rs3027392, rs3027404, rs3027406, rs7052785                                                                                                                                                                                                                         | NA                           |

**Supplemental Table 3: SNP Information**

| SNP        | Gene  | Chr | Position   | Major Allele | Minor Allele | MAF <sup>a</sup> | Call Rate <sup>b</sup> | Chromosomal Location <sup>c</sup> | Amino Acid Change <sup>d</sup> | LD Bin ( $r^2 > 0.80$ ) <sup>e</sup>                                                                                                                                                                                                                              | Analysis Sample <sup>f</sup> |
|------------|-------|-----|------------|--------------|--------------|------------------|------------------------|-----------------------------------|--------------------------------|-------------------------------------------------------------------------------------------------------------------------------------------------------------------------------------------------------------------------------------------------------------------|------------------------------|
| rs2064070  | MAOA  | X   | 43,493,626 | T            | A            | 0.302            | 0.998                  | flanking 3'UTR                    | NA                             | rs1465108, rs2205718, rs2235185, rs2235186, rs2239448, rs3027400, rs3027401, rs3027407, rs3027410, rs3788863, rs4301558, rs4570308, rs5905613, rs5905702, rs5906729, rs5906883, rs5906893, rs5906938, rs5906974, rs5953385, rs6323, rs6520894, rs979605, rs979606 | NA                           |
| rs6609257  | MAOA  | X   | 43,497,652 | A            | G            | 0.428            | 1.000                  | flanking 3'UTR                    | NA                             | NA                                                                                                                                                                                                                                                                | NA                           |
| rs3027415  | MAOA  | X   | 43,499,385 | T            | C            | 0.218            | 1.000                  | flanking 3'UTR                    | NA                             | rs3027450, rs5905449                                                                                                                                                                                                                                              | NA                           |
| rs3027416  | MAOA  | X   | 43,499,578 | A            | NA           | 0.000            | 0.983                  | flanking 3'UTR                    | NA                             | NA                                                                                                                                                                                                                                                                | NA                           |
| rs3027421  | MAOB  | X   | 43,504,669 | G            | C            | 0.001            | 1.000                  | flanking 3'UTR                    | NA                             | NA                                                                                                                                                                                                                                                                | NA                           |
| rs3027431  | MAOB  | X   | 43,508,028 | G            | A            | 0.004            | 1.000                  | flanking 3'UTR                    | NA                             | NA                                                                                                                                                                                                                                                                | NA                           |
| rs12558036 | MAOB  | X   | 43,508,224 | C            | G            | 0.001            | 1.000                  | flanking 3'UTR                    | NA                             | NA                                                                                                                                                                                                                                                                | NA                           |
| rs1040398  | MAOB  | X   | 43,510,375 | A            | G            | 0.002            | 1.000                  | flanking 3'UTR                    | NA                             | NA                                                                                                                                                                                                                                                                | NA                           |
| rs1799836  | MAOB  | X   | 43,512,943 | T            | C            | 0.469            | 1.000                  | intron                            | NA                             | NA                                                                                                                                                                                                                                                                | NA                           |
| rs10521432 | MAOB  | X   | 43,518,684 | G            | A            | 0.291            | 0.998                  | intron                            | NA                             | rs2283729, rs3027456, rs6651806                                                                                                                                                                                                                                   | NA                           |
| rs7888450  | MAOB  | X   | 43,518,947 | T            | C            | 0.002            | 1.000                  | intron                            | NA                             | NA                                                                                                                                                                                                                                                                | NA                           |
| rs17310637 | MAOB  | X   | 43,524,923 | C            | G            | 0.001            | 1.000                  | intron                            | NA                             | NA                                                                                                                                                                                                                                                                | NA                           |
| rs12007768 | MAOB  | X   | 43,530,940 | G            | NA           | 0.000            | 1.000                  | intron                            | NA                             | NA                                                                                                                                                                                                                                                                | NA                           |
| rs2311013  | MAOB  | X   | 43,536,455 | T            | A            | 0.034            | 1.000                  | intron                            | NA                             | NA                                                                                                                                                                                                                                                                | NA                           |
| rs5905449  | MAOB  | X   | 43,540,597 | G            | A            | 0.221            | 0.998                  | intron                            | NA                             | rs3027415, rs3027450                                                                                                                                                                                                                                              | NA                           |
| rs3027459  | MAOB  | X   | 43,546,221 | C            | NA           | 0.000            | 1.000                  | intron                            | NA                             | NA                                                                                                                                                                                                                                                                | NA                           |
| rs736944   | MAOB  | X   | 43,559,979 | C            | T            | 0.175            | 1.000                  | intron                            | NA                             | rs12851487, rs3027449, rs3027452, rs4824562                                                                                                                                                                                                                       | NA                           |
| rs17146716 | MAOB  | X   | 43,564,576 | A            | G            | 0.002            | 1.000                  | intron                            | NA                             | NA                                                                                                                                                                                                                                                                | NA                           |
| rs6651806  | MAOB  | X   | 43,573,908 | A            | C            | 0.305            | 1.000                  | intron                            | NA                             | rs10521432, rs2283729, rs3027456                                                                                                                                                                                                                                  | NA                           |
| rs5952795  | MAOB  | X   | 43,582,223 | G            | NA           | 0.000            | 1.000                  | intron                            | NA                             | NA                                                                                                                                                                                                                                                                | NA                           |
| rs4824562  | MAOB  | X   | 43,588,734 | T            | C            | 0.156            | 1.000                  | intron                            | NA                             | rs12851487, rs3027449, rs3027452, rs5952799, rs736944                                                                                                                                                                                                             | NA                           |
| rs5952330  | MAOB  | X   | 43,589,225 | A            | NA           | 0.000            | 1.000                  | intron                            | NA                             | NA                                                                                                                                                                                                                                                                | NA                           |
| rs5952799  | MAOB  | X   | 43,589,787 | C            | T            | 0.156            | 0.954                  | intron                            | NA                             | rs12851487, rs4824562                                                                                                                                                                                                                                             | NA                           |
| rs5952813  | MAOB  | X   | 43,599,701 | G            | NA           | 0.000            | 1.000                  | intron                            | NA                             | NA                                                                                                                                                                                                                                                                | NA                           |
| rs5952340  | MAOB  | X   | 43,605,747 | T            | NA           | 0.000            | 1.000                  | intron                            | NA                             | NA                                                                                                                                                                                                                                                                | NA                           |
| rs5905512  | MAOB  | X   | 43,611,338 | G            | A            | 0.494            | 0.998                  | intron                            | NA                             | NA                                                                                                                                                                                                                                                                | NA                           |
| rs5952352  | MAOB  | X   | 43,613,532 | C            | NA           | 0.000            | 1.000                  | intron                            | NA                             | NA                                                                                                                                                                                                                                                                | NA                           |
| rs17759568 | MAPK1 | 22  | 20,440,627 | A            | G            | 0.042            | 1.000                  | flanking 3'UTR                    | NA                             | NA                                                                                                                                                                                                                                                                | NA                           |
| rs2276005  | MAPK1 | 22  | 20,443,688 | T            | G            | 0.043            | 1.000                  | flanking 3'UTR                    | NA                             | rs4821263, rs4821401, rs5755074, rs5755745, rs9610355                                                                                                                                                                                                             | NA                           |
| rs13515    | MAPK1 | 22  | 20,445,886 | C            | T            | 0.194            | 1.000                  | 3'UTR                             | NA                             | rs17759598, rs17759796, rs2876980, rs5999842, rs8140233                                                                                                                                                                                                           | T                            |

**Supplemental Table 3: SNP Information**

| SNP        | Gene  | Chr | Position   | Major Allele | Minor Allele | MAF <sup>a</sup> | Call Rate <sup>b</sup> | Chromosomal Location <sup>c</sup> | Amino Acid Change <sup>d</sup> | LD Bin ( $r^2 > 0.80$ ) <sup>e</sup>                                                                                                                                                                                                                                                                                                                                                                                                 | Analysis Sample <sup>f</sup> |
|------------|-------|-----|------------|--------------|--------------|------------------|------------------------|-----------------------------------|--------------------------------|--------------------------------------------------------------------------------------------------------------------------------------------------------------------------------------------------------------------------------------------------------------------------------------------------------------------------------------------------------------------------------------------------------------------------------------|------------------------------|
| rs1063311  | MAPK1 | 22  | 20,446,467 | C            | T            | 0.443            | 0.988                  | 3'UTR                             | R100C<br>(XP_498872)           | rs1892848, rs11704205, rs11913721, rs13943, rs1892846, rs2006893, rs2266966, rs2266967, rs2266969, rs2283791, rs2283792, rs2283793, rs2283794, rs2876981, rs3788332, rs3810610, rs4821402, rs5749806, rs5749986, rs5749998, rs5750113, rs5755099, rs5999515, rs5999521, rs5999550, rs5999749, rs5999752, rs6928, rs7290469, rs743409, rs8139376, rs9340, rs9607241, rs9607287, rs9607298, rs9610271, rs9610338, rs9610374, rs9610375 | T                            |
| rs5755074  | MAPK1 | 22  | 20,451,327 | C            | T            | 0.043            | 1.000                  | flanking 3'UTR                    | NA                             | rs2276005, rs4821263, rs4821401, rs5755745, rs9610355                                                                                                                                                                                                                                                                                                                                                                                | NA                           |
| rs2266966  | MAPK1 | 22  | 20,451,554 | T            | C            | 0.444            | 0.998                  | flanking 3'UTR                    | NA                             | rs1892848, rs1063311, rs11704205, rs11913721, rs13943, rs1892846, rs2006893, rs2266967, rs2266969, rs2283791, rs2283792, rs2283793, rs2876981, rs3788332, rs3810610, rs4821402, rs5749806, rs5749986, rs5749998, rs5755099, rs5999515, rs5999521, rs5999550, rs5999749, rs5999752, rs6928, rs7290469, rs743409, rs8139376, rs9340, rs9607241, rs9607287, rs9607298, rs9610271, rs9610338, rs9610374, rs9610375                       | T                            |
| rs17759598 | MAPK1 | 22  | 20,452,149 | T            | C            | 0.152            | 1.000                  | flanking 3'UTR                    | NA                             | rs13515, rs17759796, rs2876980, rs5999842, rs8140233                                                                                                                                                                                                                                                                                                                                                                                 | T                            |
| rs2298432  | MAPK1 | 22  | 20,453,189 | C            | A            | 0.353            | 0.998                  | flanking 3'UTR                    | NA                             | NA                                                                                                                                                                                                                                                                                                                                                                                                                                   | T                            |
| rs4821263  | MAPK1 | 22  | 20,457,490 | C            | T            | 0.042            | 1.000                  | intron                            | NA                             | rs2276005, rs4821401, rs5755074, rs5755745, rs9610355                                                                                                                                                                                                                                                                                                                                                                                | NA                           |
| rs743409   | MAPK1 | 22  | 20,459,215 | G            | A            | 0.451            | 1.000                  | intron                            | NA                             | rs1892848, rs1063311, rs11704205, rs11913721, rs13943, rs1892846, rs2006893, rs2266966, rs2266967, rs2266969, rs2283791, rs2283792, rs2283793, rs2283794, rs3788332, rs3810610, rs4821402, rs5749806, rs5749986, rs5749998, rs5750113, rs5755099, rs5755694, rs5999515, rs5999521, rs5999550, rs5999749, rs5999752, rs6928, rs8139376, rs9340, rs9607241, rs9607287, rs9607298, rs9610338, rs9610374, rs9610375                      | T                            |

**Supplemental Table 3: SNP Information**

| SNP        | Gene  | Chr | Position   | Major Allele | Minor Allele | MAF <sup>a</sup> | Call Rate <sup>b</sup> | Chromosomal Location <sup>c</sup> | Amino Acid Change <sup>d</sup> | LD Bin ( $r^2 > 0.80$ ) <sup>e</sup>                                                                                                                                                                                                                                                                                                                                                                           | Analysis Sample <sup>f</sup> |
|------------|-------|-----|------------|--------------|--------------|------------------|------------------------|-----------------------------------|--------------------------------|----------------------------------------------------------------------------------------------------------------------------------------------------------------------------------------------------------------------------------------------------------------------------------------------------------------------------------------------------------------------------------------------------------------|------------------------------|
| rs2283791  | MAPK1 | 22  | 20,460,945 | C            | G            | 0.441            | 0.993                  | intron                            | NA                             | rs1892848, rs1063311, rs11704205, rs11913721, rs13943, rs1892846, rs2006893, rs2266966, rs2266967, rs2266969, rs2283792, rs2283793, rs2876981, rs3788332, rs3810610, rs4821402, rs5749806, rs5749986, rs5749998, rs5755099, rs5999515, rs5999521, rs5999550, rs5999749, rs5999752, rs6928, rs7290469, rs743409, rs8139376, rs9340, rs9607241, rs9607287, rs9607298, rs9610271, rs9610338, rs9610374, rs9610375 | T                            |
| rs9607272  | MAPK1 | 22  | 20,466,398 | T            | G            | 0.249            | 1.000                  | intron                            | NA                             | rs3810606, rs3810608, rs9610417, rs9610470, rs9610487, rs9610496                                                                                                                                                                                                                                                                                                                                               | T                            |
| rs11704205 | MAPK1 | 22  | 20,475,253 | C            | T            | 0.459            | 1.000                  | intron                            | NA                             | rs1892848, rs1063311, rs11913721, rs13943, rs1892846, rs2006893, rs2266966, rs2266967, rs2266969, rs2283791, rs2283792, rs2283793, rs2283794, rs3788332, rs3810610, rs4821402, rs5749806, rs5749986, rs5749998, rs5750113, rs5755099, rs5755694, rs5999515, rs5999521, rs5999550, rs5999749, rs5999752, rs6928, rs743409, rs8139376, rs9340, rs9607241, rs9607287, rs9607298, rs9610338, rs9610374, rs9610375  | T                            |
| rs5999550  | MAPK1 | 22  | 20,481,286 | G            | C            | 0.459            | 1.000                  | intron                            | NA                             | rs1892848, rs1063311, rs11704205, rs11913721, rs13943, rs1892846, rs2006893, rs2266966, rs2266967, rs2266969, rs2283791, rs2283792, rs2283793, rs2283794, rs3788332, rs3810610, rs4821402, rs5749806, rs5749986, rs5749998, rs5750113, rs5755099, rs5755694, rs5999515, rs5999521, rs5999749, rs5999752, rs6928, rs743409, rs8139376, rs9340, rs9607241, rs9607287, rs9607298, rs9610338, rs9610374, rs9610375 | T                            |
| rs2298434  | MAPK1 | 22  | 20,483,239 | G            | A            | 0.042            | 1.000                  | intron                            | NA                             | NA                                                                                                                                                                                                                                                                                                                                                                                                             | NA                           |
| rs9610355  | MAPK1 | 22  | 20,493,633 | G            | A            | 0.042            | 1.000                  | intron                            | NA                             | rs2276005, rs4821263, rs4821401, rs5755074, rs5755745                                                                                                                                                                                                                                                                                                                                                          | NA                           |

**Supplemental Table 3: SNP Information**

| SNP       | Gene  | Chr | Position   | Major Allele | Minor Allele | MAF <sup>a</sup> | Call Rate <sup>b</sup> | Chromosomal Location <sup>c</sup> | Amino Acid Change <sup>d</sup> | LD Bin ( $r^2 > 0.80$ ) <sup>e</sup>                                                                                                                                                                                                                                                                                                                                                                           | Analysis Sample <sup>f</sup> |
|-----------|-------|-----|------------|--------------|--------------|------------------|------------------------|-----------------------------------|--------------------------------|----------------------------------------------------------------------------------------------------------------------------------------------------------------------------------------------------------------------------------------------------------------------------------------------------------------------------------------------------------------------------------------------------------------|------------------------------|
| rs3788332 | MAPK1 | 22  | 20,501,567 | A            | G            | 0.459            | 0.998                  | intron                            | NA                             | rs1892848, rs1063311, rs11704205, rs11913721, rs13943, rs1892846, rs2006893, rs2266966, rs2266967, rs2266969, rs2283791, rs2283792, rs2283793, rs2283794, rs3810610, rs4821402, rs5749806, rs5749986, rs5749998, rs5750113, rs5755099, rs5755694, rs5999515, rs5999521, rs5999550, rs5999749, rs5999752, rs6928, rs743409, rs8139376, rs9340, rs9607241, rs9607287, rs9607298, rs9610338, rs9610374, rs9610375 | T                            |
| rs5999704 | MAPK1 | 22  | 20,508,791 | G            | T            | 0.001            | 1.000                  | intron                            | NA                             | NA                                                                                                                                                                                                                                                                                                                                                                                                             | NA                           |
| rs1892848 | MAPK1 | 22  | 20,516,562 | C            | T            | 0.459            | 1.000                  | intron                            | NA                             | rs1063311, rs11704205, rs11913721, rs13943, rs1892846, rs2006893, rs2266966, rs2266967, rs2266969, rs2283791, rs2283792, rs2283793, rs2283794, rs3788332, rs3810610, rs4821402, rs5749806, rs5749986, rs5749998, rs5750113, rs5755099, rs5755694, rs5999515, rs5999521, rs5999550, rs5999749, rs5999752, rs6928, rs743409, rs8139376, rs9340, rs9607241, rs9607287, rs9607298, rs9610338, rs9610374, rs9610375 | T                            |
| rs9610375 | MAPK1 | 22  | 20,517,093 | G            | T            | 0.487            | 0.978                  | intron                            | NA                             | rs1892848, rs1063311, rs11704205, rs13943, rs1892846, rs2006893, rs2266966, rs2266967, rs2266969, rs2283791, rs2283792, rs2283793, rs2283794, rs3788332, rs3810610, rs4821402, rs5749806, rs5749986, rs5749998, rs5750113, rs5755099, rs5999515, rs5999521, rs5999550, rs5999749, rs5999752, rs6928, rs743409, rs8139376, rs9340, rs9607241, rs9607287, rs9607298, rs9610338, rs9610374                        | T                            |
| rs5755694 | MAPK1 | 22  | 20,530,530 | C            | T            | 0.444            | 1.000                  | intron                            | NA                             | rs1892848, rs11704205, rs13943, rs1892846, rs2006893, rs2266967, rs2283792, rs3788332, rs3810610, rs4821402, rs5749806, rs5749986, rs5749998, rs5755099, rs5999515, rs5999521, rs5999550, rs6928, rs743409, rs8136867, rs9607287                                                                                                                                                                               | T                            |
| rs8136867 | MAPK1 | 22  | 20,534,793 | A            | G            | 0.444            | 0.998                  | intron                            | NA                             | rs5755694                                                                                                                                                                                                                                                                                                                                                                                                      | T                            |

**Supplemental Table 3: SNP Information**

| SNP       | Gene  | Chr | Position    | Major Allele | Minor Allele | MAF <sup>a</sup> | Call Rate <sup>b</sup> | Chromosomal Location <sup>c</sup> | Amino Acid Change <sup>d</sup> | LD Bin ( $r^2 > 0.80$ ) <sup>e</sup>                                                                                                                                                                                                                                                                                                                                                                                                                                 | Analysis Sample <sup>f</sup> |
|-----------|-------|-----|-------------|--------------|--------------|------------------|------------------------|-----------------------------------|--------------------------------|----------------------------------------------------------------------------------------------------------------------------------------------------------------------------------------------------------------------------------------------------------------------------------------------------------------------------------------------------------------------------------------------------------------------------------------------------------------------|------------------------------|
| rs2876981 | MAPK1 | 22  | 20,535,611  | A            | C            | 0.400            | 1.000                  | intron                            | NA                             | rs1063311, rs11913721, rs2266966, rs2266969, rs2283791, rs2283793, rs5999749, rs5999752, rs8139376, rs9340, rs9607241, rs9607298, rs9610271, rs9610338, rs9610374                                                                                                                                                                                                                                                                                                    | T                            |
| rs9610470 | MAPK1 | 22  | 20,539,139  | T            | C            | 0.259            | 1.000                  | intron                            | NA                             | rs3810606, rs3810608, rs9607272, rs9610417, rs9610487, rs9610496                                                                                                                                                                                                                                                                                                                                                                                                     | T                            |
| rs4821401 | MAPK1 | 22  | 20,544,572  | T            | C            | 0.042            | 1.000                  | intron                            | NA                             | rs2276005, rs4821263, rs5755074, rs5755745, rs9610355                                                                                                                                                                                                                                                                                                                                                                                                                | NA                           |
| rs5755745 | MAPK1 | 22  | 20,550,816  | T            | C            | 0.044            | 1.000                  | intron                            | NA                             | rs2276005, rs4821263, rs4821401, rs5755074, rs9610355                                                                                                                                                                                                                                                                                                                                                                                                                | NA                           |
| rs5999891 | MAPK1 | 22  | 20,557,038  | A            | C            | 0.001            | 1.000                  | flanking 5'UTR                    | NA                             | NA                                                                                                                                                                                                                                                                                                                                                                                                                                                                   | NA                           |
| rs4678448 | NCK1  | 3   | 138,053,879 | C            | T            | 0.317            | 1.000                  | intron                            | NA                             | rs1052618, rs10935210, rs12330283, rs12487901, rs12637949, rs1344790, rs1433318, rs1433319, rs1865149, rs1965109, rs2031029, rs2343662, rs3772388, rs3845925, rs3856623, rs3963921, rs4678274, rs6439672, rs6771717, rs6775389, rs6783508, rs6784005, rs6786302, rs6786648, rs6797509, rs7611847, rs7629882, rs7648817, rs835648, rs938525, rs9818792, rs9827648, rs9833952, rs9836807, rs9846691, rs9848867, rs9855314, rs9859665, rs9865545, rs9874887, rs9878464  | T                            |
| rs1805300 | NCK1  | 3   | 138,058,932 | G            | A            | 0.317            | 1.000                  | flanking 3'UTR                    | NA                             | NA                                                                                                                                                                                                                                                                                                                                                                                                                                                                   | T                            |
| rs938525  | NCK1  | 3   | 138,064,643 | T            | C            | 0.313            | 1.000                  | intron                            | NA                             | rs1052618, rs10935210, rs12330283, rs12487901, rs12637949, rs1344790, rs1433318, rs1433319, rs1865149, rs1965109, rs2031029, rs2343662, rs3772388, rs3845925, rs3856623, rs3963921, rs4678274, rs4678448, rs6439672, rs6771717, rs6775389, rs6783508, rs6784005, rs6786302, rs6786648, rs6797509, rs7611847, rs7629882, rs7648817, rs835648, rs9818792, rs9827648, rs9833952, rs9836807, rs9846691, rs9848867, rs9855314, rs9859665, rs9865545, rs9874887, rs9878464 | T                            |
| rs9845460 | NCK1  | 3   | 138,069,807 | G            | A            | 0.236            | 1.000                  | intron                            | NA                             | rs12629000, rs16844241, rs4678275                                                                                                                                                                                                                                                                                                                                                                                                                                    | T                            |

**Supplemental Table 3: SNP Information**

| SNP        | Gene | Chr | Position    | Major Allele | Minor Allele | MAF <sup>a</sup> | Call Rate <sup>b</sup> | Chromosomal Location <sup>c</sup> | Amino Acid Change <sup>d</sup> | LD Bin ( $r^2 > 0.80$ ) <sup>e</sup>                                                                                                                                                                                                                                                                                                                                                                                                                                | Analysis Sample <sup>f</sup> |
|------------|------|-----|-------------|--------------|--------------|------------------|------------------------|-----------------------------------|--------------------------------|---------------------------------------------------------------------------------------------------------------------------------------------------------------------------------------------------------------------------------------------------------------------------------------------------------------------------------------------------------------------------------------------------------------------------------------------------------------------|------------------------------|
| rs9818792  | NCK1 | 3   | 138,072,010 | T            | C            | 0.311            | 0.998                  | intron                            | NA                             | rs1052618, rs10935210, rs12330283, rs12487901, rs12637949, rs1344790, rs1433318, rs1433319, rs1865149, rs1965109, rs2031029, rs2343662, rs3772388, rs3845925, rs3856623, rs3963921, rs4678274, rs4678448, rs6439672, rs6771717, rs6775389, rs6783508, rs6784005, rs6786302, rs6786648, rs6797509, rs7611847, rs7629882, rs7648817, rs835648, rs938525, rs9827648, rs9833952, rs9836807, rs9846691, rs9848867, rs9855314, rs9859665, rs9865545, rs9874887, rs9878464 | T                            |
| rs12330283 | NCK1 | 3   | 138,073,101 | T            | C            | 0.313            | 1.000                  | intron                            | NA                             | rs1052618, rs10935210, rs12487901, rs12637949, rs1344790, rs1433318, rs1433319, rs1865149, rs1965109, rs2031029, rs2343662, rs3772388, rs3845925, rs3856623, rs3963921, rs4678274, rs4678448, rs6439672, rs6771717, rs6775389, rs6783508, rs6784005, rs6786302, rs6786648, rs6797509, rs7611847, rs7629882, rs7648817, rs835648, rs938525, rs9818792, rs9827648, rs9833952, rs9836807, rs9846691, rs9848867, rs9855314, rs9859665, rs9865545, rs9874887, rs9878464  | T                            |
| rs1865149  | NCK1 | 3   | 138,078,300 | A            | G            | 0.313            | 1.000                  | intron                            | NA                             | rs1052618, rs10935210, rs12330283, rs12487901, rs12637949, rs1344790, rs1433318, rs1433319, rs1965109, rs2031029, rs2343662, rs3772388, rs3845925, rs3856623, rs3963921, rs4678274, rs4678448, rs6439672, rs6771717, rs6775389, rs6783508, rs6784005, rs6786302, rs6786648, rs6797509, rs7611847, rs7629882, rs7648817, rs835648, rs938525, rs9818792, rs9827648, rs9833952, rs9836807, rs9846691, rs9848867, rs9855314, rs9859665, rs9865545, rs9874887, rs9878464 | T                            |

**Supplemental Table 3: SNP Information**

| SNP       | Gene | Chr | Position    | Major Allele | Minor Allele | MAF <sup>a</sup> | Call Rate <sup>b</sup> | Chromosomal Location <sup>c</sup> | Amino Acid Change <sup>d</sup> | LD Bin ( $r^2 > 0.80$ ) <sup>e</sup>                                                                                                                                                                                                                                                                                                                                                                                                                                | Analysis Sample <sup>f</sup> |
|-----------|------|-----|-------------|--------------|--------------|------------------|------------------------|-----------------------------------|--------------------------------|---------------------------------------------------------------------------------------------------------------------------------------------------------------------------------------------------------------------------------------------------------------------------------------------------------------------------------------------------------------------------------------------------------------------------------------------------------------------|------------------------------|
| rs2343662 | NCK1 | 3   | 138,083,736 | A            | T            | 0.314            | 1.000                  | intron                            | NA                             | rs1052618, rs10935210, rs12330283, rs12487901, rs12637949, rs1344790, rs1433318, rs1433319, rs1865149, rs1965109, rs2031029, rs3772388, rs3845925, rs3856623, rs3963921, rs4678274, rs4678448, rs6439672, rs6771717, rs6775389, rs6783508, rs6784005, rs6786302, rs6786648, rs6797509, rs7611847, rs7629882, rs7648817, rs835648, rs938525, rs9818792, rs9827648, rs9833952, rs9836807, rs9846691, rs9848867, rs9855314, rs9859665, rs9865545, rs9874887, rs9878464 | T                            |
| rs9846691 | NCK1 | 3   | 138,088,961 | C            | T            | 0.313            | 1.000                  | intron                            | NA                             | rs1052618, rs10935210, rs12330283, rs12487901, rs12637949, rs1344790, rs1433318, rs1433319, rs1865149, rs1965109, rs2031029, rs2343662, rs3772388, rs3845925, rs3856623, rs3963921, rs4678274, rs4678448, rs6439672, rs6771717, rs6775389, rs6783508, rs6784005, rs6786302, rs6786648, rs6797509, rs7611847, rs7629882, rs7648817, rs835648, rs938525, rs9818792, rs9827648, rs9833952, rs9836807, rs9848867, rs9855314, rs9859665, rs9865545, rs9874887, rs9878464 | T                            |
| rs6784005 | NCK1 | 3   | 138,095,451 | G            | C            | 0.312            | 0.873                  | intron                            | NA                             | rs1052618, rs10935210, rs12330283, rs12487901, rs12637949, rs1344790, rs1433318, rs1433319, rs1865149, rs1965109, rs2031029, rs2343662, rs3772388, rs3845925, rs3856623, rs3963921, rs4678274, rs4678448, rs6439672, rs6771717, rs6775389, rs6783508, rs6786302, rs6786648, rs6797509, rs7611847, rs7629882, rs7648817, rs835648, rs938525, rs9818792, rs9827648, rs9833952, rs9836807, rs9846691, rs9848867, rs9855314, rs9859665, rs9865545, rs9874887, rs9878464 | T                            |
| rs9824147 | NCK1 | 3   | 138,100,688 | A            | T            | 0.035            | 0.998                  | intron                            | NA                             | NA                                                                                                                                                                                                                                                                                                                                                                                                                                                                  | NA                           |
| rs9867325 | NCK1 | 3   | 138,101,599 | G            | C            | 0.233            | 0.998                  | intron                            | NA                             | rs1052620                                                                                                                                                                                                                                                                                                                                                                                                                                                           | T                            |
| rs6761993 | NCK1 | 3   | 138,108,592 | T            | C            | 0.393            | 0.993                  | intron                            | NA                             | NA                                                                                                                                                                                                                                                                                                                                                                                                                                                                  | T                            |
| rs9837990 | NCK1 | 3   | 138,115,626 | G            | C            | 0.394            | 1.000                  | intron                            | NA                             | rs835636, rs1347209, rs2117009, rs6803618, rs9289523, rs9828009, rs9859810, rs9881139                                                                                                                                                                                                                                                                                                                                                                               | T                            |



**Supplemental Table 3: SNP Information**

| SNP        | Gene | Chr | Position    | Major Allele | Minor Allele | MAF <sup>a</sup> | Call Rate <sup>b</sup> | Chromosomal Location <sup>c</sup> | Amino Acid Change <sup>d</sup> | LD Bin ( $r^2 > 0.80$ ) <sup>e</sup>                                                                                                                                                                                                                                                                                                                                                                                                                                | Analysis Sample <sup>f</sup> |
|------------|------|-----|-------------|--------------|--------------|------------------|------------------------|-----------------------------------|--------------------------------|---------------------------------------------------------------------------------------------------------------------------------------------------------------------------------------------------------------------------------------------------------------------------------------------------------------------------------------------------------------------------------------------------------------------------------------------------------------------|------------------------------|
| rs9881139  | NCK1 | 3   | 138,116,730 | G            | A            | 0.393            | 1.000                  | intron                            | NA                             | rs835636, rs1347209, rs2117009, rs6803618, rs9289523, rs9828009, rs9837990, rs9859810                                                                                                                                                                                                                                                                                                                                                                               | T                            |
| rs4678274  | NCK1 | 3   | 138,121,927 | G            | T            | 0.313            | 1.000                  | intron                            | NA                             | rs1052618, rs10935210, rs12330283, rs12487901, rs12637949, rs1344790, rs1433318, rs1433319, rs1865149, rs1965109, rs2031029, rs2343662, rs3772388, rs3845925, rs3856623, rs3963921, rs4678448, rs6439672, rs6771717, rs6775389, rs6783508, rs6784005, rs6786302, rs6786648, rs6797509, rs7611847, rs7629882, rs7648817, rs835648, rs938525, rs9818792, rs9827648, rs9833952, rs9836807, rs9846691, rs9848867, rs9855314, rs9859665, rs9865545, rs9874887, rs9878464 | T                            |
| rs10935210 | NCK1 | 3   | 138,133,843 | G            | A            | 0.313            | 0.998                  | intron                            | NA                             | rs1052618, rs12330283, rs12487901, rs12637949, rs1344790, rs1433318, rs1433319, rs1865149, rs1965109, rs2031029, rs2343662, rs3772388, rs3845925, rs3856623, rs3963921, rs4678274, rs4678448, rs6439672, rs6771717, rs6775389, rs6783508, rs6784005, rs6786302, rs6786648, rs6797509, rs7611847, rs7629882, rs7648817, rs835648, rs938525, rs9818792, rs9827648, rs9833952, rs9836807, rs9846691, rs9848867, rs9855314, rs9859665, rs9865545, rs9874887, rs9878464  | T                            |
| rs6775389  | NCK1 | 3   | 138,142,414 | T            | C            | 0.313            | 1.000                  | intron                            | NA                             | rs1052618, rs10935210, rs12330283, rs12487901, rs12637949, rs1344790, rs1433318, rs1433319, rs1865149, rs1965109, rs2031029, rs2343662, rs3772388, rs3845925, rs3856623, rs3963921, rs4678274, rs4678448, rs6439672, rs6771717, rs6783508, rs6784005, rs6786302, rs6786648, rs6797509, rs7611847, rs7629882, rs7648817, rs835648, rs938525, rs9818792, rs9827648, rs9833952, rs9836807, rs9846691, rs9848867, rs9855314, rs9859665, rs9865545, rs9874887, rs9878464 | T                            |

**Supplemental Table 3: SNP Information**

| SNP        | Gene  | Chr | Position    | Major Allele | Minor Allele | MAF <sup>a</sup> | Call Rate <sup>b</sup> | Chromosomal Location <sup>c</sup> | Amino Acid Change <sup>d</sup> | LD Bin ( $r^2 > 0.80$ ) <sup>e</sup>                                                                                                                                                                                                                                                                                                                                                                                                                                | Analysis Sample <sup>f</sup> |
|------------|-------|-----|-------------|--------------|--------------|------------------|------------------------|-----------------------------------|--------------------------------|---------------------------------------------------------------------------------------------------------------------------------------------------------------------------------------------------------------------------------------------------------------------------------------------------------------------------------------------------------------------------------------------------------------------------------------------------------------------|------------------------------|
| rs1433318  | NCK1  | 3   | 138,149,144 | T            | C            | 0.313            | 0.998                  | intron                            | NA                             | rs1052618, rs10935210, rs12330283, rs12487901, rs12637949, rs1344790, rs1433319, rs1865149, rs1965109, rs2031029, rs2343662, rs3772388, rs3845925, rs3856623, rs3963921, rs4678274, rs4678448, rs6439672, rs6771717, rs6775389, rs6783508, rs6784005, rs6786302, rs6786648, rs6797509, rs7611847, rs7629882, rs7648817, rs835648, rs938525, rs9818792, rs9827648, rs9833952, rs9836807, rs9846691, rs9848867, rs9855314, rs9859665, rs9865545, rs9874887, rs9878464 | T                            |
| rs835648   | NCK1  | 3   | 138,154,194 | T            | A            | 0.303            | 1.000                  | flanking 3'UTR                    | NA                             | rs1052618, rs10935210, rs12330283, rs12487901, rs12637949, rs1344790, rs1433318, rs1433319, rs1865149, rs1965109, rs2031029, rs2343662, rs3845925, rs3856623, rs3963921, rs4678274, rs4678448, rs6439672, rs6771717, rs6775389, rs6783508, rs6784005, rs6786302, rs6786648, rs6797509, rs7611847, rs7629882, rs7648817, rs938525, rs9818792, rs9827648, rs9833952, rs9836807, rs9846691, rs9848867, rs9855314, rs9859665, rs9865545, rs9874887, rs9878464           | T                            |
| rs7648198  | NCK1  | 3   | 138,154,451 | A            | C            | 0.470            | 0.998                  | flanking 3'UTR                    | NA                             | NA                                                                                                                                                                                                                                                                                                                                                                                                                                                                  | T                            |
| rs835637   | NCK1  | 3   | 138,155,847 | A            | T            | 0.454            | 0.998                  | flanking 5'UTR                    | NA                             | rs835636                                                                                                                                                                                                                                                                                                                                                                                                                                                            | T                            |
| rs835636   | NCK1  | 3   | 138,157,190 | C            | A            | 0.483            | 0.998                  | flanking 5'UTR                    | NA                             | rs1347209, rs2117009, rs6803618, rs835637, rs9289523, rs9828009, rs9837990, rs9859810, rs9881139                                                                                                                                                                                                                                                                                                                                                                    | T                            |
| rs835634   | NCK1  | 3   | 138,158,993 | C            | T            | 0.410            | 0.998                  | flanking 5'UTR                    | NA                             | rs12054219, rs12054408, rs835632                                                                                                                                                                                                                                                                                                                                                                                                                                    | T                            |
| rs12054220 | NCK1  | 3   | 138,160,271 | A            | G            | 0.494            | 1.000                  | intron                            | NA                             | NA                                                                                                                                                                                                                                                                                                                                                                                                                                                                  | T                            |
| rs16840214 | NR4A2 | 2   | 156,875,018 | C            | T            | 0.213            | 1.000                  | flanking 3'UTR                    | NA                             | rs16840216                                                                                                                                                                                                                                                                                                                                                                                                                                                          | T                            |
| rs707127   | NR4A2 | 2   | 156,877,056 | C            | T            | 0.362            | 0.998                  | flanking 3'UTR                    | NA                             | rs10195293                                                                                                                                                                                                                                                                                                                                                                                                                                                          | T                            |
| rs1528454  | NR4A2 | 2   | 156,877,951 | T            | C            | 0.299            | 1.000                  | flanking 3'UTR                    | NA                             | rs10195293                                                                                                                                                                                                                                                                                                                                                                                                                                                          | T                            |
| rs1150143  | NR4A2 | 2   | 156,885,862 | C            | G            | 0.338            | 1.000                  | flanking 3'UTR                    | NA                             | rs1150144, rs707130, rs834829, rs834831, rs834834, rs834835                                                                                                                                                                                                                                                                                                                                                                                                         | T                            |
| rs1150144  | NR4A2 | 2   | 156,886,749 | A            | G            | 0.308            | 1.000                  | flanking 3'UTR                    | NA                             | rs1150143, rs707130, rs834829, rs834831, rs834834, rs834835                                                                                                                                                                                                                                                                                                                                                                                                         | T                            |
| rs12803    | NR4A2 | 2   | 156,890,171 | C            | A            | 0.475            | 1.000                  | 3'UTR                             | NA                             | NA                                                                                                                                                                                                                                                                                                                                                                                                                                                                  | T                            |
| rs13428968 | NR4A2 | 2   | 156,900,859 | T            | C            | 0.165            | 1.000                  | flanking 5'UTR                    | NA                             | NA                                                                                                                                                                                                                                                                                                                                                                                                                                                                  | T                            |
| rs834829   | NR4A2 | 2   | 156,909,095 | G            | A            | 0.307            | 1.000                  | flanking 5'UTR                    | NA                             | rs1150143, rs1150144, rs707130, rs834831, rs834834, rs834835                                                                                                                                                                                                                                                                                                                                                                                                        | T                            |

**Supplemental Table 3: SNP Information**

| SNP        | Gene  | Chr | Position    | Major Allele | Minor Allele | MAF <sup>a</sup> | Call Rate <sup>b</sup> | Chromosomal Location <sup>c</sup> | Amino Acid Change <sup>d</sup> | LD Bin ( $r^2 > 0.80$ ) <sup>e</sup>                                                                                                                                                                                                                                                                                              | Analysis Sample <sup>f</sup> |
|------------|-------|-----|-------------|--------------|--------------|------------------|------------------------|-----------------------------------|--------------------------------|-----------------------------------------------------------------------------------------------------------------------------------------------------------------------------------------------------------------------------------------------------------------------------------------------------------------------------------|------------------------------|
| rs834830   | NR4A2 | 2   | 156,911,506 | A            | G            | 0.230            | 1.000                  | flanking 5'UTR                    | NA                             | NA                                                                                                                                                                                                                                                                                                                                | T                            |
| rs6700238  | NTRK1 | 1   | 155,089,868 | A            | NA           | 0.000            | 0.971                  | intron                            | NA                             | NA                                                                                                                                                                                                                                                                                                                                | NA                           |
| rs1800878  | NTRK1 | 1   | 155,100,893 | G            | T            | 0.031            | 1.000                  | intron                            | NA                             | NA                                                                                                                                                                                                                                                                                                                                | NA                           |
| rs1800879  | NTRK1 | 1   | 155,104,765 | C            | T            | 0.363            | 1.000                  | intron                            | NA                             | NA                                                                                                                                                                                                                                                                                                                                | T                            |
| rs6334     | NTRK1 | 1   | 155,112,857 | G            | A            | 0.235            | 1.000                  | coding                            | Q558Q<br>(NP_002520)           | NA                                                                                                                                                                                                                                                                                                                                | T                            |
| rs6336     | NTRK1 | 1   | 155,115,542 | C            | T            | 0.066            | 1.000                  | coding                            | H604Y<br>(NP_002520)           | NA                                                                                                                                                                                                                                                                                                                                | T                            |
| rs2644596  | NTRK1 | 1   | 155,118,938 | C            | G            | 0.203            | 1.000                  | flanking 3'UTR                    | NA                             | NA                                                                                                                                                                                                                                                                                                                                | T                            |
| rs943551   | NTRK1 | 1   | 155,122,121 | C            | T            | 0.067            | 1.000                  | flanking 3'UTR                    | NA                             | rs943552                                                                                                                                                                                                                                                                                                                          | T                            |
| rs943552   | NTRK1 | 1   | 155,122,242 | C            | T            | 0.067            | 0.998                  | flanking 3'UTR                    | A16V<br>(XP_371320)            | rs943551                                                                                                                                                                                                                                                                                                                          | T                            |
| rs2768762  | NTRK1 | 1   | 155,127,086 | T            | G            | 0.198            | 1.000                  | flanking 3'UTR                    | NA                             | NA                                                                                                                                                                                                                                                                                                                                | T                            |
| rs2644620  | NTRK1 | 1   | 155,127,792 | T            | C            | 0.113            | 1.000                  | flanking 3'UTR                    | NA                             | rs2644621, rs2935228, rs2986716                                                                                                                                                                                                                                                                                                   | T                            |
| rs12210856 | OPRM1 | 6   | 154,399,679 | T            | G            | 0.042            | 1.000                  | flanking 5'UTR                    | NA                             | rs10457090, rs12205732, rs12209447,<br>rs6912029, rs7748401                                                                                                                                                                                                                                                                       | NA                           |
| rs1799972  | OPRM1 | 6   | 154,402,389 | C            | T            | 0.005            | 0.998                  | coding                            | A6V<br>(NP_000905)             | NA                                                                                                                                                                                                                                                                                                                                | NA                           |
| rs1799971  | OPRM1 | 6   | 154,402,490 | A            | G            | 0.120            | 1.000                  | coding                            | N40D<br>(NP_000905)            | NA                                                                                                                                                                                                                                                                                                                                | T                            |
| rs510769   | OPRM1 | 6   | 154,403,712 | C            | T            | 0.255            | 1.000                  | intron                            | NA                             | rs589046                                                                                                                                                                                                                                                                                                                          | T                            |
| rs477292   | OPRM1 | 6   | 154,405,080 | C            | T            | 0.221            | 1.000                  | intron                            | NA                             | rs607759, rs499796, rs509544, rs511435,<br>rs514980, rs520321, rs524731, rs553202,<br>rs557748, rs634479, rs668394                                                                                                                                                                                                                | T                            |
| rs557748   | OPRM1 | 6   | 154,405,995 | G            | A            | 0.221            | 1.000                  | intron                            | NA                             | rs607759, rs477292, rs499796, rs509544,<br>rs511435, rs514980, rs520321, rs524731,<br>rs553202, rs634479, rs668394                                                                                                                                                                                                                | T                            |
| rs514980   | OPRM1 | 6   | 154,409,860 | T            | C            | 0.216            | 0.998                  | intron                            | NA                             | rs607759, rs477292, rs499796, rs509544,<br>rs511435, rs520321, rs524731, rs553202,<br>rs557748, rs634479, rs668394                                                                                                                                                                                                                | T                            |
| rs4870266  | OPRM1 | 6   | 154,410,691 | G            | A            | 0.068            | 1.000                  | intron                            | NA                             | NA                                                                                                                                                                                                                                                                                                                                | T                            |
| rs607759   | OPRM1 | 6   | 154,414,130 | C            | T            | 0.221            | 0.998                  | intron                            | NA                             | rs477292, rs499796, rs509544, rs511435,<br>rs514980, rs520321, rs524731, rs553202,<br>rs557748, rs634479, rs668394                                                                                                                                                                                                                | T                            |
| rs610231   | OPRM1 | 6   | 154,420,170 | A            | G            | 0.120            | 0.998                  | intron                            | NA                             | NA                                                                                                                                                                                                                                                                                                                                | T                            |
| rs3823010  | OPRM1 | 6   | 154,420,845 | G            | A            | 0.162            | 1.000                  | intron                            | NA                             | rs17209711, rs3778158, rs1381376,<br>rs1461773, rs17275521, rs3778145,<br>rs3778146, rs3778147, rs3778148,<br>rs3778149, rs3778150, rs3778151,<br>rs3778153, rs3778155, rs3778156,<br>rs3778157, rs3798678, rs6927269,<br>rs6936615, rs7772959, rs7773995,<br>rs9285542, rs9322445, rs9478501,<br>rs9478503, rs9478504, rs9479754 | T                            |

**Supplemental Table 3: SNP Information**

| SNP        | Gene  | Chr | Position    | Major Allele | Minor Allele | MAF <sup>a</sup> | Call Rate <sup>b</sup> | Chromosomal Location <sup>c</sup> | Amino Acid Change <sup>d</sup> | LD Bin ( $r^2 > 0.80$ ) <sup>e</sup>                                                                                                                                                                                                                                                                      | Analysis Sample <sup>f</sup> |
|------------|-------|-----|-------------|--------------|--------------|------------------|------------------------|-----------------------------------|--------------------------------|-----------------------------------------------------------------------------------------------------------------------------------------------------------------------------------------------------------------------------------------------------------------------------------------------------------|------------------------------|
| rs7773995  | OPRM1 | 6   | 154,424,060 | C            | T            | 0.162            | 1.000                  | intron                            | NA                             | rs17209711, rs3778158, rs1381376, rs1461773, rs17275521, rs3778145, rs3778146, rs3778147, rs3778148, rs3778149, rs3778150, rs3778151, rs3778153, rs3778155, rs3778156, rs3778157, rs3798678, rs3823010, rs6927269, rs6936615, rs7772959, rs9285542, rs9322445, rs9478501, rs9478503, rs9478504, rs9479754 | T                            |
| rs495491   | OPRM1 | 6   | 154,424,235 | A            | G            | 0.258            | 1.000                  | intron                            | NA                             | NA                                                                                                                                                                                                                                                                                                        | T                            |
| rs589046   | OPRM1 | 6   | 154,434,831 | C            | T            | 0.258            | 1.000                  | intron                            | NA                             | rs510769                                                                                                                                                                                                                                                                                                  | T                            |
| rs1381376  | OPRM1 | 6   | 154,434,951 | C            | T            | 0.159            | 1.000                  | intron                            | NA                             | rs17209711, rs3778158, rs1461773, rs17275521, rs3778145, rs3778146, rs3778147, rs3778148, rs3778149, rs3778150, rs3778151, rs3778153, rs3778155, rs3778156, rs3778157, rs3798678, rs3823010, rs6927269, rs7772959, rs7773995, rs9285542, rs9322445, rs9478501, rs9478503, rs9478504, rs9479754            | T                            |
| rs3778151  | OPRM1 | 6   | 154,435,373 | T            | C            | 0.164            | 1.000                  | intron                            | NA                             | rs17209711, rs3778158, rs1381376, rs1461773, rs17275521, rs3778145, rs3778146, rs3778147, rs3778148, rs3778149, rs3778150, rs3778151, rs3778153, rs3778155, rs3778156, rs3778157, rs3798678, rs3823010, rs6927269, rs7773995, rs9285542, rs9478501, rs9478503, rs9478504, rs9479754                       | T                            |
| rs17209711 | OPRM1 | 6   | 154,438,148 | T            | A            | 0.158            | 1.000                  | intron                            | NA                             | rs3778158, rs1381376, rs1461773, rs17275521, rs3778145, rs3778146, rs3778147, rs3778148, rs3778149, rs3778150, rs3778151, rs3778153, rs3778155, rs3778156, rs3778157, rs3798678, rs3823010, rs6927269, rs7772959, rs7773995, rs9285542, rs9322445, rs9478501, rs9478503, rs9478504, rs9479754             | T                            |
| rs3778155  | OPRM1 | 6   | 154,445,511 | C            | T            | 0.171            | 0.938                  | intron                            | NA                             | rs17209711, rs3778158, rs1381376, rs1461773, rs17275521, rs3778145, rs3778146, rs3778147, rs3778148, rs3778149, rs3778150, rs3778151, rs3778153, rs3778156, rs3778157, rs3798678, rs3823010, rs6927269, rs7772959, rs7773995, rs9285542, rs9322445, rs9478501, rs9478503, rs9478504, rs9479754            | T                            |

**Supplemental Table 3: SNP Information**

| SNP       | Gene  | Chr | Position    | Major Allele | Minor Allele | MAF <sup>a</sup> | Call Rate <sup>b</sup> | Chromosomal Location <sup>c</sup> | Amino Acid Change <sup>d</sup> | LD Bin ( $r^2 > 0.80$ ) <sup>e</sup>                                                                                                                                                                                                                                     | Analysis Sample <sup>f</sup> |
|-----------|-------|-----|-------------|--------------|--------------|------------------|------------------------|-----------------------------------|--------------------------------|--------------------------------------------------------------------------------------------------------------------------------------------------------------------------------------------------------------------------------------------------------------------------|------------------------------|
| rs3778158 | OPRM1 | 6   | 154,447,423 | A            | T            | 0.159            | 1.000                  | intron                            | NA                             | rs17209711, rs1381376, rs1461773, rs17275521, rs3778145, rs3778146, rs3778147, rs3778148, rs3778149, rs3778150, rs3778151, rs3778153, rs3778155, rs3778156, rs3778157, rs3798678, rs3823010, rs6927269, rs7772959, rs7773995, rs9285542, rs9478503, rs9478504, rs9479754 | T                            |
| rs563649  | OPRM1 | 6   | 154,449,660 | C            | T            | 0.091            | 1.000                  | intron                            | NA                             | NA                                                                                                                                                                                                                                                                       | T                            |
| rs9322446 | OPRM1 | 6   | 154,450,395 | G            | A            | 0.155            | 1.000                  | intron                            | NA                             | NA                                                                                                                                                                                                                                                                       | T                            |
| rs9479757 | OPRM1 | 6   | 154,453,037 | G            | A            | 0.101            | 1.000                  | flanking 3'UTR                    | NA                             | rs10485057, rs511420, rs544093, rs556716, rs590761, rs599945, rs613341, rs616585, rs617648, rs620496, rs625109, rs628618, rs632395, rs636433, rs645189, rs649840, rs664247, rs9479756                                                                                    | T                            |
| rs2075572 | OPRM1 | 6   | 154,453,697 | C            | G            | 0.442            | 1.000                  | flanking 5'UTR                    | NA                             | NA                                                                                                                                                                                                                                                                       | T                            |
| rs510587  | OPRM1 | 6   | 154,455,121 | G            | A            | 0.050            | 1.000                  | flanking 3'UTR                    | NA                             | NA                                                                                                                                                                                                                                                                       | T                            |
| rs9282821 | OPRM1 | 6   | 154,456,068 | C            | A            | 0.427            | 1.000                  | flanking 5'UTR                    | NA                             | NA                                                                                                                                                                                                                                                                       | T                            |
| rs540825  | OPRM1 | 6   | 154,456,139 | T            | A            | 0.251            | 1.000                  | coding                            | NA                             | rs1323043, rs497315, rs497976, rs504932, rs538174, rs550014, rs558025, rs558948, rs583664, rs598682, rs606545, rs609148, rs633387, rs636572, rs639855, rs642489, rs644261, rs647192, rs648893, rs650825, rs656905, rs676252, rs677830, rs680787                          | T                            |
| rs548646  | OPRM1 | 6   | 154,459,840 | C            | T            | 0.345            | 1.000                  | flanking 3'UTR                    | NA                             | rs1853384, rs505340, rs548339, rs562859, rs581439, rs582924, rs598160, rs604844, rs612512, rs613355, rs618207, rs619089, rs632457, rs632499, rs648007, rs658156, rs660756, rs671531, rs675026, rs678122, rs681243                                                        | T                            |
| rs3798683 | OPRM1 | 6   | 154,460,107 | G            | A            | 0.157            | 1.000                  | flanking 3'UTR                    | NA                             | NA                                                                                                                                                                                                                                                                       | T                            |
| rs599548  | OPRM1 | 6   | 154,460,254 | G            | A            | 0.136            | 0.998                  | flanking 3'UTR                    | NA                             | rs645027                                                                                                                                                                                                                                                                 | T                            |
| rs9322447 | OPRM1 | 6   | 154,466,013 | G            | A            | 0.483            | 1.000                  | flanking 3'UTR                    | NA                             | rs1323041, rs1323042                                                                                                                                                                                                                                                     | T                            |
| rs618207  | OPRM1 | 6   | 154,466,362 | G            | A            | 0.347            | 1.000                  | flanking 3'UTR                    | NA                             | rs1853384, rs505340, rs548339, rs548646, rs562859, rs581439, rs582924, rs598160, rs604844, rs612512, rs613355, rs619089, rs632457, rs632499, rs648007, rs658156, rs660756, rs671531, rs675026, rs678122, rs681243                                                        | T                            |
| rs1853384 | OPRM1 | 6   | 154,466,651 | C            | T            | 0.347            | 1.000                  | flanking 3'UTR                    | NA                             | rs505340, rs548339, rs548646, rs562859, rs581439, rs582924, rs598160, rs604844, rs612512, rs613355, rs618207, rs619089, rs632457, rs632499, rs648007, rs658156, rs660756, rs671531, rs675026, rs678122, rs681243                                                         | T                            |
| rs623956  | OPRM1 | 6   | 154,471,718 | A            | G            | 0.247            | 0.909                  | flanking 5'UTR                    | NA                             | NA                                                                                                                                                                                                                                                                       | T                            |

**Supplemental Table 3: SNP Information**

| SNP        | Gene  | Chr | Position    | Major Allele | Minor Allele | MAF <sup>a</sup> | Call Rate <sup>b</sup> | Chromosomal Location <sup>c</sup> | Amino Acid Change <sup>d</sup> | LD Bin ( $r^2 > 0.80$ ) <sup>e</sup>                                                                                                                                                                                                                                  | Analysis Sample <sup>f</sup> |
|------------|-------|-----|-------------|--------------|--------------|------------------|------------------------|-----------------------------------|--------------------------------|-----------------------------------------------------------------------------------------------------------------------------------------------------------------------------------------------------------------------------------------------------------------------|------------------------------|
| rs504932   | OPRM1 | 6   | 154,472,161 | A            | G            | 0.245            | 0.998                  | flanking 5'UTR                    | NA                             | rs13194785, rs1323043, rs485399, rs497315, rs497976, rs538174, rs540825, rs550014, rs558025, rs558948, rs583664, rs598682, rs606545, rs609148, rs633387, rs636572, rs639855, rs642489, rs644261, rs647192, rs648893, rs650825, rs656905, rs676252, rs677830, rs680787 | T                            |
| rs609148   | OPRM1 | 6   | 154,472,707 | G            | A            | 0.245            | 1.000                  | flanking 5'UTR                    | NA                             | rs1323043, rs497315, rs497976, rs504932, rs540825, rs550014, rs558025, rs558948, rs583664, rs598682, rs606545, rs633387, rs639855, rs642489, rs644261, rs647192, rs648893, rs650825, rs656905, rs676252, rs677830, rs680787                                           | T                            |
| rs606148   | OPRM1 | 6   | 154,477,679 | C            | A            | 0.101            | 1.000                  | flanking 5'UTR                    | NA                             | rs613341, rs664247, rs6923231                                                                                                                                                                                                                                         | T                            |
| rs632395   | OPRM1 | 6   | 154,478,944 | G            | A            | 0.102            | 1.000                  | flanking 5'UTR                    | NA                             | rs10485057, rs511420, rs544093, rs556716, rs590761, rs599945, rs613341, rs616585, rs617648, rs620496, rs625109, rs628618, rs636433, rs645189, rs649840, rs664247, rs9479756, rs9479757                                                                                | T                            |
| rs648893   | OPRM1 | 6   | 154,480,321 | A            | G            | 0.245            | 0.995                  | flanking 5'UTR                    | NA                             | rs13194785, rs1323043, rs485399, rs497315, rs497976, rs504932, rs538174, rs540825, rs550014, rs558025, rs558948, rs583664, rs598682, rs606545, rs609148, rs633387, rs636572, rs639855, rs642489, rs644261, rs647192, rs650825, rs656905, rs676252, rs677830, rs680787 | T                            |
| rs1323041  | OPRM1 | 6   | 154,480,873 | G            | A            | 0.482            | 0.998                  | flanking 5'UTR                    | NA                             | rs1323042, rs9322447                                                                                                                                                                                                                                                  | T                            |
| rs512053   | OPRM1 | 6   | 154,481,209 | G            | T            | 0.085            | 1.000                  | flanking 5'UTR                    | NA                             | rs679987                                                                                                                                                                                                                                                              | T                            |
| rs642489   | OPRM1 | 6   | 154,484,368 | G            | T            | 0.245            | 1.000                  | flanking 3'UTR                    | NA                             | rs1323043, rs497315, rs497976, rs504932, rs540825, rs550014, rs558025, rs558948, rs583664, rs598682, rs606545, rs609148, rs633387, rs639855, rs644261, rs647192, rs648893, rs650825, rs656905, rs676252, rs677830, rs680787                                           | T                            |
| rs613341   | OPRM1 | 6   | 154,484,971 | C            | T            | 0.096            | 1.000                  | flanking 3'UTR                    | NA                             | rs10485057, rs511420, rs544093, rs556716, rs590761, rs599945, rs606148, rs616585, rs617648, rs620496, rs625109, rs628618, rs632395, rs636433, rs645189, rs664247, rs6923231, rs9479756, rs9479757                                                                     | T                            |
| rs10485058 | OPRM1 | 6   | 154,486,907 | A            | G            | 0.145            | 0.993                  | flanking 3'UTR                    | NA                             | rs9478506                                                                                                                                                                                                                                                             | T                            |
| rs613355   | OPRM1 | 6   | 154,491,542 | A            | C            | 0.348            | 1.000                  | flanking 3'UTR                    | NA                             | rs1853384, rs505340, rs548339, rs548646, rs562859, rs581439, rs582924, rs598160, rs604844, rs612512, rs618207, rs619089, rs632457, rs632499, rs648007, rs658156, rs660756, rs671531, rs678122, rs681243                                                               | T                            |
| rs1561289  | POMC  | 2   | 25,222,544  | C            | T            | 0.247            | 1.000                  | flanking 3'UTR                    | NA                             | rs10180231, rs10188516, rs1561288, rs2118404, rs6713532, rs7605927                                                                                                                                                                                                    | T                            |

**Supplemental Table 3: SNP Information**

| SNP        | Gene    | Chr | Position    | Major Allele | Minor Allele | MAF <sup>a</sup> | Call Rate <sup>b</sup> | Chromosomal Location <sup>c</sup> | Amino Acid Change <sup>d</sup> | LD Bin ( $r^2 > 0.80$ ) <sup>e</sup>                                                        | Analysis Sample <sup>f</sup> |
|------------|---------|-----|-------------|--------------|--------------|------------------|------------------------|-----------------------------------|--------------------------------|---------------------------------------------------------------------------------------------|------------------------------|
| rs13428823 | POMC    | 2   | 25,226,802  | A            | G            | 0.374            | 0.998                  | flanking 3'UTR                    | NA                             | rs1866146                                                                                   | T                            |
| rs3795955  | POMC    | 2   | 25,228,609  | C            | T            | 0.253            | 0.986                  | flanking 3'UTR                    | NA                             | NA                                                                                          | T                            |
| rs2164808  | POMC    | 2   | 25,230,680  | C            | T            | 0.406            | 1.000                  | flanking 3'UTR                    | Y1067Y<br>(XP_039733)          | NA                                                                                          | T                            |
| rs2118404  | POMC    | 2   | 25,230,833  | C            | T            | 0.245            | 1.000                  | flanking 3'UTR                    | NA                             | rs10180231, rs10188516, rs1561288,<br>rs1561289, rs6713532, rs7605927                       | T                            |
| rs7589318  | POMC    | 2   | 25,231,876  | G            | A            | 0.281            | 0.998                  | flanking 3'UTR                    | NA                             | NA                                                                                          | T                            |
| rs1866146  | POMC    | 2   | 25,234,077  | A            | G            | 0.344            | 1.000                  | flanking 3'UTR                    | NA                             | rs13428823                                                                                  | T                            |
| rs12473543 | POMC    | 2   | 25,240,685  | T            | G            | 0.216            | 0.998                  | intron                            | NA                             | NA                                                                                          | T                            |
| rs934778   | POMC    | 2   | 25,242,728  | A            | G            | 0.329            | 1.000                  | intron                            | NA                             | NA                                                                                          | T                            |
| rs3769671  | POMC    | 2   | 25,243,657  | A            | C            | 0.047            | 0.988                  | intron                            | NA                             | NA                                                                                          | NA                           |
| rs6545976  | POMC    | 2   | 25,248,154  | G            | T            | 0.053            | 1.000                  | flanking 5'UTR                    | NA                             | rs6719226                                                                                   | T                            |
| rs4665775  | POMC    | 2   | 25,260,625  | A            | G            | 0.206            | 0.964                  | flanking 5'UTR                    | NA                             | rs4665771, rs4665773, rs4665774, rs874401                                                   | T                            |
| rs12453682 | PPP1R1B | 17  | 35,023,531  | T            | C            | 0.319            | 1.000                  | flanking 5'UTR                    | NA                             | rs1874228                                                                                   | T                            |
| rs1877032  | PPP1R1B | 17  | 35,024,590  | T            | C            | 0.082            | 0.918                  | flanking 5'UTR                    | NA                             | NA                                                                                          | G                            |
| rs1874228  | PPP1R1B | 17  | 35,028,800  | G            | A            | 0.271            | 0.986                  | flanking 5'UTR                    | NA                             | rs12453682, rs9915323, rs9972882                                                            | T                            |
| rs879606   | PPP1R1B | 17  | 35,035,375  | G            | A            | 0.186            | 1.000                  | flanking 5'UTR                    | NA                             | rs2271309, rs3764352, rs907094                                                              | T                            |
| rs1495099  | PPP1R1B | 17  | 35,037,990  | G            | C            | 0.304            | 0.983                  | flanking 5'UTR                    | NA                             | NA                                                                                          | T                            |
| rs907094   | PPP1R1B | 17  | 35,043,897  | A            | G            | 0.252            | 1.000                  | intron                            | NA                             | rs2271309, rs3764352, rs879606                                                              | T                            |
| rs1874224  | PPP1R1B | 17  | 35,049,186  | T            | G            | 0.016            | 1.000                  | intron                            | NA                             | NA                                                                                          | NA                           |
| rs9892427  | PPP1R1B | 17  | 35,058,384  | T            | C            | 0.076            | 1.000                  | intron                            | NA                             | NA                                                                                          | T                            |
| rs9972882  | PPP1R1B | 17  | 35,061,224  | C            | A            | 0.266            | 1.000                  | intron                            | NA                             | rs1874228, rs9915323                                                                        | T                            |
| rs10227616 | PRKAR2B | 7   | 106,462,434 | C            | A            | 0.333            | 1.000                  | flanking 5'UTR                    | NA                             | rs2237648, rs2395833, rs6957586, rs758943                                                   | T                            |
| rs1544582  | PRKAR2B | 7   | 106,475,074 | A            | G            | 0.469            | 1.000                  | intron                            | NA                             | rs1476878, rs1476879, rs2237650,<br>rs2244846, rs2536492, rs2536495, rs997381               | T                            |
| rs2237649  | PRKAR2B | 7   | 106,481,518 | G            | A            | 0.466            | 0.998                  | intron                            | NA                             | rs1476879                                                                                   | T                            |
| rs1476879  | PRKAR2B | 7   | 106,485,977 | T            | A            | 0.468            | 1.000                  | intron                            | NA                             | rs1476878, rs1544582, rs2237649,<br>rs2237650, rs2244846, rs2536492,<br>rs2536495, rs997381 | T                            |
| rs6957586  | PRKAR2B | 7   | 106,489,869 | A            | G            | 0.333            | 0.998                  | intron                            | NA                             | rs10227616, rs2237648, rs2395833,<br>rs758943                                               | T                            |
| rs11766415 | PRKAR2B | 7   | 106,496,001 | A            | G            | 0.428            | 1.000                  | intron                            | NA                             | rs3801969                                                                                   | T                            |
| rs3801969  | PRKAR2B | 7   | 106,498,728 | G            | T            | 0.453            | 1.000                  | intron                            | NA                             | rs11766415                                                                                  | T                            |
| rs2536503  | PRKAR2B | 7   | 106,501,051 | G            | A            | 0.125            | 1.000                  | intron                            | NA                             | rs2536505                                                                                   | T                            |
| rs2536504  | PRKAR2B | 7   | 106,501,141 | C            | T            | 0.338            | 1.000                  | intron                            | NA                             | rs2251838, rs2536501, rs2536502                                                             | T                            |
| rs6960842  | PRKAR2B | 7   | 106,502,556 | C            | G            | 0.417            | 1.000                  | intron                            | NA                             | NA                                                                                          | T                            |

**Supplemental Table 3: SNP Information**

| SNP        | Gene    | Chr | Position    | Major Allele | Minor Allele | MAF <sup>a</sup> | Call Rate <sup>b</sup> | Chromosomal Location <sup>c</sup> | Amino Acid Change <sup>d</sup> | LD Bin ( $r^2 > 0.80$ ) <sup>e</sup>                                                                                                                                                                                                                                                                        | Analysis Sample <sup>f</sup> |
|------------|---------|-----|-------------|--------------|--------------|------------------|------------------------|-----------------------------------|--------------------------------|-------------------------------------------------------------------------------------------------------------------------------------------------------------------------------------------------------------------------------------------------------------------------------------------------------------|------------------------------|
| rs17340577 | PRKAR2B | 7   | 106,506,649 | C            | T            | 0.076            | 0.993                  | intron                            | NA                             | rs1004570, rs10248105, rs10261881, rs10272371, rs11760966, rs11764389, rs11767753, rs11772066, rs12055940, rs12154324, rs17153823, rs17153861, rs17340479, rs17341680, rs17425839, rs1860804, rs1860805, rs2191917, rs2237653, rs2250121, rs2536490, rs3752645, rs6960708, rs7778076, rs7786692, rs8180787  | T                            |
| rs2299419  | PRKAR2B | 7   | 106,506,772 | T            | C            | 0.086            | 1.000                  | intron                            | NA                             | rs10249401, rs2707374, rs9656135                                                                                                                                                                                                                                                                            | T                            |
| rs2251838  | PRKAR2B | 7   | 106,507,403 | A            | G            | 0.345            | 0.998                  | intron                            | NA                             | rs2536501, rs2536502, rs2536504                                                                                                                                                                                                                                                                             | T                            |
| rs12154324 | PRKAR2B | 7   | 106,508,168 | G            | A            | 0.086            | 1.000                  | intron                            | NA                             | rs1004570, rs10248105, rs10261881, rs10272371, rs11760966, rs11764389, rs11767753, rs11772066, rs12055940, rs17153823, rs17153861, rs17340479, rs17340577, rs17341680, rs17425839, rs1860804, rs1860805, rs2191917, rs2237653, rs2250121, rs2536490, rs3752645, rs6960708, rs7778076, rs7786692, rs8180787  | T                            |
| rs7778076  | PRKAR2B | 7   | 106,510,244 | A            | G            | 0.089            | 1.000                  | intron                            | NA                             | rs1004570, rs10248105, rs10261881, rs10272371, rs11760966, rs11764389, rs11767753, rs11772066, rs12055940, rs12154324, rs17153823, rs17153861, rs17340479, rs17340577, rs17341680, rs17425839, rs1860804, rs1860805, rs2191917, rs2237653, rs2250121, rs2536490, rs3752645, rs6960708, rs7786692, rs8180787 | T                            |
| rs6466156  | PRKAR2B | 7   | 106,519,170 | A            | G            | 0.347            | 1.000                  | intron                            | NA                             | NA                                                                                                                                                                                                                                                                                                          | T                            |
| rs6466157  | PRKAR2B | 7   | 106,519,537 | T            | C            | 0.481            | 1.000                  | intron                            | NA                             | rs12667954, rs12674011, rs12705402, rs12705403, rs2237652, rs2237654, rs2237656, rs2283037, rs2302453, rs3735613, rs7809330, rs917760, rs9648946                                                                                                                                                            | T                            |
| rs717099   | PRKAR2B | 7   | 106,528,174 | A            | G            | 0.464            | 0.998                  | intron                            | NA                             | rs10281856, rs13311274, rs6955387                                                                                                                                                                                                                                                                           | T                            |
| rs6955387  | PRKAR2B | 7   | 106,535,275 | G            | C            | 0.388            | 1.000                  | intron                            | NA                             | rs10281856, rs13311274, rs1860803, rs3801968, rs717099                                                                                                                                                                                                                                                      | T                            |
| rs12055940 | PRKAR2B | 7   | 106,538,782 | C            | T            | 0.090            | 1.000                  | intron                            | NA                             | rs1004570, rs10248105, rs10261881, rs10272371, rs11760966, rs11764389, rs11767753, rs11772066, rs12154324, rs17153823, rs17153861, rs17340479, rs17340577, rs17341680, rs17425839, rs1860804, rs1860805, rs2191917, rs2237653, rs2250121, rs2536490, rs3752645, rs6960708, rs7778076, rs7786692, rs8180787  | T                            |



**Supplemental Table 3: SNP Information**

| SNP        | Gene    | Chr | Position    | Major Allele | Minor Allele | MAF <sup>a</sup> | Call Rate <sup>b</sup> | Chromosomal Location <sup>c</sup> | Amino Acid Change <sup>d</sup> | LD Bin ( $r^2 > 0.80$ ) <sup>e</sup>                                                                                                                                                                                                                                                                                   | Analysis Sample <sup>f</sup> |
|------------|---------|-----|-------------|--------------|--------------|------------------|------------------------|-----------------------------------|--------------------------------|------------------------------------------------------------------------------------------------------------------------------------------------------------------------------------------------------------------------------------------------------------------------------------------------------------------------|------------------------------|
| rs2250121  | PRKAR2B | 7   | 106,540,484 | A            | G            | 0.091            | 1.000                  | intron                            | NA                             | rs1004570, rs10248105, rs10261881, rs10272371, rs11760966, rs11764389, rs11767753, rs11772066, rs12055940, rs12154324, rs17153823, rs17153861, rs17340479, rs17340577, rs17341680, rs17425839, rs1860804, rs1860805, rs2191917, rs2237653, rs2536490, rs3752645, rs6960708, rs7778076, rs7786692, rs8180787            | T                            |
| rs2237652  | PRKAR2B | 7   | 106,547,212 | T            | C            | 0.482            | 1.000                  | intron                            | NA                             | rs12667954, rs12674011, rs12705402, rs12705403, rs2237654, rs2237656, rs2283037, rs2302453, rs3735613, rs6466157, rs7809330, rs917760, rs9648946                                                                                                                                                                       | T                            |
| rs9656135  | PRKAR2B | 7   | 106,555,592 | C            | T            | 0.077            | 1.000                  | intron                            | NA                             | rs10249401, rs2299419, rs2707374                                                                                                                                                                                                                                                                                       | T                            |
| rs17153861 | PRKAR2B | 7   | 106,556,875 | G            | A            | 0.089            | 1.000                  | intron                            | NA                             | rs1004570, rs10248105, rs10261881, rs10272371, rs11760966, rs11764389, rs11767753, rs11772066, rs12055940, rs12154324, rs17153823, rs17340479, rs17340577, rs17341680, rs17425839, rs1860804, rs1860805, rs2191917, rs2237653, rs2250121, rs2536490, rs3752645, rs6960708, rs7778076, rs7786692, rs8180787             | T                            |
| rs2191917  | PRKAR2B | 7   | 106,560,944 | T            | G            | 0.090            | 1.000                  | intron                            | NA                             | rs1004570, rs10248105, rs10261881, rs10272371, rs11760966, rs11764389, rs11767753, rs11772066, rs12055940, rs12154324, rs17153823, rs17153861, rs17340479, rs17340577, rs17341680, rs17425839, rs1860804, rs1860805, rs2191917, rs2237653, rs2250121, rs2536490, rs3752645, rs6960708, rs7778076, rs7786692, rs8180787 | T                            |
| rs1860803  | PRKAR2B | 7   | 106,567,076 | T            | G            | 0.407            | 0.995                  | intron                            | NA                             | rs10281856, rs11760261, rs13311274, rs3801968, rs6955387                                                                                                                                                                                                                                                               | T                            |
| rs3729876  | PRKAR2B | 7   | 106,574,188 | C            | T            | 0.180            | 1.000                  | intron                            | NA                             | rs10253172, rs10253291, rs11767623, rs12705405, rs1981696, rs257373, rs257375, rs257377, rs257378, rs257382, rs257387, rs3729877, rs6466160, rs6946931, rs6947857, rs6960148, rs6977868, rs975935                                                                                                                      | T                            |
| rs6977868  | PRKAR2B | 7   | 106,577,791 | G            | T            | 0.175            | 1.000                  | intron                            | NA                             | rs10253172, rs10253291, rs11767623, rs12705405, rs1981696, rs257373, rs257375, rs257377, rs257378, rs257382, rs257387, rs3729876, rs3729877, rs3779500, rs6466160, rs6946931, rs6947857, rs6960148, rs975935                                                                                                           | T                            |

**Supplemental Table 3: SNP Information**

| SNP        | Gene    | Chr | Position    | Major Allele | Minor Allele | MAF <sup>a</sup> | Call Rate <sup>b</sup> | Chromosomal Location <sup>c</sup> | Amino Acid Change <sup>d</sup> | LD Bin ( $r^2 > 0.80$ ) <sup>e</sup>                                                                                                                                                               | Analysis Sample <sup>f</sup> |
|------------|---------|-----|-------------|--------------|--------------|------------------|------------------------|-----------------------------------|--------------------------------|----------------------------------------------------------------------------------------------------------------------------------------------------------------------------------------------------|------------------------------|
| rs11767623 | PRKAR2B | 7   | 106,579,568 | T            | C            | 0.179            | 1.000                  | intron                            | NA                             | rs10253172, rs10253291, rs12705405, rs1981696, rs257373, rs257375, rs257377, rs257378, rs257382, rs257387, rs3729876, rs3729877, rs6466160, rs6946931, rs6947857, rs6960148, rs6977868, rs975935   | T                            |
| rs12705406 | PRKAR2B | 7   | 106,579,790 | G            | A            | 0.126            | 1.000                  | intron                            | NA                             | rs3779500                                                                                                                                                                                          | T                            |
| rs257384   | PRKAR2B | 7   | 106,592,630 | C            | T            | 0.453            | 1.000                  | flanking 3'UTR                    | NA                             | rs2395836, rs257376                                                                                                                                                                                | T                            |
| rs257387   | PRKAR2B | 7   | 106,595,716 | G            | A            | 0.176            | 1.000                  | flanking 5'UTR                    | NA                             | rs10253172, rs10253291, rs11767623, rs12705405, rs1981696, rs257373, rs257375, rs257377, rs257378, rs257382, rs3729876, rs3729877, rs6466160, rs6946931, rs6947857, rs6960148, rs6977868, rs975935 | T                            |
| rs760973   | PRKCABP | 22  | 36,777,212  | A            | C            | 0.438            | 1.000                  | flanking 5'UTR                    | NA                             | rs4384887, rs4821731, rs4821733, rs5756890, rs742395                                                                                                                                               | T                            |
| rs4821733  | PRKCABP | 22  | 36,779,340  | A            | G            | 0.436            | 1.000                  | flanking 5'UTR                    | NA                             | rs2018980, rs2076369, rs2076370, rs4384887, rs4821731, rs4821735, rs5756890, rs6000991, rs738443, rs742395, rs742396, rs760973                                                                     | T                            |
| rs737662   | PRKCABP | 22  | 36,782,311  | C            | G            | 0.305            | 0.986                  | flanking 5'UTR                    | NA                             | NA                                                                                                                                                                                                 | T                            |
| rs3952     | PRKCABP | 22  | 36,786,544  | A            | G            | 0.314            | 1.000                  | intron                            | NA                             | rs3026685, rs3948                                                                                                                                                                                  | T                            |
| rs2076370  | PRKCABP | 22  | 36,793,914  | G            | A            | 0.390            | 0.988                  | intron                            | NA                             | rs1004764, rs2018980, rs2076369, rs4821733, rs4821735, rs6000991, rs738443, rs742396                                                                                                               | T                            |
| rs760975   | PRKCABP | 22  | 36,797,730  | C            | G            | 0.393            | 0.993                  | intron                            | NA                             | NA                                                                                                                                                                                                 | T                            |
| rs7289911  | PRKCABP | 22  | 36,798,578  | G            | A            | 0.028            | 1.000                  | intron                            | NA                             | NA                                                                                                                                                                                                 | NA                           |
| rs2012859  | PRKCABP | 22  | 36,803,652  | G            | A            | 0.299            | 0.998                  | flanking 3'UTR                    | NA                             | rs13053681, rs3026688                                                                                                                                                                              | T                            |
| rs2076371  | PRKCABP | 22  | 36,804,642  | G            | A            | 0.295            | 1.000                  | coding                            | V405A (NP_037488)              | NA                                                                                                                                                                                                 | T                            |
| rs1004764  | PRKCABP | 22  | 36,804,798  | A            | G            | 0.393            | 0.998                  | intron                            | NA                             | rs2018980, rs2076369, rs2076370, rs4821735, rs6000991, rs738443, rs742396                                                                                                                          | T                            |
| rs2076372  | PRKCABP | 22  | 36,804,911  | C            | T            | 0.257            | 0.995                  | intron                            | NA                             | NA                                                                                                                                                                                                 | T                            |
| rs8135665  | PRKCABP | 22  | 36,806,222  | C            | T            | 0.200            | 0.988                  | intron                            | NA                             | NA                                                                                                                                                                                                 | G                            |
| rs5756908  | PRKCABP | 22  | 36,806,525  | C            | T            | 0.480            | 1.000                  | intron                            | NA                             | rs2235573                                                                                                                                                                                          | T                            |
| rs2267366  | PRKCABP | 22  | 36,810,605  | T            | C            | 0.163            | 1.000                  | flanking 3'UTR                    | NA                             | NA                                                                                                                                                                                                 | T                            |
| rs27074    | SLC6A3  | 5   | 1,436,550   | C            | T            | 0.108            | 1.000                  | flanking 3'UTR                    | NA                             | NA                                                                                                                                                                                                 | T                            |
| rs11133762 | SLC6A3  | 5   | 1,444,161   | C            | T            | 0.011            | 0.995                  | flanking 3'UTR                    | NA                             | NA                                                                                                                                                                                                 | NA                           |
| rs10064525 | SLC6A3  | 5   | 1,445,721   | T            | G            | 0.063            | 0.990                  | flanking 3'UTR                    | NA                             | NA                                                                                                                                                                                                 | T                            |
| rs40184    | SLC6A3  | 5   | 1,448,077   | C            | T            | 0.461            | 0.993                  | intron                            | NA                             | NA                                                                                                                                                                                                 | T                            |
| rs11564767 | SLC6A3  | 5   | 1,457,704   | A            | T            | 0.064            | 1.000                  | intron                            | NA                             | rs11564764, rs11564765, rs6869645, rs6876225                                                                                                                                                       | T                            |
| rs11564764 | SLC6A3  | 5   | 1,458,806   | C            | T            | 0.054            | 1.000                  | intron                            | NA                             | rs11564765, rs11564767, rs11564772, rs6869645, rs6876225                                                                                                                                           | T                            |

**Supplemental Table 3: SNP Information**

| SNP        | Gene   | Chr | Position   | Major Allele | Minor Allele | MAF <sup>a</sup> | Call Rate <sup>b</sup> | Chromosomal Location <sup>c</sup> | Amino Acid Change <sup>d</sup> | LD Bin ( $r^2 > 0.80$ ) <sup>e</sup>                                                                                                                                                                                                                                                                                      | Analysis Sample <sup>f</sup> |
|------------|--------|-----|------------|--------------|--------------|------------------|------------------------|-----------------------------------|--------------------------------|---------------------------------------------------------------------------------------------------------------------------------------------------------------------------------------------------------------------------------------------------------------------------------------------------------------------------|------------------------------|
| rs3776511  | SLC6A3 | 5   | 1,460,129  | C            | T            | 0.207            | 0.940                  | intron                            | NA                             | rs3776512, rs8179029                                                                                                                                                                                                                                                                                                      | G                            |
| rs6347     | SLC6A3 | 5   | 1,464,412  | T            | C            | 0.267            | 0.978                  | coding                            | S405S<br>(NP_001035)           | NA                                                                                                                                                                                                                                                                                                                        | G                            |
| rs37022    | SLC6A3 | 5   | 1,468,629  | A            | T            | 0.148            | 0.998                  | intron                            | NA                             | NA                                                                                                                                                                                                                                                                                                                        | T                            |
| rs10040882 | SLC6A3 | 5   | 1,471,558  | C            | T            | 0.227            | 0.986                  | intron                            | NA                             | rs10052016, rs10053602, rs2042449                                                                                                                                                                                                                                                                                         | T                            |
| rs2975292  | SLC6A3 | 5   | 1,472,932  | G            | C            | 0.345            | 0.935                  | intron                            | NA                             | NA                                                                                                                                                                                                                                                                                                                        | G                            |
| rs458334   | SLC6A3 | 5   | 1,483,093  | A            | G            | 0.423            | 1.000                  | intron                            | NA                             | rs250681, rs250686, rs37020, rs420422, rs464049                                                                                                                                                                                                                                                                           | T                            |
| rs456082   | SLC6A3 | 5   | 1,483,515  | A            | G            | 0.188            | 0.990                  | intron                            | NA                             | rs250682, rs393795, rs409588, rs456774, rs458860, rs460000, rs460700, rs463379, rs464061                                                                                                                                                                                                                                  | T                            |
| rs11737901 | SLC6A3 | 5   | 1,483,616  | C            | T            | 0.335            | 0.998                  | intron                            | NA                             | rs1048953, rs11564758, rs4975646                                                                                                                                                                                                                                                                                          | T                            |
| rs409588   | SLC6A3 | 5   | 1,483,834  | G            | T            | 0.187            | 1.000                  | intron                            | NA                             | rs250682, rs393795, rs456082, rs456774, rs458860, rs460000, rs460700, rs463379, rs464061                                                                                                                                                                                                                                  | T                            |
| rs4975646  | SLC6A3 | 5   | 1,486,401  | G            | A            | 0.357            | 1.000                  | intron                            | NA                             | rs11564758, rs11737901, rs13161905                                                                                                                                                                                                                                                                                        | T                            |
| rs403636   | SLC6A3 | 5   | 1,491,354  | C            | A            | 0.169            | 1.000                  | intron                            | NA                             | rs40358                                                                                                                                                                                                                                                                                                                   | T                            |
| rs6350     | SLC6A3 | 5   | 1,496,199  | G            | A            | 0.060            | 1.000                  | coding                            | N38N<br>(NP_001035)            | NA                                                                                                                                                                                                                                                                                                                        | T                            |
| rs11564753 | SLC6A3 | 5   | 1,496,990  | C            | T            | 0.205            | 1.000                  | intron                            | NA                             | NA                                                                                                                                                                                                                                                                                                                        | T                            |
| rs11564752 | SLC6A3 | 5   | 1,497,985  | C            | A            | 0.057            | 0.942                  | intron                            | NA                             | NA                                                                                                                                                                                                                                                                                                                        | T                            |
| rs2975226  | SLC6A3 | 5   | 1,498,616  | T            | A            | 0.389            | 0.909                  | flanking 5'UTR                    | NA                             | NA                                                                                                                                                                                                                                                                                                                        | T                            |
| rs2652511  | SLC6A3 | 5   | 1,499,389  | G            | A            | 0.387            | 0.988                  | flanking 5'UTR                    | NA                             | NA                                                                                                                                                                                                                                                                                                                        | T                            |
| rs6413429  | SLC6A3 | 5   | 1,500,027  | C            | A            | 0.060            | 1.000                  | flanking 5'UTR                    | NA                             | NA                                                                                                                                                                                                                                                                                                                        | T                            |
| rs2652510  | SLC6A3 | 5   | 1,500,860  | T            | C            | 0.398            | 0.995                  | flanking 5'UTR                    | NA                             | NA                                                                                                                                                                                                                                                                                                                        | T                            |
| rs3756450  | SLC6A3 | 5   | 1,501,148  | A            | G            | 0.110            | 1.000                  | flanking 5'UTR                    | NA                             | rs12654851                                                                                                                                                                                                                                                                                                                | T                            |
| rs12652860 | SLC6A3 | 5   | 1,506,772  | C            | A            | 0.284            | 1.000                  | flanking 3'UTR                    | NA                             | NA                                                                                                                                                                                                                                                                                                                        | T                            |
| rs356219   | SNCA   | 4   | 90,856,624 | A            | G            | 0.375            | 1.000                  | flanking 3'UTR                    | NA                             | rs356165, rs356220                                                                                                                                                                                                                                                                                                        | T                            |
| rs11931074 | SNCA   | 4   | 90,858,538 | G            | T            | 0.084            | 1.000                  | flanking 3'UTR                    | NA                             | rs6532190, rs10003708, rs10033209, rs10516845, rs11944331, rs17016071, rs17016188, rs17016193, rs17016235, rs3756054, rs3775423, rs3822090, rs3857051, rs3857052, rs3857057, rs3857059, rs4031753, rs6834765, rs7436973, rs7655792, rs7661330, rs7675290, rs7681312, rs7681815, rs7690873, rs8180209, rs8180214, rs894278 | T                            |
| rs356220   | SNCA   | 4   | 90,860,363 | C            | T            | 0.355            | 0.837                  | flanking 3'UTR                    | NA                             | rs356168, rs2736990, rs356165, rs356200, rs356204, rs356219, rs356221                                                                                                                                                                                                                                                     | T                            |

**Supplemental Table 3: SNP Information**

| SNP        | Gene | Chr | Position   | Major Allele | Minor Allele | MAF <sup>a</sup> | Call Rate <sup>b</sup> | Chromosomal Location <sup>c</sup> | Amino Acid Change <sup>d</sup> | LD Bin ( $r^2 > 0.80$ ) <sup>e</sup>                                                                                                                                                                                                                                                                                       | Analysis Sample <sup>f</sup> |
|------------|------|-----|------------|--------------|--------------|------------------|------------------------|-----------------------------------|--------------------------------|----------------------------------------------------------------------------------------------------------------------------------------------------------------------------------------------------------------------------------------------------------------------------------------------------------------------------|------------------------------|
| rs10003708 | SNCA | 4   | 90,862,074 | C            | A            | 0.084            | 1.000                  | flanking 3'UTR                    | NA                             | rs6532190, rs10033209, rs10516845, rs11931074, rs11944331, rs17016071, rs17016188, rs17016193, rs17016235, rs3756054, rs3775423, rs3822090, rs3857051, rs3857052, rs3857057, rs3857059, rs4031753, rs6834765, rs7436973, rs7655792, rs7661330, rs7675290, rs7681312, rs7681815, rs7690873, rs8180209, rs8180214, rs894278  | T                            |
| rs168552   | SNCA | 4   | 90,862,167 | T            | C            | 0.290            | 0.995                  | flanking 3'UTR                    | NA                             | rs2572324, rs356222                                                                                                                                                                                                                                                                                                        | T                            |
| rs3857051  | SNCA | 4   | 90,862,720 | A            | G            | 0.084            | 1.000                  | flanking 3'UTR                    | NA                             | rs6532190, rs10003708, rs10033209, rs10516845, rs11931074, rs11944331, rs17016071, rs17016193, rs17016235, rs3756054, rs3775423, rs3822090, rs3857052, rs3857057, rs3857059, rs4031753, rs6834765, rs7436973, rs7655792, rs7661330, rs7675290, rs7681312, rs7681815, rs7690873, rs8180209, rs8180214, rs894278             | T                            |
| rs356165   | SNCA | 4   | 90,865,909 | A            | G            | 0.402            | 0.945                  | 3'UTR                             | NA                             | rs356168, rs2736990, rs356200, rs356204, rs356219, rs356220, rs356221                                                                                                                                                                                                                                                      | G                            |
| rs10033209 | SNCA | 4   | 90,872,727 | T            | G            | 0.084            | 0.995                  | intron                            | NA                             | rs6532190, rs10003708, rs10516845, rs11931074, rs11944331, rs17016071, rs17016193, rs17016235, rs3756054, rs3775423, rs3822090, rs3857051, rs3857052, rs3857057, rs3857059, rs4031753, rs6834765, rs7436973, rs7655792, rs7661330, rs7675290, rs7681312, rs7681815, rs7690873, rs8180209, rs8180214, rs894278              | T                            |
| rs3775423  | SNCA | 4   | 90,876,514 | C            | T            | 0.083            | 0.998                  | intron                            | NA                             | rs6532190, rs10003708, rs10033209, rs10516845, rs11931074, rs11944331, rs17016071, rs17016188, rs17016193, rs17016235, rs3756054, rs3822090, rs3857051, rs3857052, rs3857057, rs3857059, rs4031753, rs6834765, rs7436973, rs7655792, rs7661330, rs7675290, rs7681312, rs7681815, rs7690873, rs8180209, rs8180214, rs894278 | T                            |
| rs356204   | SNCA | 4   | 90,882,565 | C            | T            | 0.432            | 0.938                  | intron                            | NA                             | rs356168, rs2736990, rs2737029, rs356165, rs356200, rs356220, rs356221                                                                                                                                                                                                                                                     | T                            |
| rs356203   | SNCA | 4   | 90,885,064 | T            | C            | 0.376            | 1.000                  | intron                            | NA                             | NA                                                                                                                                                                                                                                                                                                                         | T                            |
| rs356168   | SNCA | 4   | 90,893,454 | A            | G            | 0.457            | 1.000                  | intron                            | NA                             | rs2736990, rs2737029, rs356165, rs356200, rs356204, rs356220, rs356221                                                                                                                                                                                                                                                     | T                            |

**Supplemental Table 3: SNP Information**

| SNP        | Gene | Chr | Position   | Major Allele | Minor Allele | MAF <sup>a</sup> | Call Rate <sup>b</sup> | Chromosomal Location <sup>c</sup> | Amino Acid Change <sup>d</sup> | LD Bin ( $r^2 > 0.80$ ) <sup>e</sup>                                                                                                                                                                                                                                                                                                                                                                                                                                                                                                                                                          | Analysis Sample <sup>f</sup> |
|------------|------|-----|------------|--------------|--------------|------------------|------------------------|-----------------------------------|--------------------------------|-----------------------------------------------------------------------------------------------------------------------------------------------------------------------------------------------------------------------------------------------------------------------------------------------------------------------------------------------------------------------------------------------------------------------------------------------------------------------------------------------------------------------------------------------------------------------------------------------|------------------------------|
| rs356198   | SNCA | 4   | 90,901,527 | C            | T            | 0.204            | 0.998                  | intron                            | NA                             | rs10011157, rs1442144, rs1471484, rs1811442, rs1837891, rs2197120, rs2572318, rs2583968, rs2583975, rs2583978, rs2619349, rs2619355, rs2619368, rs2737025, rs3113355, rs356188, rs356191, rs972880                                                                                                                                                                                                                                                                                                                                                                                            | T                            |
| rs6834765  | SNCA | 4   | 90,903,013 | T            | C            | 0.079            | 1.000                  | intron                            | NA                             | rs6532190, rs10003708, rs10033209, rs10516845, rs11931074, rs11944331, rs17016071, rs17016188, rs17016193, rs17016235, rs3756054, rs3775423, rs3822090, rs3857051, rs3857052, rs3857057, rs3857059, rs4031753, rs7436973, rs7655792, rs7661330, rs7675290, rs7681312, rs7681815, rs7690873, rs8180209, rs8180214, rs894278                                                                                                                                                                                                                                                                    | T                            |
| rs356164   | SNCA | 4   | 90,912,499 | C            | G            | 0.162            | 1.000                  | intron                            | NA                             | rs356186                                                                                                                                                                                                                                                                                                                                                                                                                                                                                                                                                                                      | T                            |
| rs3822090  | SNCA | 4   | 90,923,899 | C            | T            | 0.126            | 1.000                  | intron                            | NA                             | rs6532190, rs10003708, rs10033209, rs10516845, rs11931074, rs17016071, rs17016193, rs17016235, rs3756054, rs3775423, rs3775439, rs3857051, rs3857052, rs3857057, rs3857059, rs4031753, rs6834765, rs7436973, rs7655792, rs7661330, rs7675290, rs7681312, rs7681815, rs7690873, rs8180209, rs8180214, rs894278                                                                                                                                                                                                                                                                                 | T                            |
| rs2737033  | SNCA | 4   | 90,926,970 | T            | C            | 0.273            | 1.000                  | intron                            | NA                             | rs13148411, rs1442146, rs1442147, rs2583958, rs2583959, rs2583965, rs2583966, rs2583969, rs2583970, rs2583971, rs2583973, rs2583974, rs2583977, rs2583980, rs2583981, rs2583983, rs2583984, rs2583985, rs2583987, rs2619350, rs2619353, rs2619354, rs2619358, rs2619360, rs2619361, rs2619364, rs2619367, rs2619371, rs2619373, rs2736995, rs2736998, rs2736999, rs2737000, rs2737001, rs2737006, rs2737008, rs2737009, rs2737012, rs2737013, rs2737014, rs2737015, rs2737022, rs2737023, rs2737024, rs356163, rs356184, rs356187, rs356189, rs356192, rs356195, rs986609, rs986610, rs990088 | T                            |
| rs2737029  | SNCA | 4   | 90,930,793 | T            | C            | 0.399            | 1.000                  | intron                            | NA                             | rs356168, rs2736990, rs356200, rs356204, rs356221                                                                                                                                                                                                                                                                                                                                                                                                                                                                                                                                             | T                            |
| rs10002435 | SNCA | 4   | 90,931,534 | G            | A            | 0.113            | 0.998                  | intron                            | NA                             | rs10014396                                                                                                                                                                                                                                                                                                                                                                                                                                                                                                                                                                                    | T                            |
| rs3775443  | SNCA | 4   | 90,934,697 | T            | G            | 0.062            | 1.000                  | intron                            | NA                             | rs17016190                                                                                                                                                                                                                                                                                                                                                                                                                                                                                                                                                                                    | T                            |

**Supplemental Table 3: SNP Information**

| SNP        | Gene | Chr | Position   | Major Allele | Minor Allele | MAF <sup>a</sup> | Call Rate <sup>b</sup> | Chromosomal Location <sup>c</sup> | Amino Acid Change <sup>d</sup> | LD Bin ( $r^2 > 0.80$ ) <sup>e</sup>                                                                                                                                                                                                                                                                                                                                                                                                                                                                                                                                                           | Analysis Sample <sup>f</sup> |
|------------|------|-----|------------|--------------|--------------|------------------|------------------------|-----------------------------------|--------------------------------|------------------------------------------------------------------------------------------------------------------------------------------------------------------------------------------------------------------------------------------------------------------------------------------------------------------------------------------------------------------------------------------------------------------------------------------------------------------------------------------------------------------------------------------------------------------------------------------------|------------------------------|
| rs6532190  | SNCA | 4   | 90,938,219 | A            | T            | 0.064            | 1.000                  | intron                            | NA                             | rs10003708, rs10033209, rs10516845, rs11931074, rs11944331, rs17016071, rs17016188, rs17016193, rs17016235, rs17016274, rs3756054, rs3775423, rs3822090, rs3857051, rs3857052, rs3857057, rs3857059, rs4031753, rs6834765, rs7436973, rs7655792, rs7661330, rs7675290, rs7681312, rs7681815, rs7690873, rs8180209, rs8180214, rs894278                                                                                                                                                                                                                                                         | T                            |
| rs2583958  | SNCA | 4   | 90,939,388 | T            | C            | 0.272            | 1.000                  | intron                            | NA                             | rs13148411, rs1442146, rs1442147, rs2028535, rs2583959, rs2583965, rs2583966, rs2583969, rs2583970, rs2583971, rs2583973, rs2583974, rs2583977, rs2583980, rs2583981, rs2583983, rs2583984, rs2583985, rs2583987, rs2619350, rs2619353, rs2619354, rs2619358, rs2619360, rs2619361, rs2619364, rs2619367, rs2619371, rs2619373, rs2736995, rs2736998, rs2736999, rs2737000, rs2737001, rs2737006, rs2737008, rs2737009, rs2737012, rs2737013, rs2737014, rs2737015, rs2737022, rs2737023, rs2737024, rs2737033, rs356163, rs356184, rs356189, rs356192, rs356195, rs986609, rs986610, rs990088 | T                            |
| rs17016188 | SNCA | 4   | 90,940,903 | T            | C            | 0.064            | 1.000                  | intron                            | NA                             | rs6532190, rs10003708, rs10516845, rs11931074, rs11944331, rs17016071, rs17016193, rs17016235, rs3756054, rs3775423, rs3857052, rs3857057, rs3857059, rs4031753, rs6834765, rs7436973, rs7655792, rs7661330, rs7675290, rs7681312, rs7681815, rs7690873, rs8180209, rs8180214, rs894278                                                                                                                                                                                                                                                                                                        | T                            |

**Supplemental Table 3: SNP Information**

| SNP        | Gene | Chr | Position   | Major Allele | Minor Allele | MAF <sup>a</sup> | Call Rate <sup>b</sup> | Chromosomal Location <sup>c</sup> | Amino Acid Change <sup>d</sup> | LD Bin ( $r^2 > 0.80$ ) <sup>e</sup>                                                                                                                                                                                                                                                                                                                                                                                                                                                                                                                                                           | Analysis Sample <sup>f</sup> |
|------------|------|-----|------------|--------------|--------------|------------------|------------------------|-----------------------------------|--------------------------------|------------------------------------------------------------------------------------------------------------------------------------------------------------------------------------------------------------------------------------------------------------------------------------------------------------------------------------------------------------------------------------------------------------------------------------------------------------------------------------------------------------------------------------------------------------------------------------------------|------------------------------|
| rs2619373  | SNCA | 4   | 90,941,456 | G            | A            | 0.272            | 1.000                  | intron                            | NA                             | rs13148411, rs1442146, rs1442147, rs2028535, rs2583958, rs2583959, rs2583965, rs2583966, rs2583969, rs2583970, rs2583971, rs2583973, rs2583974, rs2583977, rs2583980, rs2583981, rs2583983, rs2583984, rs2583985, rs2583987, rs2619350, rs2619353, rs2619354, rs2619358, rs2619360, rs2619361, rs2619364, rs2619367, rs2619371, rs2736995, rs2736998, rs2736999, rs2737000, rs2737001, rs2737006, rs2737008, rs2737009, rs2737012, rs2737013, rs2737014, rs2737015, rs2737022, rs2737023, rs2737024, rs2737033, rs356163, rs356184, rs356189, rs356192, rs356195, rs986609, rs986610, rs990088 | T                            |
| rs17016190 | SNCA | 4   | 90,941,855 | A            | G            | 0.062            | 1.000                  | intron                            | NA                             | rs3775443                                                                                                                                                                                                                                                                                                                                                                                                                                                                                                                                                                                      | T                            |
| rs961386   | SNCA | 4   | 90,951,826 | A            | T            | 0.013            | 1.000                  | intron                            | NA                             | NA                                                                                                                                                                                                                                                                                                                                                                                                                                                                                                                                                                                             | NA                           |
| rs3822095  | SNCA | 4   | 90,955,540 | T            | C            | 0.371            | 1.000                  | intron                            | NA                             | rs10009760, rs10155475, rs11097234, rs11097238, rs12502363, rs2119787, rs2870028, rs3796664, rs3910104, rs6848726, rs7356228, rs765517, rs7678651                                                                                                                                                                                                                                                                                                                                                                                                                                              | T                            |
| rs2619372  | SNCA | 4   | 90,955,750 | G            | A            | 0.294            | 1.000                  | intron                            | NA                             | rs1442143, rs1837890, rs2619349, rs2737020, rs972880                                                                                                                                                                                                                                                                                                                                                                                                                                                                                                                                           | T                            |
| rs1812923  | SNCA | 4   | 90,958,562 | C            | A            | 0.434            | 1.000                  | intron                            | NA                             | rs10005233, rs1471483, rs6532191, rs7681440, rs974711                                                                                                                                                                                                                                                                                                                                                                                                                                                                                                                                          | T                            |
| rs2737020  | SNCA | 4   | 90,959,901 | A            | G            | 0.294            | 1.000                  | intron                            | NA                             | rs1442143, rs1837890, rs2619349, rs2619372, rs972880                                                                                                                                                                                                                                                                                                                                                                                                                                                                                                                                           | T                            |
| rs7356228  | SNCA | 4   | 90,962,878 | C            | G            | 0.371            | 0.998                  | intron                            | NA                             | rs10009760, rs10155475, rs11097234, rs11097238, rs12502363, rs2119787, rs2870028, rs3796664, rs3822095, rs3910104, rs6848726, rs765517, rs7678651                                                                                                                                                                                                                                                                                                                                                                                                                                              | T                            |

**Supplemental Table 3: SNP Information**

| SNP       | Gene | Chr | Position   | Major Allele | Minor Allele | MAF <sup>a</sup> | Call Rate <sup>b</sup> | Chromosomal Location <sup>c</sup> | Amino Acid Change <sup>d</sup> | LD Bin ( $r^2 > 0.80$ ) <sup>e</sup>                                                                                                                                                                                                                                                                                                                                                                                                                                                                                                                                                                      | Analysis Sample <sup>f</sup> |
|-----------|------|-----|------------|--------------|--------------|------------------|------------------------|-----------------------------------|--------------------------------|-----------------------------------------------------------------------------------------------------------------------------------------------------------------------------------------------------------------------------------------------------------------------------------------------------------------------------------------------------------------------------------------------------------------------------------------------------------------------------------------------------------------------------------------------------------------------------------------------------------|------------------------------|
| rs2737015 | SNCA | 4   | 90,964,306 | T            | C            | 0.270            | 1.000                  | intron                            | NA                             | rs13148411, rs1442146, rs1442147, rs2028535, rs2583958, rs2583959, rs2583965, rs2583966, rs2583969, rs2583970, rs2583971, rs2583973, rs2583974, rs2583977, rs2583980, rs2583981, rs2583983, rs2583984, rs2583985, rs2583987, rs2583988, rs2619350, rs2619353, rs2619354, rs2619358, rs2619360, rs2619361, rs2619364, rs2619367, rs2619371, rs2619373, rs2736995, rs2736998, rs2736999, rs2737000, rs2737001, rs2737006, rs2737008, rs2737009, rs2737012, rs2737013, rs2737014, rs2737022, rs2737023, rs2737024, rs2737033, rs356163, rs356184, rs356189, rs356192, rs356195, rs986609, rs986610, rs990088 | T                            |
| rs3113355 | SNCA | 4   | 90,964,368 | T            | A            | 0.233            | 1.000                  | intron                            | NA                             | rs356198, rs10011157, rs1442144, rs1471484, rs1811442, rs1837891, rs2197120, rs2572318, rs2583968, rs2583975, rs2583978, rs2619349, rs2619355, rs2619368, rs2737025, rs356188, rs356191, rs972880                                                                                                                                                                                                                                                                                                                                                                                                         | T                            |
| rs6532191 | SNCA | 4   | 90,964,953 | C            | T            | 0.496            | 1.000                  | intron                            | NA                             | rs1812923, rs10005233, rs1372522, rs1471483, rs2301134, rs7681440, rs7687945, rs974711                                                                                                                                                                                                                                                                                                                                                                                                                                                                                                                    | T                            |
| rs2583975 | SNCA | 4   | 90,967,511 | C            | T            | 0.225            | 1.000                  | intron                            | NA                             | rs356198, rs10011157, rs1442144, rs1471484, rs1811442, rs1837891, rs2197120, rs2572318, rs2583968, rs2583978, rs2619349, rs2619355, rs2619368, rs2737025, rs3113355, rs356186, rs356188, rs356191, rs972880                                                                                                                                                                                                                                                                                                                                                                                               | T                            |



**Supplemental Table 3: SNP Information**

| SNP        | Gene | Chr | Position    | Major Allele | Minor Allele | MAF <sup>a</sup> | Call Rate <sup>b</sup> | Chromosomal Location <sup>c</sup> | Amino Acid Change <sup>d</sup> | LD Bin ( $r^2 > 0.80$ ) <sup>e</sup>                                                                                                                                                                                                                                                                                                                                                                                                                                                                                                                                                                      | Analysis Sample <sup>f</sup> |
|------------|------|-----|-------------|--------------|--------------|------------------|------------------------|-----------------------------------|--------------------------------|-----------------------------------------------------------------------------------------------------------------------------------------------------------------------------------------------------------------------------------------------------------------------------------------------------------------------------------------------------------------------------------------------------------------------------------------------------------------------------------------------------------------------------------------------------------------------------------------------------------|------------------------------|
| rs13148411 | SNCA | 4   | 90,969,745  | A            | G            | 0.271            | 1.000                  | flanking 5'UTR                    | NA                             | rs1442146, rs1442147, rs2028535, rs2583958, rs2583959, rs2583965, rs2583966, rs2583969, rs2583970, rs2583971, rs2583973, rs2583974, rs2583977, rs2583980, rs2583981, rs2583983, rs2583984, rs2583985, rs2583987, rs2583988, rs2619350, rs2619353, rs2619354, rs2619358, rs2619360, rs2619361, rs2619364, rs2619367, rs2619371, rs2619373, rs2736995, rs2736998, rs2736999, rs2737000, rs2737001, rs2737006, rs2737008, rs2737009, rs2737012, rs2737013, rs2737014, rs2737015, rs2737022, rs2737023, rs2737024, rs2737033, rs356163, rs356184, rs356189, rs356192, rs356195, rs986609, rs986610, rs990088  | T                            |
| rs10011157 | SNCA | 4   | 90,969,867  | T            | C            | 0.231            | 0.995                  | flanking 5'UTR                    | NA                             | rs356198, rs1372519, rs1442144, rs1471484, rs1811442, rs1837891, rs2197120, rs2572318, rs2583968, rs2583975, rs2583978, rs2619349, rs2619355, rs2619368, rs2737025, rs3113355, rs356188, rs356191, rs972880                                                                                                                                                                                                                                                                                                                                                                                               | T                            |
| rs2583981  | SNCA | 4   | 90,971,605  | A            | T            | 0.271            | 1.000                  | flanking 5'UTR                    | NA                             | rs13148411, rs1442146, rs1442147, rs2028535, rs2583958, rs2583959, rs2583965, rs2583966, rs2583969, rs2583970, rs2583971, rs2583973, rs2583974, rs2583977, rs2583980, rs2583983, rs2583984, rs2583985, rs2583987, rs2583988, rs2619350, rs2619353, rs2619354, rs2619358, rs2619360, rs2619361, rs2619364, rs2619367, rs2619371, rs2619373, rs2736995, rs2736998, rs2736999, rs2737000, rs2737001, rs2737006, rs2737008, rs2737009, rs2737012, rs2737013, rs2737014, rs2737015, rs2737022, rs2737023, rs2737024, rs2737033, rs356163, rs356184, rs356189, rs356192, rs356195, rs986609, rs986610, rs990088 | T                            |
| rs2301134  | SNCA | 4   | 90,977,968  | A            | G            | 0.490            | 1.000                  | flanking 5'UTR                    | NA                             | rs10005233, rs1372522, rs1471483, rs6532191, rs7681440, rs7687945                                                                                                                                                                                                                                                                                                                                                                                                                                                                                                                                         | T                            |
| rs3775085  | TDO2 | 4   | 157,042,829 | A            | C            | 0.101            | 1.000                  | flanking 5'UTR                    | NA                             | rs10857287, rs13125676, rs3755907, rs3796551                                                                                                                                                                                                                                                                                                                                                                                                                                                                                                                                                              | T                            |
| rs3755910  | TDO2 | 4   | 157,044,050 | C            | A            | 0.028            | 1.000                  | flanking 5'UTR                    | NA                             | NA                                                                                                                                                                                                                                                                                                                                                                                                                                                                                                                                                                                                        | NA                           |
| rs2271537  | TDO2 | 4   | 157,049,273 | C            | A            | 0.491            | 0.911                  | intron                            | NA                             | rs11723579                                                                                                                                                                                                                                                                                                                                                                                                                                                                                                                                                                                                | T                            |

**Supplemental Table 3: SNP Information**

| SNP        | Gene | Chr | Position    | Major Allele | Minor Allele | MAF <sup>a</sup> | Call Rate <sup>b</sup> | Chromosomal Location <sup>c</sup> | Amino Acid Change <sup>d</sup> | LD Bin ( $r^2 > 0.80$ ) <sup>e</sup>                       | Analysis Sample <sup>f</sup> |
|------------|------|-----|-------------|--------------|--------------|------------------|------------------------|-----------------------------------|--------------------------------|------------------------------------------------------------|------------------------------|
| rs10517626 | TDO2 | 4   | 157,050,894 | G            | T            | 0.103            | 1.000                  | intron                            | NA                             | rs10020753, rs12502494, rs13120854, rs13152449, rs13434811 | T                            |
| rs2878125  | TDO2 | 4   | 157,053,811 | G            | A            | 0.121            | 1.000                  | intron                            | NA                             | rs12502494, rs6817205                                      | T                            |
| rs13152449 | TDO2 | 4   | 157,055,252 | A            | G            | 0.101            | 1.000                  | intron                            | NA                             | rs10020753, rs10517626, rs12502494, rs13120854, rs13434811 | T                            |
| rs11723579 | TDO2 | 4   | 157,057,151 | A            | T            | 0.483            | 1.000                  | intron                            | NA                             | rs2271537                                                  | T                            |
| rs2292537  | TDO2 | 4   | 157,058,912 | T            | C            | 0.095            | 1.000                  | intron                            | NA                             | rs13128945                                                 | T                            |
| rs2292536  | TDO2 | 4   | 157,059,101 | A            | T            | 0.465            | 0.995                  | intron                            | NA                             | rs9044                                                     | T                            |
| rs6856558  | TDO2 | 4   | 157,059,403 | C            | T            | 0.387            | 1.000                  | intron                            | NA                             | rs11946572                                                 | T                            |
| rs9044     | TDO2 | 4   | 157,065,537 | G            | A            | 0.499            | 1.000                  | 3'UTR                             | NA                             | rs2292536                                                  | T                            |
| rs6856354  | TDO2 | 4   | 157,068,548 | A            | C            | 0.350            | 0.998                  | intron                            | NA                             | NA                                                         | T                            |
| rs1004446  | TH   | 11  | 2,126,719   | G            | A            | 0.376            | 1.000                  | flanking 3'UTR                    | NA                             | NA                                                         | T                            |
| rs7924316  | TH   | 11  | 2,130,023   | G            | T            | 0.481            | 0.995                  | flanking 3'UTR                    | NA                             | NA                                                         | T                            |
| rs3842748  | TH   | 11  | 2,137,971   | G            | C            | 0.217            | 0.988                  | intron                            | NA                             | NA                                                         | G                            |
| rs2070762  | TH   | 11  | 2,142,911   | G            | A            | 0.495            | 0.998                  | intron                            | NA                             | NA                                                         | T                            |
| rs6356     | TH   | 11  | 2,147,527   | C            | T            | 0.364            | 0.998                  | coding                            | V108M (NP_954987)              | NA                                                         | T                            |
| rs10770140 | TH   | 11  | 2,150,173   | T            | C            | 0.396            | 0.983                  | flanking 5'UTR                    | NA                             | rs10770141, rs10840495, rs10743152, rs7119275              | G                            |
| rs10770141 | TH   | 11  | 2,150,416   | G            | A            | 0.390            | 0.995                  | flanking 5'UTR                    | NA                             | rs10840495, rs10743152, rs10770140, rs7119275              | T                            |
| rs10743149 | TH   | 11  | 2,150,751   | C            | T            | 0.144            | 1.000                  | flanking 5'UTR                    | NA                             | NA                                                         | T                            |
| rs10840495 | TH   | 11  | 2,152,413   | G            | A            | 0.375            | 0.892                  | flanking 5'UTR                    | NA                             | rs10770141, rs10743152, rs10770140, rs7119275              | T                            |
| rs11042978 | TH   | 11  | 2,154,994   | G            | T            | 0.480            | 1.000                  | flanking 5'UTR                    | NA                             | rs4930046                                                  | T                            |
| rs6578993  | TH   | 11  | 2,157,739   | C            | T            | 0.144            | 1.000                  | flanking 5'UTR                    | NA                             | rs11042982, rs11043001                                     | T                            |
| rs11043001 | TH   | 11  | 2,159,621   | G            | A            | 0.150            | 1.000                  | flanking 5'UTR                    | NA                             | rs6578993                                                  | T                            |
| rs11043003 | TH   | 11  | 2,159,730   | T            | C            | 0.257            | 1.000                  | flanking 5'UTR                    | NA                             | rs11043016, rs11564705, rs11564707, rs7129483              | T                            |
| rs11043016 | TH   | 11  | 2,162,603   | T            | C            | 0.260            | 0.995                  | flanking 5'UTR                    | NA                             | rs11043003, rs11564705, rs11564707, rs7129483              | T                            |
| rs11564703 | TH   | 11  | 2,163,785   | A            | G            | 0.412            | 0.998                  | flanking 5'UTR                    | NA                             | rs11043007, rs7396243                                      | T                            |

<sup>a</sup> Minor allele frequencies and <sup>b</sup> SNP call rates were calculated using subjects in our study sample. We chose SNPs lying within the region 10kb upstream and downstream of each gene of interest. HapMap places some of these SNPs outside of our actual gene of interest, within flanking genes. <sup>c</sup> The chromosomal location is a SNP's position relative to its respective HapMap gene, not necessarily the gene of interest. <sup>d</sup> If applicable, amino acid changes by a SNP are for the HapMap gene. <sup>e</sup> These are all the HapMap SNPs within a given region that can be captured by their respective SNP at a minimum  $r^2$  threshold of 0.80. "NA" indicates a singleton. The majority of subjects were genotyped from genomic DNA samples. However, some were genotyped from whole genome amplified (WGA) DNA samples, a less reliable source. <sup>f</sup> For each SNP, all individuals were analyzed (T) if there was no discrepancy in call rates between genomic DNA and WGA DNA. However, SNPs in which there was this discrepancy were analyzed using only genomic DNA samples (G). Monomorphic SNPs and SNPs with MAFs less than 0.05 were not analyzed and indicated by NA.
